# Supplementary material for: Volatile organic compounds (VOCs) in photochemically aged air from the Eastern andWestern Mediterranean
Source: Copernicus journal article supplement (doi:10.5194/acp-2016-746), 2016-09-06
Supplement: Supplementary file 1 [file acp-2016-746-supplement.pdf]

## S1 Initial values in the CAABA/MECCA box model

| Compound                                  | Initial value<br>in ppbv |
|-------------------------------------------|--------------------------|
| nC <sub>4</sub> H <sub>10</sub>           | 0.2                      |
| NH <sub>3</sub>                           | 8                        |
| C <sub>2</sub> H <sub>6</sub>             | 0.9                      |
| C <sub>3</sub> H <sub>8</sub>             | 0.5                      |
| iC <sub>4</sub> H <sub>10</sub>           | 0.09                     |
| C <sub>2</sub> H <sub>2</sub>             | 0.3                      |
| Toluene                                   | 0.1                      |
| CH <sub>3</sub> CO <sub>3</sub> H         | 0.04                     |
| Benzene                                   | 0.05                     |
| CH <sub>4</sub>                           | 1800                     |
| Xylenes                                   | 0.09                     |
| Ethylbenzene                              | 0.01                     |
| Trimethylbenzenes                         | 0.009                    |
| C <sub>11</sub> H <sub>14</sub> (LHAROM ) | 0.008                    |
| CH <sub>3</sub> CO <sub>2</sub> H         | 0.3                      |
| CH <sub>3</sub> CN                        | 0.01                     |
| PAN                                       | 0.2                      |
| CH <sub>3</sub> OOH                       | 0.25                     |
| HCN                                       | 0.07                     |
| MBO                                       | 0.002                    |
| Methylpropene                             | 0.006                    |
| <i>β</i> -Pinene                          | 0.03                     |
| Sabinene                                  | 0.006                    |
| Camphene                                  | 0.005                    |

| Compound                          | Initial value<br>in ppbv |
|-----------------------------------|--------------------------|
| <i>α</i> -Pinene                  | 0.025                    |
| Carene                            | 0.004                    |
| HONO                              | 0.009                    |
| cBut-2-ene                        | 0.004                    |
| tBut-2-ene                        | 0.003                    |
| CH <sub>3</sub> OH                | 3                        |
| Styrene                           | 0.003                    |
| H <sub>2</sub> O <sub>2</sub>     | 1.8                      |
| CH <sub>3</sub> COCH <sub>3</sub> | 1                        |
| C <sub>5</sub> H <sub>8</sub>     | 0.5                      |
| HNO <sub>3</sub>                  | 0.8                      |
| Hydroxyacetone (Acetol)           | 0.35                     |
| Glyoxal                           | 0.06                     |
| Methylglyoxal                     | 0.1                      |
| CH <sub>3</sub> CHO               | 0.4                      |
| HOCH <sub>2</sub> CHO             | 0.25                     |
| HCOOH                             | 0.25                     |
| CO                                | 100                      |
| O <sub>3</sub>                    | 50                       |
| NO <sub>2</sub>                   | 2                        |
| NO                                | 0.4                      |
| HCHO                              | 2                        |
| O <sub>2</sub>                    | 2.1 × 10 <sup>8</sup>    |
| N <sub>2</sub>                    | 7.8 × 10 <sup>8</sup>    |
| CO <sub>2</sub>                   | 4 × 10 <sup>5</sup>      |

## S2 Mechanism of MECCA

### The Chemical Mechanism of MECCA

KPP version: 2.2.1\_rs7

MECCA version: 3.8

Date: February 9, 2016.

Selected reactions:

“!Ara”

Number of aerosol phases: 1

Number of species in selected mechanism:

Gas phase: 699

Aqueous phase: 89

All species: 788

Number of reactions in selected mechanism:

Gas phase (Gnnn): 1789

Aqueous phase (Annn): 145

Henry (Hnnn): 93

Photolysis (Jnnn): 384

Aqueous phase photolysis (PHnnn): 2

Heterogeneous (HETnnn): 21

Equilibria (EQnn): 68

Isotope exchange (IEXnnn): 0

Tagging equations (TAGnnn): 0

Dummy (Dnn): 1

All equations: 2503

This document is part of the electronic supplement to our article  
“The atmospheric chemistry box model CAABA/MECCA-3.0”  
in Geosci. Model Dev. (2011), available at:  
<http://www.geosci-model-dev.net>

Table 1: Gas phase reactions

| #      | labels  | reaction                                             | rate coefficient                                         | reference                                                |
|--------|---------|------------------------------------------------------|----------------------------------------------------------|----------------------------------------------------------|
| G1000  | UpStTrG | $O_2 + O(^1D) \rightarrow O(^3P) + O_2$              | $3.3E-11*EXP(55./temp)$                                  | Sander et al. (2011)                                     |
| G1001  | UpStTrG | $O_2 + O(^3P) \rightarrow O_3$                       | $6.E-34*((temp/300.)**(-2.4))*cair$                      | Sander et al. (2011)                                     |
| G1002a | UpStG   | $O_3 + O(^1D) \rightarrow 2 O_2$                     | 1.2E-10                                                  | Sander et al. (2011)*                                    |
| G1002b | UpG     | $O_3 + O(^1D) \rightarrow O_2 + 2 O(^3P)$            | 1.2E-10                                                  | Sander et al. (2011)                                     |
| G1003  | UpStG   | $O_3 + O(^3P) \rightarrow 2 O_2$                     | $8.E-12*EXP(-2060./temp)$                                | Sander et al. (2011)                                     |
| G1004  | UpG     | $O_2 + O^+ \rightarrow O_2^+ + O(^3P)$               | $k\_Op\_02(temp,temp\_ion)$                              | Fuller-Rowell (1993)                                     |
| G1101  | UpG     | $O_2^+ + e^- \rightarrow 2 O(^3P)$                   | $2.7E-7*(300./temp\_elec)**.7$                           | Fuller-Rowell (1993)                                     |
| G2100  | UpStTrG | $H + O_2 \rightarrow HO_2$                           | $k\_3rd(temp,cair,4.4E-32,1.3,7.5E-11,-0.2,0.6)$         | Sander et al. (2011)                                     |
| G2101  | UpStG   | $H + O_3 \rightarrow OH + O_2$                       | $1.4E-10*EXP(-470./temp)$                                | Sander et al. (2011)                                     |
| G2102  | UpStG   | $H_2 + O(^1D) \rightarrow H + OH$                    | 1.2E-10                                                  | Sander et al. (2011)                                     |
| G2103  | UpStG   | $OH + O(^3P) \rightarrow H + O_2$                    | $1.8E-11*EXP(180./temp)$                                 | Sander et al. (2011)                                     |
| G2104  | UpStTrG | $OH + O_3 \rightarrow HO_2 + O_2$                    | $1.7E-12*EXP(-940./temp)$                                | Sander et al. (2011)                                     |
| G2105  | UpStTrG | $OH + H_2 \rightarrow H_2O + H$                      | $2.8E-12*EXP(-1800./temp)$                               | Sander et al. (2011)                                     |
| G2106  | UpStG   | $HO_2 + O(^3P) \rightarrow OH + O_2$                 | $3.E-11*EXP(200./temp)$                                  | Sander et al. (2011)                                     |
| G2107  | UpStTrG | $HO_2 + O_3 \rightarrow OH + 2 O_2$                  | $1.E-14*EXP(-490./temp)$                                 | Sander et al. (2011)                                     |
| G2108a | UpStG   | $HO_2 + H \rightarrow 2 OH$                          | 7.2E-11                                                  | Sander et al. (2011)                                     |
| G2108b | UpStG   | $HO_2 + H \rightarrow H_2 + O_2$                     | 6.9E-12                                                  | Sander et al. (2011)                                     |
| G2108c | UpStG   | $HO_2 + H \rightarrow O(^3P) + H_2O$                 | 1.6E-12                                                  | Sander et al. (2011)                                     |
| G2109  | UpStTrG | $HO_2 + OH \rightarrow H_2O + O_2$                   | $4.8E-11*EXP(250./temp)$                                 | Sander et al. (2011)                                     |
| G2110  | UpStTrG | $HO_2 + HO_2 \rightarrow H_2O_2 + O_2$               | $k\_H02\_H02$                                            | Christensen et al. (2002),<br>Kircher and Sander (1984)* |
| G2111  | UpStTrG | $H_2O + O(^1D) \rightarrow 2 OH$                     | $1.63E-10*EXP(60./temp)$                                 | Sander et al. (2011)                                     |
| G2112  | UpStTrG | $H_2O_2 + OH \rightarrow H_2O + HO_2$                | 1.8E-12                                                  | Sander et al. (2011)                                     |
| G2113  | UpG     | $H_2 + O(^3P) \rightarrow H + OH$                    | $1.60E-11*EXP(-4570./temp)$                              | Roble (1995)                                             |
| G2114a | UpG     | $OH + OH \rightarrow H_2O + O(^3P)$                  | $4.20E-12*EXP(-240./temp)$                               | Sander et al. (2003)                                     |
| G2114b | UpG     | $OH + OH \rightarrow H_2O_2$                         | $k\_3rd(temp,cair,6.9E-31,1.0,2.6E-11,0.,0.6)$           | Sander et al. (2011)                                     |
| G2115  | UpG     | $H + H \rightarrow H_2$                              | $5.7E-32*(300./temp)**1.6*cair$                          | Roble (1995)                                             |
| G2116  | UpG     | $H_2O_2 + O(^3P) \rightarrow OH + HO_2$              | $1.40E-12*EXP(-2000./temp)$                              | Sander et al. (2003)                                     |
| G2117  | UpStTrG | $H_2O + H_2O \rightarrow (H_2O)_2$                   | $6.521E-26*temp*EXP(1851.09/temp)*EXP(-5.10485E-3*temp)$ | Scribano et al. (2006)*                                  |
| G2118  | UpStTrG | $(H_2O)_2 \rightarrow H_2O + H_2O$                   | 1.E0                                                     | see note*                                                |
| G3001  | UpGN    | $NO^+ + e^- \rightarrow .15 N + .85 N(^2D) + O(^3P)$ | $4.2E-7*(300./temp\_elec)**0.85$                         | Bailey et al. (2002)                                     |

Table 1: Gas phase reactions (... continued)

| #      | labels   | reaction                                      | rate coefficient                                   | reference                 |
|--------|----------|-----------------------------------------------|----------------------------------------------------|---------------------------|
| G3002  | UpGN     | $N_2^+ + e^- \rightarrow .88 N + 1.12 N(^2D)$ | $1.8E-7*(temp\_elec/300.)**(-0.39)$                | Swaminathan et al. (1998) |
| G3003  | UpGN     | $N(^2D) + e^- \rightarrow N + e^-$            | $3.8E-12*(temp\_elec)**.81$                        | Swaminathan et al. (1998) |
| G3100  | UpStGN   | $N + O_2 \rightarrow NO + O(^3P)$             | $1.5E-11*EXP(-3600./temp)$                         | Sander et al. (2011)      |
| G3101  | UpStTrGN | $N_2 + O(^1D) \rightarrow O(^3P) + N_2$       | $2.15E-11*EXP(110./temp)$                          | Sander et al. (2011)      |
| G3102a | UpStGN   | $N_2O + O(^1D) \rightarrow 2 NO$              | $7.25E-11*EXP(20./temp)$                           | Sander et al. (2011)      |
| G3102b | StGN     | $N_2O + O(^1D) \rightarrow N_2 + O_2$         | $4.63E-11*EXP(20./temp)$                           | Sander et al. (2011)      |
| G3103  | UpStTrGN | $NO + O_3 \rightarrow NO_2 + O_2$             | $3.E-12*EXP(-1500./temp)$                          | Sander et al. (2011)      |
| G3104  | UpStGN   | $NO + N \rightarrow O(^3P) + N_2$             | $2.1E-11*EXP(100./temp)$                           | Sander et al. (2011)      |
| G3105  | UpStGN   | $NO_2 + O(^3P) \rightarrow NO + O_2$          | $5.1E-12*EXP(210./temp)$                           | Sander et al. (2011)      |
| G3106  | StTrGN   | $NO_2 + O_3 \rightarrow NO_3 + O_2$           | $1.2E-13*EXP(-2450./temp)$                         | Sander et al. (2011)      |
| G3107  | UpStGN   | $NO_2 + N \rightarrow N_2O + O(^3P)$          | $5.8E-12*EXP(220./temp)$                           | Sander et al. (2011)      |
| G3108  | StTrGN   | $NO_3 + NO \rightarrow 2 NO_2$                | $1.5E-11*EXP(170./temp)$                           | Sander et al. (2011)      |
| G3109  | UpStTrGN | $NO_3 + NO_2 \rightarrow N_2O_5$              | k_NO3_NO2                                          | Sander et al. (2011)*     |
| G3110  | StTrGN   | $N_2O_5 \rightarrow NO_2 + NO_3$              | k_NO3_NO2/(2.7E-27*EXP(11000./temp))               | Sander et al. (2011)*     |
| G3111  | UpGN     | $N(^2D) + NO \rightarrow N_2 + O(^3P)$        | 6.70E-11                                           | Fuller-Rowell (1993)      |
| G3112  | UpGN     | $N(^2D) + O_2 \rightarrow NO + O(^3P)$        | $6.20E-12*(temp/300.)$                             | Duff et al. (2003)        |
| G3113  | UpGN     | $N(^2D) + O(^3P) \rightarrow N + O(^3P)$      | 6.90E-13                                           | Fell et al. (1990)        |
| G3114  | UpGN     | $N(^2D) + O_3 \rightarrow NO + O_2$           | 0.80E-16                                           | Sander et al. (2003)      |
| G3115  | UpGN     | $NO + O(^3P) \rightarrow NO_2$                | k_3rd(temp, cair, 9.0E-32, 1.5, 3.0E-11, 0.0, 0.6) | Sander et al. (2011)      |
| G3116  | UpGN     | $NO_2 + O(^3P) \rightarrow NO_3$              | k_3rd(temp, cair, 2.5E-31, 1.8, 2.2E-11, 0.7, 0.6) | Sander et al. (2011)      |
| G3117  | UpGN     | $N(^2D) \rightarrow N$                        | 10.6                                               | Fuller-Rowell (1993)      |
| G3118  | UpGN     | $N^+ + O_2 \rightarrow NO + O^+$              | 3.66E-11                                           | Barth (1992)              |
| G3119  | UpGN     | $N_2^+ + O(^3P) \rightarrow NO^+ + N(^2D)$    | k_N2_0(temp, temp_ion)                             | Fuller-Rowell (1993)      |
| G3120a | UpGN     | $N^+ + O_2 \rightarrow NO^+ + O(^3P)$         | 2.60E-10                                           | Fuller-Rowell (1993)      |
| G3120b | UpGN     | $N^+ + O_2 \rightarrow O_2^+ + N$             | 3.10E-10                                           | Swaminathan et al. (1998) |
| G3121  | UpGN     | $N^+ + O(^3P) \rightarrow O^+ + N$            | 1.00E-12                                           | Fuller-Rowell (1993)      |
| G3122  | UpGN     | $O_2^+ + N \rightarrow NO^+ + O(^3P)$         | 1.20E-10                                           | Fuller-Rowell (1993)      |
| G3123  | UpGN     | $O_2^+ + NO \rightarrow NO^+ + O_2$           | 4.40E-10                                           | Fuller-Rowell (1993)      |
| G3124  | UpGN     | $O^+ + N_2 \rightarrow NO^+ + N$              | k_0p_N2(temp, temp_ion)                            | Fuller-Rowell (1993)      |
| G3125  | UpGN     | $N_2^+ + O_2 \rightarrow N_2 + O_2^+$         | $5.10E-11*(temp/300.)**(-0.8)$                     | Fuller-Rowell (1993)      |
| G3200  | TrGN     | $NO + OH \rightarrow HONO$                    | k_3rd(temp, cair, 7.0E-31, 2.6, 3.6E-11, 0.1, 0.6) | Sander et al. (2011)      |

Table 1: Gas phase reactions (... continued)

| #     | labels   | reaction                                                                                                                          | rate coefficient                                                                        | reference                 |
|-------|----------|-----------------------------------------------------------------------------------------------------------------------------------|-----------------------------------------------------------------------------------------|---------------------------|
| G3201 | UpStTrGN | $\text{NO} + \text{HO}_2 \rightarrow \text{NO}_2 + \text{OH}$                                                                     | $3.3\text{E}-12*\text{EXP}(270./\text{temp})$                                           | Sander et al. (2011)      |
| G3202 | UpStTrGN | $\text{NO}_2 + \text{OH} \rightarrow \text{HNO}_3$                                                                                | $k\_3\text{rd}(\text{temp}, \text{cair}, 1.8\text{E}-30, 3.0, 2.8\text{E}-11, 0., 0.6)$ | Sander et al. (2011)      |
| G3203 | StTrGN   | $\text{NO}_2 + \text{HO}_2 \rightarrow \text{HNO}_4$                                                                              | $k\_NO2\_HO2$                                                                           | Sander et al. (2011)*     |
| G3204 | TrGN     | $\text{NO}_3 + \text{HO}_2 \rightarrow \text{NO}_2 + \text{OH} + \text{O}_2$                                                      | $3.5\text{E}-12$                                                                        | Sander et al. (2011)      |
| G3205 | TrGN     | $\text{HONO} + \text{OH} \rightarrow \text{NO}_2 + \text{H}_2\text{O}$                                                            | $1.8\text{E}-11*\text{EXP}(-390./\text{temp})$                                          | Sander et al. (2011)      |
| G3206 | StTrGN   | $\text{HNO}_3 + \text{OH} \rightarrow \text{H}_2\text{O} + \text{NO}_3$                                                           | $k\_HNO3\_OH$                                                                           | Sander et al. (2011)*     |
| G3207 | StTrGN   | $\text{HNO}_4 \rightarrow \text{NO}_2 + \text{HO}_2$                                                                              | $k\_NO2\_HO2/(2.1\text{E}-27*\text{EXP}(10900./\text{temp}))$                           | Sander et al. (2011)*     |
| G3208 | StTrGN   | $\text{HNO}_4 + \text{OH} \rightarrow \text{NO}_2 + \text{H}_2\text{O}$                                                           | $1.3\text{E}-12*\text{EXP}(380./\text{temp})$                                           | Sander et al. (2011)      |
| G3209 | TrGN     | $\text{NH}_3 + \text{OH} \rightarrow \text{NH}_2 + \text{H}_2\text{O}$                                                            | $1.7\text{E}-12*\text{EXP}(-710./\text{temp})$                                          | Kohlmann and Poppe (1999) |
| G3210 | TrGN     | $\text{NH}_2 + \text{O}_3 \rightarrow \text{NH}_2\text{O} + \text{O}_2$                                                           | $4.3\text{E}-12*\text{EXP}(-930./\text{temp})$                                          | Kohlmann and Poppe (1999) |
| G3211 | TrGN     | $\text{NH}_2 + \text{HO}_2 \rightarrow \text{NH}_2\text{O} + \text{OH}$                                                           | $4.8\text{E}-07*\text{EXP}(-628./\text{temp})$                                          | Kohlmann and Poppe (1999) |
| G3212 | TrGN     | $\text{NH}_2 + \text{HO}_2 \rightarrow \text{HNO} + \text{H}_2\text{O}$                                                           | $9.4\text{E}-09*\text{EXP}(-356./\text{temp})$                                          | Kohlmann and Poppe (1999) |
| G3213 | TrGN     | $\text{NH}_2 + \text{NO} \rightarrow \text{HO}_2 + \text{OH} + \text{N}_2$                                                        | $1.92\text{E}-12*((\text{temp}/298.)**(-1.5))$                                          | Kohlmann and Poppe (1999) |
| G3214 | TrGN     | $\text{NH}_2 + \text{NO} \rightarrow \text{N}_2 + \text{H}_2\text{O}$                                                             | $1.41\text{E}-11*((\text{temp}/298.)**(-1.5))$                                          | Kohlmann and Poppe (1999) |
| G3215 | TrGN     | $\text{NH}_2 + \text{NO}_2 \rightarrow \text{N}_2\text{O} + \text{H}_2\text{O}$                                                   | $1.2\text{E}-11*((\text{temp}/298.)**(-2.0))$                                           | Kohlmann and Poppe (1999) |
| G3216 | TrGN     | $\text{NH}_2 + \text{NO}_2 \rightarrow \text{NH}_2\text{O} + \text{NO}$                                                           | $0.8\text{E}-11*((\text{temp}/298.)**(-2.0))$                                           | Kohlmann and Poppe (1999) |
| G3217 | TrGN     | $\text{NH}_2\text{O} + \text{O}_3 \rightarrow \text{NH}_2 + \text{O}_2$                                                           | $1.2\text{E}-14$                                                                        | Kohlmann and Poppe (1999) |
| G3218 | TrGN     | $\text{NH}_2\text{O} \rightarrow \text{NHOH}$                                                                                     | $1.3\text{E}3$                                                                          | Kohlmann and Poppe (1999) |
| G3219 | TrGN     | $\text{HNO} + \text{OH} \rightarrow \text{NO} + \text{H}_2\text{O}$                                                               | $8.0\text{E}-11*\text{EXP}(-500./\text{temp})$                                          | Kohlmann and Poppe (1999) |
| G3220 | TrGN     | $\text{HNO} + \text{NHOH} \rightarrow \text{NH}_2\text{OH} + \text{NO}$                                                           | $1.66\text{E}-12*\text{EXP}(-1500./\text{temp})$                                        | Kohlmann and Poppe (1999) |
| G3221 | TrGN     | $\text{HNO} + \text{NO}_2 \rightarrow \text{HONO} + \text{NO}$                                                                    | $1.0\text{E}-12*\text{EXP}(-1000./\text{temp})$                                         | Kohlmann and Poppe (1999) |
| G3222 | TrGN     | $\text{NHOH} + \text{OH} \rightarrow \text{HNO} + \text{H}_2\text{O}$                                                             | $1.66\text{E}-12$                                                                       | Kohlmann and Poppe (1999) |
| G3223 | TrGN     | $\text{NH}_2\text{OH} + \text{OH} \rightarrow \text{NHOH} + \text{H}_2\text{O}$                                                   | $4.13\text{E}-11*\text{EXP}(-2138./\text{temp})$                                        | Kohlmann and Poppe (1999) |
| G3224 | TrGN     | $\text{HNO} + \text{O}_2 \rightarrow \text{HO}_2 + \text{NO}$                                                                     | $3.65\text{E}-14*\text{EXP}(-4600./\text{temp})$                                        | Kohlmann and Poppe (1999) |
| G3225 | UpGN     | $\text{N} + \text{OH} \rightarrow \text{NO} + \text{H}$                                                                           | $5.00\text{E}-11$                                                                       | Roble (1995)              |
| G3226 | UpGN     | $\text{NO}_2 + \text{H} \rightarrow \text{NO} + \text{OH}$                                                                        | $4.00\text{E}-10*\text{EXP}(-340./\text{temp})$                                         | Sander et al. (2003)      |
| G4100 | UpStG    | $\text{CH}_4 + \text{O}(^1\text{D}) \rightarrow .75 \text{CH}_3 + .75 \text{OH} + .25 \text{HCHO} + .4 \text{H} + .05 \text{H}_2$ | $1.75\text{E}-10$                                                                       | Sander et al. (2011)      |
| G4101 | StTrG    | $\text{CH}_4 + \text{OH} \rightarrow \text{CH}_3 + \text{H}_2\text{O}$                                                            | $1.85\text{E}-20*\text{EXP}(2.82*\text{LOG}(\text{temp}) - 987./\text{temp})$           | Atkinson (2003)           |

Table 1: Gas phase reactions (... continued)

| #      | labels  | reaction                                                                                                                        | rate coefficient                                                                                        | reference                                                                       |
|--------|---------|---------------------------------------------------------------------------------------------------------------------------------|---------------------------------------------------------------------------------------------------------|---------------------------------------------------------------------------------|
| G4102  | TrG     | $\text{CH}_3\text{OH} + \text{OH} \rightarrow .85 \text{HCHO} + .85 \text{HO}_2 + .15 \text{CH}_3\text{O} + \text{H}_2\text{O}$ | $6.38\text{E}-18*\text{temp}^{**2}.*\text{EXP}(144./\text{temp})$                                       | Atkinson et al. (2006)                                                          |
| G4103a | StTrG   | $\text{CH}_3\text{O}_2 + \text{HO}_2 \rightarrow \text{CH}_3\text{OOH} + \text{O}_2$                                            | $3.8\text{E}-13*\text{EXP}(780./\text{temp})/(1.+1./498.*\text{EXP}(1160./\text{temp}))$                | Atkinson et al. (2006)                                                          |
| G4103b | StTrG   | $\text{CH}_3\text{O}_2 + \text{HO}_2 \rightarrow \text{HCHO} + \text{H}_2\text{O} + \text{O}_2$                                 | $3.8\text{E}-13*\text{EXP}(780./\text{temp})/(1.+498.*\text{EXP}(-1160./\text{temp}))$                  | Atkinson et al. (2006)                                                          |
| G4104a | StTrGN  | $\text{CH}_3\text{O}_2 + \text{NO} \rightarrow \text{CH}_3\text{O} + \text{NO}_2$                                               | $2.3\text{E}-12*\text{EXP}(360./\text{temp})* (1.-\text{beta}_{\text{CH3NO3}})$                         | Atkinson et al. (2006), Butkovskaya et al. (2012), Flocke et al. (1998)         |
| G4104b | StTrGN  | $\text{CH}_3\text{O}_2 + \text{NO} \rightarrow \text{CH}_3\text{ONO}_2$                                                         | $2.3\text{E}-12*\text{EXP}(360./\text{temp})*\text{beta}_{\text{CH3NO3}}$                               | Atkinson et al. (2006), Butkovskaya et al. (2012), Flocke et al. (1998)*        |
| G4105  | TrGN    | $\text{CH}_3\text{O}_2 + \text{NO}_3 \rightarrow \text{CH}_3\text{O} + \text{NO}_2 + \text{O}_2$                                | 1.2E-12                                                                                                 | Atkinson et al. (2006)                                                          |
| G4106a | StTrG   | $\text{CH}_3\text{O}_2 \rightarrow \text{CH}_3\text{O} + .5 \text{O}_2$                                                         | $7.4\text{E}-13*\text{EXP}(-520./\text{temp})*\text{R02}^*2.$                                           | Atkinson et al. (2006)                                                          |
| G4106b | StTrG   | $\text{CH}_3\text{O}_2 \rightarrow .5 \text{HCHO} + .5 \text{CH}_3\text{OH} + .5 \text{O}_2$                                    | $(\text{k}_{\text{CH3O2}}-7.4\text{E}-13*\text{EXP}(-520./\text{temp})) * \text{R02}^*2.$               | Atkinson et al. (2006)                                                          |
| G4107  | StTrG   | $\text{CH}_3\text{OOH} + \text{OH} \rightarrow .6 \text{CH}_3\text{O}_2 + .4 \text{HCHO} + .4 \text{OH} + \text{H}_2\text{O}$   | $\text{k}_{\text{CH3OOH\_OH}}$                                                                          | Wallington et al.                                                               |
| G4108  | StTrG   | $\text{HCHO} + \text{OH} \rightarrow \text{CO} + \text{H}_2\text{O} + \text{HO}_2$                                              | $9.52\text{E}-18*\text{EXP}(2.03*\text{LOG}(\text{temp})+636./\text{temp})$                             | Sivakumaran et al. (2003)                                                       |
| G4109  | TrGN    | $\text{HCHO} + \text{NO}_3 \rightarrow \text{HNO}_3 + \text{CO} + \text{HO}_2$                                                  | $3.4\text{E}-13*\text{EXP}(-1900./\text{temp})$                                                         | Sander et al. (2011)                                                            |
| G4110  | UpStTrG | $\text{CO} + \text{OH} \rightarrow \text{H} + \text{CO}_2$                                                                      | $(1.57\text{E}-13+\text{cair}*3.54\text{E}-33)$                                                         | McCabe et al. (2001)                                                            |
| G4111  | TrG     | $\text{HCOOH} + \text{OH} \rightarrow \text{CO}_2 + \text{HO}_2 + \text{H}_2\text{O}$                                           | $2.94\text{E}-14*\text{exp}(786./\text{temp})+9.85\text{E}-13*\text{EXP}(-1036./\text{temp})$           | Paulot et al. (2011)                                                            |
| G4112  | UpStG   | $\text{CO} + \text{O}(^3\text{P}) \rightarrow \text{CO}_2$                                                                      | $6.60\text{E}-33*\text{EXP}(-1103./\text{temp})$                                                        | Roble (1995)                                                                    |
| G4113  | UpStG   | $\text{CH}_4 + \text{O}(^3\text{P}) \rightarrow .51 \text{CH}_3 + .51 \text{OH} + .49 \text{CH}_3\text{O} + .49 \text{H}$       | $6.03\text{E}-18*\text{temp}^{**}(2.17)*\text{EXP}(-3619./\text{temp})$                                 | Roble (1995), Garton et al. (2003), Espinosa-Garcia and Garcia-Bernáldez (2000) |
| G4114  | StTrGN  | $\text{CH}_3\text{O}_2 + \text{NO}_2 \rightarrow \text{CH}_3\text{O}_2\text{NO}_2$                                              | $\text{k}_{\text{NO2\_CH3O2}}$                                                                          | Sander et al. (2011)                                                            |
| G4115  | StTrGN  | $\text{CH}_3\text{O}_2\text{NO}_2 \rightarrow \text{CH}_3\text{O}_2 + \text{NO}_2$                                              | $\text{k}_{\text{NO2\_CH3O2}}/(9.5\text{E}-29*\text{EXP}(11234./\text{temp}))$                          | Sander et al. (2011)                                                            |
| G4116  | StTrGN  | $\text{CH}_3\text{O}_2\text{NO}_2 + \text{OH} \rightarrow \text{HCHO} + \text{NO}_3 + \text{H}_2\text{O}$                       | 3.00E-14                                                                                                | see note*                                                                       |
| G4117  | StTrGN  | $\text{CH}_3\text{ONO}_2 + \text{OH} \rightarrow \text{H}_2\text{O} + \text{HCHO} + \text{NO}_2$                                | $4.0\text{E}-13*\text{EXP}(-845./\text{temp})$                                                          | Atkinson et al. (2006)                                                          |
| G4118  | StTrG   | $\text{CH}_3\text{O} \rightarrow \text{HO}_2 + \text{HCHO}$                                                                     | $1.3\text{E}-14*\text{exp}(-663./\text{temp})*\text{c}(\text{ind}_{\text{O2}})$                         | Chai et al. (2014)                                                              |
| G4119a | StTrGN  | $\text{CH}_3\text{O} + \text{NO}_2 \rightarrow \text{CH}_3\text{ONO}_2$                                                         | $\text{k}_{\text{3rd\_iupac}}(\text{temp}, \text{cair}, 8.1\text{E}-29, 4.5, 2.1\text{E}-11, 0., 0.44)$ | Atkinson et al. (2006)                                                          |

Table 1: Gas phase reactions (... continued)

| #      | labels | reaction                                                                                                                                                                 | rate coefficient                                                                                                                                  | reference                                |
|--------|--------|--------------------------------------------------------------------------------------------------------------------------------------------------------------------------|---------------------------------------------------------------------------------------------------------------------------------------------------|------------------------------------------|
| G4119b | StTrGN | $\text{CH}_3\text{O} + \text{NO}_2 \rightarrow \text{HCHO} + \text{HONO}$                                                                                                | $9.6\text{E-}12 \cdot \text{EXP}(-1150./\text{temp})$                                                                                             | Atkinson et al. (2006)                   |
| G4120a | StTrGN | $\text{CH}_3\text{O} + \text{NO} \rightarrow \text{CH}_3\text{ONO}$                                                                                                      | $k\_3\text{rd\_iupac}(\text{temp}, \text{cair}, 2.6\text{E-}29, 2.8, 3.3\text{E-}11, 0.6, \text{REAL}(\text{EXP}(-\text{temp}/900.), \text{SP}))$ | Atkinson et al. (2006)                   |
| G4120b | StTrGN | $\text{CH}_3\text{O} + \text{NO} \rightarrow \text{HCHO} + \text{HNO}$                                                                                                   | $2.3\text{E-}12 \cdot (\text{temp}/300.)^{**0.7}$                                                                                                 | Atkinson et al. (2006)                   |
| G4121  | StTrG  | $\text{CH}_3\text{O}_2 + \text{O}_3 \rightarrow \text{CH}_3\text{O} + 2 \text{O}_2$                                                                                      | $2.9\text{E-}16 \cdot \text{exp}(-1000./\text{temp})$                                                                                             | Sander et al. (2011)                     |
| G4122  | StTrGN | $\text{CH}_3\text{ONO} + \text{OH} \rightarrow \text{H}_2\text{O} + \text{HCHO} + \text{NO}$                                                                             | $1.\text{E-}10 \cdot \text{exp}(-1764./\text{temp})$                                                                                              | Nielsen et al. (1991)                    |
| G4123  | StTrG  | $\text{HCHO} + \text{HO}_2 \rightarrow \text{HOCH}_2\text{O}_2$                                                                                                          | $9.7\text{E-}15 \cdot \text{EXP}(625./\text{temp})$                                                                                               | Atkinson et al. (2006)                   |
| G4124  | StTrG  | $\text{HOCH}_2\text{O}_2 \rightarrow \text{HCHO} + \text{HO}_2$                                                                                                          | $2.4\text{E}12 \cdot \text{EXP}(-7000./\text{temp})$                                                                                              | Atkinson et al. (2006)                   |
| G4125  | StTrG  | $\text{HOCH}_2\text{O}_2 + \text{HO}_2 \rightarrow .5 \text{HOCH}_2\text{OOH} + .5 \text{HCOOH} + .2 \text{OH} + .2 \text{HO}_2 + .3 \text{H}_2\text{O} + .8 \text{O}_2$ | $5.6\text{E-}15 \cdot \text{EXP}(2300./\text{temp})$                                                                                              | Atkinson et al. (2006)                   |
| G4126  | StTrGN | $\text{HOCH}_2\text{O}_2 + \text{NO} \rightarrow \text{NO}_2 + \text{HO}_2 + \text{HCOOH}$                                                                               | $0.7275 \cdot 2.3\text{E-}12 \cdot \text{EXP}(360./\text{temp})$                                                                                  | Atkinson et al. (2006)*                  |
| G4127  | StTrGN | $\text{HOCH}_2\text{O}_2 + \text{NO}_3 \rightarrow \text{NO}_2 + \text{HO}_2 + \text{HCOOH}$                                                                             | 1.2E-12                                                                                                                                           | see note*                                |
| G4129a | StTrG  | $\text{HOCH}_2\text{O}_2 \rightarrow \text{HCOOH} + \text{HO}_2$                                                                                                         | $(k\_CH302 \cdot 5.5\text{E-}12) \cdot **0.5 \cdot \text{R02} \cdot 2.$                                                                           | Atkinson et al. (2006)                   |
| G4129b | StTrG  | $\text{HOCH}_2\text{O}_2 \rightarrow .5 \text{HCOOH} + .5 \text{HOCH}_2\text{OH} + .5 \text{O}_2$                                                                        | $(k\_CH302 \cdot 5.7\text{E-}14 \cdot \text{EXP}(750./\text{temp})) \cdot **0.5 \cdot \text{R02} \cdot 2.$                                        | Atkinson et al. (2006)                   |
| G4130a | StTrG  | $\text{HOCH}_2\text{OOH} + \text{OH} \rightarrow \text{HOCH}_2\text{O}_2 + \text{H}_2\text{O}$                                                                           | $0.6 \cdot k\_CH300H\_OH$                                                                                                                         | Taraborrelli (2010)*                     |
| G4130b | StTrG  | $\text{HOCH}_2\text{OOH} + \text{OH} \rightarrow \text{HCOOH} + \text{H}_2\text{O} + \text{OH}$                                                                          | $k\_rohro + k\_s \cdot f\_sooh \cdot f\_soh$                                                                                                      | Taraborrelli (2010)*                     |
| G4132  | StTrG  | $\text{HOCH}_2\text{OH} + \text{OH} \rightarrow \text{HO}_2 + \text{HCOOH} + \text{H}_2\text{O}$                                                                         | $k\_rohro + 2 \cdot k\_s \cdot f\_soh \cdot f\_soh$                                                                                               | Taraborrelli (2010)*                     |
| G4133  | StTrG  | $\text{CH}_3\text{O}_2 + \text{OH} \rightarrow \text{CH}_3\text{O} + \text{HO}_2$                                                                                        | 1.4E-10                                                                                                                                           | Bossolasco et al. (2014)*                |
| G4134  | StTrG  | $\text{CH}_2\text{OO} \rightarrow \text{CO} + \text{HO}_2 + \text{OH}$                                                                                                   | $1.124\text{E+}14 \cdot \text{EXP}(-10000/\text{temp})$                                                                                           | see note*                                |
| G4135  | StTrG  | $\text{CH}_2\text{OO} + \text{H}_2\text{O} \rightarrow \text{HOCH}_2\text{OOH}$                                                                                          | $k\_CH200\_N02 \cdot 3.6\text{E-}6$                                                                                                               | Ouyang et al. (2013)*                    |
| G4136  | StTrG  | $\text{CH}_2\text{OO} + (\text{H}_2\text{O})_2 \rightarrow \text{HOCH}_2\text{OOH} + \text{H}_2\text{O}$                                                                 | 5.2E-12                                                                                                                                           | Chao et al. (2015), Lewis et al. (2015)* |
| G4137  | StTrGN | $\text{CH}_2\text{OO} + \text{NO} \rightarrow \text{HCHO} + \text{NO}_2$                                                                                                 | 6.E-14                                                                                                                                            | Welz et al. (2012)*                      |
| G4138  | StTrGN | $\text{CH}_2\text{OO} + \text{NO}_2 \rightarrow \text{HCHO} + \text{NO}_3$                                                                                               | $k\_CH200\_N02$                                                                                                                                   | Welz et al. (2012), Stone et al. (2014)* |
| G4140  | StTrG  | $\text{CH}_2\text{OO} + \text{CO} \rightarrow \text{HCHO} + \text{CO}_2$                                                                                                 | 3.6E-14                                                                                                                                           | Vereecken et al. (2012)                  |
| G4141  | StTrG  | $\text{CH}_2\text{OO} + \text{HCOOH} \rightarrow 2 \text{HCOOH}$                                                                                                         | 1.E-10                                                                                                                                            | Welz et al. (2014)*                      |
| G4142  | StTrG  | $\text{CH}_2\text{OO} + \text{HCHO} \rightarrow 2 \text{LCARBON}$                                                                                                        | 1.7E-12                                                                                                                                           | Stone et al. (2014)*                     |
| G4143  | StTrG  | $\text{CH}_2\text{OO} + \text{CH}_3\text{OH} \rightarrow 2 \text{LCARBON}$                                                                                               | 5.E-12                                                                                                                                            | Vereecken et al. (2012)*                 |
| G4144  | StTrG  | $\text{CH}_2\text{OO} + \text{CH}_3\text{O}_2 \rightarrow 2 \text{LCARBON}$                                                                                              | 5.E-12                                                                                                                                            | Vereecken et al. (2012)*                 |
| G4145  | StTrG  | $\text{CH}_2\text{OO} + \text{HO}_2 \rightarrow \text{LCARBON}$                                                                                                          | 5.E-12                                                                                                                                            | Vereecken et al. (2012)                  |
| G4146  | StTrG  | $\text{CH}_2\text{OO} + \text{O}_3 \rightarrow \text{HCHO} + 2 \text{O}_2$                                                                                               | 1.E-12                                                                                                                                            | Vereecken et al. (2014)                  |
| G4147  | StTrG  | $\text{CH}_2\text{OO} + \text{CH}_2\text{OO} \rightarrow 2 \text{HCHO} + \text{O}_2$                                                                                     | 6.E-11                                                                                                                                            | Buras et al. (2014)                      |

Table 1: Gas phase reactions (... continued)

| #      | labels | reaction                                                                                                                                                 | rate coefficient                                                                | reference                                         |
|--------|--------|----------------------------------------------------------------------------------------------------------------------------------------------------------|---------------------------------------------------------------------------------|---------------------------------------------------|
| G4148  | StTrGN | $\text{HOCH}_2\text{O}_2 + \text{NO}_2 \rightarrow \text{HOCH}_2\text{O}_2\text{NO}_2$                                                                   | k_NO2_CH302                                                                     | Sander et al. (2011)                              |
| G4149  | StTrGN | $\text{HOCH}_2\text{O}_2\text{NO}_2 \rightarrow \text{HOCH}_2\text{O}_2 + \text{NO}_2$                                                                   | k_NO2_CH302/(9.5E-29*EXP(11234./temp))                                          | Sander et al. (2011), Barnes et al. (1985)*       |
| G4150  | StTrGN | $\text{HOCH}_2\text{O}_2\text{NO}_2 + \text{OH} \rightarrow \text{HCOOH} + \text{NO}_3 + \text{H}_2\text{O}$                                             | 9.50E-13*EXP(-650./temp)*f_soh                                                  | see note*                                         |
| G4151  | StTrG  | $\text{CH}_3 + \text{O}_2 \rightarrow \text{CH}_3\text{O}_2$                                                                                             | k_3rd_iupac(temp, cair, 7.0E-31, 3., 1.8E-12, -1.1, 0.33)                       | Atkinson et al. (2006)                            |
| G4152  | StTrG  | $\text{CH}_3 + \text{O}_3 \rightarrow .956 \text{HCHO} + .956 \text{H} + .044 \text{CH}_3\text{O} + \text{O}_2$                                          | 5.1E-12*exp(-210./temp)                                                         | Albaladejo et al. (2002), Ogryzlo et al. (1981)   |
| G4153  | StTrG  | $\text{CH}_3 + \text{O}(^3\text{P}) \rightarrow .83 \text{HCHO} + .83 \text{H} + .17 \text{CO} + .17 \text{H}_2 + .17 \text{H}$                          | 1.3E-10                                                                         | Atkinson et al. (2006)                            |
| G4154  | StTrG  | $\text{CH}_3\text{O} + \text{O}_3 \rightarrow \text{CH}_3\text{O}_2 + \text{O}_2$                                                                        | 2.53E-14                                                                        | Albaladejo et al. (2002)*                         |
| G4155  | StTrG  | $\text{CH}_3\text{O} + \text{O}(^3\text{P}) \rightarrow .75 \text{CH}_3 + .75 \text{O}_2 + .25 \text{HCHO} + .25 \text{OH}$                              | 2.5E-11                                                                         | Baulch et al. (2005)                              |
| G4156  | StTrG  | $\text{CH}_3\text{O}_2 + \text{O}(^3\text{P}) \rightarrow \text{CH}_3\text{O} + \text{O}_2$                                                              | 4.3E-11                                                                         | Zellner et al. (1988)                             |
| G4157  | StTrG  | $\text{HCHO} + \text{O}(^3\text{P}) \rightarrow .7 \text{OH} + .7 \text{CO} + .3 \text{H} + .3 \text{CO}_2 + \text{HO}_2$                                | 3.E-11*EXP(-1600./temp)                                                         | Sander et al. (2011)                              |
| G4158  | TrG    | $\text{CH}_2\text{OO}^* \rightarrow .37 \text{CH}_2\text{OO} + .47 \text{CO} + .47 \text{H}_2\text{O} + .16 \text{HO}_2 + .16 \text{CO} + .16 \text{OH}$ | KDEC                                                                            | Atkinson et al. (2006)                            |
| G4159  | TrGN   | $\text{HCN} + \text{OH} \rightarrow \text{H}_2\text{O} + \text{CN}$                                                                                      | k_3rd(temp, cair, 4.28E-33, 1.0, REAL(4.25E-13*EXP(-1150./temp), SP), 1.0, 0.8) | Kleinböhl et al. (2006)                           |
| G4160a | TrGN   | $\text{HCN} + \text{O}(^1\text{D}) \rightarrow \text{O}(^3\text{P}) + \text{HCN}$                                                                        | 1.08E-10*EXP(105./temp)*0.15*EXP(200/temp)                                      | Strekowski et al. (2010)                          |
| G4160b | TrGN   | $\text{HCN} + \text{O}(^1\text{D}) \rightarrow \text{H} + \text{NCO}$                                                                                    | 1.08E-10*EXP(105./temp)*0.68/2.                                                 | Strekowski et al. (2010)*                         |
| G4160c | TrGN   | $\text{HCN} + \text{O}(^1\text{D}) \rightarrow \text{OH} + \text{CN}$                                                                                    | 1.08E-10*EXP(105./temp)*(1.-(0.68/2.+0.15*EXP(200/temp)))                       | Strekowski et al. (2010)*                         |
| G4161  | TrGN   | $\text{HCN} + \text{O}(^3\text{P}) \rightarrow \text{H} + \text{NCO}$                                                                                    | 1.0E-11*EXP(-4000./temp)                                                        | Sander et al. (2011)*                             |
| G4162  | TrGN   | $\text{CN} + \text{O}_2 \rightarrow \text{NCO} + \text{O}(^3\text{P})$                                                                                   | 1.2E-11*EXP(210./temp)*0.75                                                     | Baulch et al. (2005)                              |
| G4163  | TrGN   | $\text{CN} + \text{O}_2 \rightarrow \text{CO} + \text{NO}$                                                                                               | 1.2E-11*EXP(210./temp)*0.25                                                     | Baulch et al. (2005)                              |
| G4164  | TrGN   | $\text{NCO} + \text{O}_2 \rightarrow \text{CO}_2 + \text{NO}$                                                                                            | 7.E-15                                                                          | Becker et al. (2000)*                             |
| G42000 | TrGC   | $\text{C}_2\text{H}_6 + \text{OH} \rightarrow \text{C}_2\text{H}_5\text{O}_2 + \text{H}_2\text{O}$                                                       | 1.49E-17*temp*temp*EXP(-499./temp)                                              | Atkinson et al. (2006)                            |
| G42001 | TrGC   | $\text{C}_2\text{H}_4 + \text{O}_3 \rightarrow \text{HCHO} + \text{CH}_2\text{OO}^*$                                                                     | 9.1E-15*EXP(-2580./temp)                                                        | Atkinson et al. (2006)*                           |
| G42002 | TrGC   | $\text{C}_2\text{H}_4 + \text{OH} \rightarrow \text{HOCH}_2\text{CH}_2\text{O}_2$                                                                        | k_3rd_iupac(temp, cair, 8.6E-29, 3.1, 9.E-12, 0.85, 0.48)                       | Atkinson et al. (2006), Rickard and Pascoe (2009) |



Table 1: Gas phase reactions (... continued)

| #       | labels | reaction                                                   | rate coefficient                                               | reference                                         |
|---------|--------|------------------------------------------------------------|----------------------------------------------------------------|---------------------------------------------------|
| G42003  | TrGC   | $C_2H_5O_2 + HO_2 \rightarrow C_2H_5OOH$                   | $7.5E-13*EXP(700./temp)$                                       | Sander et al. (2011)                              |
| G42004a | TrGCN  | $C_2H_5O_2 + NO \rightarrow CH_3CHO + HO_2 + NO_2$         | $2.55E-12*EXP(380./temp)*(1.-beta_{C2H5N03})$                  | Atkinson et al. (2006), Butkovskaya et al. (2010) |
| G42004b | TrGCN  | $C_2H_5O_2 + NO \rightarrow C_2H_5ONO_2$                   | $2.55E-12*EXP(380./temp)*beta_{C2H5N03}$                       | Atkinson et al. (2006), Butkovskaya et al. (2010) |
| G42005  | TrGCN  | $C_2H_5O_2 + NO_3 \rightarrow CH_3CHO + HO_2 + NO_2$       | $2.3E-12$                                                      | Wallington et al.                                 |
| G42006  | TrGC   | $C_2H_5O_2 \rightarrow .8 CH_3CHO + .6 HO_2 + .2 C_2H_5OH$ | $2.*(7.6E-14*k_{CH3O2})*(.5)*R02$                              | Taraborrelli (2016), Atkinson et al. (2006)       |
| G42007a | TrGC   | $C_2H_5OOH + OH \rightarrow C_2H_5O_2 + H_2O$              | $0.6*k_{CH3OOH\_OH}$                                           | Taraborrelli (2016)                               |
| G42007b | TrGC   | $C_2H_5OOH + OH \rightarrow CH_3CHO + OH$                  | $k_{s*f\_sooh}$                                                | Taraborrelli (2016)                               |
| G42008a | TrGC   | $CH_3CHO + OH \rightarrow CH_3C(O) + H_2O$                 | $4.4E-12*EXP(365./temp)*0.95$                                  | Atkinson et al. (2006)                            |
| G42008b | TrGC   | $CH_3CHO + OH \rightarrow HCOCH_2O_2 + H_2O$               | $4.4E-12*EXP(365./temp)*0.05$                                  | Atkinson et al. (2006)                            |
| G42009  | TrGCN  | $CH_3CHO + NO_3 \rightarrow CH_3C(O) + HNO_3$              | KN03AL                                                         | Rickard and Pascoe (2009)                         |
| G42010  | TrGC   | $CH_3COOH + OH \rightarrow CH_3 + CO_2 + H_2O$             | $4.0E-14*EXP(850./temp)$                                       | Atkinson et al. (2006)*                           |
| G42011a | TrGC   | $CH_3C(O)OO + HO_2 \rightarrow OH + CH_3 + CO_2$           | $5.20E-13*EXP(980./temp)*1.507*0.61$                           | Groß et al. (2014)                                |
| G42011b | TrGC   | $CH_3C(O)OO + HO_2 \rightarrow CH_3C(O)OOH$                | $5.20E-13*EXP(980./temp)*1.507*0.23$                           | Groß et al. (2014)                                |
| G42011c | TrGC   | $CH_3C(O)OO + HO_2 \rightarrow CH_3COOH + O_3$             | $5.20E-13*EXP(980./temp)*1.507*0.16$                           | Groß et al. (2014)                                |
| G42012  | TrGCN  | $CH_3C(O)OO + NO \rightarrow CH_3 + CO_2 + NO_2$           | $8.1E-12*EXP(270./temp)$                                       | Tyndall et al. (2001a)                            |
| G42013  | TrGCN  | $CH_3C(O)OO + NO_2 \rightarrow PAN$                        | $k_{CH3CO3\_NO2}$                                              | Sander et al. (2011)*                             |
| G42014  | TrGCN  | $CH_3C(O)OO + NO_3 \rightarrow CH_3 + NO_2 + CO_2$         | $4.E-12$                                                       | Canosa-Mas et al. (1996)                          |
| G42017a | TrGC   | $CH_3C(O)OO \rightarrow CH_3 + CO_2$                       | $k1_{R02RC03}*0.9$                                             | Taraborrelli (2016)                               |
| G42017b | TrGC   | $CH_3C(O)OO \rightarrow CH_3COOH$                          | $k1_{R02RC03}*0.1$                                             | Taraborrelli (2016)                               |
| G42018  | TrGC   | $CH_3C(O)OOH + OH \rightarrow CH_3C(O)OO + H_2O$           | $0.6*k_{CH3OOH\_OH}$                                           | Rickard and Pascoe (2009)*                        |
| G42020  | TrGCN  | $PAN + OH \rightarrow HCHO + CO + NO_2 + H_2O$             | $3.00E-14$                                                     | Rickard and Pascoe (2009)                         |
| G42021  | TrGCN  | $PAN \rightarrow CH_3C(O)OO + NO_2$                        | $k_{PAN\_M}$                                                   | Sander et al. (2011)*                             |
| G42022a | TrGC   | $C_2H_2 + OH \rightarrow GLYOX + OH$                       | $k_{3rd}(temp, cair, 5.5e-30, 0.0, 8.3e-13, 2., 0.6)*.71$      | Sander et al. (2011), Glowacki et al. (2012)      |
| G42022b | TrGC   | $C_2H_2 + OH \rightarrow HCOOH + CO + HO_2$                | $k_{3rd}(temp, cair, 5.5e-30, 0.0, 8.3e-13, 2., 0.6)*(1.-.71)$ | Sander et al. (2011), Glowacki et al. (2012)      |
| G42023a | TrGC   | $HOCH_2CHO + OH \rightarrow HOCH_2CO + H_2O$               | $8.00E-12*0.80$                                                | Atkinson et al. (2006)                            |
| G42023b | TrGC   | $HOCH_2CHO + OH \rightarrow HOCHCHO + H_2O$                | $8.00E-12*0.20$                                                | Atkinson et al. (2006)                            |
| G42024a | TrGC   | $HOCH_2CO + O_2 \rightarrow HOCH_2CO_3$                    | $5.1E-12*(1.-1./(1+1.85E-18*cair))$                            | Atkinson et al. (2006), Beyersdorf et al. (2010)* |
| G42024b | TrGC   | $HOCH_2CO + O_2 \rightarrow OH + HCHO + CO_2$              | $5.1E-12*1./(1+1.85E-18*cair)$                                 | Atkinson et al. (2006), Beyersdorf et al. (2010)* |

Table 1: Gas phase reactions (... continued)

| #       | labels | reaction                                                                                                                                                     | rate coefficient                               | reference                                                                     |
|---------|--------|--------------------------------------------------------------------------------------------------------------------------------------------------------------|------------------------------------------------|-------------------------------------------------------------------------------|
| G42025  | TrGC   | $\text{HOCHCHO} \rightarrow \text{GLYOX} + \text{HO}_2$                                                                                                      | KDEC                                           | Taraborrelli (2016)                                                           |
| G42026  | TrGCN  | $\text{HOCH}_2\text{CHO} + \text{NO}_3 \rightarrow \text{HOCH}_2\text{CO} + \text{HNO}_3$                                                                    | KN03AL                                         | Rickard and Pascoe (2009)                                                     |
| G42027a | TrGC   | $\text{HOCH}_2\text{CO}_3 \rightarrow \text{HCHO} + \text{CO}_2 + \text{HO}_2$                                                                               | $k1\_R02RC03*0.9$                              | Taraborrelli (2016)                                                           |
| G42027b | TrGC   | $\text{HOCH}_2\text{CO}_3 \rightarrow \text{HOCH}_2\text{CO}_2\text{H}$                                                                                      | $k1\_R02RC03*0.1$                              | Taraborrelli (2016)                                                           |
| G42028a | TrGC   | $\text{HOCH}_2\text{CO}_3 + \text{HO}_2 \rightarrow \text{HCHO} + \text{HO}_2 + \text{OH} + \text{CO}_2$                                                     | KAPH02*rc03_oh                                 | Taraborrelli (2016), Groß et al. (2014)                                       |
| G42028b | TrGC   | $\text{HOCH}_2\text{CO}_3 + \text{HO}_2 \rightarrow \text{HOCH}_2\text{CO}_3\text{H}$                                                                        | KAPH02*rc03_ooH                                | Taraborrelli (2016), Groß et al. (2014)                                       |
| G42028c | TrGC   | $\text{HOCH}_2\text{CO}_3 + \text{HO}_2 \rightarrow \text{HOCH}_2\text{CO}_2\text{H} + \text{O}_3$                                                           | KAPH02*rc03_o3                                 | Taraborrelli (2016), Groß et al. (2014)                                       |
| G42029  | TrGCN  | $\text{HOCH}_2\text{CO}_3 + \text{NO} \rightarrow \text{NO}_2 + \text{HO}_2 + \text{HCHO} + \text{CO}_2$                                                     | KAPNO                                          | Rickard and Pascoe (2009)                                                     |
| G42030  | TrGCN  | $\text{HOCH}_2\text{CO}_3 + \text{NO}_2 \rightarrow \text{PHAN}$                                                                                             | $k\_CH3C03\_NO2$                               | Rickard and Pascoe (2009)                                                     |
| G42031  | TrGCN  | $\text{HOCH}_2\text{CO}_3 + \text{NO}_3 \rightarrow \text{NO}_2 + \text{HO}_2 + \text{HCHO} + \text{CO}_2$                                                   | KR02N03*1.60                                   | Rickard and Pascoe (2009)                                                     |
| G42032  | TrGC   | $\text{HOCH}_2\text{CO}_2\text{H} + \text{OH} \rightarrow .09 \text{HCHO} + .09 \text{CO}_2 + .91 \text{HCOCO}_2\text{H} + \text{HO}_2 + \text{H}_2\text{O}$ | $k\_co2h+k\_s*f\_soh*f\_co2h$                  | Taraborrelli (2016)                                                           |
| G42033a | TrGC   | $\text{HOCH}_2\text{CO}_3\text{H} + \text{OH} \rightarrow \text{HOCH}_2\text{CO}_3 + \text{H}_2\text{O}$                                                     | $0.6*k\_CH300H\_OH$                            | Taraborrelli (2016)                                                           |
| G42033b | TrGC   | $\text{HOCH}_2\text{CO}_3\text{H} + \text{OH} \rightarrow \text{HCOCO}_3\text{H} + \text{HO}_2$                                                              | $k\_s*f\_soh*f\_co2h$                          | Taraborrelli (2016)                                                           |
| G42034  | TrGCN  | $\text{PHAN} \rightarrow \text{HOCH}_2\text{CO}_3 + \text{NO}_2$                                                                                             | $k\_PAN\_M$                                    | Rickard and Pascoe (2009)                                                     |
| G42035  | TrGCN  | $\text{PHAN} + \text{OH} \rightarrow \text{HCHO} + \text{CO} + \text{NO}_2 + \text{H}_2\text{O}$                                                             | $k\_s*f\_soh*f\_cpan+k\_rohro$                 | Taraborrelli (2016)                                                           |
| G42036  | TrGC   | $\text{GLYOX} + \text{OH} \rightarrow \text{HCOCO} + \text{H}_2\text{O}$                                                                                     | $3.1E-12*EXP(340./temp)$                       | Atkinson et al. (2006), Orlando and Tyndall (2001), Lockhart et al. (2013)    |
| G42037  | TrGCN  | $\text{GLYOX} + \text{NO}_3 \rightarrow \text{HCOCO} + \text{HNO}_3$                                                                                         | KN03AL                                         | Rickard and Pascoe (2009)                                                     |
| G42038a | TrGC   | $\text{HCOCO} \rightarrow \text{CO} + \text{CO} + \text{HO}_2$                                                                                               | $7.E11*EXP(-3160./temp) + 5.E-12*c(ind\_02)$   | Orlando and Tyndall (2001), Lockhart et al. (2013), Rickard and Pascoe (2009) |
| G42037b | TrGC   | $\text{HCOCO} \rightarrow \text{HCOCO}_3$                                                                                                                    | $5.E-12*c(ind\_02)*3.2*exp(-550./temp)$        | Lockhart et al. (2013), Rickard and Pascoe (2009)                             |
| G42037c | TrGC   | $\text{HCOCO} \rightarrow \text{OH} + \text{CO} + \text{CO}_2$                                                                                               | $5.E-12*c(ind\_02) * (1.-3.2*exp(-550./temp))$ | Lockhart et al. (2013), Rickard and Pascoe (2009)                             |
| G42039a | TrGC   | $\text{HCOCO}_3 \rightarrow \text{CO} + \text{HO}_2 + \text{CO}_2$                                                                                           | $k1\_R02RC03*0.9$                              | Taraborrelli (2016)                                                           |
| G42039b | TrGC   | $\text{HCOCO}_3 \rightarrow \text{HCOCO}_2\text{H}$                                                                                                          | $k1\_R02RC03*0.1$                              | Taraborrelli (2016)                                                           |
| G42040  | TrGC   | $\text{HCOCO}_3 + \text{HO}_2 \rightarrow \text{HO}_2 + \text{CO} + \text{CO}_2 + \text{OH}$                                                                 | KAPH02                                         | Feierabend et al. (2008), Taraborrelli (2016)                                 |
| G42041  | TrGCN  | $\text{HCOCO}_3 + \text{NO} \rightarrow \text{HO}_2 + \text{CO} + \text{NO}_2 + \text{CO}_2$                                                                 | KAPNO                                          | Rickard and Pascoe (2009)                                                     |

Table 1: Gas phase reactions (... continued)

| #       | labels | reaction                                                                                                                                                               | rate coefficient                               | reference                                         |
|---------|--------|------------------------------------------------------------------------------------------------------------------------------------------------------------------------|------------------------------------------------|---------------------------------------------------|
| G42042  | TrGCN  | $\text{HCOCO}_3 + \text{NO}_3 \rightarrow \text{HO}_2 + \text{CO} + \text{NO}_2 + \text{CO}_2$                                                                         | KR02N03*1.60                                   | Rickard and Pascoe (2009)                         |
| G42043  | TrGCN  | $\text{HCOCO}_3 + \text{NO}_2 \rightarrow \text{HO}_2 + \text{CO} + \text{NO}_3 + \text{CO}_2$                                                                         | k_CH3C03_N02                                   | Orlando and Tyndall (2001), Taraborrelli (2016)   |
| G42044  | TrGC   | $\text{HCOCO}_2\text{H} + \text{OH} \rightarrow \text{CO} + \text{HO}_2 + \text{CO}_2 + \text{H}_2\text{O}$                                                            | k_co2h+k_t*f_o*f_co2h                          | Taraborrelli (2016)                               |
| G42045a | TrGC   | $\text{HCOCO}_3\text{H} + \text{OH} \rightarrow \text{HCOCO}_3 + \text{H}_2\text{O}$                                                                                   | 0.6*k_CH300H_OH                                | Taraborrelli (2016)                               |
| G42045b | TrGC   | $\text{HCOCO}_3\text{H} + \text{OH} \rightarrow \text{CO} + \text{CO}_2 + \text{H}_2\text{O} + \text{OH}$                                                              | k_t*f_o*f_co2h                                 | Taraborrelli (2016)                               |
| G42046  | TrGC   | $\text{HOCH}_2\text{CH}_2\text{O}_2 \rightarrow .6 \text{HOCH}_2\text{CH}_2\text{O} + .2 \text{HOCH}_2\text{CHO} + .2 \text{ETHGLY}$                                   | 2.*(7.8E-14*EXP(1000./temp)*k_CH302)**(.5)*R02 | Atkinson et al. (2006), Rickard and Pascoe (2009) |
| G42047  | TrGCN  | $\text{HOCH}_2\text{CH}_2\text{O}_2 + \text{NO} \rightarrow .25 \text{HO}_2 + .5 \text{HCHO} + .75 \text{HOCH}_2\text{CH}_2\text{O} + \text{NO}_2$                     | KR02N0*(1.-alpha_AN(3,1,0,0,0,temp,cair))      | Rickard and Pascoe (2009)*                        |
| G42048  | TrGCN  | $\text{HOCH}_2\text{CH}_2\text{O}_2 + \text{NO} \rightarrow \text{ETHOHNO}_3$                                                                                          | KR02N0*alpha_AN(3,1,0,0,0,temp,cair)           | Taraborrelli (2016)                               |
| G42049a | TrGC   | $\text{HOCH}_2\text{CH}_2\text{O}_2 + \text{HO}_2 \rightarrow \text{HYETHO}_2\text{H}$                                                                                 | 1.53E-13*EXP(1300./temp)*(1.-rchohch2o2_oh)    | Rickard and Pascoe (2009)                         |
| G42049b | TrGC   | $\text{HOCH}_2\text{CH}_2\text{O}_2 + \text{HO}_2 \rightarrow \text{HOCH}_2\text{CH}_2\text{O} + \text{OH}$                                                            | 1.53E-13*EXP(1300./temp)*rchohch2o2_oh         | Rickard and Pascoe (2009)                         |
| G42050  | TrGCN  | $\text{ETHOHNO}_3 + \text{OH} \rightarrow .93 \text{NO}_3\text{CH}_2\text{CHO} + .93 \text{HO}_2 + .07 \text{HOCH}_2\text{CHO} + .07 \text{NO}_2 + \text{H}_2\text{O}$ | k_s*(f_soh*f_ch2ono2+f_ono2*f_pch2oh)+k_rohro  | Taraborrelli (2016)                               |
| G42051a | TrGC   | $\text{HYETHO}_2\text{H} + \text{OH} \rightarrow \text{HOCH}_2\text{CH}_2\text{O}_2 + \text{H}_2\text{O}$                                                              | 0.6*k_CH300H_OH                                | Rickard and Pascoe (2009)*                        |
| G42051b | TrGC   | $\text{HYETHO}_2\text{H} + \text{OH} \rightarrow \text{HOCH}_2\text{CHO} + \text{OH} + \text{H}_2\text{O}$                                                             | k_s*f_soh*f_pch2oh                             | Taraborrelli (2016)                               |
| G42051c | TrGC   | $\text{HYETHO}_2\text{H} + \text{OH} \rightarrow \text{HOOCH}_2\text{CHO} + \text{HO}_2 + \text{H}_2\text{O}$                                                          | k_s*f_soh*f_pch2oh+k_rohro                     | Taraborrelli (2016)                               |
| G42052a | TrGC   | $\text{HOCH}_2\text{CH}_2\text{O} \rightarrow \text{HO}_2 + \text{HOCH}_2\text{CHO}$                                                                                   | 6.00E-14*EXP(-550./temp)*C(ind_02)             | Rickard and Pascoe (2009)                         |
| G42052b | TrGC   | $\text{HOCH}_2\text{CH}_2\text{O} \rightarrow \text{HO}_2 + \text{HCHO} + \text{HCHO}$                                                                                 | 9.50E13*EXP(-5988./temp)                       | Rickard and Pascoe (2009)                         |
| G42053  | TrGC   | $\text{ETHGLY} + \text{OH} \rightarrow \text{HOCH}_2\text{CHO} + \text{HO}_2 + \text{H}_2\text{O}$                                                                     | 2*k_s*f_soh*f_pch2oh+2*k_rohro                 | Taraborrelli (2016)                               |
| G42054  | TrGC   | $\text{HCOCH}_2\text{O}_2 \rightarrow .6 \text{HCHO} + .6 \text{CO} + .6 \text{HO}_2 + .2 \text{GLYOX} + .2 \text{HOCH}_2\text{CHO}$                                   | k1_R02p0R02                                    | Taraborrelli (2016)                               |
| G42055a | TrGC   | $\text{HCOCH}_2\text{O}_2 + \text{HO}_2 \rightarrow \text{HOOCH}_2\text{CHO}$                                                                                          | KR02H02(2)*rcoch2o2_ooH                        | Taraborrelli (2016)                               |
| G42055b | TrGC   | $\text{HCOCH}_2\text{O}_2 + \text{HO}_2 \rightarrow \text{HCHO} + \text{CO} + \text{HO}_2 + \text{OH}$                                                                 | KR02H02(2)*rcoch2o2_oh                         | Taraborrelli (2016)                               |
| G42056a | TrGCN  | $\text{HCOCH}_2\text{O}_2 + \text{NO} \rightarrow \text{NO}_2 + \text{HCHO} + \text{CO} + \text{HO}_2$                                                                 | KR02N0*(1.-alpha_AN(3,1,1,0,0,temp,cair))      | Taraborrelli (2016)                               |
| G42056b | TrGCN  | $\text{HCOCH}_2\text{O}_2 + \text{NO} \rightarrow \text{NO}_3\text{CH}_2\text{CHO}$                                                                                    | KR02N0*alpha_AN(3,1,1,0,0,temp,cair)           | Taraborrelli (2016)                               |
| G42057  | TrGCN  | $\text{HCOCH}_2\text{O}_2 + \text{NO}_3 \rightarrow \text{HCHO} + \text{CO} + \text{HO}_2 + \text{NO}_2$                                                               | KR02N03                                        | Taraborrelli (2016)                               |
| G42058a | TrGC   | $\text{HOOCH}_2\text{CHO} + \text{OH} \rightarrow \text{HCOCH}_2\text{O}_2$                                                                                            | 0.6*k_CH300H_OH                                | Taraborrelli (2016)                               |

Table 1: Gas phase reactions (... continued)

| #       | labels | reaction                                                                                                                                                         | rate coefficient                                                      | reference                                   |
|---------|--------|------------------------------------------------------------------------------------------------------------------------------------------------------------------|-----------------------------------------------------------------------|---------------------------------------------|
| G42058b | TrGC   | $\text{HOOCH}_2\text{CHO} + \text{OH} \rightarrow \text{HCHO} + \text{CO} + \text{OH}$                                                                           | .8*8.E-12                                                             | Taraborrelli (2016)*                        |
| G42058c | TrGC   | $\text{HOOCH}_2\text{CHO} + \text{OH} \rightarrow \text{GLYOX} + \text{OH}$                                                                                      | k_sf_sooch*f_cho                                                      | Taraborrelli (2016)                         |
| G42059  | TrGCN  | $\text{HOOCH}_2\text{CHO} + \text{NO}_3 \rightarrow \text{OH} + \text{HCHO} + \text{CO} + \text{HNO}_3$                                                          | KN03AL                                                                | Rickard and Pascoe (2009)                   |
| G42060  | TrGCN  | $\text{HOOCH}_2\text{CO}_3 + \text{NO} \rightarrow \text{NO}_2 + \text{OH} + \text{HCHO} + \text{CO}_2$                                                          | KAPNO                                                                 | Taraborrelli (2016)                         |
| G42061  | TrGCN  | $\text{HOOCH}_2\text{CO}_3 + \text{NO}_3 \rightarrow \text{NO}_2 + \text{OH} + \text{HCHO} + \text{CO}_2$                                                        | KR02NO3*1.60                                                          | Taraborrelli (2016)                         |
| G42062a | TrGC   | $\text{HOOCH}_2\text{CO}_3 + \text{HO}_2 \rightarrow 2 \text{OH} + \text{HCHO} + \text{CO}_2$                                                                    | KAPH02*rco3_oh                                                        | Taraborrelli (2016)                         |
| G42062b | TrGC   | $\text{HOOCH}_2\text{CO}_3 + \text{HO}_2 \rightarrow \text{HOOCH}_2\text{CO}_3\text{H}$                                                                          | KAPH02*rco3_ooh                                                       | Taraborrelli (2016)                         |
| G42062c | TrGC   | $\text{HOOCH}_2\text{CO}_3 + \text{HO}_2 \rightarrow \text{HOOCH}_2\text{CO}_2\text{H} + \text{O}_3$                                                             | KAPH02*rco3_o3                                                        | Taraborrelli (2016)                         |
| G42063a | TrGC   | $\text{HOOCH}_2\text{CO}_3 \rightarrow \text{OH} + \text{HCHO} + \text{CO}_2$                                                                                    | k1_R02RC03*0.9                                                        | Taraborrelli (2016)                         |
| G42063b | TrGC   | $\text{HOOCH}_2\text{CO}_3 \rightarrow \text{HOOCH}_2\text{CO}_2\text{H}$                                                                                        | k1_R02RC03*0.1                                                        | Taraborrelli (2016)                         |
| G42064a | TrGC   | $\text{HOOCH}_2\text{CO}_3\text{H} + \text{OH} \rightarrow \text{HOOCH}_2\text{CO}_3 + \text{H}_2\text{O}$                                                       | 2.*0.6*k_CH300H_OH                                                    | Taraborrelli (2016)                         |
| G42064b | TrGC   | $\text{HOOCH}_2\text{CO}_3\text{H} + \text{OH} \rightarrow \text{HCOCO}_2\text{H} + \text{OH} + \text{H}_2\text{O}$                                              | k_sf_sooch*f_co2h                                                     | Taraborrelli (2016)                         |
| G42065  | TrGC   | $\text{HOOCH}_2\text{CO}_2\text{H} + \text{OH} \rightarrow \text{HCOCO}_2\text{H} + \text{OH} + \text{H}_2\text{O}$                                              | k_sf_sooch*f_co2h+k_co2h                                              | Taraborrelli (2016)                         |
| G42066  | TrGC   | $\text{CH}_2\text{CO} + \text{OH} \rightarrow .6 \text{HCHO} + .6 \text{HO}_2 + .6 \text{CO} + .4 \text{HOOCH}_2\text{CO}_2\text{H}$                             | 2.8E-12*exp(510./temp)                                                | Baulch et al. (2005), Taraborrelli (2016)   |
| G42067a | TrGC   | $\text{CH}_3\text{CHOHOOH} + \text{OH} \rightarrow \text{CH}_3\text{COOH} + \text{OH}$                                                                           | (k_t*f_tooh*f_toh + k_rohro)                                          | Taraborrelli (2016)                         |
| G42067b | TrGC   | $\text{CH}_3\text{CHOHOOH} + \text{OH} \rightarrow \text{CH}_3\text{CHOHO}_2$                                                                                    | 0.6*k_CH300H_OH                                                       | Taraborrelli (2016)                         |
| G42068  | TrGC   | $\text{CH}_3\text{CHOHO}_2 \rightarrow \text{CH}_3\text{CHO} + \text{HO}_2$                                                                                      | 3.46E12*EXP(-12500./(1.98*temp))                                      | Hermans et al. (2005), Taraborrelli (2016)  |
| G42069  | TrGC   | $\text{CH}_3\text{CHO} + \text{HO}_2 \rightarrow \text{CH}_3\text{CHOHO}_2$                                                                                      | 3.46E12*EXP(-12500./(1.98*temp)) / (6.34E26*EXP(-14700./(1.98*temp))) | Hermans et al. (2005), Taraborrelli (2016)  |
| G42070  | TrGC   | $\text{CH}_3\text{CHOHO}_2 + \text{HO}_2 \rightarrow .5 \text{CH}_3\text{CHOHOOH} + .3 \text{CH}_3\text{COOH} + .2 \text{CH}_3 + .2 \text{HCOOH} + .2 \text{OH}$ | 5.6E-15*EXP(2300./temp)                                               | Taraborrelli (2016)                         |
| G42071  | TrGC   | $\text{CH}_3\text{CHOHO}_2 \rightarrow \text{CH}_3 + \text{HCOOH} + \text{OH}$                                                                                   | k1_R02s0R02                                                           | Taraborrelli (2016)                         |
| G42072  | TrGCN  | $\text{CH}_3\text{CHOHO}_2 + \text{NO} \rightarrow \text{CH}_3 + \text{HCOOH} + \text{OH} + \text{NO}_2$                                                         | KR02NO                                                                | Taraborrelli (2016)                         |
| G42073  | TrGCN  | $\text{C}_2\text{H}_5\text{ONO}_2 + \text{OH} \rightarrow \text{CH}_3\text{CHO} + \text{H}_2\text{O} + \text{NO}_2$                                              | 6.7E-13*EXP(-395./temp)                                               | Atkinson et al. (2006)                      |
| G42074a | TrGCN  | $\text{NO}_3\text{CH}_2\text{CHO} + \text{OH} \rightarrow \text{GLYOX} + \text{NO}_2 + \text{H}_2\text{O}$                                                       | k_sf_ch2ono2*f_cho                                                    | Paulot et al. (2009a), Taraborrelli (2016)* |
| G42074b | TrGCN  | $\text{NO}_3\text{CH}_2\text{CHO} + \text{OH} \rightarrow \text{NO}_3\text{CH}_2\text{CO}_3 + \text{H}_2\text{O}$                                                | k_t*f_o*f_ch2ono2*3.                                                  | Paulot et al. (2009a), Taraborrelli (2016)* |
| G42075  | TrGCN  | $\text{NO}_3\text{CH}_2\text{CO}_3 + \text{HO}_2 \rightarrow \text{HCHO} + \text{NO}_2 + \text{CO}_2 + \text{OH}$                                                | KAPH02                                                                | Rickard and Pascoe (2009)*                  |
| G42076  | TrGCN  | $\text{NO}_3\text{CH}_2\text{CO}_3 + \text{NO} \rightarrow \text{HCHO} + \text{NO}_2 + \text{CO}_2 + \text{NO}_2$                                                | KAPNO                                                                 | Rickard and Pascoe (2009)                   |
| G42077  | TrGCN  | $\text{NO}_3\text{CH}_2\text{CO}_3 + \text{NO}_2 \rightarrow \text{NO}_3\text{CH}_2\text{CHO}$                                                                   | k_CH3C03_NO2                                                          | Rickard and Pascoe (2009)                   |
| G42078  | TrGCN  | $\text{NO}_3\text{CH}_2\text{CO}_3 \rightarrow \text{HCHO} + \text{NO}_2 + \text{CO}_2$                                                                          | k1_R02RC03                                                            | Rickard and Pascoe (2009)*                  |

Table 1: Gas phase reactions (... continued)

| #       | labels  | reaction                                                                                                                                                                   | rate coefficient                                                                                               | reference                                         |
|---------|---------|----------------------------------------------------------------------------------------------------------------------------------------------------------------------------|----------------------------------------------------------------------------------------------------------------|---------------------------------------------------|
| G42079  | TrGCN   | $\text{NO}_3\text{CH}_2\text{CHO} \rightarrow \text{NO}_3\text{CH}_2\text{CO}_3 + \text{NO}_2$                                                                             | k_PAN_M                                                                                                        | Rickard and Pascoe (2009)                         |
| G42080  | StTrGCN | $\text{C}_2\text{H}_5\text{O}_2 + \text{NO}_2 \rightarrow \text{C}_2\text{H}_5\text{O}_2\text{NO}_2$                                                                       | k_3rd_iupac(temp, cair, 1.3E-29, 6.2, 8.8E-12, 0.0, 0.31)                                                      | Atkinson et al. (2006)                            |
| G42081  | StTrGCN | $\text{C}_2\text{H}_5\text{O}_2\text{NO}_2 \rightarrow \text{C}_2\text{H}_5\text{O}_2 + \text{NO}_2$                                                                       | k_3rd_iupac(temp, cair, REAL(4.8E-4*EXP(-9285./temp), SP), 0.0, REAL(8.8E15*EXP(-10440./temp), SP), 0.0, 0.31) | Atkinson et al. (2006)                            |
| G42082  | StTrGCN | $\text{C}_2\text{H}_5\text{O}_2\text{NO}_2 + \text{OH} \rightarrow \text{CH}_3\text{CHO} + \text{NO}_3 + \text{H}_2\text{O}$                                               | 9.50E-13*EXP(-650./temp)                                                                                       | Taraborrelli (2016)*                              |
| G42083a | TrGC    | $\text{CH}_3\text{C}(\text{O}) + \text{O}_2 \rightarrow \text{CH}_3\text{C}(\text{O})\text{OO}$                                                                            | 5.1E-12*(1. - 1./(1.+ 9.4E-18*cair))                                                                           | Atkinson et al. (2006), Beyersdorf et al. (2010)* |
| G42083b | TrGC    | $\text{CH}_3\text{C}(\text{O}) + \text{O}_2 \rightarrow \text{OH} + \text{HCHO} + \text{CO}$                                                                               | 5.1E-12*1./(1.+9.4E-18*cair)                                                                                   | Atkinson et al. (2006), Beyersdorf et al. (2010)* |
| G42084  | TrGC    | $\text{C}_2\text{H}_5\text{OH} + \text{OH} \rightarrow .95 \text{C}_2\text{H}_5\text{O}_2 + .95 \text{HO}_2 + .05 \text{HOCH}_2\text{CH}_2\text{O}_2 + \text{H}_2\text{O}$ | 3.0E-12*EXP(20./temp)                                                                                          | Taraborrelli (2016), Atkinson et al. (2006)       |
| G42085a | TrGCN   | $\text{CH}_3\text{CN} + \text{OH} \rightarrow \text{NCCH}_2\text{O}_2 + \text{H}_2\text{O}$                                                                                | 8.1E-13*EXP(-1080./temp)*0.40                                                                                  | Atkinson et al. (2006), Tyndall et al. (2001b)*   |
| G42085b | TrGCN   | $\text{CH}_3\text{CN} + \text{OH} \rightarrow \text{OH} + \text{CH}_3\text{C}(\text{O}) + \text{NO}$                                                                       | 8.1E-13*EXP(-1080./temp)*(1.-0.40)                                                                             | Atkinson et al. (2006), Tyndall et al. (2001b)*   |
| G42086a | TrGCN   | $\text{CH}_3\text{CN} + \text{O}(^1\text{D}) \rightarrow \text{O}(^3\text{P}) + \text{CH}_3\text{CN}$                                                                      | 2.54E-10*EXP(-24./temp)*0.0269*EXP(137./temp)                                                                  | Strekowski et al. (2010)                          |
| G42086b | TrGCN   | $\text{CH}_3\text{CN} + \text{O}(^1\text{D}) \rightarrow 2 \text{H} + \text{CO} + \text{HCN}$                                                                              | 2.54E-10*EXP(-24./temp)*0.16                                                                                   | Strekowski et al. (2010)*                         |
| G42086c | TrGCN   | $\text{CH}_3\text{CN} + \text{O}(^1\text{D}) \rightarrow .5 \text{CH}_3 + .5 \text{NCO} + .5 \text{NCCH}_2\text{O}_2 + .5 \text{OH}$                                       | 2.54E-10*EXP(-24./temp)*(1.-(0.16+ 0.0269*EXP(137./temp)))                                                     | Strekowski et al. (2010)*                         |
| G42087  | TrGCN   | $\text{NCCH}_2\text{O}_2 + \text{NO} \rightarrow \text{HCN} + \text{CO}_2 + \text{HO}_2 + \text{NO}_2$                                                                     | KR02NO                                                                                                         | see note*                                         |
| G42088  | TrGCN   | $\text{NCCH}_2\text{O}_2 + \text{HO}_2 \rightarrow \text{HCN} + \text{CO}_2 + \text{HO}_2$                                                                                 | KR02HO2(2)                                                                                                     | see note*                                         |
| G42089a | TrGC    | $\text{CH}_2\text{CHOH} + \text{OH} \rightarrow \text{HCOOH} + \text{OH} + \text{HCHO}$                                                                                    | k_CH2CHOH_OH_HCOOH                                                                                             | Taraborrelli (2016), So et al. (2014)*            |
| G42089b | TrGC    | $\text{CH}_2\text{CHOH} + \text{OH} \rightarrow \text{HOCH}_2\text{CHO} + \text{HO}_2$                                                                                     | k_CH2CHOH_OH_ALD                                                                                               | Taraborrelli (2016), So et al. (2014)             |
| G42090  | TrGC    | $\text{CH}_2\text{CHOH} + \text{HCOOH} \rightarrow \text{CH}_3\text{CHO} + \text{HCOOH}$                                                                                   | k_CH2CHOH_HCOOH                                                                                                | Taraborrelli (2016), daSilva (2010)*              |
| G42091  | TrGC    | $\text{CH}_3\text{CHO} + \text{HCOOH} \rightarrow \text{CH}_2\text{CHOH} + \text{HCOOH}$                                                                                   | k_ALD_HCOOH                                                                                                    | Taraborrelli (2016), daSilva (2010)*              |
| G43000a | TrGC    | $\text{C}_3\text{H}_8 + \text{OH} \rightarrow \text{iC}_3\text{H}_7\text{O}_2 + \text{H}_2\text{O}$                                                                        | k_s                                                                                                            | Taraborrelli (2016)                               |
| G43000b | TrGC    | $\text{C}_3\text{H}_8 + \text{OH} \rightarrow \text{C}_3\text{H}_7\text{O}_2 + \text{H}_2\text{O}$                                                                         | 2.*k_p                                                                                                         | Taraborrelli (2016)                               |

Table 1: Gas phase reactions (... continued)

| #       | labels | reaction                                                                                                                           | rate coefficient                                                   | reference                                         |
|---------|--------|------------------------------------------------------------------------------------------------------------------------------------|--------------------------------------------------------------------|---------------------------------------------------|
| G43001a | TrGC   | $C_3H_6 + O_3 \rightarrow HCHO + .16 CH_3CHOHO_2 + .50 OH + .50 HCOCH_2O_2 + .05 CH_2CO + .09 CH_3OH + .09 CO + .2 CH_4 + .2 CO_2$ | $5.5E-15*EXP(-1880./temp)*.57$                                     | Atkinson et al. (2006)*                           |
| G43001b | TrGC   | $C_3H_6 + O_3 \rightarrow CH_3CHO + CH_2OO^*$                                                                                      | $5.5E-15*EXP(-1880./temp)*.43$                                     | Atkinson et al. (2006)*                           |
| G43002  | TrGC   | $C_3H_6 + OH \rightarrow HYPROPO_2$                                                                                                | $k\_3rd\_iupac(temp, cair, 8.6E-27, 3.5, 3.E-11, 1., 0.5)$         | Atkinson et al. (2006), Rickard and Pascoe (2009) |
| G43003  | TrGCN  | $C_3H_6 + NO_3 \rightarrow PRONO_3BO_2$                                                                                            | $4.6E-13*EXP(-1155./temp)$                                         | Wallington et al.                                 |
| G43004  | TrGC   | $iC_3H_7O_2 + HO_2 \rightarrow iC_3H_7OOH$                                                                                         | $1.9E-13*EXP(1300./temp)$                                          | Atkinson (1997)*                                  |
| G43005a | TrGCN  | $iC_3H_7O_2 + NO \rightarrow CH_3COCH_3 + HO_2 + NO_2$                                                                             | $2.7E-12*EXP(360./temp)*(1.-alpha\_AN(3, 2, 0, 0, 0, temp, cair))$ | Wallington et al.                                 |
| G43005b | TrGCN  | $iC_3H_7O_2 + NO \rightarrow iC_3H_7ONO_2$                                                                                         | $2.7E-12*EXP(360./temp)*alpha\_AN(3, 2, 0, 0, 0, temp, cair)$      | Wallington et al.                                 |
| G43006  | TrGC   | $iC_3H_7O_2 \rightarrow .8 CH_3COCH_3 + .2 IPROPOL + .6 HO_2$                                                                      | $2.*(1.6E-12*EXP(-2200./temp)*k\_CH3O2)**(.5)*R02$                 | Rickard and Pascoe (2009), Atkinson et al. (2006) |
| G43007a | TrGC   | $iC_3H_7OOH + OH \rightarrow iC_3H_7O_2 + H_2O$                                                                                    | $0.6*k\_CH300H\_OH$                                                | Taraborrelli (2016)                               |
| G43007b | TrGC   | $iC_3H_7OOH + OH \rightarrow CH_3COCH_3 + H_2O + OH$                                                                               | $k\_t*f\_tooh$                                                     | Taraborrelli (2016)                               |
| G43008  | TrGC   | $C_3H_7O_2 + HO_2 \rightarrow C_3H_7OOH$                                                                                           | $1.9E-13*EXP(1300./temp)$                                          | Atkinson (1997)*                                  |
| G43009a | TrGCN  | $C_3H_7O_2 + NO \rightarrow C_2H_5CHO + HO_2 + NO_2$                                                                               | $2.7E-12*EXP(360./temp)*(1.-alpha\_AN(3, 1, 0, 0, 0, temp, cair))$ | Wallington et al.                                 |
| G43009b | TrGCN  | $C_3H_7O_2 + NO \rightarrow C_3H_7ONO_2$                                                                                           | $2.7E-12*EXP(360./temp)*alpha\_AN(3, 1, 0, 0, 0, temp, cair)$      | Wallington et al.                                 |
| G43010  | TrGC   | $C_3H_7O_2 \rightarrow .8 CH_3COCH_3 + .2 NPROPOL + .6 HO_2$                                                                       | $2.*(k\_CH3O2*3.E-13)**(.5)*R02$                                   | Rickard and Pascoe (2009), Atkinson et al. (2006) |
| G43011  | TrGC   | $CH_3COCH_3 + OH \rightarrow CH_3COCH_2O_2 + H_2O$                                                                                 | $(8.8E-12*EXP(-1320./temp) + 1.7E-14*EXP(423./temp))$              | Atkinson et al. (2006)*                           |
| G43012a | TrGC   | $CH_3COCH_2O_2 + HO_2 \rightarrow CH_3COCH_2O_2H$                                                                                  | $8.6E-13*EXP(700./temp)*rcoch2o2\_ooh$                             | Tyndall et al. (2001a), Taraborrelli (2016)       |
| G43012b | TrGC   | $CH_3COCH_2O_2 + HO_2 \rightarrow OH + CH_3C(O) + HCHO$                                                                            | $8.6E-13*EXP(700./temp)*rcoch2o2\_oh$                              | Tyndall et al. (2001a), Taraborrelli (2016)       |
| G43013a | TrGCN  | $CH_3COCH_2O_2 + NO \rightarrow CH_3C(O) + HCHO + NO_2$                                                                            | $2.9E-12*EXP(300./temp)*(1.-alpha\_AN(4, 1, 1, 0, 0, temp, cair))$ | Sander et al. (2011)                              |
| G43013b | TrGCN  | $CH_3COCH_2O_2 + NO \rightarrow NOA$                                                                                               | $2.9E-12*EXP(300./temp)*alpha\_AN(4, 1, 1, 0, 0, temp, cair)$      | Sander et al. (2011)                              |
| G43014  | TrGC   | $CH_3COCH_2O_2 \rightarrow .3 CH_3C(O) + .3 HCHO + .5 MGLYOX + .2 CH_3COCH_2OH$                                                    | $k1\_R02pR02$                                                      | Orlando and Tyndall (2012)                        |

Table 1: Gas phase reactions (... continued)

| #       | labels | reaction                                                                                                                                           | rate coefficient                                                                    | reference                                             |
|---------|--------|----------------------------------------------------------------------------------------------------------------------------------------------------|-------------------------------------------------------------------------------------|-------------------------------------------------------|
| G43015a | TrGC   | $\text{CH}_3\text{COCH}_2\text{O}_2\text{H} + \text{OH} \rightarrow \text{CH}_3\text{COCH}_2\text{O}_2 + \text{H}_2\text{O}$                       | $0.6 \cdot k_{\text{CH300H\_OH}}$                                                   | see note*                                             |
| G43015b | TrGC   | $\text{CH}_3\text{COCH}_2\text{O}_2\text{H} + \text{OH} \rightarrow \text{MGLYOX} + \text{OH} + \text{H}_2\text{O}$                                | $k_{\text{s* f\_sooh* f\_co}}$                                                      | Taraborrelli (2016)                                   |
| G43016  | TrGC   | $\text{CH}_3\text{COCH}_2\text{OH} + \text{OH} \rightarrow \text{MGLYOX} + \text{HO}_2 + \text{H}_2\text{O}$                                       | $1.6\text{E-}12 \cdot \text{EXP}(305./\text{temp})$                                 | Atkinson et al. (2006)                                |
| G43017  | TrGC   | $\text{MGLYOX} + \text{OH} \rightarrow .4 \text{ CH}_3 + .6 \text{ CH}_3\text{C}(\text{O}) + 1.4 \text{ CO} + \text{H}_2\text{O}$                  | $1.9\text{E-}12 \cdot \text{EXP}(575./\text{temp})$                                 | Baeza-Romero et al. (2007),<br>Atkinson et al. (2006) |
| G43020  | TrGCN  | $\text{iC}_3\text{H}_7\text{ONO}_2 + \text{OH} \rightarrow \text{CH}_3\text{COCH}_3 + \text{NO}_2$                                                 | $6.2\text{E-}13 \cdot \text{EXP}(-230./\text{temp})$                                | Wallington et al.                                     |
| G43021  | TrGCN  | $\text{CH}_3\text{COCH}_2\text{O}_2 + \text{NO}_3 \rightarrow \text{CH}_3\text{C}(\text{O}) + \text{HCHO} + \text{NO}_2$                           | KR02N03                                                                             | Rickard and Pascoe (2009)                             |
| G43022  | TrGC   | $\text{HYPROPO}_2 \rightarrow \text{CH}_3\text{CHO} + \text{HCHO} + \text{HO}_2$                                                                   | k1_R02s0R02                                                                         | Rickard and Pascoe (2009)                             |
| G43023a | TrGC   | $\text{HYPROPO}_2 + \text{HO}_2 \rightarrow \text{HYPROPO}_2\text{H}$                                                                              | $\text{KR02H02}(3) \cdot (1.-\text{rchohch2o2\_oh})$                                | Rickard and Pascoe (2009)                             |
| G43023b | TrGC   | $\text{HYPROPO}_2 + \text{HO}_2 \rightarrow \text{CH}_3\text{CHO} + \text{HCHO} + \text{HO}_2 + \text{OH}$                                         | $\text{KR02H02}(3) \cdot \text{rchohch2o2\_oh}$                                     | Rickard and Pascoe (2009)                             |
| G43024a | TrGCN  | $\text{HYPROPO}_2 + \text{NO} \rightarrow \text{CH}_3\text{CHO} + \text{HCHO} + \text{HO}_2 + \text{NO}_2$                                         | $\text{KR02N0} \cdot (1.-\text{alpha\_AN}(4,1,0,0,0, \text{temp, cair}))$           | Rickard and Pascoe (2009)                             |
| G43024b | TrGCN  | $\text{HYPROPO}_2 + \text{NO} \rightarrow \text{PROPOLNO}_3$                                                                                       | $\text{KR02N0} \cdot \text{alpha\_AN}(4,1,0,0,0, \text{temp, cair})$                | Rickard and Pascoe (2009)                             |
| G43025  | TrGCN  | $\text{HYPROPO}_2 + \text{NO}_3 \rightarrow \text{CH}_3\text{CHO} + \text{HCHO} + \text{HO}_2 + \text{NO}_2$                                       | KR02N03                                                                             | Rickard and Pascoe (2009)                             |
| G43026a | TrGC   | $\text{HYPROPO}_2\text{H} + \text{OH} \rightarrow \text{HYPROPO}_2$                                                                                | $0.6 \cdot k_{\text{CH300H\_OH}}$                                                   | Rickard and Pascoe (2009)                             |
| G43026b | TrGC   | $\text{HYPROPO}_2\text{H} + \text{OH} \rightarrow \text{CH}_3\text{COCH}_2\text{OH} + \text{OH}$                                                   | $(k_{\text{s* f\_soh* f\_pch2oh} + k_{\text{t* f\_tooh* f\_pch2oh}})$               | Taraborrelli (2016)                                   |
| G43027  | TrGCN  | $\text{PRONO}_3\text{BO}_2 + \text{HO}_2 \rightarrow \text{PR}_2\text{O}_2\text{HNO}_3$                                                            | KR02H02(3)                                                                          | Rickard and Pascoe (2009)                             |
| G43028  | TrGCN  | $\text{PRONO}_3\text{BO}_2 + \text{NO} \rightarrow \text{NOA} + \text{HO}_2 + \text{NO}_2$                                                         | KR02N0                                                                              | Rickard and Pascoe (2009)*                            |
| G43029  | TrGCN  | $\text{PRONO}_3\text{BO}_2 + \text{NO}_3 \rightarrow \text{NOA} + \text{HO}_2 + \text{NO}_2$                                                       | KR02N03                                                                             | Rickard and Pascoe (2009)                             |
| G43030a | TrGCN  | $\text{PR}_2\text{O}_2\text{HNO}_3 + \text{OH} \rightarrow \text{PRONO}_3\text{BO}_2$                                                              | $0.6 \cdot k_{\text{CH300H\_OH}}$                                                   | Rickard and Pascoe (2009)                             |
| G43030b | TrGCN  | $\text{PR}_2\text{O}_2\text{HNO}_3 + \text{OH} \rightarrow \text{NOA} + \text{OH}$                                                                 | $k_{\text{t* f\_tooh* f\_ch2ono2}}$                                                 | Taraborrelli (2016)                                   |
| G43031  | TrGCN  | $\text{MGLYOX} + \text{NO}_3 \rightarrow \text{CH}_3\text{C}(\text{O}) + \text{CO} + \text{HNO}_3$                                                 | KN03AL*2.4                                                                          | Rickard and Pascoe (2009)                             |
| G43032  | TrGCN  | $\text{NOA} + \text{OH} \rightarrow \text{MGLYOX} + \text{NO}_2$                                                                                   | $(k_{\text{s* f\_co* f\_ono2} + k_{\text{p* f\_co}})$                               | Taraborrelli (2016)                                   |
| G43033  | TrGC   | $\text{HOCH}_2\text{COCHO} + \text{OH} \rightarrow .8609 \text{ HOCH}_2\text{CO} + .8609 \text{ CO} + .1391 \text{ HCOCOCHO} + .1391 \text{ HO}_2$ | $(1.9\text{E-}12 \cdot \text{EXP}(575./\text{temp}) + k_{\text{s* f\_soh* f\_co}})$ | Taraborrelli (2016)                                   |
| G43034  | TrGCN  | $\text{HOCH}_2\text{COCHO} + \text{NO}_3 \rightarrow \text{HOCH}_2\text{CO} + \text{CO} + \text{HNO}_3$                                            | KN03AL*2.4                                                                          | Taraborrelli (2016)                                   |
| G43035  | TrGC   | $\text{CH}_3\text{COCO}_2\text{H} + \text{OH} \rightarrow \text{CH}_3\text{C}(\text{O}) + \text{H}_2\text{O} + \text{CO}_2$                        | $4.9\text{E-}14 \cdot \text{EXP}(276./\text{temp})$                                 | Mellouki and Mu (2003),<br>Taraborrelli (2016)        |
| G43036  | TrGC   | $\text{HCOCOCH}_2\text{O}_2 \rightarrow .6 \text{ HCOCO} + .6 \text{ HCHO} + .2 \text{ HCOCOCHO} + .2 \text{ HOCH}_2\text{COCHO}$                  | k1_R02p0R02                                                                         | Taraborrelli (2016)                                   |
| G43037  | TrGCN  | $\text{HCOCOCH}_2\text{O}_2 + \text{NO} \rightarrow \text{HCOCO} + \text{HCHO} + \text{NO}_2$                                                      | KR02N0                                                                              | Taraborrelli (2016)*                                  |
| G43038a | TrGC   | $\text{HCOCOCH}_2\text{O}_2 + \text{HO}_2 \rightarrow \text{HCOCOCH}_2\text{OOH}$                                                                  | $\text{KR02H02}(3) \cdot \text{rcoch2o2\_ooh}$                                      | Taraborrelli (2016)                                   |
| G43038b | TrGC   | $\text{HCOCOCH}_2\text{O}_2 + \text{HO}_2 \rightarrow \text{HCOCO} + \text{HCHO} + \text{OH}$                                                      | $\text{KR02H02}(3) \cdot \text{rcoch2o2\_oh}$                                       | Taraborrelli (2016)                                   |

Table 1: Gas phase reactions (... continued)

| #       | labels | reaction                                                                                                                                                                                                            | rate coefficient                                              | reference                                        |
|---------|--------|---------------------------------------------------------------------------------------------------------------------------------------------------------------------------------------------------------------------|---------------------------------------------------------------|--------------------------------------------------|
| G43039  | TrGCN  | $\text{HCOCOCH}_2\text{O}_2 + \text{NO}_3 \rightarrow \text{HCOCO} + \text{HCHO} + \text{NO}_2$                                                                                                                     | KR02N03                                                       | Taraborrelli (2016)                              |
| G43040a | TrGC   | $\text{HCOCOCH}_2\text{OOH} + \text{OH} \rightarrow \text{HOOCH}_2\text{CO}_3 + \text{CO} + \text{H}_2\text{O}$                                                                                                     | $k_{\text{t*ff\_co*ff\_o}}$                                   | Taraborrelli (2016)*                             |
| G43040b | TrGC   | $\text{HCOCOCH}_2\text{OOH} + \text{OH} \rightarrow \text{HCOCOCHO} + \text{H}_2\text{O} + \text{OH}$                                                                                                               | $k_{\text{s*ff\_sooh*ff\_co}}$                                | Taraborrelli (2016)*                             |
| G43040c | TrGC   | $\text{HCOCOCH}_2\text{OOH} + \text{OH} \rightarrow \text{HCOCOCH}_2\text{O}_2 + \text{H}_2\text{O}$                                                                                                                | $0.6*k_{\text{CH300H\_OH}}$                                   | Taraborrelli (2016)                              |
| G43041  | TrGCN  | $\text{HCOCOCH}_2\text{OOH} + \text{NO}_3 \rightarrow \text{HOOCH}_2\text{CO}_3 + \text{CO} + \text{HNO}_3$                                                                                                         | KN03AL*2.4                                                    | Taraborrelli (2016)                              |
| G43042  | TrGC   | $\text{HOCH}_2\text{COCH}_2\text{O}_2 \rightarrow \text{HCHO} + \text{HOCH}_2\text{CO}$                                                                                                                             | k1_R02p0R02                                                   | Taraborrelli (2016)                              |
| G43043a | TrGC   | $\text{HOCH}_2\text{COCH}_2\text{O}_2 + \text{HO}_2 \rightarrow \text{HOCH}_2\text{COCH}_2\text{OOH}$                                                                                                               | $\text{KR02H02(3)*rcoch2o2\_ooh}$                             | Taraborrelli (2016)                              |
| G43043b | TrGC   | $\text{HOCH}_2\text{COCH}_2\text{O}_2 + \text{HO}_2 \rightarrow \text{HCHO} + \text{HOCH}_2\text{CO} + \text{OH}$                                                                                                   | $\text{KR02H02(3)*rcoch2o2\_oh}$                              | Taraborrelli (2016)                              |
| G43044  | TrGCN  | $\text{HOCH}_2\text{COCH}_2\text{O}_2 + \text{NO} \rightarrow \text{HCHO} + \text{HOCH}_2\text{CO} + \text{NO}_2$                                                                                                   | KR02N0                                                        | Taraborrelli (2016)*                             |
| G43045a | TrGC   | $\text{HOCH}_2\text{COCH}_2\text{OOH} + \text{OH} \rightarrow \text{HOCH}_2\text{COCHO} + \text{OH}$                                                                                                                | $k_{\text{s*ff\_sooh*ff\_co}}$                                | Taraborrelli (2016)                              |
| G43045b | TrGC   | $\text{HOCH}_2\text{COCH}_2\text{OOH} + \text{OH} \rightarrow \text{HOCH}_2\text{COCH}_2\text{O}_2$                                                                                                                 | $.6*k_{\text{CH300H\_OH}}$                                    | Taraborrelli (2016)                              |
| G43045c | TrGC   | $\text{HOCH}_2\text{COCH}_2\text{OOH} + \text{OH} \rightarrow \text{HCOCOCH}_2\text{OOH} + \text{HO}_2$                                                                                                             | $1.60\text{E-}12*\text{EXP}(305./\text{temp})$                | Taraborrelli (2016)*                             |
| G43046  | TrGC   | $\text{CH}_3\text{CHCO} + \text{OH} \rightarrow .72 \text{CO} + .72 \text{CH}_3\text{CHO} + .72 \text{HO}_2 + .21 \text{CH}_3\text{COCO}_2\text{H} + .07 \text{CH}_3\text{CHO} + .07 \text{HO}_2 + .07 \text{CO}_2$ | 7.6E-11                                                       | Hatakeyama et al. (1985),<br>Taraborrelli (2016) |
| G43047  | TrGCN  | $\text{PROPOLNO}_3 + \text{OH} \rightarrow \text{CH}_3\text{COCH}_2\text{OH} + \text{NO}_2$                                                                                                                         | $k_{\text{t*ff\_ono2*ff\_pch2oh+k\_s*ff\_soh*ff\_ch2ono2}}$   | Taraborrelli (2016)                              |
| G43048  | TrGCN  | $\text{CH}_3\text{COCH}_2\text{O}_2 + \text{NO}_2 \rightarrow \text{CH}_3\text{COCH}_2\text{OONO}_2$                                                                                                                | $2.3\text{E-}12*\text{EXP}(300./\text{temp})$                 | Tyndall et al. (2001a)*                          |
| G43049  | TrGCN  | $\text{CH}_3\text{COCH}_2\text{OONO}_2 \rightarrow \text{CH}_3\text{COCH}_2\text{O}_2 + \text{NO}_2$                                                                                                                | $1.9\text{E}16*\text{EXP}(-10830./\text{temp})$               | Sehested et al. (1998)*                          |
| G43050  | TrGCN  | $\text{CH}_3\text{COCH}_2\text{OONO}_2 + \text{OH} \rightarrow \text{MGLYOX} + \text{NO}_3 + \text{H}_2\text{O}$                                                                                                    | $9.50\text{E-}13*\text{EXP}(-650./\text{temp})*\text{ff\_co}$ | Taraborrelli (2016)*                             |
| G43051a | TrGC   | $\text{C}_3\text{H}_7\text{OOH} + \text{OH} \rightarrow \text{C}_3\text{H}_7\text{O}_2 + \text{H}_2\text{O}$                                                                                                        | $0.6*k_{\text{CH300H\_OH}}$                                   | Taraborrelli (2016)                              |
| G43051b | TrGC   | $\text{C}_3\text{H}_7\text{OOH} + \text{OH} \rightarrow \text{C}_2\text{H}_5\text{CHO} + \text{H}_2\text{O} + \text{OH}$                                                                                            | $k_{\text{s*ff\_sooh}}$                                       | Taraborrelli (2016)                              |
| G43051c | TrGC   | $\text{C}_3\text{H}_7\text{OOH} + \text{OH} \rightarrow \text{C}_2\text{H}_5\text{CHO} + \text{HO}_2 + \text{H}_2\text{O}$                                                                                          | $k_{\text{s*ff\_pch2oh}}$                                     | Taraborrelli (2016)*                             |
| G43052  | TrGC   | $\text{C}_2\text{H}_5\text{CHO} + \text{OH} \rightarrow \text{C}_2\text{H}_5\text{CO}_3 + \text{H}_2\text{O}$                                                                                                       | $4.9\text{E-}12*\text{EXP}(405./\text{temp})$                 | Atkinson et al. (2006)*                          |
| G43053  | TrGCN  | $\text{C}_2\text{H}_5\text{CHO} + \text{NO}_3 \rightarrow \text{C}_2\text{H}_5\text{CO}_3 + \text{HNO}_3$                                                                                                           | 6.3E-15                                                       | Atkinson et al. (2006)                           |
| G43054a | TrGC   | $\text{C}_2\text{H}_5\text{CO}_3 \rightarrow \text{C}_2\text{H}_5\text{O}_2 + \text{CO}_2$                                                                                                                          | $k1_{\text{R02RC03}*0.9}$                                     | Taraborrelli (2016)                              |
| G43054b | TrGC   | $\text{C}_2\text{H}_5\text{CO}_3 \rightarrow \text{C}_2\text{H}_5\text{CO}_2\text{H}$                                                                                                                               | $k1_{\text{R02RC03}*0.1}$                                     | Taraborrelli (2016)                              |
| G43055a | TrGC   | $\text{C}_2\text{H}_5\text{CO}_3 + \text{HO}_2 \rightarrow \text{C}_2\text{H}_5\text{O}_2 + \text{CO}_2 + \text{OH}$                                                                                                | $\text{KAPH02*rco3\_oh}$                                      | Taraborrelli (2016), Groß et al. (2014)          |
| G43055b | TrGC   | $\text{C}_2\text{H}_5\text{CO}_3 + \text{HO}_2 \rightarrow \text{C}_2\text{H}_5\text{CO}_3\text{H}$                                                                                                                 | $\text{KAPH02*rco3\_ooh}$                                     | Taraborrelli (2016), Groß et al. (2014)          |
| G43055c | TrGC   | $\text{C}_2\text{H}_5\text{CO}_3 + \text{HO}_2 \rightarrow \text{C}_2\text{H}_5\text{CO}_2\text{H} + \text{O}_3$                                                                                                    | $\text{KAPH02*rco3\_o3}$                                      | Taraborrelli (2016), Groß et al. (2014)          |
| G43056  | TrGCN  | $\text{C}_2\text{H}_5\text{CO}_3 + \text{NO} \rightarrow \text{NO}_2 + \text{C}_2\text{H}_5\text{O}_2 + \text{CO}_2$                                                                                                | KAPNO                                                         | Rickard and Pascoe (2009)                        |
| G43057  | TrGCN  | $\text{C}_2\text{H}_5\text{CO}_3 + \text{NO}_2 \rightarrow \text{PPN}$                                                                                                                                              | $k_{\text{CH3C03\_N02}}$                                      | Rickard and Pascoe (2009)                        |
| G43058  | TrGCN  | $\text{PPN} \rightarrow \text{C}_2\text{H}_5\text{CO}_3 + \text{NO}_2$                                                                                                                                              | $k_{\text{PAN\_M}}$                                           | Rickard and Pascoe (2009)                        |



Table 1: Gas phase reactions (... continued)

| #       | labels   | reaction                                                 | rate coefficient                                                                      | reference                                    |
|---------|----------|----------------------------------------------------------|---------------------------------------------------------------------------------------|----------------------------------------------|
| G43059  | TrGC     | $C_2H_5CO_2H + OH \rightarrow CH_3CHO + CO_2 + H_2O$     | $k_{co2h+k_p+k_{s*f_{co2h}}}$                                                         | Taraborrelli (2016)*                         |
| G43060a | TrGC     | $C_2H_5CO_3H + OH \rightarrow C_2H_5CO_3 + H_2O$         | $0.6*k_{CH300H_{OH}}$                                                                 | Taraborrelli (2016)                          |
| G43060b | TrGC     | $C_2H_5CO_3H + OH \rightarrow CH_3CHO + CO_2 + H_2O$     | $k_{s*f_{co2h+k_p}}$                                                                  | Taraborrelli (2016)*                         |
| G43061  | TrGCN    | $PPN + OH \rightarrow CH_3CHO + CO_2 + NO_2 + H_2O$      | $k_{s*f_{cpan+k_p}}$                                                                  | Taraborrelli (2016)*                         |
| G43062  | TrGC     | $CH_3COCO_3H + OH \rightarrow CH_3COCO_3 + H_2O$         | $0.6*k_{CH300H_{OH}}$                                                                 | Taraborrelli (2016)                          |
| G43063a | TrGC     | $CH_3COCO_3 + HO_2 \rightarrow CH_3C(O) + CO_2 + OH$     | $KAPH02*rco3_{oh}$                                                                    | Taraborrelli (2016)                          |
| G43063b | TrGC     | $CH_3COCO_3 + HO_2 \rightarrow CH_3COCO_3H$              | $KAPH02*(rco3_{ooh+rco3_{o3}})$                                                       | Taraborrelli (2016)                          |
| G43064  | TrGCN    | $CH_3COCO_3 + NO \rightarrow CH_3C(O) + CO_2 + NO_2$     | KAPNO                                                                                 | Taraborrelli (2016)                          |
| G43065  | TrGCN    | $CH_3COCO_3 + NO_2 \rightarrow CH_3C(O) + CO_2 + NO_3$   | $k_{CH3C03_{NO2}}$                                                                    | Taraborrelli (2016)*                         |
| G43066  | TrGCN    | $CH_3COCO_3 + NO_3 \rightarrow CH_3C(O)OO + CO_2 + NO_2$ | $KR02N03*1.74$                                                                        | Taraborrelli (2016)                          |
| G43067  | TrGC     | $CH_3COCO_3 \rightarrow CH_3C(O)OO + CO_2$               | $k1_{R02RC03}$                                                                        | Taraborrelli (2016)                          |
| G43068  | TrGC     | $HCOCOCHO + OH \rightarrow 3 CO + HO_2$                  | $2.*k_{t*f_{co*f_o}}$                                                                 | Taraborrelli (2016)                          |
| G43069  | TrGC     | $IPROPOL + OH \rightarrow CH_3COCH_3 + HO_2 + H_2O$      | $2.6E-12*EXP(200./temp)$                                                              | Atkinson et al. (2006)                       |
| G43070a | TrGC     | $NPROPOL + OH \rightarrow C_2H_5CHO + HO_2 + H_2O$       | $4.6E-12*EXP(70./temp)*(k_{s*f_{soh}}/(k_p+k_{s*f_{pch2oh+k_{s*f_{soh}}}}))$          | Atkinson et al. (2006), Taraborrelli (2016)* |
| G43070b | TrGC     | $NPROPOL + OH \rightarrow HYPROPO2 + H_2O$               | $4.6E-12*EXP(70./temp)*((k_p+k_{s*f_{pch2oh}})/(k_p+k_{s*f_{pch2oh+k_{s*f_{soh}}}}))$ | Atkinson et al. (2006), Taraborrelli (2016)* |
| G43071a | TrGC     | $CH_2CHCH_2OH + OH \rightarrow HCOOH + OH + CH_3CHO$     | $k_{CH2CHOH_{OH_{HCOOH}}}$                                                            | Taraborrelli (2016), So et al. (2014)*       |
| G43072  | TrGC     | $CH_2CHCH_2OH + HCOOH \rightarrow C_2H_5CHO + HCOOH$     | $k_{CH2CHOH_{HCOOH}}$                                                                 | Taraborrelli (2016), daSilva (2010)*         |
| G43073  | TrGC     | $C_2H_5CHO + HCOOH \rightarrow CH_2CHCH_2OH + HCOOH$     | $k_{ALD_{HCOOH}}$                                                                     | Taraborrelli (2016), daSilva (2010)*         |
| G43074  | TrGC     | $HCOCOCH_2OOH + OH \rightarrow HCOCO + CO + HO_2 + OH$   | $k_{s*f_{sooh*f_{co}}+6*k_{CH300H_{OH}}}$                                             | Taraborrelli (2016)*                         |
| G43202  | TrGTerC  | $HCOCH_2CHO + OH \rightarrow HCOCH_2CO_3$                | $4.29E-11$                                                                            | Rickard and Pascoe (2009)                    |
| G43203  | TrGTerCN | $HCOCH_2CHO + NO_3 \rightarrow HCOCH_2CO_3 + HNO_3$      | $2.*KN03AL*2.4$                                                                       | Rickard and Pascoe (2009)                    |
| G43204a | TrGTerC  | $HCOCH_2CO_3 \rightarrow HCOCH_2O_2 + CO_2$              | $k1_{R02RC03*0.9}$                                                                    | Taraborrelli (2016)                          |
| G43204b | TrGTerC  | $HCOCH_2CO_3 \rightarrow HCOCH_2CO_2H$                   | $k1_{R02RC03*0.1}$                                                                    | Taraborrelli (2016)                          |
| G43205  | TrGTerCN | $HCOCH_2CO_3 + NO \rightarrow HCOCH_2O_2 + CO_2 + NO_2$  | KAPNO                                                                                 | Rickard and Pascoe (2009)                    |
| G43206  | TrGTerCN | $HCOCH_2CO_3 + NO_2 \rightarrow C3PAN2$                  | $k_{CH3C03_{NO2}}$                                                                    | Rickard and Pascoe (2009)                    |
| G43207a | TrGTerC  | $HCOCH_2CO_3 + HO_2 \rightarrow HCOCH_2CO_3H$            | $KAPH02*rco3_{ooh}$                                                                   | Rickard and Pascoe (2009)                    |
| G43207b | TrGTerC  | $HCOCH_2CO_3 + HO_2 \rightarrow HCOCH_2CO_2H + O_3$      | $KAPH02*rco3_{o3}$                                                                    | Rickard and Pascoe (2009)                    |
| G43207c | TrGTerC  | $HCOCH_2CO_3 + HO_2 \rightarrow HCOCH_2O_2 + CO_2 + OH$  | $KAPH02*rco3_{oh}$                                                                    | Rickard and Pascoe (2009)                    |
| G43210  | TrGTerCN | $C3PAN2 \rightarrow HCOCH_2CO_3 + NO_2$                  | $k_{PAN_M}$                                                                           | Rickard and Pascoe (2009)                    |

Table 1: Gas phase reactions (... continued)

| #       | labels   | reaction                                                  | rate coefficient                                 | reference                                         |
|---------|----------|-----------------------------------------------------------|--------------------------------------------------|---------------------------------------------------|
| G43211  | TrGTerCN | $C3PAN2 + OH \rightarrow GLYOX + CO + NO_2$               | 2.10E-11                                         | Rickard and Pascoe (2009)                         |
| G43212  | TrGTerC  | $HCOCH2CO2H + OH \rightarrow HCOCH2O2 + CO_2$             | 2.14E-11                                         | Rickard and Pascoe (2009)                         |
| G43213a | TrGTerC  | $HOC2H4CO3 \rightarrow HOCH_2CH_2O_2 + CO_2$              | $k1\_R02RC03*0.9$                                | Taraborrelli (2016)                               |
| G43213b | TrGTerC  | $HOC2H4CO3 \rightarrow HOC2H4CO2H$                        | $k1\_R02RC03*0.1$                                | Taraborrelli (2016)                               |
| G43214  | TrGTerCN | $HOC2H4CO3 + NO \rightarrow HOCH_2CH_2O_2 + CO_2 + NO_2$  | KAPNO                                            | Rickard and Pascoe (2009)                         |
| G43215a | TrGTerC  | $HOC2H4CO3 + HO_2 \rightarrow HOC2H4CO3H$                 | $KAPH02*rc03\_ooh$                               | Rickard and Pascoe (2009)                         |
| G43215b | TrGTerC  | $HOC2H4CO3 + HO_2 \rightarrow HOCH_2CH_2O_2 + CO_2 + OH$  | $KAPH02*rc03\_oh$                                | Rickard and Pascoe (2009)                         |
| G43215c | TrGTerC  | $HOC2H4CO3 + HO_2 \rightarrow HOC2H4CO2H + O_3$           | $KAPH02*rc03\_o3$                                | Rickard and Pascoe (2009)                         |
| G43218  | TrGTerCN | $HOC2H4CO3 + NO_2 \rightarrow C3PAN1$                     | $k\_CH3C03\_NO2$                                 | Rickard and Pascoe (2009)                         |
| G43219  | TrGTerC  | $HOC2H4CO2H + OH \rightarrow HOCH_2CH_2O_2 + CO_2$        | 1.39E-11                                         | Rickard and Pascoe (2009)                         |
| G43220  | TrGTerC  | $HOC2H4CO3H + OH \rightarrow HOC2H4CO3$                   | 1.73E-11                                         | Rickard and Pascoe (2009)                         |
| G43221  | TrGTerCN | $C3PAN1 \rightarrow HOC2H4CO3 + NO_2$                     | $k\_PAN\_M$                                      | Rickard and Pascoe (2009)                         |
| G43222  | TrGTerCN | $C3PAN1 + OH \rightarrow HOCH_2CHO + CO + NO_2$           | 4.51E-12                                         | Rickard and Pascoe (2009)                         |
| G43223  | TrGTerC  | $HCOCH2CO3H + OH \rightarrow HCOCH2O2 + CO_2 + H_2O$      | 2.49E-11                                         | Rickard and Pascoe (2009)*                        |
| G43415  | TrGAroC  | $C3DIALOOH + OH \rightarrow HCOCOCHO + OH$                | 1.44E-10                                         | Rickard and Pascoe (2009)                         |
| G43418a | TrGAroC  | $C3DIALO2 + HO_2 \rightarrow C3DIALOOH$                   | $KR02H02(3)*(rc03\_ooh+rc03\_o3)$                | Rickard and Pascoe (2009)                         |
| G43418b | TrGAroC  | $C3DIALO2 + HO_2 \rightarrow GLYOX + CO + HO_2 + OH$      | $KR02H02(3)*rc03\_oh$                            | Rickard and Pascoe (2009)                         |
| G43419  | TrGAroCN | $C3DIALO2 + NO \rightarrow GLYOX + CO + HO_2 + NO_2$      | KR02NO                                           | Rickard and Pascoe (2009)*                        |
| G43420  | TrGAroCN | $C3DIALO2 + NO_3 \rightarrow GLYOX + CO + HO_2 + NO_2$    | KR02NO3                                          | Rickard and Pascoe (2009)*                        |
| G43421  | TrGAroC  | $C3DIALO2 \rightarrow GLYOX + CO + HO_2$                  | $k1\_R02s0R02$                                   | Rickard and Pascoe (2009)*                        |
| G43422a | TrGAroC  | $HCOCOHCO3 + HO_2 \rightarrow GLYOX + CO_2 + HO_2 + OH$   | $KAPH02*rc03\_oh$                                | Rickard and Pascoe (2009)                         |
| G43422b | TrGAroC  | $HCOCOHCO3 + HO_2 \rightarrow HCOCOHCO3H$                 | $KAPH02*(rc03\_ooh+rc03\_o3)$                    | Rickard and Pascoe (2009)                         |
| G43424  | TrGAroCN | $HCOCOHCO3 + NO \rightarrow GLYOX + CO_2 + HO_2 + NO_2$   | KAPNO                                            | Rickard and Pascoe (2009)                         |
| G43425  | TrGAroCN | $HCOCOHCO3 + NO_2 \rightarrow HCOCOH PAN$                 | $k\_CH3C03\_NO2$                                 | Rickard and Pascoe (2009)                         |
| G43426  | TrGAroCN | $HCOCOHCO3 + NO_3 \rightarrow GLYOX + CO_2 + HO_2 + NO_2$ | $KR02NO3*1.74$                                   | Rickard and Pascoe (2009)                         |
| G43427  | TrGAroC  | $HCOCOHCO3 \rightarrow GLYOX + CO_2 + HO_2$               | $k1\_R02RC03$                                    | Rickard and Pascoe (2009)                         |
| G43428  | TrGAroC  | $METACETHO + OH \rightarrow CH_3C(O) + CO_2$              | 9.82E-11                                         | Rickard and Pascoe (2009)                         |
| G43442  | TrGAroCN | $HCOCOH PAN + OH \rightarrow GLYOX + CO + NO_2$           | 6.97E-11                                         | Rickard and Pascoe (2009)                         |
| G43443  | TrGAroCN | $HCOCOH PAN \rightarrow HCOCOHCO3 + NO_2$                 | $k\_PAN\_M$                                      | Rickard and Pascoe (2009)                         |
| G43444  | TrGAroC  | $C32OH13CO + OH \rightarrow HCOCOHCO3$                    | 1.36E-10                                         | Rickard and Pascoe (2009)                         |
| G43446  | TrGAroC  | $HCOCOHCO3H + OH \rightarrow HCOCOHCO3$                   | 7.33E-11                                         | Rickard and Pascoe (2009)                         |
| G44000  | TrGC     | $C_4H_{10} + OH \rightarrow LC_4H_9O_2 + H_2O$            | $2.03E-17*temp*temp*EXP(78./temp)$               | Atkinson et al. (2006)*                           |
| G44001a | TrGC     | $LC_4H_9O_2 \rightarrow C_3H_7CHO + HO_2$                 | $(k1\_R02pR02*0.1273+k1\_R02sR02*0.8727)*0.1273$ | Rickard and Pascoe (2009),<br>Taraborrelli (2016) |

Table 1: Gas phase reactions (... continued)

| #       | labels | reaction                                                                                                                                                                            | rate coefficient                                                                                                                             | reference                                       |
|---------|--------|-------------------------------------------------------------------------------------------------------------------------------------------------------------------------------------|----------------------------------------------------------------------------------------------------------------------------------------------|-------------------------------------------------|
| G44001b | TrGC   | $\text{LC}_4\text{H}_9\text{O}_2 \rightarrow .636 \text{ MEK} + .636 \text{ HO}_2 + .364 \text{ CH}_3\text{CHO} + .364 \text{ C}_2\text{H}_5\text{O}_2$                             | $(k1\_R02pR02*0.1273+k1\_R02sR02*0.8727)*0.8727$                                                                                             | Rickard and Pascoe (2009), Taraborrelli (2016)* |
| G44002  | TrGC   | $\text{LC}_4\text{H}_9\text{O}_2 + \text{HO}_2 \rightarrow \text{LC}_4\text{H}_9\text{OOH}$                                                                                         | KR02H02(4)                                                                                                                                   | Rickard and Pascoe (2009)                       |
| G44003a | TrGCN  | $\text{LC}_4\text{H}_9\text{O}_2 + \text{NO} \rightarrow \text{NO}_2 + \text{C}_3\text{H}_7\text{CHO} + \text{HO}_2$                                                                | $\text{KR02N0}*(1.-(0.1273*\alpha\_AN(4,1,0,0,0,\text{temp},\text{cair}))+0.8727*\alpha\_AN(4,2,0,0,0,0,\text{temp},\text{cair}))) * 0.1273$ | Rickard and Pascoe (2009), Taraborrelli (2016)  |
| G44003b | TrGCN  | $\text{LC}_4\text{H}_9\text{O}_2 + \text{NO} \rightarrow \text{NO}_2 + .636 \text{ MEK} + .636 \text{ HO}_2 + .364 \text{ CH}_3\text{CHO} + .364 \text{ C}_2\text{H}_5\text{O}_2$   | $\text{KR02N0}*(1.-(0.1273*\alpha\_AN(4,1,0,0,0,\text{temp},\text{cair}))+0.8727*\alpha\_AN(4,2,0,0,0,0,\text{temp},\text{cair}))) * 0.8727$ | Rickard and Pascoe (2009), Taraborrelli (2016)  |
| G44003c | TrGCN  | $\text{LC}_4\text{H}_9\text{O}_2 + \text{NO} \rightarrow \text{LC}_4\text{H}_9\text{NO}_3$                                                                                          | $\text{KR02N0}*(0.1273*\alpha\_AN(4,1,0,0,0,\text{temp},\text{cair}))+0.8727*\alpha\_AN(4,2,0,0,0,\text{temp},\text{cair}))$                 | Rickard and Pascoe (2009)*                      |
| G44004a | TrGCN  | $\text{LC}_4\text{H}_9\text{O}_2 + \text{NO}_3 \rightarrow \text{NO}_2 + \text{C}_3\text{H}_7\text{CHO} + \text{HO}_2$                                                              | $\text{KR02N03} * 0.1273$                                                                                                                    | Rickard and Pascoe (2009), Taraborrelli (2016)  |
| G44004b | TrGCN  | $\text{LC}_4\text{H}_9\text{O}_2 + \text{NO}_3 \rightarrow \text{NO}_2 + .636 \text{ MEK} + .636 \text{ HO}_2 + .364 \text{ CH}_3\text{CHO} + .364 \text{ C}_2\text{H}_5\text{O}_2$ | $\text{KR02N03} * 0.8727$                                                                                                                    | Rickard and Pascoe (2009), Taraborrelli (2016)  |
| G44005a | TrGC   | $\text{LC}_4\text{H}_9\text{OOH} + \text{OH} \rightarrow \text{LC}_4\text{H}_9\text{O}_2 + \text{H}_2\text{O}$                                                                      | $0.6*k\_CH300H\_OH$                                                                                                                          | Taraborrelli (2016)                             |
| G44005b | TrGC   | $\text{LC}_4\text{H}_9\text{OOH} + \text{OH} \rightarrow \text{C}_3\text{H}_7\text{CHO} + \text{H}_2\text{O} + \text{OH}$                                                           | $k\_s*f\_tooh*f\_alk*(k\_p/(k\_p+k\_s))$                                                                                                     | Taraborrelli (2016)                             |
| G44005c | TrGC   | $\text{LC}_4\text{H}_9\text{OOH} + \text{OH} \rightarrow \text{MEK} + \text{H}_2\text{O} + \text{OH}$                                                                               | $k\_t*f\_tooh*f\_alk*(k\_s/(k\_p+k\_s))$                                                                                                     | Taraborrelli (2016)                             |
| G44006a | TrGC   | $i\text{C}_4\text{H}_{10} + \text{OH} \rightarrow \text{TC}_4\text{H}_9\text{O}_2 + \text{H}_2\text{O}$                                                                             | $1.17\text{E}-17*\text{temp}*\text{temp}*\text{EXP}(213./\text{temp}) * k\_t / (3.*k\_p+k\_t)$                                               | Atkinson (2003)                                 |
| G44006b | TrGC   | $i\text{C}_4\text{H}_{10} + \text{OH} \rightarrow \text{IC}_4\text{H}_9\text{O}_2 + \text{H}_2\text{O}$                                                                             | $1.17\text{E}-17*\text{temp}*\text{temp}*\text{EXP}(213./\text{temp}) * 3.*k\_p / (3.*k\_p+k\_t)$                                            | Atkinson (2003)                                 |
| G44007  | TrGC   | $\text{TC}_4\text{H}_9\text{O}_2 \rightarrow \text{CH}_3\text{COCH}_3 + \text{CH}_3$                                                                                                | $k1\_R02tR02$                                                                                                                                | Rickard and Pascoe (2009), Taraborrelli (2016)  |
| G44008  | TrGC   | $\text{TC}_4\text{H}_9\text{O}_2 + \text{HO}_2 \rightarrow \text{TC}_4\text{H}_9\text{OOH}$                                                                                         | KR02H02(4)                                                                                                                                   | Rickard and Pascoe (2009)                       |
| G44009a | TrGCN  | $\text{TC}_4\text{H}_9\text{O}_2 + \text{NO} \rightarrow \text{NO}_2 + \text{CH}_3\text{COCH}_3 + \text{CH}_3$                                                                      | $\text{KR02N0}*(1.-\alpha\_AN(4,3,0,0,0,0,\text{temp},\text{cair}))$                                                                         | Rickard and Pascoe (2009), Taraborrelli (2016)  |
| G44009b | TrGCN  | $\text{TC}_4\text{H}_9\text{O}_2 + \text{NO} \rightarrow \text{TC}_4\text{H}_9\text{NO}_3$                                                                                          | $\text{KR02N0}*\alpha\_AN(4,3,0,0,0,0,\text{temp},\text{cair})$                                                                              | Rickard and Pascoe (2009)                       |
| G44010a | TrGC   | $\text{TC}_4\text{H}_9\text{OOH} + \text{OH} \rightarrow \text{TC}_4\text{H}_9\text{O}_2 + \text{H}_2\text{O}$                                                                      | $0.6*k\_CH300H\_OH$                                                                                                                          | Taraborrelli (2016)                             |
| G44010b | TrGC   | $\text{TC}_4\text{H}_9\text{OOH} + \text{OH} \rightarrow \text{CH}_3\text{COCH}_3 + \text{HCHO} + \text{OH} + \text{H}_2\text{O}$                                                   | $3.*k\_p*f\_tch2oh$                                                                                                                          | Taraborrelli (2016)*                            |
| G44011  | TrGCN  | $\text{TC}_4\text{H}_9\text{NO}_3 + \text{OH} \rightarrow \text{CH}_3\text{COCH}_3 + \text{HCHO} + \text{NO}_2 + \text{H}_2\text{O}$                                                | $3.*k\_p*f\_ch2ono2$                                                                                                                         | Taraborrelli (2016)*                            |
| G44012  | TrGC   | $\text{IC}_4\text{H}_9\text{O}_2 \rightarrow \text{IPRCHO}$                                                                                                                         | $k1\_R02sR02$                                                                                                                                | Rickard and Pascoe (2009), Taraborrelli (2016)  |

Table 1: Gas phase reactions (... continued)

| #       | labels | reaction                                                                                                                                                                                                                                                                                                                                                                                                                  | rate coefficient                                                                                                                                                    | reference                                      |
|---------|--------|---------------------------------------------------------------------------------------------------------------------------------------------------------------------------------------------------------------------------------------------------------------------------------------------------------------------------------------------------------------------------------------------------------------------------|---------------------------------------------------------------------------------------------------------------------------------------------------------------------|------------------------------------------------|
| G44013  | TrGC   | $\text{IC}_4\text{H}_9\text{O}_2 + \text{HO}_2 \rightarrow \text{IC}_4\text{H}_9\text{OOH}$                                                                                                                                                                                                                                                                                                                               | KR02H02(4)                                                                                                                                                          | Rickard and Pascoe (2009)                      |
| G44014a | TrGCN  | $\text{IC}_4\text{H}_9\text{O}_2 + \text{NO} \rightarrow \text{NO}_2 + \text{IPRCHO}$                                                                                                                                                                                                                                                                                                                                     | $\text{KR02N0}*(1-(\alpha_{\text{AN}}(4,2,0,0,0, \text{temp}, \text{cair})))$                                                                                       | Rickard and Pascoe (2009), Taraborrelli (2016) |
| G44014b | TrGCN  | $\text{IC}_4\text{H}_9\text{O}_2 + \text{NO} \rightarrow \text{IC4H9NO3}$                                                                                                                                                                                                                                                                                                                                                 | $\text{KR02N0}*\alpha_{\text{AN}}(4,2,0,0,0, \text{temp}, \text{cair})$                                                                                             | Rickard and Pascoe (2009)                      |
| G44015a | TrGC   | $\text{IC}_4\text{H}_9\text{OOH} + \text{OH} \rightarrow \text{IC}_4\text{H}_9\text{O}_2 + \text{H}_2\text{O}$                                                                                                                                                                                                                                                                                                            | $0.6*k_{\text{CH300H\_OH}}$                                                                                                                                         | Taraborrelli (2016)                            |
| G44015b | TrGC   | $\text{IC}_4\text{H}_9\text{OOH} + \text{OH} \rightarrow \text{IPRCHO} + \text{OH} + \text{H}_2\text{O}$                                                                                                                                                                                                                                                                                                                  | $k_{\text{s}}*f_{\text{sooh}}+2.*k_{\text{s}}+k_{\text{t}}*f_{\text{pch2oh}}$                                                                                       | Taraborrelli (2016)*                           |
| G44016  | TrGCN  | $\text{IC4H9NO3} + \text{OH} \rightarrow \text{IPRCHO} + \text{NO}_2 + \text{H}_2\text{O}$                                                                                                                                                                                                                                                                                                                                | $k_{\text{s}}*f_{\text{ono2}}+2.*k_{\text{p}}+k_{\text{t}}*f_{\text{ch2ono2}}$                                                                                      | Taraborrelli (2016)*                           |
| G44017  | TrGC   | $\text{MVK} + \text{O}_3 \rightarrow .87 \text{MGLYOX} + .5481 \text{CO} + .1392 \text{HO}_2 + .1392 \text{OH} + .3219 \text{CH}_2\text{OO} + .13 \text{HCHO} + .04680 \text{OH} + .04680 \text{CO} + .07280 \text{CH}_3\text{C(O)} + .026 \text{CH}_3\text{CHO} + .026 \text{CO}_2 + .026 \text{HCHO} + .026 \text{HO}_2 + .02402 \text{MGLYOX} + .02402 \text{H}_2\text{O}_2 + .00718 \text{CH}_3\text{COCO}_2\text{H}$ | $8.5\text{E-}16*\text{EXP}(-1520./\text{temp})$                                                                                                                     | Taraborrelli (2016)                            |
| G44018  | TrGC   | $\text{MVK} + \text{OH} \rightarrow \text{LHMVKABO2}$                                                                                                                                                                                                                                                                                                                                                                     | $2.6\text{E-}12*\text{EXP}(610./\text{temp})$                                                                                                                       | Taraborrelli (2016), Atkinson et al. (2006)*   |
| G44019  | TrGC   | $\text{MEK} + \text{OH} \rightarrow \text{LMEKO2} + \text{H}_2\text{O}$                                                                                                                                                                                                                                                                                                                                                   | $1.5\text{E-}12*\text{EXP}(-90./\text{temp})$                                                                                                                       | Atkinson et al. (2006), Taraborrelli (2016)*   |
| G44020  | TrGC   | $\text{LMEKO2} + \text{HO}_2 \rightarrow \text{LMEKOOH}$                                                                                                                                                                                                                                                                                                                                                                  | KR02H02(4)                                                                                                                                                          | Taraborrelli (2016)                            |
| G44021a | TrGCN  | $\text{LMEKO2} + \text{NO} \rightarrow .62 \text{CH}_3\text{CHO} + .62 \text{CH}_3\text{C(O)} + .38 \text{HCHO} + .38 \text{CO}_2 + .38 \text{HOCH}_2\text{CH}_2\text{O}_2 + \text{NO}_2$                                                                                                                                                                                                                                 | $\text{KR02N0}*(1-(.62*\alpha_{\text{AN}}(4,2,1,0,0, \text{temp}, \text{cair})+.38*\alpha_{\text{AN}}(4,1,0,1,0, \text{temp}, \text{cair})))$                       | Taraborrelli (2016)*                           |
| G44021b | TrGCN  | $\text{LMEKO2} + \text{NO} \rightarrow \text{LMEKNO3}$                                                                                                                                                                                                                                                                                                                                                                    | $\text{KR02N0}*(.62*\alpha_{\text{AN}}(4,2,1,0,0, \text{temp}, \text{cair})+.38*\alpha_{\text{AN}}(4,1,0,1,0, \text{temp}, \text{cair}))$                           | Taraborrelli (2016)                            |
| G44022a | TrGC   | $\text{LMEKOOH} + \text{OH} \rightarrow \text{LMEKO2} + \text{H}_2\text{O}$                                                                                                                                                                                                                                                                                                                                               | $0.6*k_{\text{CH300H\_OH}}$                                                                                                                                         | Taraborrelli (2016)                            |
| G44022b | TrGC   | $\text{LMEKOOH} + \text{OH} \rightarrow .62 \text{BIACET} + .38 \text{HCHO} + .38 \text{CO}_2 + .38 \text{HOCH}_2\text{CH}_2\text{O}_2 + \text{H}_2\text{O} + \text{OH}$                                                                                                                                                                                                                                                  | $(.62*k_{\text{t}}*f_{\text{tooh}}*f_{\text{co}}+.38*k_{\text{s}}*f_{\text{sooh}})$                                                                                 | Taraborrelli (2016)                            |
| G44023a | TrGCN  | $\text{LC4H9NO3} + \text{OH} \rightarrow \text{MEK} + \text{NO}_2 + \text{H}_2\text{O}$                                                                                                                                                                                                                                                                                                                                   | $(k_{\text{t}}*f_{\text{ono2}}*f_{\text{alk}}+k_{\text{p}}*f_{\text{alk}}+k_{\text{s}}*f_{\text{ch2ono2}}+k_{\text{p}})*(k_{\text{s}}/(k_{\text{p}}+k_{\text{s}}))$ | Taraborrelli (2016)*                           |
| G44023b | TrGCN  | $\text{LC4H9NO3} + \text{OH} \rightarrow \text{C}_3\text{H}_7\text{CHO} + \text{NO}_2 + \text{H}_2\text{O}$                                                                                                                                                                                                                                                                                                               | $(k_{\text{p}}+k_{\text{s}}*(1+f_{\text{ch2ono2}}+f_{\text{ono2}})*f_{\text{alk}})*(k_{\text{p}}/(k_{\text{p}}+k_{\text{s}}))$                                      | Taraborrelli (2016)*                           |
| G44024  | TrGCN  | $\text{MPAN} + \text{OH} \rightarrow \text{CH}_3\text{COCH}_2\text{OH} + \text{CO} + \text{NO}_2$                                                                                                                                                                                                                                                                                                                         | $3.2\text{E-}11$                                                                                                                                                    | Orlando et al. (2002)                          |
| G44025  | TrGCN  | $\text{MPAN} \rightarrow \text{MACO3} + \text{NO}_2$                                                                                                                                                                                                                                                                                                                                                                      | $k_{\text{PAN\_M}}$                                                                                                                                                 | see note*                                      |

Table 1: Gas phase reactions (... continued)

| #       | labels | reaction                                                                                                                                                                                                                     | rate coefficient                            | reference                                   |
|---------|--------|------------------------------------------------------------------------------------------------------------------------------------------------------------------------------------------------------------------------------|---------------------------------------------|---------------------------------------------|
| G44026  | TrGC   | LMEKO2 $\rightarrow$ .538 HCHO + .538 CO <sub>2</sub> + .459 HOCH <sub>2</sub> CH <sub>2</sub> O <sub>2</sub> + .079 C <sub>2</sub> H <sub>5</sub> O <sub>2</sub> + .462 CH <sub>3</sub> C(O) + .462 CH <sub>3</sub> CHO     | (.62*k1_R02s0R02+.38*k1_R02p0R02)           | Rickard and Pascoe (2009)*                  |
| G44027  | TrGC   | MACR + OH $\rightarrow$ .45 MACO3 + .55 MACRO2                                                                                                                                                                               | 8.E-12*EXP(380./temp)                       | Orlando et al. (1999b), Taraborrelli (2016) |
| G44028  | TrGC   | MACR + O <sub>3</sub> $\rightarrow$ .5481 CO + .1392 HO <sub>2</sub> + .1392 OH + .3219 CH <sub>2</sub> OO + .87 MGLYOX + .13 HCHO + .13 OH + .065 HCOCOCH <sub>2</sub> O <sub>2</sub> + .065 CO + .065 CH <sub>3</sub> C(O) | 1.36E-15*EXP(-2112./temp)                   | Taraborrelli (2016)                         |
| G44029  | TrGCN  | MACR + NO <sub>3</sub> $\rightarrow$ MACO3 + HNO <sub>3</sub>                                                                                                                                                                | KNO3AL*2.0                                  | Rickard and Pascoe (2009)                   |
| G44030a | TrGC   | MACO3 $\rightarrow$ CH <sub>3</sub> C(O) + HCHO + CO <sub>2</sub>                                                                                                                                                            | k1_R02RCO3*0.9                              | Taraborrelli (2016)                         |
| G44030b | TrGC   | MACO3 $\rightarrow$ MACO2H                                                                                                                                                                                                   | k1_R02RCO3*0.1                              | Taraborrelli (2016)                         |
| G44031a | TrGC   | MACO3 + HO <sub>2</sub> $\rightarrow$ MACO2 + OH                                                                                                                                                                             | KAPH02*rc03_oh                              | Taraborrelli (2016)                         |
| G44031b | TrGC   | MACO3 + HO <sub>2</sub> $\rightarrow$ MACO3H                                                                                                                                                                                 | KAPH02*rc03_ooh                             | Taraborrelli (2016)                         |
| G44031c | TrGC   | MACO3 + HO <sub>2</sub> $\rightarrow$ MACO2H + O <sub>3</sub>                                                                                                                                                                | KAPH02*rc03_o3                              | Taraborrelli (2016)                         |
| G44032  | TrGCN  | MACO3 + NO $\rightarrow$ MACO2 + NO <sub>2</sub>                                                                                                                                                                             | 8.70E-12*EXP(290./temp)                     | Taraborrelli (2016)                         |
| G44033  | TrGCN  | MACO3 + NO <sub>2</sub> $\rightarrow$ MPAN                                                                                                                                                                                   | k_CH3CO3_NO2                                | Rickard and Pascoe (2009)                   |
| G44034  | TrGCN  | MACO3 + NO <sub>3</sub> $\rightarrow$ MACO2 + NO <sub>2</sub>                                                                                                                                                                | KRO2NO3*1.60                                | Taraborrelli (2016)                         |
| G44035  | TrGC   | MACRO2 $\rightarrow$ .7 CH <sub>3</sub> COCH <sub>2</sub> OH + .7 HCHO + .7 HO <sub>2</sub> + .3 MACROH                                                                                                                      | k1_R02t0R02                                 | Rickard and Pascoe (2009)*                  |
| G44036a | TrGC   | MACRO2 + HO <sub>2</sub> $\rightarrow$ MACRO + OH                                                                                                                                                                            | KRO2H02(4)*rc0ch2o2_oh                      | Taraborrelli (2016)                         |
| G44036b | TrGC   | MACRO2 + HO <sub>2</sub> $\rightarrow$ MACROOH                                                                                                                                                                               | KRO2H02(4)*rc0ch2o2_ooh                     | Taraborrelli (2016)                         |
| G44037a | TrGCN  | MACRO2 + NO $\rightarrow$ MACRO + NO <sub>2</sub>                                                                                                                                                                            | KRO2NO*(1.-alpha_AN(6,3,1,0,0, temp, cair)) | Taraborrelli (2016)                         |
| G44037b | TrGCN  | MACRO2 + NO $\rightarrow$ MACRN                                                                                                                                                                                              | KRO2NO*alpha_AN(6,3,1,0,0, temp, cair)      | Taraborrelli (2016)                         |
| G44038  | TrGCN  | MACRO2 + NO <sub>3</sub> $\rightarrow$ MACRO + NO <sub>2</sub>                                                                                                                                                               | KRO2NO3                                     | Taraborrelli (2016)                         |
| G44039a | TrGC   | MACROOH + OH $\rightarrow$ MACRO2                                                                                                                                                                                            | 0.6*k_CH300H_OH                             | Taraborrelli (2016)                         |
| G44039b | TrGC   | MACROOH + OH $\rightarrow$ CO + CH <sub>3</sub> COCH <sub>2</sub> OH + OH                                                                                                                                                    | k_t*f_o*f_tch2oh*f_alk                      | Taraborrelli (2016)                         |
| G44039c | TrGC   | MACROOH + OH $\rightarrow$ CO + MGLYOX + HO <sub>2</sub>                                                                                                                                                                     | (k_s*f_soh*f_pch2oh + k_rohro)              | Taraborrelli (2016)                         |
| G44040  | TrGC   | MACROH + OH $\rightarrow$ CH <sub>3</sub> COCH <sub>2</sub> OH + CO + HO <sub>2</sub>                                                                                                                                        | k_t*f_o*f_tch2oh*f_alk                      | Taraborrelli (2016)                         |
| G44041  | TrGC   | MACRO $\rightarrow$ .885 CH <sub>3</sub> COCH <sub>2</sub> OH + .885 CO + .115 MGLYOX + .115 HCHO + HO <sub>2</sub>                                                                                                          | KDEC                                        | Taraborrelli (2016)                         |
| G44042  | TrGC   | MACO2H + OH $\rightarrow$ CH <sub>3</sub> COCH <sub>2</sub> OH + HO <sub>2</sub> + CO <sub>2</sub>                                                                                                                           | ((k_adt+k_adp)*a_co2h+k_co2h)               | Taraborrelli (2016)                         |
| G44043a | TrGC   | MACO3H + OH $\rightarrow$ CH <sub>3</sub> COCH <sub>2</sub> OH + CO <sub>2</sub> + OH                                                                                                                                        | (k_adt+k_adp)*a_co2h                        | Taraborrelli (2016)                         |
| G44043b | TrGC   | MACO3H + OH $\rightarrow$ MACO3                                                                                                                                                                                              | 0.6*k_CH300H_OH                             | Taraborrelli (2016)                         |

Table 1: Gas phase reactions (... continued)

| #       | labels | reaction                                                                                                                                                                             | rate coefficient                                                                 | reference                 |
|---------|--------|--------------------------------------------------------------------------------------------------------------------------------------------------------------------------------------|----------------------------------------------------------------------------------|---------------------------|
| G44044  | TrGC   | LHMVKABO2 $\rightarrow$ .024 CO2H3CHO + .072 MGLYOX + .072 HO <sub>2</sub> + .072 HCHO + .5280 CH <sub>3</sub> C(O) + .5280 HOCH <sub>2</sub> CHO + .176 BIACETOH + .2 HO12CO3C4     | (.12*k1_R02p0R02+.88*k1_R02s0R02)                                                | Taraborrelli (2016)       |
| G44045a | TrGC   | LHMVKABO2 + HO <sub>2</sub> $\rightarrow$ OH + HOCH <sub>2</sub> CHO + CH <sub>3</sub> C(O)                                                                                          | KR02H02(4)*.88*rcoch2o2_oh                                                       | Taraborrelli (2016)       |
| G44045b | TrGC   | LHMVKABO2 + HO <sub>2</sub> $\rightarrow$ LHMVKABOOH                                                                                                                                 | KR02H02(4)*(.12+.88*rcoch2o2_ooH)                                                | Taraborrelli (2016)       |
| G44046a | TrGCN  | LHMVKABO2 + NO $\rightarrow$ .12 MGLYOX + .12 HO <sub>2</sub> + .88 HOCH <sub>2</sub> CHO + .88 CH <sub>3</sub> C(O) + .12 HCHO + NO <sub>2</sub>                                    | KR02N0*(1-(.12*alpha_AN(6,1,0,1,0,temp,cair))+.88*alpha_AN(6,2,1,0,0,temp,cair)) | Taraborrelli (2016)       |
| G44046b | TrGCN  | LHMVKABO2 + NO $\rightarrow$ MVKNO3                                                                                                                                                  | KR02N0*(.12*alpha_AN(6,1,0,1,0,temp,cair)+.88*alpha_AN(6,2,1,0,0,temp,cair))     | Taraborrelli (2016)*      |
| G44047  | TrGCN  | LHMVKABO2 + NO <sub>3</sub> $\rightarrow$ .12 MGLYOX + .12 HO <sub>2</sub> + .88 HOCH <sub>2</sub> CHO + .88 CH <sub>3</sub> C(O) + .12 HCHO + .12 HO <sub>2</sub> + NO <sub>2</sub> | KR02N03                                                                          | Taraborrelli (2016)       |
| G44048a | TrGC   | LHMVKABOOH + OH $\rightarrow$ LHMVKABO2                                                                                                                                              | 0.6*k_CH300H_OH                                                                  | Taraborrelli (2016)       |
| G44048b | TrGC   | LHMVKABOOH + OH $\rightarrow$ .12 CO2H3CHO + .88 BIACETOH + OH                                                                                                                       | (.12*k_s*f_sooH*f_pch2oh+.88*k_t*f_tooh*f_pch2oh*f_co)                           | Taraborrelli (2016)       |
| G44049a | TrGC   | CO2H3CHO + OH $\rightarrow$ CO2H3CO3                                                                                                                                                 | k_t*f_o*f_alk                                                                    | Taraborrelli (2016)       |
| G44049b | TrGC   | CO2H3CHO + OH $\rightarrow$ CH <sub>3</sub> COCOCHO + HO <sub>2</sub> + H <sub>2</sub> O                                                                                             | k_t*f_co*f_toh*f_cho                                                             | Taraborrelli (2016)       |
| G44050  | TrGCN  | CO2H3CHO + NO <sub>3</sub> $\rightarrow$ CO2H3CO3 + HNO <sub>3</sub>                                                                                                                 | KN03AL*4.0                                                                       | Rickard and Pascoe (2009) |
| G44051  | TrGC   | CO2H3CO3 $\rightarrow$ MGLYOX + HO <sub>2</sub> + CO <sub>2</sub>                                                                                                                    | k1_R02RC03                                                                       | Taraborrelli (2016)       |
| G44052a | TrGC   | CO2H3CO3 + HO <sub>2</sub> $\rightarrow$ OH + MGLYOX + HO <sub>2</sub> + CO <sub>2</sub>                                                                                             | KAPH02*rco3_oh                                                                   | Taraborrelli (2016)       |
| G44052b | TrGC   | CO2H3CO3 + HO <sub>2</sub> $\rightarrow$ CO2H3CO2H + O <sub>3</sub>                                                                                                                  | KAPH02*rco3_o3                                                                   | Taraborrelli (2016)       |
| G44052c | TrGC   | CO2H3CO3 + HO <sub>2</sub> $\rightarrow$ CO2H3CO3H                                                                                                                                   | KAPH02*rco3_ooH                                                                  | Taraborrelli (2016)       |
| G44053  | TrGCN  | CO2H3CO3 + NO $\rightarrow$ MGLYOX + HO <sub>2</sub> + NO <sub>2</sub> + CO <sub>2</sub>                                                                                             | KAPNO                                                                            | Taraborrelli (2016)       |
| G44054  | TrGCN  | CO2H3CO3 + NO <sub>3</sub> $\rightarrow$ MGLYOX + HO <sub>2</sub> + NO <sub>2</sub> + CO <sub>2</sub>                                                                                | KR02N03*1.60                                                                     | Taraborrelli (2016)       |
| G44055a | TrGC   | CO2H3CO3H + OH $\rightarrow$ CO2H3CO3                                                                                                                                                | 0.6*k_CH300H_OH                                                                  | Taraborrelli (2016)       |
| G44055b | TrGC   | CO2H3CO3H + OH $\rightarrow$ CH <sub>3</sub> C(O) + CO + CO <sub>2</sub> + OH                                                                                                        | (k_t*f_co2h*f_co*f_toh)                                                          | Taraborrelli (2016)       |
| G44056  | TrGC   | CO2H3CO2H + OH $\rightarrow$ CH3COCOCO2H + HO <sub>2</sub>                                                                                                                           | k_t*f_co2h*f_co*f_toh+k_co2h                                                     | Taraborrelli (2016)       |
| G44057a | TrGC   | HO12CO3C4 + OH $\rightarrow$ BIACETOH + HO <sub>2</sub>                                                                                                                              | k_t*f_toh*f_alk*f_co                                                             | Taraborrelli (2016)       |
| G44057b | TrGC   | HO12CO3C4 + OH $\rightarrow$ CO2H3CHO + HO <sub>2</sub>                                                                                                                              | k_s*f_soh*f_alk                                                                  | Taraborrelli (2016)       |
| G44058  | TrGC   | MACO2 $\rightarrow$ .65 CH <sub>3</sub> + .65 CO + .65 HCHO + .35 OH + .35 CH <sub>3</sub> COCH <sub>2</sub> O <sub>2</sub> + CO <sub>2</sub>                                        | KDEC                                                                             | Taraborrelli (2016)       |
| G44059  | TrGC   | LHMVKABO2 $\rightarrow$ .88 MGLYOX + .88 HCHO + .12 HOOCH2CHO + .12 CH <sub>3</sub> C(O) + OH                                                                                        | KHSD                                                                             | Taraborrelli (2016)       |

Table 1: Gas phase reactions (... continued)

| #       | labels | reaction                                                                                                                        | rate coefficient             | reference                                         |
|---------|--------|---------------------------------------------------------------------------------------------------------------------------------|------------------------------|---------------------------------------------------|
| G44060  | TrGC   | MACRO2 $\rightarrow$ MGLYOX + HCHO + OH                                                                                         | KHSB                         | Taraborrelli (2016)                               |
| G44061a | TrGCN  | MVKNO3 + OH $\rightarrow$ MGLYOX + CO <sub>2</sub> + HO <sub>2</sub> + NO <sub>2</sub> + H <sub>2</sub> O                       | k_s*f_sooh*f_ch2ono2+k_rohro | Taraborrelli (2016)*                              |
| G44061b | TrGCN  | MVKNO3 + OH $\rightarrow$ BIACETOH + NO <sub>2</sub> + H <sub>2</sub> O                                                         | k_t*f_ono2*f_co*f_pch2oh     | Taraborrelli (2016)*                              |
| G44062a | TrGCN  | MACRN + OH $\rightarrow$ CH <sub>3</sub> COCH <sub>2</sub> OH + CO <sub>2</sub> + NO <sub>2</sub> + H <sub>2</sub> O            | k_t*f_o*f_ch2ono2            | Taraborrelli (2016)*                              |
| G44062b | TrGCN  | MACRN + OH $\rightarrow$ MGLYOX + CO + NO <sub>2</sub> + H <sub>2</sub> O                                                       | k_rohro+k_s*f_sooh*f_ch2ono2 | Taraborrelli (2016)*                              |
| G44063  | TrGC   | MACRO2 $\rightarrow$ CH <sub>3</sub> COCH <sub>2</sub> OH + OH + CO                                                             | K14HSAL                      | Taraborrelli (2016)                               |
| G44064  | TrGC   | EZCH3CO2CHCHO $\rightarrow$ .9 CH <sub>3</sub> COCHCO + .1 CH <sub>3</sub> C(O) + .01 GLYOX + .18 CO + .09 HO <sub>2</sub> + OH | K15HS24VYNAL                 | Taraborrelli (2016)                               |
| G44065  | TrGC   | EZCH3CO2CHCHO + HO <sub>2</sub> $\rightarrow$ CH <sub>3</sub> COOHCHCHO                                                         | KR02H02(4)                   | Taraborrelli (2016)                               |
| G44066  | TrGCN  | EZCH3CO2CHCHO + NO $\rightarrow$ CH <sub>3</sub> COCHO <sub>2</sub> CHO + NO <sub>2</sub>                                       | KR02N0                       | Taraborrelli (2016)*                              |
| G44067  | TrGCN  | EZCH3CO2CHCHO + NO <sub>3</sub> $\rightarrow$ CH <sub>3</sub> COCHO <sub>2</sub> CHO + NO <sub>2</sub>                          | kR02N03                      | Taraborrelli (2016)                               |
| G44068  | TrGC   | EZCH3CO2CHCHO $\rightarrow$ CH <sub>3</sub> COCHO <sub>2</sub> CHO                                                              | k1_R02s0R02                  | Taraborrelli (2016)                               |
| G44069  | TrGC   | EZCHOCCH3CHO2 $\rightarrow$ HCOCCH <sub>3</sub> CO + OH                                                                         | K15HS24VYNAL                 | Taraborrelli (2016)                               |
| G44070  | TrGCN  | EZCHOCCH3CHO2 + NO $\rightarrow$ HCOCO <sub>2</sub> CH <sub>3</sub> CHO + NO <sub>2</sub>                                       | KR02N0                       | Taraborrelli (2016)*                              |
| G44071  | TrGC   | EZCHOCCH3CHO2 + HO <sub>2</sub> $\rightarrow$ HCOCCH <sub>3</sub> CHOOH                                                         | KR02H02(4)                   | Taraborrelli (2016)                               |
| G44072  | TrGCN  | EZCHOCCH3CHO2 + NO <sub>3</sub> $\rightarrow$ HCOCO <sub>2</sub> CH <sub>3</sub> CHO + NO <sub>2</sub>                          | KR02N03                      | Taraborrelli (2016)                               |
| G44073  | TrGC   | EZCHOCCH3CHO2 $\rightarrow$ HCOCO <sub>2</sub> CH <sub>3</sub> CHO                                                              | k1_R02p0R02                  | Taraborrelli (2016)                               |
| G44074  | TrGC   | CH <sub>3</sub> COOHCHCHO $\rightarrow$ CH <sub>3</sub> COCHO <sub>2</sub> CHO + OH                                             | KHYDEC                       | Taraborrelli (2016)                               |
| G44075  | TrGC   | HCOCCH <sub>3</sub> CHOOH $\rightarrow$ HCOCO <sub>2</sub> CH <sub>3</sub> CHO + OH                                             | KHYDEC                       | Taraborrelli (2016)                               |
| G44076  | TrGCN  | CH <sub>3</sub> COCHO <sub>2</sub> CHO + NO $\rightarrow$ CH <sub>3</sub> C(O) + GLYOX + NO <sub>2</sub>                        | KR02N0                       | Taraborrelli (2016)*                              |
| G44077  | TrGCN  | CH <sub>3</sub> COCHO <sub>2</sub> CHO + NO <sub>3</sub> $\rightarrow$ CH <sub>3</sub> C(O) + GLYOX + NO <sub>2</sub>           | KR02N03                      | Taraborrelli (2016)                               |
| G44078  | TrGC   | CH <sub>3</sub> COCHO <sub>2</sub> CHO + HO <sub>2</sub> $\rightarrow$ CH <sub>3</sub> C(O) + GLYOX + OH                        | KR02H02(4)                   | Taraborrelli (2016)*                              |
| G44079  | TrGC   | CH <sub>3</sub> COCHO <sub>2</sub> CHO $\rightarrow$ CH <sub>3</sub> C(O) + GLYOX                                               | k1_R02s0R02                  | Taraborrelli (2016)                               |
| G44080  | TrGC   | HCOCO <sub>2</sub> CH <sub>3</sub> CHO $\rightarrow$ MGLYOX + CO + HO <sub>2</sub>                                              | k1_R02t0R02                  | Taraborrelli (2016)                               |
| G44081  | TrGCN  | HCOCO <sub>2</sub> CH <sub>3</sub> CHO + NO $\rightarrow$ MGLYOX + CO + HO <sub>2</sub> + NO <sub>2</sub>                       | KR02N0                       | Taraborrelli (2016)*                              |
| G44082  | TrGC   | HCOCO <sub>2</sub> CH <sub>3</sub> CHO + HO <sub>2</sub> $\rightarrow$ MGLYOX + CO + HO <sub>2</sub> + OH                       | KR02H02(4)                   | Taraborrelli (2016)*                              |
| G44083  | TrGCN  | HCOCO <sub>2</sub> CH <sub>3</sub> CHO + NO <sub>3</sub> $\rightarrow$ MGLYOX + CO + HO <sub>2</sub> + NO <sub>2</sub>          | KR02N03                      | Taraborrelli (2016)                               |
| G44084  | TrGC   | HCOCCH <sub>3</sub> CO + OH $\rightarrow$ CO + MGLYOX + HO <sub>2</sub>                                                         | 1E-10*a_cho                  | Hatakeyama et al. (1985),<br>Taraborrelli (2016)  |
| G44085  | TrGC   | CH <sub>3</sub> COCHCO + OH $\rightarrow$ CO + MGLYOX + HO <sub>2</sub>                                                         | 7.6E-11*a_coch3              | Hatakeyama et al. (1985),<br>Taraborrelli (2016)* |

Table 1: Gas phase reactions (... continued)

| #       | labels | reaction                                                                                                                                                        | rate coefficient                                     | reference                                    |
|---------|--------|-----------------------------------------------------------------------------------------------------------------------------------------------------------------|------------------------------------------------------|----------------------------------------------|
| G44086  | TrGCN  | LMEKNO3 + OH → .62 MGLYOX + .62 HCHO + .62 HO <sub>2</sub> + .62 NO <sub>2</sub> + .38 CH <sub>3</sub> C(O) + .38 NO <sub>3</sub> CH <sub>2</sub> CHO           | .62*(k_p*(f_co+f_ch2ono2)) +.38*(k_s*f_ch2ono2*f_co) | Taraborrelli (2016)*                         |
| G44087  | TrGC   | MEPROPENE + OH → IBUTOLBO2                                                                                                                                      | 9.4E-12*EXP(505./temp)                               | Atkinson et al. (2006)                       |
| G44088a | TrGC   | MEPROPENE + O <sub>3</sub> → CH <sub>3</sub> COCH <sub>3</sub> + CH <sub>2</sub> OO*                                                                            | 2.7E-15*EXP(-1630./temp)*0.33                        | Atkinson et al. (2006), Taraborrelli (2016)  |
| G44088b | TrGC   | MEPROPENE + O <sub>3</sub> → CH <sub>3</sub> COCH <sub>2</sub> O <sub>2</sub> + OH + HCHO                                                                       | 2.7E-15*EXP(-1630./temp)*0.67                        | Atkinson et al. (2006), Taraborrelli (2016)  |
| G44089  | TrGCN  | MEPROPENE + NO <sub>3</sub> → CH <sub>3</sub> COCH <sub>3</sub> + HCHO + NO <sub>2</sub>                                                                        | 3.4E-13                                              | Atkinson et al. (2006), Taraborrelli (2016)* |
| G44090  | TrGC   | IBUTOLBO2 → CH <sub>3</sub> COCH <sub>3</sub> + HCHO + HO <sub>2</sub>                                                                                          | k1_R02t0R02                                          | Taraborrelli (2016)                          |
| G44091a | TrGC   | IBUTOLBO2 + HO <sub>2</sub> → IBUTOLBOOH                                                                                                                        | KR02H02(4)*rcoch2o2_ooH                              | Taraborrelli (2016)                          |
| G44091b | TrGC   | IBUTOLBO2 + HO <sub>2</sub> → CH <sub>3</sub> COCH <sub>3</sub> + HCHO + HO <sub>2</sub> + OH                                                                   | KR02H02(4)*rcoch2o2_oh                               | Taraborrelli (2016)                          |
| G44092a | TrGCN  | IBUTOLBO2 + NO → CH <sub>3</sub> COCH <sub>3</sub> + HCHO + HO <sub>2</sub> + NO <sub>2</sub>                                                                   | KR02NO*(1.-alpha_AN(5,3,0,0,0, temp, cair))          | Taraborrelli (2016)                          |
| G44092b | TrGCN  | IBUTOLBO2 + NO → IBUTOLBNO3                                                                                                                                     | KR02NO*alpha_AN(5,3,0,0,0, temp, cair)               | Taraborrelli (2016)                          |
| G44093  | TrGCN  | IBUTOLBO2 + NO <sub>3</sub> → CH <sub>3</sub> COCH <sub>3</sub> + HCHO + HO <sub>2</sub> + NO <sub>2</sub>                                                      | KR02NO3                                              | Taraborrelli (2016)                          |
| G44094a | TrGC   | IBUTOLBOOH + OH → IBUTOLBO2                                                                                                                                     | .6*k_CH300H_OH                                       | Taraborrelli (2016)                          |
| G44094b | TrGC   | IBUTOLBOOH + OH → CH <sub>3</sub> COCH <sub>3</sub> + HCHO + HO <sub>2</sub>                                                                                    | k_s*f_sooH*f_pch2oh                                  | Taraborrelli (2016)                          |
| G44095  | TrGCN  | IBUTOLBNO3 + OH → CH <sub>3</sub> COCH <sub>3</sub> + HCHO + HO <sub>2</sub> + NO <sub>2</sub>                                                                  | 3.*k_p                                               | Taraborrelli (2016)                          |
| G44096  | TrGC   | BUT1ENE + OH → LBUT1ENO2                                                                                                                                        | 6.6E-12*EXP(465./temp)                               | Atkinson et al. (2006)*                      |
| G44097a | TrGC   | BUT1ENE + O <sub>3</sub> → HCHO + .5 C <sub>2</sub> H <sub>5</sub> CHO + .5 H <sub>2</sub> O <sub>2</sub> + .5 CH <sub>3</sub> CHO + .5 CO + .5 HO <sub>2</sub> | 3.35E-15*EXP(-1745./temp)*.57                        | Atkinson et al. (2006), Taraborrelli (2016)* |
| G44097b | TrGC   | BUT1ENE + O <sub>3</sub> → C <sub>2</sub> H <sub>5</sub> CHO + CH <sub>2</sub> OO*                                                                              | 3.35E-15*EXP(-1745./temp)*.43                        | Atkinson et al. (2006), Taraborrelli (2016)* |
| G44098  | TrGCN  | BUT1ENE + NO <sub>3</sub> → C <sub>2</sub> H <sub>5</sub> CHO + HCHO + NO <sub>2</sub>                                                                          | 3.2E-13*EXP(-950./temp)                              | Atkinson et al. (2006), Taraborrelli (2016)* |
| G44099  | TrGC   | LBUT1ENO2 → C <sub>2</sub> H <sub>5</sub> CHO + HCHO + HO <sub>2</sub>                                                                                          | k1_R02s0R02                                          | Taraborrelli (2016)                          |
| G44100a | TrGC   | LBUT1ENO2 + HO <sub>2</sub> → LBUT1ENOOH                                                                                                                        | KR02H02(4)*rcoch2o2_ooH                              | Taraborrelli (2016)                          |
| G44100b | TrGC   | LBUT1ENO2 + HO <sub>2</sub> → C <sub>2</sub> H <sub>5</sub> CHO + HCHO + HO <sub>2</sub> + OH                                                                   | KR02H02(4)*rcoch2o2_oh                               | Taraborrelli (2016)                          |



Table 1: Gas phase reactions (... continued)

| #       | labels | reaction                                                                                                                                                                                                                                                | rate coefficient                                                                               | reference                                    |
|---------|--------|---------------------------------------------------------------------------------------------------------------------------------------------------------------------------------------------------------------------------------------------------------|------------------------------------------------------------------------------------------------|----------------------------------------------|
| G44101a | TrGCN  | $\text{LBUT1ENO2} + \text{NO} \rightarrow \text{C}_2\text{H}_5\text{CHO} + \text{HCHO} + \text{HO}_2 + \text{NO}_2$                                                                                                                                     | $\text{KRO2N0}*(1.-\text{alpha\_AN}(5,2,0,0,0, \text{temp, cair}))$                            | Taraborrelli (2016)                          |
| G44101b | TrGCN  | $\text{LBUT1ENO2} + \text{NO} \rightarrow \text{LBUT1ENNO3}$                                                                                                                                                                                            | $\text{KRO2N0}*\text{alpha\_AN}(5,2,0,0,0, \text{temp, cair})$                                 | Taraborrelli (2016)                          |
| G44102  | TrGCN  | $\text{LBUT1ENO2} + \text{NO}_3 \rightarrow \text{C}_2\text{H}_5\text{CHO} + \text{HCHO} + \text{HO}_2 + \text{NO}_2$                                                                                                                                   | $\text{KRO2N03}$                                                                               | Taraborrelli (2016)                          |
| G44103a | TrGC   | $\text{LBUT1ENOOH} + \text{OH} \rightarrow \text{LBUT1ENO2}$                                                                                                                                                                                            | $.6*k\_CH300H\_OH$                                                                             | Taraborrelli (2016)                          |
| G44103b | TrGC   | $\text{LBUT1ENOOH} + \text{OH} \rightarrow \text{C}_2\text{H}_5\text{CO}_3 + \text{HCHO} + \text{HO}_2$                                                                                                                                                 | $k\_t*f\_tooh*f\_pch2oh$                                                                       | Taraborrelli (2016)*                         |
| G44104  | TrGCN  | $\text{LBUT1ENNO3} + \text{OH} \rightarrow \text{C}_2\text{H}_5\text{CHO} + \text{CO} + \text{HO}_2 + \text{NO}_2$                                                                                                                                      | $k\_s*f\_soh*f\_ch2ono2$                                                                       | Taraborrelli (2016)*                         |
| G44105  | TrGC   | $\text{CBUT2ENE} + \text{OH} \rightarrow \text{BUT2OLO2}$                                                                                                                                                                                               | $1.1\text{E}-11*\text{EXP}(485./\text{temp})$                                                  | Atkinson et al. (2006)                       |
| G44106  | TrGC   | $\text{CBUT2ENE} + \text{O}_3 \rightarrow \text{CH}_3\text{CHO} + .16 \text{CH}_3\text{CHOHOOH} + .50 \text{OH} + .50 \text{HCOCH}_2\text{O}_2 + .05 \text{CH}_2\text{CO} + .09 \text{CH}_3\text{OH} + .09 \text{CO} + .2 \text{CH}_4 + .2 \text{CO}_2$ | $3.2\text{E}-15*\text{EXP}(-965./\text{temp})$                                                 | Atkinson et al. (2006), Taraborrelli (2016)* |
| G44107  | TrGCN  | $\text{CBUT2ENE} + \text{NO}_3 \rightarrow 2 \text{CH}_3\text{CHO} + \text{NO}_2$                                                                                                                                                                       | $3.5\text{E}-13$                                                                               | Atkinson et al. (2006), Taraborrelli (2016)* |
| G44108  | TrGC   | $\text{TBUT2ENE} + \text{OH} \rightarrow \text{BUT2OLO2}$                                                                                                                                                                                               | $1.0\text{E}-11*\text{EXP}(553./\text{temp})$                                                  | Atkinson et al. (2006)                       |
| G44109  | TrGC   | $\text{TBUT2ENE} + \text{O}_3 \rightarrow \text{CH}_3\text{CHO} + .16 \text{CH}_3\text{CHOHOOH} + .50 \text{OH} + .50 \text{HCOCH}_2\text{O}_2 + .05 \text{CH}_2\text{CO} + .09 \text{CH}_3\text{OH} + .09 \text{CO} + .2 \text{CH}_4 + .2 \text{CO}_2$ | $6.6\text{E}-15*\text{EXP}(-1060./\text{temp})$                                                | Atkinson et al. (2006), Taraborrelli (2016)  |
| G44110  | TrGCN  | $\text{TBUT2ENE} + \text{NO}_3 \rightarrow 2 \text{CH}_3\text{CHO} + \text{NO}_2$                                                                                                                                                                       | $1.78\text{E}-12*\text{EXP}(-530./\text{temp}) + 1.28\text{E}-14*\text{EXP}(570./\text{temp})$ | Atkinson et al. (2006), Taraborrelli (2016)* |
| G44111  | TrGC   | $\text{BUT2OLO2} \rightarrow \text{C}_2\text{H}_5\text{CHO} + \text{HCHO} + \text{HO}_2$                                                                                                                                                                | $k1\_R02s0R02$                                                                                 | Taraborrelli (2016)                          |
| G44112a | TrGC   | $\text{BUT2OLO2} + \text{HO}_2 \rightarrow \text{BUT2OLOOH}$                                                                                                                                                                                            | $\text{KRO2H02}(4)*\text{rcoch2o2\_ooh}$                                                       | Taraborrelli (2016)                          |
| G44112b | TrGC   | $\text{BUT2OLO2} + \text{HO}_2 \rightarrow 2 \text{CH}_3\text{CHO} + \text{HO}_2 + \text{OH}$                                                                                                                                                           | $\text{KRO2H02}(4)*\text{rcoch2o2\_oh}$                                                        | Taraborrelli (2016)                          |
| G44113a | TrGCN  | $\text{BUT2OLO2} + \text{NO} \rightarrow 2 \text{CH}_3\text{CHO} + \text{HO}_2 + \text{NO}_2$                                                                                                                                                           | $\text{KRO2N0}*(1.-\text{alpha\_AN}(5,2,0,0,0, \text{temp, cair}))$                            | Taraborrelli (2016)                          |
| G44113b | TrGCN  | $\text{BUT2OLO2} + \text{NO} \rightarrow \text{BUT2OLNO3}$                                                                                                                                                                                              | $\text{KRO2N0}*\text{alpha\_AN}(5,2,0,0,0, \text{temp, cair})$                                 | Taraborrelli (2016)                          |
| G44114  | TrGCN  | $\text{BUT2OLO2} + \text{NO}_3 \rightarrow 2 \text{CH}_3\text{CHO} + \text{HO}_2 + \text{NO}_2$                                                                                                                                                         | $\text{KRO2N03}$                                                                               | Taraborrelli (2016)                          |
| G44115a | TrGC   | $\text{BUT2OLOOH} + \text{OH} \rightarrow \text{BUT2OLO2}$                                                                                                                                                                                              | $.6*k\_CH300H\_OH$                                                                             | Taraborrelli (2016)                          |
| G44115b | TrGC   | $\text{BUT2OLOOH} + \text{OH} \rightarrow \text{LMEKOOH} + \text{HO}_2$                                                                                                                                                                                 | $k\_t*f\_toh*f\_pch2oh$                                                                        | Taraborrelli (2016)                          |
| G44115c | TrGC   | $\text{BUT2OLOOH} + \text{OH} \rightarrow \text{BUT2OLO} + \text{OH}$                                                                                                                                                                                   | $k\_t*f\_tooh*f\_pch2oh$                                                                       | Taraborrelli (2016)                          |
| G44116  | TrGCN  | $\text{BUT2OLNO3} + \text{OH} \rightarrow \text{LMEKNO3} + \text{HO}_2$                                                                                                                                                                                 | $k\_t*f\_toh*f\_ch2ono2$                                                                       | Taraborrelli (2016)                          |
| G44117  | TrGC   | $\text{BUT2OLO} + \text{OH} \rightarrow \text{BIACET} + \text{HO}_2$                                                                                                                                                                                    | $k\_t*f\_toh*f\_co$                                                                            | Taraborrelli (2016)                          |
| G44118  | TrGC   | $\text{IPRCHO} + \text{OH} \rightarrow \text{IPRCO3} + \text{H}_2\text{O}$                                                                                                                                                                              | $6.8\text{E}-12*\text{EXP}(410./\text{temp})$                                                  | Atkinson et al. (2006)                       |

Table 1: Gas phase reactions (... continued)

| #       | labels | reaction                                                                                                | rate coefficient                                       | reference                                                       |
|---------|--------|---------------------------------------------------------------------------------------------------------|--------------------------------------------------------|-----------------------------------------------------------------|
| G44119  | TrGCN  | $\text{IPRCHO} + \text{NO}_3 \rightarrow \text{IPRCO}_3 + \text{HNO}_3$                                 | $1.67\text{E}-12 \cdot \text{EXP}(-1460./\text{temp})$ | Atkinson et al. (2006)                                          |
| G44120  | TrGC   | $\text{IPRCO}_3 \rightarrow \text{iC}_3\text{H}_7\text{O}_2 + \text{CO}_2$                              | k1_R02RCO3                                             | Rickard and Pascoe (2009)                                       |
| G44121a | TrGC   | $\text{IPRCO}_3 + \text{HO}_2 \rightarrow \text{PERIBUACID}$                                            | KAPH02*rc03_ooh                                        | Rickard and Pascoe (2009), Taraborrelli (2016)                  |
| G44121b | TrGC   | $\text{IPRCO}_3 + \text{HO}_2 \rightarrow \text{iC}_3\text{H}_7\text{O}_2 + \text{CO}_2 + \text{OH}$    | KAPH02*(1-rc03_ooh)                                    | Rickard and Pascoe (2009), Taraborrelli (2016)                  |
| G44122  | TrGCN  | $\text{IPRCO}_3 + \text{NO}_2 \rightarrow \text{PIP}_N$                                                 | k_CH3CO3_NO2                                           | Rickard and Pascoe (2009)                                       |
| G44123  | TrGCN  | $\text{IPRCO}_3 + \text{NO} \rightarrow \text{iC}_3\text{H}_7\text{O}_2 + \text{CO}_2 + \text{NO}_2$    | KAPNO                                                  | Rickard and Pascoe (2009)                                       |
| G44124a | TrGC   | $\text{PERIBUACID} + \text{OH} \rightarrow \text{IPRCO}_3 + \text{H}_2\text{O}$                         | .6*k_CH300H_OH                                         | Rickard and Pascoe (2009)                                       |
| G44124b | TrGC   | $\text{PERIBUACID} + \text{OH} \rightarrow \text{CH}_3\text{COCH}_3 + \text{H}_2\text{O} + \text{CO}_2$ | k_sf_co2h                                              | Taraborrelli (2016)*                                            |
| G44125  | TrGCN  | $\text{PIP}_N \rightarrow \text{IPRCO}_3 + \text{NO}_2$                                                 | k_PAN_M                                                | Rickard and Pascoe (2009)                                       |
| G44126  | TrGCN  | $\text{PIP}_N + \text{OH} \rightarrow \text{CH}_3\text{COCH}_3 + \text{CO}_2 + \text{NO}_2$             | k_sf_cpan                                              | Taraborrelli (2016)*                                            |
| G44127  | TrGC   | $\text{MPROPENOL} + \text{OH} \rightarrow \text{HCOOH} + \text{OH} + \text{CH}_3\text{COCH}_3$          | k_CH2CHOH_OH_HCOOH                                     | Taraborrelli (2016), So et al. (2014)*                          |
| G44128  | TrGC   | $\text{MPROPENOL} + \text{HCOOH} \rightarrow \text{IPRCHO} + \text{HCOOH}$                              | k_CH2CHOH_HCOOH                                        | Taraborrelli (2016), daSilva (2010)*                            |
| G44129  | TrGC   | $\text{IPRCHO} + \text{HCOOH} \rightarrow \text{MPROPENOL} + \text{HCOOH}$                              | k_ALD_HCOOH                                            | Taraborrelli (2016), daSilva (2010)*                            |
| G44130  | TrGC   | $\text{BUTENOL} + \text{OH} \rightarrow \text{HCOOH} + \text{OH} + \text{C}_2\text{H}_5\text{CHO}$      | k_CH2CHOH_OH_HCOOH                                     | Taraborrelli (2016), So et al. (2014)*                          |
| G44131  | TrGC   | $\text{BUTENOL} + \text{HCOOH} \rightarrow \text{C}_3\text{H}_7\text{CHO} + \text{HCOOH}$               | k_CH2CHOH_HCOOH                                        | Taraborrelli (2016), daSilva (2010)*                            |
| G44132  | TrGC   | $\text{C}_3\text{H}_7\text{CHO} + \text{HCOOH} \rightarrow \text{BUTENOL} + \text{HCOOH}$               | k_ALD_HCOOH                                            | Taraborrelli (2016), daSilva (2010)*                            |
| G44133  | TrGC   | $\text{HVMK} + \text{OH} \rightarrow \text{HCOOH} + \text{OH} + \text{MGLYOX}$                          | 8.8E-11                                                | Taraborrelli (2016), So et al. (2014), Messaadia et al. (2015)* |
| G44134  | TrGC   | $\text{HVMK} + \text{HCOOH} \rightarrow \text{CO}_2\text{C}_3\text{CHO} + \text{HCOOH}$                 | k_CH2CHOH_HCOOH                                        | Taraborrelli (2016), daSilva (2010)*                            |
| G44135  | TrGC   | $\text{CO}_2\text{C}_3\text{CHO} + \text{HCOOH} \rightarrow \text{HVMK} + \text{HCOOH}$                 | k_ALD_HCOOH                                            | Taraborrelli (2016), daSilva (2010)*                            |
| G44136  | TrGC   | $\text{HMAC} + \text{OH} \rightarrow \text{HCOOH} + \text{OH} + \text{MGLYOX}$                          | 8.8E-11                                                | Taraborrelli (2016), So et al. (2014), Messaadia et al. (2015)* |
| G44137  | TrGC   | $\text{HMAC} + \text{HCOOH} \rightarrow \text{IBUTDIAL} + \text{HCOOH}$                                 | k_CH2CHOH_HCOOH                                        | Taraborrelli (2016), daSilva (2010)*                            |

Table 1: Gas phase reactions (... continued)

| #       | labels   | reaction                                                                                                           | rate coefficient                 | reference                            |
|---------|----------|--------------------------------------------------------------------------------------------------------------------|----------------------------------|--------------------------------------|
| G44138  | TrGC     | IBUTDIAL + HCOOH → HMAc + HCOOH                                                                                    | k_ALD_HCOOH                      | Taraborrelli (2016), daSilva (2010)* |
| G44139  | TrGC     | CO2C3CHO + OH → CH <sub>3</sub> COCH <sub>2</sub> O <sub>2</sub> + CO <sub>2</sub> + H <sub>2</sub> O              | k_t*f_o*f_alk+k_s*f_cho*f_co     | Taraborrelli (2016)*                 |
| G44140  | TrGCN    | CO2C3CHO + NO <sub>3</sub> → CH <sub>3</sub> COCH <sub>2</sub> O <sub>2</sub> + CO <sub>2</sub> + HNO <sub>3</sub> | KN03AL*4.0                       | Taraborrelli (2016)*                 |
| G44141  | TrGC     | IBUTDIAL + OH → CH <sub>3</sub> CHO + CO + HO <sub>2</sub> + CO <sub>2</sub> + H <sub>2</sub> O                    | 2.*k_t*f_o*f_alk+k_t*f_cho*f_cho | Taraborrelli (2016)*                 |
| G44142  | TrGCN    | IBUTDIAL + NO <sub>3</sub> → CH <sub>3</sub> CHO + CO + HO <sub>2</sub> + CO <sub>2</sub> + HNO <sub>3</sub>       | 2.*KN03AL*4.0                    | Taraborrelli (2016)*                 |
| G44200  | TrGTerC  | CH <sub>3</sub> COCOCH <sub>2</sub> O <sub>2</sub> → CH <sub>3</sub> C(O) + HCHO + CO                              | k1_R02p0R02                      | Rickard and Pascoe (2009)            |
| G44201  | TrGTerC  | CH <sub>3</sub> COCOCH <sub>2</sub> O <sub>2</sub> + HO <sub>2</sub> → CH <sub>3</sub> COCOCH <sub>2</sub> OOH     | KR02H02(4)                       | Rickard and Pascoe (2009)            |
| G44202  | TrGTerCN | CH <sub>3</sub> COCOCH <sub>2</sub> O <sub>2</sub> + NO → CH <sub>3</sub> C(O) + HCHO + CO + NO <sub>2</sub>       | KR02NO                           | Rickard and Pascoe (2009)*           |
| G44203a | TrGTerC  | CH <sub>3</sub> COCOCH <sub>2</sub> OOH + OH → CH <sub>3</sub> COCOCHO + OH                                        | k_s*f_co*f_sooh                  | Rickard and Pascoe (2009)*           |
| G44203b | TrGTerC  | CH <sub>3</sub> COCOCH <sub>2</sub> OOH + OH → CH <sub>3</sub> COCOCH <sub>2</sub> O <sub>2</sub>                  | .6*k_CH300H_OH                   | Rickard and Pascoe (2009)            |
| G44204  | TrGTerC  | C44O2 + HO <sub>2</sub> → C44OOH                                                                                   | KR02H02(4)                       | Rickard and Pascoe (2009)            |
| G44205  | TrGTerCN | C44O2 + NO → HCOCH <sub>2</sub> CHO + CO <sub>2</sub> + HO <sub>2</sub> + NO <sub>2</sub>                          | KR02NO                           | Rickard and Pascoe (2009)*           |
| G44206  | TrGTerC  | C44O2 → HCOCH <sub>2</sub> CHO + CO <sub>2</sub> + HO <sub>2</sub>                                                 | k1_R02s0R02                      | Rickard and Pascoe (2009)            |
| G44207  | TrGTerC  | C44OOH + OH → C44O2                                                                                                | 7.46E-11                         | Rickard and Pascoe (2009)            |
| G44208  | TrGTerC  | CHOC3COO2 → HCOCH <sub>2</sub> CO3 + HCHO                                                                          | k1_R02p0R02                      | Rickard and Pascoe (2009)            |
| G44209  | TrGTerC  | CHOC3COO2 + HO <sub>2</sub> → C413COOOH                                                                            | KR02H02(4)                       | Rickard and Pascoe (2009)            |
| G44210  | TrGTerCN | CHOC3COO2 + NO → HCOCH <sub>2</sub> CO3 + HCHO + NO <sub>2</sub>                                                   | KR02NO                           | Rickard and Pascoe (2009)*           |
| G44211  | TrGTerC  | C413COOOH + OH → CHOC3COO2                                                                                         | 8.33E-11                         | Rickard and Pascoe (2009)            |
| G44212  | TrGTerC  | C4CODIAL + OH → C312COCO3                                                                                          | 3.39E-11                         | Rickard and Pascoe (2009)            |
| G44213  | TrGTerCN | C4CODIAL + NO <sub>3</sub> → C312COCO3 + HNO <sub>3</sub>                                                          | 2.*KN03AL*4.0                    | Rickard and Pascoe (2009)            |
| G44214  | TrGTerC  | C312COCO3 → HCOCOCH <sub>2</sub> O <sub>2</sub> + CO <sub>2</sub>                                                  | k1_R02RCO3                       | Rickard and Pascoe (2009)            |
| G44215a | TrGTerC  | C312COCO3 + HO <sub>2</sub> → C312COCO3H                                                                           | KAPH02*rco3_ooh                  | Rickard and Pascoe (2009)            |
| G44215b | TrGTerC  | C312COCO3 + HO <sub>2</sub> → HCOCOCH <sub>2</sub> O <sub>2</sub> + CO <sub>2</sub> + OH                           | KAPH02*(1-rco3_ooh)              | Rickard and Pascoe (2009)            |
| G44216  | TrGTerCN | C312COCO3 + NO <sub>2</sub> → C312COPAN                                                                            | k_CH3CO3_NO2                     | Rickard and Pascoe (2009)            |
| G44217  | TrGTerCN | C312COCO3 + NO → HCOCOCH <sub>2</sub> O <sub>2</sub> + CO <sub>2</sub> + NO <sub>2</sub>                           | KAPNO                            | Rickard and Pascoe (2009)            |
| G44218  | TrGTerC  | C312COCO3H + OH → C312COCO3                                                                                        | 1.63E-11                         | Rickard and Pascoe (2009)            |
| G44219  | TrGTerCN | C312COPAN → C312COCO3 + NO <sub>2</sub>                                                                            | k_PAN_M                          | Rickard and Pascoe (2009)            |
| G44220  | TrGTerCN | C312COPAN + OH → HCOCOCHO + CO + NO <sub>2</sub>                                                                   | 1.27E-11                         | Rickard and Pascoe (2009)            |
| G44221  | TrGTerC  | CH <sub>3</sub> COCOCHO + OH → CH <sub>3</sub> C(O) + 2 CO                                                         | 8.4E-13*EXP(830./temp)           | Taraborrelli (2016)*                 |
| G44222  | TrGTerCN | CH <sub>3</sub> COCOCHO + NO <sub>3</sub> → CH <sub>3</sub> C(O) + 2 CO + HNO <sub>3</sub>                         | KN03AL*4.0                       | Rickard and Pascoe (2009)            |
| G44223  | TrGTerC  | IBUTALOH + OH → IPRHOCO3                                                                                           | 1.4E-11                          | Rickard and Pascoe (2009)            |

Table 1: Gas phase reactions (... continued)

| #       | labels   | reaction                                                                                                                                    | rate coefficient                | reference                                      |
|---------|----------|---------------------------------------------------------------------------------------------------------------------------------------------|---------------------------------|------------------------------------------------|
| G44224a | TrGTerC  | $\text{IPRHOCO3} + \text{HO}_2 \rightarrow \text{CH}_3\text{COCH}_3 + \text{CO}_2 + \text{HO}_2 + \text{OH}$                                | KAPH02* <i>rco3_oh</i>          | Rickard and Pascoe (2009), Taraborrelli (2016) |
| G44224b | TrGTerC  | $\text{IPRHOCO3} + \text{HO}_2 \rightarrow \text{IPRHOCO2H} + \text{O}_3$                                                                   | KAPH02* <i>rco3_o3</i>          | Rickard and Pascoe (2009), Taraborrelli (2016) |
| G44224c | TrGTerC  | $\text{IPRHOCO3} + \text{HO}_2 \rightarrow \text{IPRHOCO3H}$                                                                                | KAPH02* <i>rco3_ooh</i>         | Rickard and Pascoe (2009), Taraborrelli (2016) |
| G44225  | TrGTerCN | $\text{IPRHOCO3} + \text{NO} \rightarrow \text{CH}_3\text{COCH}_3 + \text{CO}_2 + \text{HO}_2 + \text{NO}_2$                                | KAPNO                           | Rickard and Pascoe (2009)                      |
| G44226  | TrGTerCN | $\text{IPRHOCO3} + \text{NO}_2 \rightarrow \text{C4PAN5}$                                                                                   | k_CH3C03_NO2                    | Rickard and Pascoe (2009)                      |
| G44227  | TrGTerCN | $\text{IPRHOCO3} + \text{NO}_3 \rightarrow \text{CH}_3\text{COCH}_3 + \text{CO}_2 + \text{HO}_2 + \text{NO}_2$                              | KR02N03*1.74                    | Rickard and Pascoe (2009)                      |
| G44228a | TrGTerC  | $\text{IPRHOCO3} \rightarrow \text{CH}_3\text{COCH}_3 + \text{CO}_2 + \text{HO}_2$                                                          | k1_R02RC03*0.7                  | Rickard and Pascoe (2009)                      |
| G44228b | TrGTerC  | $\text{IPRHOCO3} \rightarrow \text{IPRHOCO2H}$                                                                                              | k1_R02RC03*0.3                  | Rickard and Pascoe (2009)                      |
| G44229  | TrGTerC  | $\text{IPRHOCO2H} + \text{OH} \rightarrow \text{CH}_3\text{COCH}_3 + \text{CO}_2 + \text{HO}_2 + \text{H}_2\text{O}$                        | 1.72E-12                        | Rickard and Pascoe (2009)                      |
| G44230  | TrGTerC  | $\text{OH} + \text{IPRHOCO3H} \rightarrow \text{IPRHOCO3}$                                                                                  | 4.80E-12                        | Rickard and Pascoe (2009)                      |
| G44231  | TrGTerCN | $\text{C4PAN5} \rightarrow \text{IPRHOCO3} + \text{NO}_2$                                                                                   | K_PAN_M                         | Rickard and Pascoe (2009)                      |
| G44232  | TrGTerCN | $\text{C4PAN5} + \text{OH} \rightarrow \text{CH}_3\text{COCH}_3 + \text{CO} + \text{NO}_2$                                                  | 4.75E-13                        | Rickard and Pascoe (2009)                      |
| G44233a | TrGTerC  | $\text{MBOOO} \rightarrow \text{IPRHOCO2H}$                                                                                                 | 1.60E-17*C(ind_H20)*(0.08+0.15) | Rickard and Pascoe (2009), Taraborrelli (2016) |
| G44233b | TrGTerC  | $\text{MBOOO} \rightarrow \text{IBUTALOH} + \text{H}_2\text{O}_2$                                                                           | 1.60E-17*C(ind_H20)*0.77        | Rickard and Pascoe (2009), Taraborrelli (2016) |
| G44234  | TrGTerC  | $\text{MBOOO} + \text{CO} \rightarrow \text{IBUTALOH} + \text{CO}_2$                                                                        | 1.20E-15                        | Rickard and Pascoe (2009)                      |
| G44235  | TrGTerCN | $\text{MBOOO} + \text{NO} \rightarrow \text{IBUTALOH} + \text{NO}_2$                                                                        | 1.00E-14                        | Rickard and Pascoe (2009)                      |
| G44236  | TrGTerCN | $\text{MBOOO} + \text{NO}_2 \rightarrow \text{IBUTALOH} + \text{NO}_3$                                                                      | 1.00E-15                        | Rickard and Pascoe (2009)                      |
| G44400  | TrGAroC  | $\text{MALANHY} + \text{OH} \rightarrow \text{MALANHYO2}$                                                                                   | 1.4E-12                         | Rickard and Pascoe (2009)                      |
| G44401a | TrGAroC  | $\text{MALDIALOOH} + \text{OH} \rightarrow \text{HOCOC4DIAL} + \text{OH}$                                                                   | 1.22E-10                        | Rickard and Pascoe (2009)                      |
| G44401b | TrGAroC  | $\text{MALDIALOOH} + \text{OH} \rightarrow \text{MALDIALO2}$                                                                                | 0.6*k_CH300H_OH                 | Rickard and Pascoe (2009)                      |
| G44402  | TrGAroCN | $\text{NC4DCO2H} + \text{OH} \rightarrow \text{MALANHY} + \text{NO}_2$                                                                      | 0.6*k_CH300H_OH                 | Rickard and Pascoe (2009)*                     |
| G44403  | TrGAroC  | $\text{CO14O3CO2H} + \text{OH} \rightarrow \text{HCOCH2O2} + 2 \text{CO}_2$                                                                 | 2.19E-11                        | Rickard and Pascoe (2009)                      |
| G44404  | TrGAroC  | $\text{BZFUOOH} + \text{OH} \rightarrow \text{BZFUO2}$                                                                                      | 3.68E-11                        | Rickard and Pascoe (2009)                      |
| G44405  | TrGAroC  | $\text{HOCOC4DIAL} + \text{OH} \rightarrow \text{CO2C4DIAL} + \text{HO}_2$                                                                  | 3.67E-11                        | Rickard and Pascoe (2009)                      |
| G44406a | TrGAroC  | $\text{MALDIALCO3} + \text{HO}_2 \rightarrow \text{MALDALCO2H} + \text{O}_3$                                                                | KAPH02* <i>rco3_o3</i>          | Rickard and Pascoe (2009)                      |
| G44406b | TrGAroC  | $\text{MALDIALCO3} + \text{HO}_2 \rightarrow \text{MALDALCO3H}$                                                                             | KAPH02* <i>rco3_ooh</i>         | Rickard and Pascoe (2009)                      |
| G44406c | TrGAroC  | $\text{MALDIALCO3} + \text{HO}_2 \rightarrow .6 \text{MALANHY} + \text{HO}_2 + .4 \text{GLYOX} + .4 \text{CO} + .4 \text{CO}_2 + \text{OH}$ | KAPH02* <i>rco3_oh</i>          | Rickard and Pascoe (2009)*                     |
| G44407  | TrGAroCN | $\text{MALDIALCO3} + \text{NO} \rightarrow .6 \text{MALANHY} + \text{HO}_2 + .4 \text{GLYOX} + .4 \text{CO} + .4 \text{CO}_2 + \text{NO}_2$ | KAPNO                           | Rickard and Pascoe (2009)*                     |

Table 1: Gas phase reactions (... continued)

| #       | labels   | reaction                                                                                                                                                                               | rate coefficient                         | reference                                      |
|---------|----------|----------------------------------------------------------------------------------------------------------------------------------------------------------------------------------------|------------------------------------------|------------------------------------------------|
| G44408  | TrGAroCN | MALDIALCO <sub>3</sub> + NO <sub>2</sub> → MALDIALPAN                                                                                                                                  | k_CH3C03_NO2                             | Rickard and Pascoe (2009)                      |
| G44409  | TrGAroCN | MALDIALCO <sub>3</sub> + NO <sub>3</sub> → .6 MALANHY + HO <sub>2</sub> + .4 GLYOX + .4 CO + .4 CO <sub>2</sub> + NO <sub>2</sub>                                                      | KR02N03*1.74                             | Rickard and Pascoe (2009)*                     |
| G44410  | TrGAroC  | MALDIALCO <sub>3</sub> → .6 MALANHY + HO <sub>2</sub> + .4 GLYOX + .4 CO + .4 CO <sub>2</sub>                                                                                          | k1_R02RC03                               | Rickard and Pascoe (2009)*                     |
| G44411  | TrGAroCN | BZFUONE + NO <sub>3</sub> → NBZFUO2                                                                                                                                                    | 3.00E-13                                 | Rickard and Pascoe (2009)                      |
| G44412  | TrGAroC  | BZFUONE + O <sub>3</sub> → .3125 CO14O3CO2H + .1875 CO14O3CHO + .1875 H <sub>2</sub> O <sub>2</sub> + .5 CO + .5 CO <sub>2</sub> + .5 HCOCH2O2 + .5 OH                                 | 2.20E-19                                 | see note*                                      |
| G44413  | TrGAroC  | BZFUONE + OH → BZFUO2                                                                                                                                                                  | 4.45E-11                                 | Rickard and Pascoe (2009)                      |
| G44414  | TrGAroCN | NBZFUOOH + OH → NBZFUO2                                                                                                                                                                | 6.18E-12                                 | Rickard and Pascoe (2009)                      |
| G44415  | TrGAroC  | MALDALCO3H + OH → MALDIALCO3                                                                                                                                                           | 4.00E-11                                 | Rickard and Pascoe (2009)                      |
| G44416  | TrGAroC  | EPXDLCO2H + OH → C3DIALO2 + CO <sub>2</sub>                                                                                                                                            | 2.31E-11                                 | Rickard and Pascoe (2009)                      |
| G44417a | TrGAroC  | EPXDLCO3 + HO <sub>2</sub> → C3DIALO2 + CO <sub>2</sub> + OH                                                                                                                           | KAPH02*rco3_oh                           | Rickard and Pascoe (2009)                      |
| G44417b | TrGAroC  | EPXDLCO3 + HO <sub>2</sub> → EPXDLCO2H + O <sub>3</sub>                                                                                                                                | KAPH02*rco3_o3                           | Rickard and Pascoe (2009)                      |
| G44417c | TrGAroC  | EPXDLCO3 + HO <sub>2</sub> → EPXDLCO3H                                                                                                                                                 | KAPH02*rco3_ooH                          | Rickard and Pascoe (2009)                      |
| G44418  | TrGAroCN | EPXDLCO3 + NO → C3DIALO2 + CO <sub>2</sub> + NO <sub>2</sub>                                                                                                                           | KAPNO                                    | Rickard and Pascoe (2009)                      |
| G44419  | TrGAroCN | EPXDLCO3 + NO <sub>2</sub> → EPXDLPAN                                                                                                                                                  | k_CH3C03_NO2                             | Rickard and Pascoe (2009)                      |
| G44420  | TrGAroCN | EPXDLCO3 + NO <sub>3</sub> → C3DIALO2 + CO <sub>2</sub> + NO <sub>2</sub>                                                                                                              | KR02N03*1.74                             | Rickard and Pascoe (2009)                      |
| G44421  | TrGAroC  | EPXDLCO3 → C3DIALO2 + CO <sub>2</sub>                                                                                                                                                  | k1_R02RC03                               | Rickard and Pascoe (2009)*                     |
| G44422  | TrGAroC  | MALNHYOHCO + OH → CO + CO + CO + CO <sub>2</sub> + HO <sub>2</sub>                                                                                                                     | 5.68E-12                                 | Rickard and Pascoe (2009)                      |
| G44423  | TrGAroCN | MALDIAL + NO <sub>3</sub> → MALDIALCO3 + HNO <sub>3</sub>                                                                                                                              | 2*KN03AL*2.0                             | Rickard and Pascoe (2009)                      |
| G44424  | TrGAroC  | MALDIAL + O <sub>3</sub> → 1.0675 GLYOX + .125 HCHO + .1125 HCOCO <sub>2</sub> H + .0675 H <sub>2</sub> O <sub>2</sub> + .82 HO <sub>2</sub> + .57 OH + 1.265 CO + .25 CO <sub>2</sub> | 2.00E-18                                 | Rickard and Pascoe (2009)*                     |
| G44425  | TrGAroC  | MALDIAL + OH → .83 MALDIALCO3 + .17 MALDIALO2                                                                                                                                          | 5.20E-11                                 | Rickard and Pascoe (2009)*                     |
| G44426  | TrGAroC  | MALANHYOOH + OH → MALNHYOHCO + OH                                                                                                                                                      | 4.66E-11                                 | Rickard and Pascoe (2009)                      |
| G44427  | TrGAroCN | MALDIALPAN + OH → GLYOX + CO + CO + NO <sub>2</sub>                                                                                                                                    | 3.70E-11                                 | Rickard and Pascoe (2009)                      |
| G44428  | TrGAroCN | MALDIALPAN → MALDIALCO3 + NO <sub>2</sub>                                                                                                                                              | k_PAN_M                                  | Rickard and Pascoe (2009)                      |
| G44429a | TrGAroC  | MALANHYO2 + HO <sub>2</sub> → MALANHYOOH                                                                                                                                               | KR02H02(4)*(1-rcoch2o2_oh-rchohch2o2_oh) | Rickard and Pascoe (2009), Taraborrelli (2016) |
| G44429b | TrGAroC  | MALANHYO2 + HO <sub>2</sub> → HCOCOHC03 + CO <sub>2</sub> + OH                                                                                                                         | KR02H02(4)*(rcoch2o2_oh+rchohch2o2_oh)   | Rickard and Pascoe (2009), Taraborrelli (2016) |
| G44430  | TrGAroCN | MALANHYO2 + NO → HCOCOHC03 + CO <sub>2</sub> + NO <sub>2</sub>                                                                                                                         | KR02N0                                   | Rickard and Pascoe (2009)*                     |

Table 1: Gas phase reactions (... continued)

| #       | labels   | reaction                                                                                                           | rate coefficient                         | reference                                         |
|---------|----------|--------------------------------------------------------------------------------------------------------------------|------------------------------------------|---------------------------------------------------|
| G44431  | TrGAroCN | MALANHYO2 + NO <sub>3</sub> → HCOCOHCO3 + CO <sub>2</sub> + NO <sub>2</sub>                                        | KR02N03                                  | Rickard and Pascoe (2009)*                        |
| G44432  | TrGAroC  | MALANHYO2 → HCOCOHCO3 + CO <sub>2</sub>                                                                            | k1_R02s0R02                              | Rickard and Pascoe (2009)*                        |
| G44433  | TrGAroC  | EPXDLCO3H + OH → EPXDLCO3                                                                                          | 2.62E-11                                 | Rickard and Pascoe (2009)                         |
| G44434  | TrGAroC  | CO2C4DIAL + OH → CO + CO + CO + CO + HO <sub>2</sub>                                                               | 2.45E-11                                 | Rickard and Pascoe (2009)                         |
| G44435a | TrGAroCN | NBZFUO2 + HO <sub>2</sub> → NBZFUOOH                                                                               | KR02H02(4)*(1-rcoch2o2_oh)               | Rickard and Pascoe (2009),<br>Taraborrelli (2016) |
| G44435b | TrGAroCN | NBZFUO2 + HO <sub>2</sub> → .5 CO14O3CHO + .5 NO <sub>2</sub> + .5 NBZFUONE + .5 HO <sub>2</sub> + OH              | KR02H02(4)*rcoch2o2_oh                   | Rickard and Pascoe (2009),<br>Taraborrelli (2016) |
| G44436  | TrGAroCN | NBZFUO2 + NO → .5 CO14O3CHO + .5 NO <sub>2</sub> + .5 NBZFUONE + .5 HO <sub>2</sub> + NO <sub>2</sub>              | KR02N0                                   | Rickard and Pascoe (2009)*                        |
| G44437  | TrGAroCN | NBZFUO2 + NO <sub>3</sub> → .5 CO14O3CHO + .5 NO <sub>2</sub> + .5 NBZFUONE + .5 HO <sub>2</sub> + NO <sub>2</sub> | KR02N03                                  | Rickard and Pascoe (2009)*                        |
| G44438  | TrGAroCN | NBZFUO2 → .5 CO14O3CHO + .5 NO <sub>2</sub> + .5 NBZFUONE + .5 HO <sub>2</sub>                                     | k1_R02s0R02                              | Rickard and Pascoe (2009)*                        |
| G44439  | TrGAroC  | MALDALCO2H + OH → .6 MALANHY + HO <sub>2</sub> + .4 GLYOX + .4 CO + .4 CO <sub>2</sub>                             | 3.70E-11                                 | Rickard and Pascoe (2009)*                        |
| G44440  | TrGAroCN | EPXC4DIAL + NO <sub>3</sub> → EPXDLCO3 + HNO <sub>3</sub>                                                          | 2*KN03AL*4.0                             | Rickard and Pascoe (2009)                         |
| G44441  | TrGAroC  | EPXC4DIAL + OH → EPXDLCO3                                                                                          | 4.32E-11                                 | Rickard and Pascoe (2009)                         |
| G44442a | TrGAroC  | MECOACETO2 + HO <sub>2</sub> → MECOACEOOH                                                                          | KR02H02(4)*(1-rcoch2o2_oh)               | Rickard and Pascoe (2009),<br>Taraborrelli (2016) |
| G44442b | TrGAroC  | MECOACETO2 + HO <sub>2</sub> → CH <sub>3</sub> C(O)OO + HCHO + CO <sub>2</sub> + OH                                | KR02H02(4)*rcoch2o2_oh                   | Rickard and Pascoe (2009),<br>Taraborrelli (2016) |
| G44443  | TrGAroCN | MECOACETO2 + NO → CH <sub>3</sub> C(O)OO + HCHO + CO <sub>2</sub> + NO <sub>2</sub>                                | KR02N0                                   | Rickard and Pascoe (2009)*                        |
| G44444  | TrGAroCN | MECOACETO2 + NO <sub>3</sub> → CH <sub>3</sub> C(O)OO + HCHO + CO <sub>2</sub> + NO <sub>2</sub>                   | KR02N03                                  | Rickard and Pascoe (2009)*                        |
| G44445  | TrGAroC  | MECOACETO2 → CH <sub>3</sub> C(O)OO + HCHO + CO <sub>2</sub>                                                       | k1_R02p0R02                              | Rickard and Pascoe (2009)*                        |
| G44446  | TrGAroCN | CO14O3CHO + NO <sub>3</sub> → CO + HCOCH2O2 + CO <sub>2</sub> + HNO <sub>3</sub>                                   | KN03AL*8.0                               | Rickard and Pascoe (2009)                         |
| G44447  | TrGAroC  | CO14O3CHO + OH → CO + HCOCH2O2 + CO <sub>2</sub>                                                                   | 3.44E-11                                 | Rickard and Pascoe (2009)                         |
| G44448  | TrGAroCN | NBZFUONE + OH → BZFUCO + NO <sub>2</sub>                                                                           | 1.16E-12                                 | Rickard and Pascoe (2009)                         |
| G44449a | TrGAroC  | BZFUO2 + HO <sub>2</sub> → BZFUOOH                                                                                 | KR02H02(4)*(1-rcoch2o2_oh-rchohch2o2_oh) | Rickard and Pascoe (2009),<br>Taraborrelli (2016) |
| G44449b | TrGAroC  | BZFUO2 + HO <sub>2</sub> → CO14O3CHO + HO <sub>2</sub> + OH                                                        | KR02H02(4)*(rcoch2o2_oh+rchohch2o2_oh)   | Rickard and Pascoe (2009),<br>Taraborrelli (2016) |

Table 1: Gas phase reactions (... continued)

| #       | labels   | reaction                                                                                                                                                                                                                                                                                                                                                                                        | rate coefficient                                         | reference                                   |
|---------|----------|-------------------------------------------------------------------------------------------------------------------------------------------------------------------------------------------------------------------------------------------------------------------------------------------------------------------------------------------------------------------------------------------------|----------------------------------------------------------|---------------------------------------------|
| G44450  | TrGAroCN | BZFUO2 + NO → CO14O3CHO + HO <sub>2</sub> + NO <sub>2</sub>                                                                                                                                                                                                                                                                                                                                     | KR02N0                                                   | Rickard and Pascoe (2009)*                  |
| G44451  | TrGAroCN | BZFUO2 + NO <sub>3</sub> → CO14O3CHO + HO <sub>2</sub> + NO <sub>2</sub>                                                                                                                                                                                                                                                                                                                        | KR02N03                                                  | Rickard and Pascoe (2009)*                  |
| G44452  | TrGAroC  | BZFUO2 → CO14O3CHO + HO <sub>2</sub>                                                                                                                                                                                                                                                                                                                                                            | k1_R02sOR02                                              | Rickard and Pascoe (2009)*                  |
| G44453  | TrGAroC  | BZFUCO + OH → CO14O3CHO + HO <sub>2</sub>                                                                                                                                                                                                                                                                                                                                                       | 1.78E-11                                                 | Rickard and Pascoe (2009)                   |
| G44456a | TrGAroC  | MALDIALO2 + HO <sub>2</sub> → MALDIALOOH                                                                                                                                                                                                                                                                                                                                                        | KR02H02(4)*(1-rcoch2o2_oh-rchohch2o2_oh)                 | Rickard and Pascoe (2009)                   |
| G44456b | TrGAroC  | MALDIALO2 + HO <sub>2</sub> → GLYOX + GLYOX + HO <sub>2</sub> + OH                                                                                                                                                                                                                                                                                                                              | KR02H02(4)*(rcoch2o2_oh+rchohch2o2_oh)                   | Rickard and Pascoe (2009)                   |
| G44457  | TrGAroCN | MALDIALO2 + NO → GLYOX + GLYOX + HO <sub>2</sub> + NO <sub>2</sub>                                                                                                                                                                                                                                                                                                                              | KR02N0                                                   | Rickard and Pascoe (2009)*                  |
| G44458  | TrGAroCN | MALDIALO2 + NO <sub>3</sub> → GLYOX + GLYOX + HO <sub>2</sub> + NO <sub>2</sub>                                                                                                                                                                                                                                                                                                                 | KR02N03                                                  | Rickard and Pascoe (2009)*                  |
| G44459  | TrGAroC  | MALDIALO2 → GLYOX + GLYOX + HO <sub>2</sub>                                                                                                                                                                                                                                                                                                                                                     | k1_R02sOR02                                              | Rickard and Pascoe (2009)*                  |
| G44460  | TrGAroCN | EPXDLPAN + OH → HCOCOCHO + CO + NO <sub>2</sub>                                                                                                                                                                                                                                                                                                                                                 | 2.29E-11                                                 | Rickard and Pascoe (2009)                   |
| G44461  | TrGAroCN | EPXDLPAN → EPXDLCO3 + NO <sub>2</sub>                                                                                                                                                                                                                                                                                                                                                           | k_PAN_M                                                  | Rickard and Pascoe (2009)*                  |
| G44462  | TrGAroC  | MECOACEOOH + OH → MECOACETO2                                                                                                                                                                                                                                                                                                                                                                    | 3.59E-12                                                 | Rickard and Pascoe (2009)                   |
| G45000  | TrGC     | C <sub>5</sub> H <sub>8</sub> + O <sub>3</sub> → .3508 MACR + .01518 MACO2H + .2440 MVK + .7085 HCHO + .11 CH <sub>2</sub> OO + .1275 C <sub>3</sub> H <sub>6</sub> + .1575 CH <sub>3</sub> C(O) + .0510 CH <sub>3</sub> + .2625 HO <sub>2</sub> + .27 OH + .09482 H <sub>2</sub> O <sub>2</sub> + .255 CO <sub>2</sub> + .522 CO + .07182 HCHO + .03618 HCOCH2O2 + .01782 CO + 0.05408 LCARBON | 1.03E-14*EXP(-1995./temp)                                | Atkinson et al. (2006), Taraborrelli (2016) |
| G45001  | TrGC     | C <sub>5</sub> H <sub>8</sub> + OH → .63 ISOPAB + .30 ISOPCD + .07 LISOPEFO2                                                                                                                                                                                                                                                                                                                    | 2.7E-11*EXP(390./temp)                                   | Atkinson et al. (2006), Taraborrelli (2016) |
| G45002  | TrGCN    | C <sub>5</sub> H <sub>8</sub> + NO <sub>3</sub> → NISOPO2                                                                                                                                                                                                                                                                                                                                       | 3.0E-12*EXP(-450./temp)                                  | Atkinson et al. (2006)                      |
| G45003a | TrGC     | ISOPAB + O <sub>2</sub> → LISOPACO2                                                                                                                                                                                                                                                                                                                                                             | 5.530E-13                                                | Taraborrelli (2016)                         |
| G45003b | TrGC     | ISOPAB + O <sub>2</sub> → ISOPBO2                                                                                                                                                                                                                                                                                                                                                               | 3.E-12                                                   | Taraborrelli (2016)                         |
| G45004a | TrGC     | ISOPCD + O <sub>2</sub> → LDISOPACO2                                                                                                                                                                                                                                                                                                                                                            | 6.780E-13                                                | Taraborrelli (2016)                         |
| G45004b | TrGC     | ISOPCD + O <sub>2</sub> → ISOPDO2                                                                                                                                                                                                                                                                                                                                                               | 3.E-12                                                   | Taraborrelli (2016)                         |
| G45005  | TrGC     | LISOPACO2 → ISOPAB + O <sub>2</sub>                                                                                                                                                                                                                                                                                                                                                             | 3.1E12*exp(-7900./temp)*.6+7.8E13*exp(-8600./temp)*.4    | Taraborrelli (2016)                         |
| G45006  | TrGC     | ISOPBO2 → ISOPAB + O <sub>2</sub>                                                                                                                                                                                                                                                                                                                                                               | 3.7E14*exp(-9570./temp)+4.2E14*exp(-9970./temp)          | Taraborrelli (2016)                         |
| G45007  | TrGC     | LDISOPACO2 → ISOPCD + O <sub>2</sub>                                                                                                                                                                                                                                                                                                                                                            | 5.65E12*exp(-8410./temp)*.42+1.4E14*exp(-9110./temp)*.58 | Taraborrelli (2016)                         |
| G45008  | TrGC     | ISOPDO2 → ISOPCD + O <sub>2</sub>                                                                                                                                                                                                                                                                                                                                                               | 5.0E14*exp(-10120./temp)+8.25E14*exp(-10220./temp)       | Taraborrelli (2016)                         |

Table 1: Gas phase reactions (... continued)

| #       | labels | reaction                                                      | rate coefficient                                            | reference                                                                |
|---------|--------|---------------------------------------------------------------|-------------------------------------------------------------|--------------------------------------------------------------------------|
| G45009a | TrGC   | LISOPACO2 → C10DC2O2C4OOH                                     | K16HSZ14 * 2./3.*(1-fhpal)                                  | Taraborrelli (2016)                                                      |
| G45009b | TrGC   | LISOPACO2 → ZCODC23DBCOOH + HO <sub>2</sub>                   | K16HSZ14 * (2./3.*fhpal + 1./3.)                            | Taraborrelli (2016)                                                      |
| G45010a | TrGC   | LDISOPACO2 → C10OHC3O2C4OD                                    | k16HSZ41 * 2./3.*(1-fhpal)                                  | Taraborrelli (2016)                                                      |
| G45010b | TrGC   | LDISOPACO2 → ZCODC23DBCOOH + HO <sub>2</sub>                  | k16HSZ41 * (2./3.*fhpal + 1./3.)                            | Taraborrelli (2016)                                                      |
| G45011  | TrGC   | LISOPACO2 → .9 LISOPACO + .1 ISOPA0H                          | k1_R02LISOPACO2                                             | Rickard and Pascoe (2009),<br>Taraborrelli (2016)                        |
| G45012  | TrGC   | LISOPACO2 + HO <sub>2</sub> → LISOPACOOH                      | KR02H02(5)                                                  | Rickard and Pascoe (2009)                                                |
| G45013a | TrGCN  | LISOPACO2 + NO → LISOPACO + NO <sub>2</sub>                   | KR02N0*(1.-alpha_AN(6,1,0,0,0,<br>temp, cair))              | Lockwood et al. (2010), Paulot<br>et al. (2009a), Taraborrelli<br>(2016) |
| G45013b | TrGCN  | LISOPACO2 + NO → LISOPACNO3                                   | KR02N0*alpha_AN(6,1,0,0,0,temp,<br>cair)                    | Lockwood et al. (2010), Paulot<br>et al. (2009a), Taraborrelli<br>(2016) |
| G45014  | TrGCN  | LISOPACO2 + NO <sub>3</sub> → LISOPACO + NO <sub>2</sub>      | KR02N03                                                     | Rickard and Pascoe (2009)                                                |
| G45015  | TrGC   | LDISOPACO2 → .9 LISOPACO + .1 ISOPA0H                         | k1_R02LISOPACO2                                             | Rickard and Pascoe (2009),<br>Taraborrelli (2016)                        |
| G45016  | TrGC   | LDISOPACO2 + HO <sub>2</sub> → LISOPACOOH                     | KR02H02(5)                                                  | Rickard and Pascoe (2009)                                                |
| G45017a | TrGCN  | LDISOPACO2 + NO → LISOPACO + NO <sub>2</sub>                  | KR02N0*(1.-alpha_AN(6,1,0,0,0,<br>temp, cair))              | Lockwood et al. (2010), Paulot<br>et al. (2009a), Taraborrelli<br>(2016) |
| G45017b | TrGCN  | LDISOPACO2 + NO → LISOPACNO3                                  | KR02N0*alpha_AN(6,1,0,0,0,temp,<br>cair)                    | Lockwood et al. (2010), Paulot<br>et al. (2009a), Taraborrelli<br>(2016) |
| G45018  | TrGCN  | LDISOPACO2 + NO <sub>3</sub> → LISOPACO + NO <sub>2</sub>     | KR02N03                                                     | Rickard and Pascoe (2009)                                                |
| G45019a | TrGC   | LISOPACOOH + OH → LISOPACO2                                   | 0.6*k_CH300H_OH                                             | Taraborrelli (2016)                                                      |
| G45019b | TrGC   | LISOPACOOH + OH → ZCODC23DBCOOH + HO <sub>2</sub>             | k_s*f_allyl*f_soh                                           | Taraborrelli (2016)                                                      |
| G45019c | TrGC   | LISOPACOOH + OH → LHC4ACCHO + OH                              | (k_s*f_soh*f_allyl+ k_rohro)                                | Taraborrelli (2016)                                                      |
| G45019d | TrGC   | LISOPACOOH + OH → LIEPOX + OH                                 | (k_adt+k_ads)*a_ch2oh*a_ch2ooh                              | Taraborrelli (2016)*                                                     |
| G45020  | TrGC   | ISOPA0H + OH → LHC4ACCHO + HO <sub>2</sub>                    | (k_adt+k_ads)*a_ch2oh*a_ch2oh+k_<br>s*f_soh*f_allyl+k_rohro | Taraborrelli (2016)                                                      |
| G45021  | TrGCN  | LISOPACNO3 + OH → LISOPACNO3O2                                | (k_adt+k_ads)*a_ch2ono2*a_ch2oh                             | Taraborrelli (2016)*                                                     |
| G45022  | TrGC   | ISOPBO2 → .8 MVK + .8 HCHO + .8 HO <sub>2</sub> + .2 ISOPBOH  | k1_R02ISOPBO2                                               | Rickard and Pascoe (2009)                                                |
| G45023a | TrGC   | ISOPBO2 + HO <sub>2</sub> → ISOPBOOH                          | KR02H02(5)*(1.-rchohch2o2_oh)                               | Taraborrelli (2016)                                                      |
| G45023b | TrGC   | ISOPBO2 + HO <sub>2</sub> → MVK + HCHO + HO <sub>2</sub> + OH | KR02H02(5)*rchohch2o2_oh                                    | Taraborrelli (2016)                                                      |



Table 1: Gas phase reactions (... continued)

| #       | labels | reaction                                                                                                                                                                                                                                                                                               | rate coefficient                            | reference                                   |
|---------|--------|--------------------------------------------------------------------------------------------------------------------------------------------------------------------------------------------------------------------------------------------------------------------------------------------------------|---------------------------------------------|---------------------------------------------|
| G45024a | TrGCN  | ISOPBO2 + NO → MVK + HCHO + HO <sub>2</sub> + NO <sub>2</sub>                                                                                                                                                                                                                                          | KR02N0*(1.-alpha_AN(6,3,0,0,0, temp, cair)) | Lockwood et al. (2010), Taraborrelli (2016) |
| G45024b | TrGCN  | ISOPBO2 + NO → ISOPBNO3                                                                                                                                                                                                                                                                                | KR02N0*alpha_AN(6,3,0,0,0, temp, cair)      | Lockwood et al. (2010), Taraborrelli (2016) |
| G45025  | TrGCN  | ISOPBO2 + NO <sub>3</sub> → MVK + .75 HCHO + .75 HO <sub>2</sub> + .25 CH <sub>3</sub> + NO <sub>2</sub>                                                                                                                                                                                               | KR02N03                                     | Rickard and Pascoe (2009)                   |
| G45026a | TrGC   | ISOPBOOH + OH → LIEPOX + OH                                                                                                                                                                                                                                                                            | (k_ads+k_adp)*a_ch2ooh                      | Paulot et al. (2009b), Taraborrelli (2016)  |
| G45026b | TrGC   | ISOPBOOH + OH → ISOPBO2                                                                                                                                                                                                                                                                                | 0.6*k_CH300H_OH                             | Taraborrelli (2016)                         |
| G45026c | TrGC   | ISOPBOOH + OH → MGLYOX + HOCH <sub>2</sub> CHO                                                                                                                                                                                                                                                         | k_rohro+k_sf_alk*f_soh                      | Taraborrelli (2016)                         |
| G45027  | TrGC   | ISOPBOOH + O <sub>3</sub> → .1368 MACROOH + .1368 H <sub>2</sub> O <sub>2</sub> + .2280 HO <sub>2</sub> + .4332 CH <sub>3</sub> COCH <sub>2</sub> OH + .2280 CO <sub>2</sub> + .6384 OH + .2052 CO + .57 HCHO + .43 MACROOH + .06880 HO <sub>2</sub> + .06880 OH + .2709 CO + .1591 CH <sub>2</sub> OO | 1.E-17                                      | Taraborrelli (2016)                         |
| G45028  | TrGC   | ISOPBOH + OH → MVK + .75 HCHO + .75 HO <sub>2</sub> + .25 CH <sub>3</sub>                                                                                                                                                                                                                              | k_sf_alk*f_soh+(k_adp+k_ads)*a_ch2oh        | Taraborrelli (2016)                         |
| G45029  | TrGCN  | ISOPBNO3 + OH → ISOPBDNO3O2                                                                                                                                                                                                                                                                            | (k_adt+k_adp)*f_ch2ono2                     | Taraborrelli (2016)                         |
| G45030  | TrGC   | ISOPDO2 → .8 MACR + .8 HCHO + .8 HO <sub>2</sub> + .1 HCOC5 + .1 ISOPDOH                                                                                                                                                                                                                               | k1_R02ISOPD02                               | Rickard and Pascoe (2009)                   |
| G45031a | TrGC   | ISOPDO2 + HO <sub>2</sub> → ISOPDOOH                                                                                                                                                                                                                                                                   | KR02H02(5)*(1.-rchohch2o2_oh)               | Taraborrelli (2016)                         |
| G45031b | TrGC   | ISOPDO2 + HO <sub>2</sub> → MACR + HCHO + HO <sub>2</sub> + OH                                                                                                                                                                                                                                         | KR02H02(5)*rchohch2o2_oh                    | Taraborrelli (2016)                         |
| G45032a | TrGCN  | ISOPDO2 + NO → MACR + HCHO + HO <sub>2</sub> + NO <sub>2</sub>                                                                                                                                                                                                                                         | KR02N0*(1.-alpha_AN(6,2,0,0,0, temp, cair)) | Lockwood et al. (2010), Taraborrelli (2016) |
| G45032b | TrGCN  | ISOPDO2 + NO → ISOPDNO3                                                                                                                                                                                                                                                                                | KR02N0*alpha_AN(6,2,0,0,0, temp, cair)      | Lockwood et al. (2010), Taraborrelli (2016) |
| G45033  | TrGCN  | ISOPDO2 + NO <sub>3</sub> → MACR + HCHO + HO <sub>2</sub> + NO <sub>2</sub>                                                                                                                                                                                                                            | KR02N03                                     | Rickard and Pascoe (2009)                   |
| G45034a | TrGC   | ISOPDOOH + OH → LIEPOX + OH                                                                                                                                                                                                                                                                            | (k_adt+k_adp)*a_ch2ooh                      | Paulot et al. (2009b), Taraborrelli (2016)  |
| G45034b | TrGC   | ISOPDOOH + OH → ISOPDO2                                                                                                                                                                                                                                                                                | 0.6*k_CH300H_OH                             | Taraborrelli (2016)                         |
| G45034c | TrGC   | ISOPDOOH + OH → HCOC5 + OH                                                                                                                                                                                                                                                                             | k_t*f_tooh*f_allyl*f_pch2oh                 | Taraborrelli (2016)                         |
| G45034d | TrGC   | ISOPDOOH + OH → CH <sub>3</sub> COCH <sub>2</sub> OH + GLYOX + OH                                                                                                                                                                                                                                      | k_sf_pch2oh*f_soh                           | Taraborrelli (2016)                         |
| G45035  | TrGC   | ISOPDOOH + O <sub>3</sub> → 1.393 OH + BIACETOH + .67 HCHO + .05280 HO <sub>2</sub> + .2079 CO + .1221 CH <sub>2</sub> OO                                                                                                                                                                              | 1.E-17                                      | Taraborrelli (2016)                         |

Table 1: Gas phase reactions (... continued)

| #       | labels | reaction                                                                                                                                                                                                                                                                                                                                         | rate coefficient                                                        | reference                  |
|---------|--------|--------------------------------------------------------------------------------------------------------------------------------------------------------------------------------------------------------------------------------------------------------------------------------------------------------------------------------------------------|-------------------------------------------------------------------------|----------------------------|
| G45036  | TrGC   | ISOPDOH + OH → HCOC5 + HO <sub>2</sub>                                                                                                                                                                                                                                                                                                           | 2.*k_rohro+(k_t*f_toh*f_allyl+k_s*f_soh)*f_pch2oh+(k_adt+k_adp)*a_ch2oh | Taraborrelli (2016)        |
| G45037  | TrGCN  | ISOPDNO3 + OH → ISOPBDNO3O2                                                                                                                                                                                                                                                                                                                      | (k_adp+k_ads)*a_ch2ono2                                                 | Taraborrelli (2016)*       |
| G45038  | TrGCN  | NISOP02 → .8 NC4CHO + .6 HO <sub>2</sub> + .2 LISOPACNO3                                                                                                                                                                                                                                                                                         | k1_R02LISOPAC02                                                         | Rickard and Pascoe (2009)  |
| G45039  | TrGCN  | NISOP02 + HO <sub>2</sub> → NISOPOOH                                                                                                                                                                                                                                                                                                             | KR02H02(5)                                                              | Rickard and Pascoe (2009)  |
| G45040  | TrGCN  | NISOP02 + NO → NC4CHO + HO <sub>2</sub> + NO <sub>2</sub>                                                                                                                                                                                                                                                                                        | KR02NO                                                                  | Rickard and Pascoe (2009)* |
| G45041  | TrGCN  | NISOP02 + NO <sub>3</sub> → NC4CHO + HO <sub>2</sub> + NO <sub>2</sub>                                                                                                                                                                                                                                                                           | KR02NO3                                                                 | Rickard and Pascoe (2009)  |
| G45042  | TrGCN  | NISOPOOH + OH → NC4CHO + OH                                                                                                                                                                                                                                                                                                                      | 1.03E-10                                                                | Rickard and Pascoe (2009)  |
| G45043  | TrGCN  | NC4CHO + OH → LNISO3                                                                                                                                                                                                                                                                                                                             | (k_adt+k_ads)*a_cho*a_ch2ono2                                           | Taraborrelli (2016)*       |
| G45044  | TrGCN  | NC4CHO + O <sub>3</sub> → .27 NOA + .027 HCOCO <sub>2</sub> H + .0162 GLYOX + .0162 H <sub>2</sub> O <sub>2</sub> + .1458 HCOCO + .0405 HCOOH + .0405 CO + .8758 OH + .365 MGLYOX + .73 NO <sub>2</sub> + 0.7705 HCHO + .4055 CO <sub>2</sub> + .73 GLYOX                                                                                        | 2.40E-17                                                                | Taraborrelli (2016)        |
| G45045  | TrGCN  | NC4CHO + NO <sub>3</sub> → LNISO3 + HNO <sub>3</sub>                                                                                                                                                                                                                                                                                             | KN03AL*4.25                                                             | Rickard and Pascoe (2009)  |
| G45046  | TrGCN  | LNISO3 + HO <sub>2</sub> → LNISOOH                                                                                                                                                                                                                                                                                                               | .5*KR02H02(5) + .5*KAPH02                                               | Rickard and Pascoe (2009)  |
| G45047  | TrGCN  | LNISO3 + NO → NOA + .5 HOCHCHO + .5 CO + .5 HO <sub>2</sub> + NO <sub>2</sub> + .5 CO <sub>2</sub>                                                                                                                                                                                                                                               | .5*KAPNO +.5*KR02NO                                                     | Rickard and Pascoe (2009)* |
| G45048  | TrGCN  | LNISO3 + NO <sub>3</sub> → NOA + .5 HOCHCHO + .5 CO + .5 HO <sub>2</sub> + NO <sub>2</sub> + .5 CO <sub>2</sub>                                                                                                                                                                                                                                  | 1.3*KR02NO3                                                             | Rickard and Pascoe (2009)  |
| G45049  | TrGCN  | LNISOOH + OH → LNISO3                                                                                                                                                                                                                                                                                                                            | 2.65E-11                                                                | Rickard and Pascoe (2009)  |
| G45050a | TrGC   | LHC4ACCHO + OH → LC578O2                                                                                                                                                                                                                                                                                                                         | (k_adttertprim+k_ads)*a_cho*a_ch2oh                                     | Taraborrelli (2016)        |
| G45050b | TrGC   | LHC4ACCHO + OH → LHC4ACCO3                                                                                                                                                                                                                                                                                                                       | k_t*f_o                                                                 | Taraborrelli (2016)        |
| G45050c | TrGC   | LHC4ACCHO + OH → ZCODC23DBCOD + HO <sub>2</sub>                                                                                                                                                                                                                                                                                                  | k_s*f_soh*f_allyl                                                       | Taraborrelli (2016)        |
| G45051  | TrGC   | LHC4ACCHO + O <sub>3</sub> → .2225 CH <sub>3</sub> C(O) + .89 CO + .0171875 HOCH <sub>2</sub> CO <sub>2</sub> H + .075625 H <sub>2</sub> O <sub>2</sub> + .0171875 HCOCO <sub>2</sub> H + .2775 CH <sub>3</sub> COCH <sub>2</sub> OH + .6675 HO <sub>2</sub> + .2603125 GLYOX + .2225 HCHO + .89 OH + .2603125 HOCH <sub>2</sub> CHO + .5 MGLYOX | 2.40E-17                                                                | Rickard and Pascoe (2009)  |
| G45052  | TrGCN  | LHC4ACCHO + NO <sub>3</sub> → LHC4ACCO3 + HNO <sub>3</sub>                                                                                                                                                                                                                                                                                       | KN03AL*4.25                                                             | Rickard and Pascoe (2009)  |
| G45053  | TrGC   | LC578O2 → .25 CH <sub>3</sub> COCH <sub>2</sub> OH + .75 MGLYOX + .25 HOCHCHO + .75 HOCH <sub>2</sub> CHO + .75 HO <sub>2</sub>                                                                                                                                                                                                                  | k1_R02t0R02                                                             | Rickard and Pascoe (2009)  |
| G45054a | TrGC   | LC578O2 + HO <sub>2</sub> → MGLYOX + HOCH <sub>2</sub> CHO + OH                                                                                                                                                                                                                                                                                  | KR02H02(5)*rcoch2o2_oh                                                  | Rickard and Pascoe (2009)  |
| G45054b | TrGC   | LC578O2 + HO <sub>2</sub> → LC578OOH                                                                                                                                                                                                                                                                                                             | KR02H02(5)*rcoch2o2_ooH                                                 | Rickard and Pascoe (2009)  |

Table 1: Gas phase reactions (... continued)

| #       | labels | reaction                                                                                                                                                                                | rate coefficient                                                                                   | reference                  |
|---------|--------|-----------------------------------------------------------------------------------------------------------------------------------------------------------------------------------------|----------------------------------------------------------------------------------------------------|----------------------------|
| G45055  | TrGCN  | $\text{LC578O2} + \text{NO} \rightarrow .25 \text{CH}_3\text{COCH}_2\text{OH} + .75 \text{MGLYOX} + .25 \text{HOCHCHO} + .75 \text{HOCH}_2\text{CHO} + .75 \text{HO}_2 + \text{NO}_2$   | KR02N0                                                                                             | Rickard and Pascoe (2009)* |
| G45056  | TrGCN  | $\text{LC578O2} + \text{NO}_3 \rightarrow .25 \text{CH}_3\text{COCH}_2\text{OH} + .75 \text{MGLYOX} + .25 \text{HOCHCHO} + .75 \text{HOCH}_2\text{CHO} + .75 \text{HO}_2 + \text{NO}_2$ | KR02N03                                                                                            | Rickard and Pascoe (2009)  |
| G45057  | TrGC   | $\text{LC578O2} \rightarrow .25 \text{CH}_3\text{COCH}_2\text{OH} + .75 \text{MGLYOX} + .25 \text{HOCH}_2\text{CHO} + .75 \text{HOCH}_2\text{CHO} + \text{HO}_2 + \text{OH}$            | KHSB                                                                                               | Taraborrelli (2016)        |
| G45058a | TrGC   | $\text{LC578OOH} + \text{OH} \rightarrow \text{LC578O2}$                                                                                                                                | $0.6 * k_{\text{CH300H\_OH}}$                                                                      | Taraborrelli (2016)        |
| G45058b | TrGC   | $\text{LC578OOH} + \text{OH} \rightarrow \text{C10DC20OHC4OD} + \text{HO}_2$                                                                                                            | $k_{\text{t*ff\_o*ff\_tch2oh*ff\_alk+k\_t*ff\_toh*ff\_pch2oh*ff\_pch2oh+k\_s*ff\_soh*ff\_pch2oh}}$ | Taraborrelli (2016)        |
| G45059a | TrGC   | $\text{LHC4ACCO3} \rightarrow \text{OH} + .5 \text{MACRO2} + .5 \text{LHMVKABO2} + \text{CO}_2$                                                                                         | $k1_{\text{R02RC03}} * 0.9$                                                                        | Taraborrelli (2016)        |
| G45059b | TrGC   | $\text{LHC4ACCO3} \rightarrow \text{LHC4ACCO2H}$                                                                                                                                        | $k1_{\text{R02RC03}} * 0.1$                                                                        | Taraborrelli (2016)        |
| G45060a | TrGC   | $\text{LHC4ACCO3} + \text{HO}_2 \rightarrow 2 \text{OH} + .5 \text{MACRO2} + .5 \text{LHMVKABO2} + \text{CO}_2$                                                                         | $\text{KAPH02*rc03\_oh}$                                                                           | Taraborrelli (2016)        |
| G45060b | TrGC   | $\text{LHC4ACCO3} + \text{HO}_2 \rightarrow \text{LHC4ACCO3H}$                                                                                                                          | $\text{KAPH02*rc03\_ooh}$                                                                          | Taraborrelli (2016)        |
| G45060c | TrGC   | $\text{LHC4ACCO3} + \text{HO}_2 \rightarrow \text{LHC4ACCO2H} + \text{O}_3$                                                                                                             | $\text{KAPH02*rc03\_o3}$                                                                           | Taraborrelli (2016)        |
| G45061  | TrGCN  | $\text{LHC4ACCO3} + \text{NO} \rightarrow .5 \text{MACRO2} + .5 \text{LHMVKABO2} + \text{NO}_2 + \text{CO}_2$                                                                           | KAPNO                                                                                              | Taraborrelli (2016)        |
| G45062  | TrGCN  | $\text{LHC4ACCO3} + \text{NO}_2 \rightarrow \text{LC5PAN1719}$                                                                                                                          | $k_{\text{CH3C03\_N02}}$                                                                           | Rickard and Pascoe (2009)  |
| G45063  | TrGCN  | $\text{LHC4ACCO3} + \text{NO}_3 \rightarrow .5 \text{MACRO2} + .5 \text{LHMVKABO2} + \text{NO}_2 + \text{CO}_2$                                                                         | $1.6 * \text{KR02N03}$                                                                             | Taraborrelli (2016)        |
| G45064a | TrGC   | $\text{LHC4ACCO2H} + \text{OH} \rightarrow \text{OH} + .5 \text{MACRO2} + .5 \text{LHMVKABO2} + \text{CO}_2$                                                                            | $2.52\text{E-}11$                                                                                  | Taraborrelli (2016)        |
| G45064b | TrGC   | $\text{LHC4ACCO3H} + \text{OH} \rightarrow \text{LHC4ACCO3}$                                                                                                                            | $2.88\text{E-}11$                                                                                  | Rickard and Pascoe (2009)  |
| G45065  | TrGCN  | $\text{LC5PAN1719} \rightarrow \text{LHC4ACCO3} + \text{NO}_2$                                                                                                                          | $k_{\text{PAN\_M}}$                                                                                | Rickard and Pascoe (2009)  |
| G45066  | TrGCN  | $\text{LC5PAN1719} + \text{OH} \rightarrow .5 \text{MACROH} + .5 \text{HO12CO3C4} + \text{CO} + \text{NO}_2$                                                                            | $2.52\text{E-}11$                                                                                  | Rickard and Pascoe (2009)  |
| G45067  | TrGC   | $\text{HCOC5} + \text{OH} \rightarrow \text{C59O2}$                                                                                                                                     | $3.81\text{E-}11$                                                                                  | Rickard and Pascoe (2009)  |
| G45068  | TrGC   | $\text{HCOC5} + \text{O}_3 \rightarrow \text{BIACETOH} + .335 \text{H}_2\text{O}_2 + .67 \text{HCHO} + .2079 \text{CO} + .1221 \text{CH}_2\text{OO} + .05280 \text{OH}$                 | $7.51\text{E-}16 * \text{EXP}(-1521./\text{temp})$                                                 | Taraborrelli (2016)        |
| G45069  | TrGC   | $\text{C59O2} \rightarrow \text{CH}_3\text{COCH}_2\text{OH} + \text{HOCH}_2\text{CO}$                                                                                                   | $k1_{\text{R02t0R02}}$                                                                             | Taraborrelli (2016)        |
| G45070a | TrGC   | $\text{C59O2} + \text{HO}_2 \rightarrow \text{OH} + \text{CH}_3\text{COCH}_2\text{OH} + \text{HOCH}_2\text{CO}$                                                                         | $\text{KR02H02(5)*rcoch2o2\_oh}$                                                                   | Taraborrelli (2016)        |
| G45070b | TrGC   | $\text{C59O2} + \text{HO}_2 \rightarrow \text{C59OOH}$                                                                                                                                  | $\text{KR02H02(5)*rcoch2o2\_ooh}$                                                                  | Taraborrelli (2016)        |
| G45071  | TrGCN  | $\text{C59O2} + \text{NO} \rightarrow \text{CH}_3\text{COCH}_2\text{OH} + \text{HOCH}_2\text{CO} + \text{NO}_2$                                                                         | KR02N0                                                                                             | Taraborrelli (2016)*       |

Table 1: Gas phase reactions (... continued)

| #       | labels | reaction                                                                                                                                                                                                                                                                                                                                                                                                                                                                                                                       | rate coefficient                                         | reference                                                        |
|---------|--------|--------------------------------------------------------------------------------------------------------------------------------------------------------------------------------------------------------------------------------------------------------------------------------------------------------------------------------------------------------------------------------------------------------------------------------------------------------------------------------------------------------------------------------|----------------------------------------------------------|------------------------------------------------------------------|
| G45072  | TrGCN  | $C59O2 + NO_3 \rightarrow CH_3COCH_2OH + HOCH_2CO + NO_2$                                                                                                                                                                                                                                                                                                                                                                                                                                                                      | KR02N03                                                  | Taraborrelli (2016)                                              |
| G45073  | TrGC   | $C59OOH + OH \rightarrow C59O2$                                                                                                                                                                                                                                                                                                                                                                                                                                                                                                | 9.7E-12                                                  | Rickard and Pascoe (2009)                                        |
| G45074  | TrGC   | $LIEPOX + OH \rightarrow DB1O2 + H_2O$                                                                                                                                                                                                                                                                                                                                                                                                                                                                                         | $5.78E-11 * EXP(-400./temp) * (1.52/3.+0.98*2./3.)/1.51$ | Paulot et al. (2009b), Bates et al. (2014), Taraborrelli (2016)* |
| G45075  | TrGC   | $ISOPBO2 \rightarrow MVK + HCHO + OH$                                                                                                                                                                                                                                                                                                                                                                                                                                                                                          | KHSB                                                     | Taraborrelli (2016)                                              |
| G45076  | TrGC   | $ISOPDO2 \rightarrow MACR + HCHO + OH$                                                                                                                                                                                                                                                                                                                                                                                                                                                                                         | KHSD                                                     | Taraborrelli (2016)                                              |
| G45077a | TrGC   | $ZCODC23DBC00H + OH \rightarrow .6 C1ODC2O2C4OOH + .4 C1OOHC2O2C4OD$                                                                                                                                                                                                                                                                                                                                                                                                                                                           | $k\_adt*a\_cho*a\_ch2ooh$                                | Taraborrelli (2016)                                              |
| G45077b | TrGC   | $ZCODC23DBC00H + OH \rightarrow .6 C1ODC3O2C4OOH + .4 C1OOHC3O2C4OD$                                                                                                                                                                                                                                                                                                                                                                                                                                                           | $k\_ads*a\_cho*a\_ch2ooh$                                | Taraborrelli (2016)                                              |
| G45077c | TrGC   | $ZCODC23DBC00H + OH \rightarrow ZCO3HC23DBCOD$                                                                                                                                                                                                                                                                                                                                                                                                                                                                                 | $k\_t*f\_o*f\_alk+0.6*k\_CH300H\_OH$                     | Taraborrelli (2016)                                              |
| G45077d | TrGC   | $ZCODC23DBC00H + OH \rightarrow ZCODC23DBCOD + OH$                                                                                                                                                                                                                                                                                                                                                                                                                                                                             | $k\_s*f\_sooh*f\_allyl$                                  | Taraborrelli (2016)                                              |
| G45078  | TrGC   | $ZCODC23DBC00H + O_3 \rightarrow .4672 OH + .2336 HCOCOCH_2O_2 + .2336 CO + .2336 CH_3C(O) + .4672 HOOCH_2CHO + .1728 MGLYOX + .1901 OH + .0864 GLYOX + .02765 HOOCH_2CHO + .02765 H_2O_2 + .02592 CH_3OOH + .02592 CO_2 + .01037 HCOCO + .01555 CH_2OO + .01555 CO + .006908 HOOCH_2CO_3 + .2628 OH + .1314 MGLYOX + .1314 OH + .1314 HCOCOCH_2OOH + .2628 GLYOX + .0972 CH_3COCH_2O_2H + .00972 HCOCO_2H + .005832 GLYOX + .005832 H_2O_2 + .05249 OH + .05249 HCOCO + .01458 HCHO + .01458 CO_2 + .01458 HCOOH + .01458 CO$ | 2.4E-17                                                  | Taraborrelli (2016)                                              |
| G45079  | TrGC   | $C1OOHC2O2C4OD \rightarrow .78 CH_3COCH_2O_2H + .78 HOCHCHO + .22 CO_2H_3CHO + .22 HCHO + .22 OH$                                                                                                                                                                                                                                                                                                                                                                                                                              | $k1\_R02t0R02$                                           | Taraborrelli (2016)                                              |
| G45080  | TrGCN  | $C1OOHC2O2C4OD + NO \rightarrow .78 CH_3COCH_2O_2H + .78 HOCHCHO + .22 CO_2H_3CHO + .22 HCHO + .22 OH + NO_2$                                                                                                                                                                                                                                                                                                                                                                                                                  | KR02N0                                                   | Taraborrelli (2016)*                                             |
| G45081a | TrGC   | $C1OOHC2O2C4OD + HO_2 \rightarrow C1OOHC2OOHC4OD$                                                                                                                                                                                                                                                                                                                                                                                                                                                                              | $KR02H02(5)*rcoch2o2\_ooh$                               | Taraborrelli (2016)                                              |
| G45081b | TrGC   | $C1OOHC2O2C4OD + HO_2 \rightarrow .78 CH_3COCH_2O_2H + .78 HOCHCHO + .22 CO_2H_3CHO + .22 HCHO + 1.22 OH$                                                                                                                                                                                                                                                                                                                                                                                                                      | $KR02H02(5)*rcoch2o2\_oh$                                | Taraborrelli (2016)                                              |
| G45082  | TrGC   | $C1OOHC2O2C4OD \rightarrow CH_3COCH_2O_2H + GLYOX + OH$                                                                                                                                                                                                                                                                                                                                                                                                                                                                        | KHSB                                                     | Taraborrelli (2016)                                              |
| G45083  | TrGC   | $C1ODC2O2C4OOH \rightarrow OH + C1ODC2OOHC4OD$                                                                                                                                                                                                                                                                                                                                                                                                                                                                                 | K15HSDHB                                                 | Taraborrelli (2016)                                              |
| G45084a | TrGC   | $C1OOHC2OOHC4OD + OH \rightarrow C1ODC2OOHC4OD + OH$                                                                                                                                                                                                                                                                                                                                                                                                                                                                           | $2.*k\_s*f\_sooh*f\_tch2oh$                              | Taraborrelli (2016)                                              |

Table 1: Gas phase reactions (... continued)

| #       | labels | reaction                                                                                                                                                                                                                                                                                                                                                              | rate coefficient                                                                                                              | reference            |
|---------|--------|-----------------------------------------------------------------------------------------------------------------------------------------------------------------------------------------------------------------------------------------------------------------------------------------------------------------------------------------------------------------------|-------------------------------------------------------------------------------------------------------------------------------|----------------------|
| G45084b | TrGC   | $\text{C10OHC2OOHC4OD} + \text{OH} \rightarrow \text{CH}_3\text{COCH}_2\text{O}_2\text{H} + 2 \text{CO} + 2 \text{HO}_2 + \text{OH}$                                                                                                                                                                                                                                  | $k_{\text{t*}f_{\text{to}h*}f_{\text{p}ch2oh*}f_{\text{p}ch2oh}}$                                                             | Taraborrelli (2016)  |
| G45084c | TrGC   | $\text{C10OHC2OOHC4OD} + \text{OH} \rightarrow \text{C10OHC2O2C4OD}$                                                                                                                                                                                                                                                                                                  | $0.6*k_{\text{CH300H\_OH}}$                                                                                                   | Taraborrelli (2016)  |
| G45085  | TrGC   | $\text{C1ODC2OOHC4OD} + \text{OH} \rightarrow \text{CO}_2\text{H}_3\text{CHO} + \text{CO} + \text{H}_2\text{O} + \text{OH}$                                                                                                                                                                                                                                           | $k_{\text{t*}f_{\text{o}f_{\text{t}ch2oh*}k_{\text{t*}f_{\text{to}h*}f_{\text{to}h*}f_{\text{cho}}}}$                         | Taraborrelli (2016)  |
| G45086  | TrGC   | $\text{C1ODC3O2C4OOH} \rightarrow \text{MGLYOX} + \text{HOOCH}_2\text{CHO} + \text{HO}_2$                                                                                                                                                                                                                                                                             | $k1\_R02s0R02$                                                                                                                | Taraborrelli (2016)  |
| G45087  | TrGCN  | $\text{C1ODC3O2C4OOH} + \text{NO} \rightarrow \text{MGLYOX} + \text{HOOCH}_2\text{CHO} + \text{HO}_2 + \text{NO}_2$                                                                                                                                                                                                                                                   | $\text{KR02N0}$                                                                                                               | Taraborrelli (2016)  |
| G45088  | TrGC   | $\text{C1ODC3O2C4OOH} + \text{HO}_2 \rightarrow .5 \text{CH}_3\text{C(O)} + .5 \text{CO} + .5 \text{MGLYOX} + .5 \text{HO}_2 + \text{HOOCH}_2\text{CO}_3$                                                                                                                                                                                                             | $\text{KR02H02(5)}$                                                                                                           | Taraborrelli (2016)  |
| G45089  | TrGC   | $\text{C1ODC3O2C4OOH} \rightarrow \text{MGLYOX} + \text{OH} + \text{HOOCH}_2\text{CHO}$                                                                                                                                                                                                                                                                               | $\text{KHSD}$                                                                                                                 | Taraborrelli (2016)  |
| G45090  | TrGC   | $\text{C10OHC3O2C4OD} \rightarrow .625 \text{MGLYOX} + 2 \text{CO} + 1.625 \text{HO}_2 + .375 \text{CH}_3\text{C(O)} + .375 \text{CO}_2 + \text{OH}$                                                                                                                                                                                                                  | $\text{K15HSDHB}$                                                                                                             | Taraborrelli (2016)  |
| G45091  | TrGC   | $\text{LHC4ACCO}_3 \rightarrow \text{ZCO}_3\text{HC}_2\text{3DBCOD} + \text{HO}_2$                                                                                                                                                                                                                                                                                    | $\text{K16HS}$                                                                                                                | Taraborrelli (2016)  |
| G45092a | TrGC   | $\text{ZCODC23DBCOD} + \text{OH} \rightarrow \text{C1ODC2O2C4OD}$                                                                                                                                                                                                                                                                                                     | $(k_{\text{adt}+k_{\text{ads}})*a_{\text{cho}}*a_{\text{cho}}}$                                                               | Taraborrelli (2016)* |
| G45092b | TrGC   | $\text{ZCODC23DBCOD} + \text{OH} \rightarrow \text{ZCO}_3\text{C}_2\text{3DBCOD}$                                                                                                                                                                                                                                                                                     | $2*k_{\text{t*}f_{\text{o}f_{\text{alk}}}}$                                                                                   | Taraborrelli (2016)* |
| G45093  | TrGCN  | $\text{ZCODC23DBCOD} + \text{NO}_3 \rightarrow \text{ZCO}_3\text{C}_2\text{3DBCOD} + \text{HNO}_3$                                                                                                                                                                                                                                                                    | $\text{KN03AL*4.25*2.}$                                                                                                       | Taraborrelli (2016)* |
| G45094a | TrGC   | $\text{C1ODC2O2C4OD} + \text{HO}_2 \rightarrow \text{OH} + \text{MGLYOX} + \text{HOCHCHO}$                                                                                                                                                                                                                                                                            | $\text{KR02H02(5)*rcoch2o2\_oh}$                                                                                              | Taraborrelli (2016)  |
| G45094b | TrGC   | $\text{C1ODC2O2C4OD} + \text{HO}_2 \rightarrow \text{C1ODC2OOHC4OD}$                                                                                                                                                                                                                                                                                                  | $\text{KR02H02(5)*rcoch2o2\_ooh}$                                                                                             | Taraborrelli (2016)  |
| G45095  | TrGCN  | $\text{C1ODC2O2C4OD} + \text{NO} \rightarrow \text{NO}_2 + \text{MGLYOX} + \text{HOCHCHO}$                                                                                                                                                                                                                                                                            | $\text{KR02N0}$                                                                                                               | Taraborrelli (2016)* |
| G45096  | TrGC   | $\text{C1ODC2O2C4OD} \rightarrow \text{MGLYOX} + \text{HOCHCHO}$                                                                                                                                                                                                                                                                                                      | $k1\_R02t0R02$                                                                                                                | Taraborrelli (2016)  |
| G45097a | TrGC   | $\text{C1ODC2OOHC4OD} + \text{OH} \rightarrow \text{MGLYOX} + 2 \text{CO}$                                                                                                                                                                                                                                                                                            | $(2.*k_{\text{t*}f_{\text{o}f_{\text{t}ch2oh*}f_{\text{alk}+k_{\text{t*}f_{\text{to}h*}f_{\text{cho}f_{\text{p}ch2oh*}}}}*5}$ | Taraborrelli (2016)  |
| G45097b | TrGC   | $\text{C1ODC2OOHC4OD} + \text{OH} \rightarrow \text{MGLYOX} + 2 \text{CO} + \text{OH}$                                                                                                                                                                                                                                                                                | $(2.*k_{\text{t*}f_{\text{o}f_{\text{t}ch2oh*}f_{\text{alk}+k_{\text{t*}f_{\text{to}h*}f_{\text{cho}f_{\text{p}ch2oh*}}}}*5}$ | Taraborrelli (2016)  |
| G45098  | TrGCN  | $\text{LISOPACNO}_3\text{O}_2 + \text{NO} \rightarrow .21 \text{NOA} + .21 \text{HOCH}_2\text{CHO} + .21 \text{HO}_2 + .49 \text{HO}_1\text{2CO}_3\text{C}_4 + .49 \text{HCHO} + .49 \text{NO}_2 + .045 \text{MVKNO}_3 + .045 \text{HCHO} + .255 \text{CH}_3\text{COCH}_2\text{OH} + .255 \text{NO}_3\text{CH}_2\text{CHO} + .225 \text{H}_2\text{O}_2 + \text{NO}_2$ | $\text{KR02N0}$                                                                                                               | Taraborrelli (2016)* |

Table 1: Gas phase reactions (... continued)

| #       | labels | reaction                                                                                                                                                                                                                                                                                                                                                                               | rate coefficient                          | reference                                     |
|---------|--------|----------------------------------------------------------------------------------------------------------------------------------------------------------------------------------------------------------------------------------------------------------------------------------------------------------------------------------------------------------------------------------------|-------------------------------------------|-----------------------------------------------|
| G45099  | TrGCN  | LISOPACNO3O2 $\rightarrow$ .21 NOA + .21 HOCH <sub>2</sub> CHO + .21 HO <sub>2</sub> + .49 HO12CO3C4 + .49 HCHO + .49 NO <sub>2</sub> + .045 MVKNO3 + .045 HCHO + .255 CH <sub>3</sub> COCH <sub>2</sub> OH + .255 NO <sub>3</sub> CH <sub>2</sub> CHO + .225 H <sub>2</sub> O <sub>2</sub>                                                                                            | k1_R02t0R02+KR02H02(5)*c(ind_H02)         | Taraborrelli (2016)                           |
| G45100  | TrGCN  | ISOPBDNO3O2 + NO $\rightarrow$ .6 CH <sub>3</sub> COCH <sub>2</sub> OH + .6 HOCH <sub>2</sub> CHO + .26 MACRN + .14 MVKNO3 + .4 HCHO + .4 HO <sub>2</sub> + 1.6 NO <sub>2</sub>                                                                                                                                                                                                        | KR02NO                                    | Taraborrelli (2016)*                          |
| G45101  | TrGCN  | ISOPBDNO3O2 $\rightarrow$ .6 CH <sub>3</sub> COCH <sub>2</sub> OH + .6 HOCH <sub>2</sub> CHO + .26 MACRN + .14 MVKNO3 + .4 HCHO + .4 HO <sub>2</sub> + .6 NO <sub>2</sub>                                                                                                                                                                                                              | k1_R02s0R02+KR02H02(5)*c(ind_H02)         | Taraborrelli (2016)                           |
| G45102  | TrGCN  | LISOPACNO3 + O <sub>3</sub> $\rightarrow$ .8704 OH + .365 HO <sub>2</sub> + .73 MGLYOX + .4325 NO <sub>3</sub> CH <sub>2</sub> CHO + .135 CH <sub>3</sub> COCH <sub>2</sub> OH + .0675 GLYOX + .4325 NO <sub>2</sub> + .0891 H <sub>2</sub> O <sub>2</sub> + .135 NOA + .0675 HOCHCHO + .3866 HOCH <sub>2</sub> CHO + .0405 CH <sub>3</sub> OH + .0405 CO + .0054 HOCH <sub>2</sub> CO | 2.8E-17                                   | Feierabend et al. (2008), Taraborrelli (2016) |
| G45103  | TrGC   | DB1O2 $\rightarrow$ DB1O2                                                                                                                                                                                                                                                                                                                                                              | k1_R02s0R02                               | Taraborrelli (2016)                           |
| G45104a | TrGC   | DB1O2 + HO <sub>2</sub> $\rightarrow$ DB1OOH                                                                                                                                                                                                                                                                                                                                           | KR02H02(5)*(1.-rchohch2o2_oh)             | Taraborrelli (2016)*                          |
| G45104b | TrGC   | DB1O2 + HO <sub>2</sub> $\rightarrow$ DB1O2 + OH                                                                                                                                                                                                                                                                                                                                       | KR02H02(5)*rchohch2o2_oh                  | Taraborrelli (2016)                           |
| G45105a | TrGCN  | DB1O2 + NO $\rightarrow$ DB1O2 + NO <sub>2</sub>                                                                                                                                                                                                                                                                                                                                       | KR02NO*(1.-alpha_AN(7,2,0,0,0,temp,cair)) | Taraborrelli (2016)                           |
| G45105b | TrGCN  | DB1O2 + NO $\rightarrow$ DB1NO3                                                                                                                                                                                                                                                                                                                                                        | KR02NO*alpha_AN(7,2,0,0,0,temp,cair)      | Taraborrelli (2016)                           |
| G45106  | TrGCN  | DB1O2 + NO <sub>3</sub> $\rightarrow$ DB1O2 + NO <sub>2</sub>                                                                                                                                                                                                                                                                                                                          | KR02NO3                                   | Taraborrelli (2016)                           |
| G45107  | TrGC   | DB1O2 $\rightarrow$ DB1O2 + OH                                                                                                                                                                                                                                                                                                                                                         | 1.E4                                      | Peeters and Nguyen (2012)*                    |
| G45108a | TrGC   | DB1O2 $\rightarrow$ DB1O2                                                                                                                                                                                                                                                                                                                                                              | KDEC*0.72                                 | see note*                                     |
| G45108b | TrGC   | DB1O2 $\rightarrow$ .5 HVMK + .5 HMAc + HCHO + HO <sub>2</sub>                                                                                                                                                                                                                                                                                                                         | KDEC*0.28                                 | see note*                                     |
| G45109  | TrGC   | DB1O2 $\rightarrow$ .48 CH <sub>3</sub> COCH <sub>2</sub> OH + .52 HOCH <sub>2</sub> CHO + .52 MGLYOX + .48 GLYOX + HO <sub>2</sub>                                                                                                                                                                                                                                                    | k1_R02s0R02                               | Taraborrelli (2016)                           |
| G45110a | TrGC   | DB1O2 + HO <sub>2</sub> $\rightarrow$ DB2OOH                                                                                                                                                                                                                                                                                                                                           | KR02H02(5)*(1.-rchohch2o2_oh)             | Taraborrelli (2016)                           |
| G45110b | TrGC   | DB1O2 + HO <sub>2</sub> $\rightarrow$ .48 CH <sub>3</sub> COCH <sub>2</sub> OH + .52 HOCH <sub>2</sub> CHO + .52 MGLYOX + .48 GLYOX + HO <sub>2</sub> + OH                                                                                                                                                                                                                             | KR02H02(5)*rchohch2o2_oh                  | Taraborrelli (2016)                           |
| G45111  | TrGCN  | DB1O2 + NO $\rightarrow$ .48 CH <sub>3</sub> COCH <sub>2</sub> OH + .52 HOCH <sub>2</sub> CHO + .52 MGLYOX + .48 GLYOX + HO <sub>2</sub> + NO <sub>2</sub>                                                                                                                                                                                                                             | KR02NO                                    | see note*                                     |
| G45112  | TrGCN  | DB1O2 + NO <sub>3</sub> $\rightarrow$ .48 CH <sub>3</sub> COCH <sub>2</sub> OH + .52 HOCH <sub>2</sub> CHO + .52 MGLYOX + .48 GLYOX + HO <sub>2</sub> + NO <sub>2</sub>                                                                                                                                                                                                                | KR02NO3                                   | Taraborrelli (2016)                           |

Table 1: Gas phase reactions (... continued)

| #       | labels | reaction                                                                                                                                                                                                                                                                                                                                                                                                                                                                                                                                                          | rate coefficient                                 | reference                               |
|---------|--------|-------------------------------------------------------------------------------------------------------------------------------------------------------------------------------------------------------------------------------------------------------------------------------------------------------------------------------------------------------------------------------------------------------------------------------------------------------------------------------------------------------------------------------------------------------------------|--------------------------------------------------|-----------------------------------------|
| G45113  | TrGC   | DB1O2 → .48 MACROOH + .52 LHMVKABOOH + CO + OH                                                                                                                                                                                                                                                                                                                                                                                                                                                                                                                    | K14HSAL                                          | Taraborrelli (2016)                     |
| G45114a | TrGC   | DB1OOH + OH → DB1O2                                                                                                                                                                                                                                                                                                                                                                                                                                                                                                                                               | .6*k_CH300H_OH                                   | Taraborrelli (2016)                     |
| G45114b | TrGC   | DB1OOH + OH → HCOOH + HO <sub>2</sub> + CH <sub>3</sub> COCHO <sub>2</sub> CHO                                                                                                                                                                                                                                                                                                                                                                                                                                                                                    | k_adt                                            | Taraborrelli (2016)*                    |
| G45115  | TrGC   | DB1OOH + HCOOH → C1ODC2OOHC4OD + HCOOH                                                                                                                                                                                                                                                                                                                                                                                                                                                                                                                            | 4.67E-26*temp**3.286*EXP(4509./<br>(1.987*temp)) | Taraborrelli (2016), daSilva<br>(2010)* |
| G45116  | TrGCN  | DB1NO3 + OH → HCOOH + NO <sub>2</sub> + CH <sub>3</sub> COCHO <sub>2</sub> CHO                                                                                                                                                                                                                                                                                                                                                                                                                                                                                    | k_adt                                            | Taraborrelli (2016)*                    |
| G45117  | TrGC   | DB2OOH + OH → DB1O2                                                                                                                                                                                                                                                                                                                                                                                                                                                                                                                                               | .6*k_CH300H_OH                                   | Taraborrelli (2016)*                    |
| G45118  | TrGC   | LISOPACOOH + O <sub>3</sub> → 1.3272 OH + .36986 HO <sub>2</sub> + .0432 H <sub>2</sub> O <sub>2</sub> + .08422 CO + .2025 CH <sub>3</sub> OOH + .01215 CH <sub>2</sub> OO + .3704 HCHO + .00405 CH <sub>3</sub> OH + .0405 CO <sub>2</sub> + .1825 HOCH <sub>2</sub> COCH <sub>2</sub> O <sub>2</sub> + .365 MGLYOX + .3866 HOOCH <sub>2</sub> CHO + .135 CH <sub>3</sub> COCH <sub>2</sub> OH + .0675 GLYOX + .00324 HCOCO + .3866 HOCH <sub>2</sub> CHO + .135 CH <sub>3</sub> COCH <sub>2</sub> O <sub>2</sub> H + .0675 HOCHCHO + .0054 HOCH <sub>2</sub> CO | 4.829E-16                                        | Taraborrelli (2016)                     |
| G45119a | TrGC   | ZCO3HC23DBCOD + OH → .62 CO <sub>2</sub> H <sub>3</sub> CHO + .62 OH + .62 CO <sub>2</sub> + .38 MGLYOX + .38 HCOCO <sub>3</sub> H + .38 HO <sub>2</sub>                                                                                                                                                                                                                                                                                                                                                                                                          | k_adt*a_cho*a_co2h                               | Taraborrelli (2016)                     |
| G45119b | TrGC   | ZCO3HC23DBCOD + OH → .62 CH <sub>3</sub> COCO <sub>3</sub> H + 1.24 CO + 1.24 HO <sub>2</sub> + .38 MGLYOX + .38 HO <sub>2</sub> + .38 CO + .38 HO <sub>2</sub> + .38 OH + .38 CO <sub>2</sub>                                                                                                                                                                                                                                                                                                                                                                    | k_ads*a_cho*a_co2h                               | Taraborrelli (2016)                     |
| G45120  | TrGC   | LISOPEFO2 → LISOPEFO                                                                                                                                                                                                                                                                                                                                                                                                                                                                                                                                              | k1_R02p0R02                                      | Taraborrelli (2016)                     |
| G45121a | TrGCN  | LISOPEFO2 + NO → LISOPEFO + NO <sub>2</sub>                                                                                                                                                                                                                                                                                                                                                                                                                                                                                                                       | KR02N0*(1.-alpha_AN(6,1,0,0,0,<br>temp, cair))   | Taraborrelli (2016)                     |
| G45121b | TrGCN  | LISOPEFO2 + NO → ISOPDNO3                                                                                                                                                                                                                                                                                                                                                                                                                                                                                                                                         | KR02N0*alpha_AN(6,1,0,0,0,temp,<br>cair)         | Taraborrelli (2016)*                    |
| G45122a | TrGC   | LISOPEFO2 + HO <sub>2</sub> → .7143 ISOPDOOH + .2857 ISOPBOOH                                                                                                                                                                                                                                                                                                                                                                                                                                                                                                     | KR02H02(5)*(1.-rchohch2o2_oh)                    | Taraborrelli (2016)                     |
| G45122b | TrGC   | LISOPEFO2 + HO <sub>2</sub> → LISOPEFO + OH                                                                                                                                                                                                                                                                                                                                                                                                                                                                                                                       | KR02H02(5)*rchohch2o2_oh                         | Taraborrelli (2016)                     |
| G45123  | TrGCN  | LISOPEFO2 + NO <sub>3</sub> → LISOPEFO + NO <sub>2</sub>                                                                                                                                                                                                                                                                                                                                                                                                                                                                                                          | KR02N03                                          | Taraborrelli (2016)                     |
| G45124  | TrGC   | LISOPEFO2 → .7143 MACR + .2857 MVK + HCHO + OH                                                                                                                                                                                                                                                                                                                                                                                                                                                                                                                    | .7143*KHSD+.2857*KHSB                            | Taraborrelli (2016)                     |
| G45125  | TrGC   | LISOPEFO → .7143 MACR + .2857 MVK + HCHO + HO <sub>2</sub>                                                                                                                                                                                                                                                                                                                                                                                                                                                                                                        | KDEC                                             | Taraborrelli (2016)                     |

Table 1: Gas phase reactions (... continued)

| #       | labels   | reaction                                                                                                   | rate coefficient         | reference                                                                   |
|---------|----------|------------------------------------------------------------------------------------------------------------|--------------------------|-----------------------------------------------------------------------------|
| G45126a | TrGC     | LISOPACO → 3METHYLFURAN + HO <sub>2</sub>                                                                  | KDEC*0.37                | Taraborrelli (2016), Paulot et al. (2009a), Francisco-Marquez et al. (2003) |
| G45126b | TrGC     | LISOPACO → .65 LHC4ACCHO + .65 HO <sub>2</sub> + .35 DB1O2                                                 | KDEC*(1.-0.37)           | Taraborrelli (2016), Paulot et al. (2009a), Francisco-Marquez et al. (2003) |
| G45127a | TrGC     | LISOPACO → 3METHYLFURAN + HO <sub>2</sub>                                                                  | KDEC*0.37                | Taraborrelli (2016), Paulot et al. (2009a), Francisco-Marquez et al. (2003) |
| G45127b | TrGC     | LISOPACO → .65 LHC4ACCHO + .65 HO <sub>2</sub> + .35 DB1O2                                                 | KDEC*(1.-0.37)           | Taraborrelli (2016), Paulot et al. (2009a), Francisco-Marquez et al. (2003) |
| G45128  | TrGC     | 3METHYLFURAN + OH → L3METHYLFURANO2                                                                        | 3.2E-11*EXP(310./temp)   | Taraborrelli (2016)*                                                        |
| G45129  | TrGCN    | 3METHYLFURAN + NO <sub>3</sub> → L3METHYLFURANO2 + NO <sub>2</sub>                                         | 1.9E-11                  | Taraborrelli (2016), Atkinson et al. (2006)*                                |
| G45130  | TrGC     | L3METHYLFURANO2 → ZCODC23DBCOD + HO <sub>2</sub>                                                           | k1_R02s0R02              | Taraborrelli (2016)                                                         |
| G45131  | TrGCN    | L3METHYLFURANO2 + NO → ZCODC23DBCOD + HO <sub>2</sub> + NO <sub>2</sub>                                    | KR02N0                   | Taraborrelli (2016)*                                                        |
| G45132  | TrGC     | L3METHYLFURANO2 + HO <sub>2</sub> → ZCODC23DBCOD + HO <sub>2</sub>                                         | KR02H02(5)               | Taraborrelli (2016)*                                                        |
| G45133  | TrGC     | ZCO3C23DBCOD → .62 EZCH3CO2CHCHO + .38 EZCHOCCH3CHO2 + CO <sub>2</sub>                                     | k1_R02RC03               | Taraborrelli (2016)                                                         |
| G45134a | TrGC     | ZCO3C23DBCOD + HO <sub>2</sub> → .62 EZCH3CO2CHCHO + .38 EZCHOCCH3CHO2 + CO <sub>2</sub> + OH              | KAPH02*rco3_oh           | Taraborrelli (2016)                                                         |
| G45134b | TrGC     | ZCO3C23DBCOD + HO <sub>2</sub> → ZCO3HC23DBCOD                                                             | KAPH02*(rco3_oh+rco3_o3) | Taraborrelli (2016)*                                                        |
| G45135  | TrGCN    | ZCO3C23DBCOD + NO → .62 EZCH3CO2CHCHO + .38 EZCHOCCH3CHO2 + CO <sub>2</sub> + NO <sub>2</sub>              | KAPNO                    | Taraborrelli (2016)                                                         |
| G45136  | TrGCN    | ZCO3C23DBCOD + NO <sub>2</sub> → ZCPANC23DBCOD                                                             | k_CH3C03_N02             | Rickard and Pascoe (2009)                                                   |
| G45137  | TrGCN    | ZCO3C23DBCOD + NO <sub>3</sub> → .62 EZCH3CO2CHCHO + .38 EZCHOCCH3CHO2 + CO <sub>2</sub> + NO <sub>2</sub> | 1.6*KR02N03              | Taraborrelli (2016)                                                         |
| G45138  | TrGCN    | ZCPANC23DBCOD → ZCO3C23DBCOD + NO <sub>2</sub>                                                             | k_PAN_M                  | Rickard and Pascoe (2009)                                                   |
| G45139  | TrGCN    | ZCPANC23DBCOD + OH → .62 EZCH3CO2CHCHO + .38 EZCHOCCH3CHO2 + CO <sub>2</sub> + NO <sub>2</sub>             | 2.52E-11                 | Taraborrelli (2016)*                                                        |
| G45200  | TrGTerC  | C511O2 → CH <sub>3</sub> C(O) + HCOCH2CHO                                                                  | k1_R02s0R02              | Rickard and Pascoe (2009)                                                   |
| G45201  | TrGTerCN | C511O2 + NO → CH <sub>3</sub> C(O) + HCOCH2CHO + NO <sub>2</sub>                                           | KR02N0                   | Rickard and Pascoe (2009)*                                                  |



Table 1: Gas phase reactions (... continued)

| #       | labels   | reaction                                                   | rate coefficient                            | reference                                      |
|---------|----------|------------------------------------------------------------|---------------------------------------------|------------------------------------------------|
| G45202a | TrGTerC  | $C511O2 + HO_2 \rightarrow C511OOH$                        | KR02H02(5)*rcoch2o2_ooH                     | Rickard and Pascoe (2009), Taraborrelli (2016) |
| G45202b | TrGTerC  | $C511O2 + HO_2 \rightarrow CH_3C(O) + HCOCH_2CHO + OH$     | KR02H02(5)*rcoch2o2_oh                      | Rickard and Pascoe (2009), Taraborrelli (2016) |
| G45203  | TrGTerC  | $C511OOH + OH \rightarrow C511O2$                          | 7.49E-11                                    | Rickard and Pascoe (2009)                      |
| G45204  | TrGTerC  | $CO23C4CHO + OH \rightarrow CO23C4CO3$                     | 6.65E-11                                    | Rickard and Pascoe (2009)                      |
| G45205  | TrGTerCN | $CO23C4CHO + NO_3 \rightarrow CO23C4CO3 + HNO_3$           | KN03AL*5.5                                  | Rickard and Pascoe (2009)                      |
| G45206  | TrGTerC  | $CO23C4CO3 \rightarrow CH_3COCOCH_2O_2 + CO_2$             | k1_R02RCO3                                  | Rickard and Pascoe (2009)                      |
| G45207  | TrGTerCN | $CO23C4CO3 + NO \rightarrow CH_3COCOCH_2O_2 + CO_2 + NO_2$ | KAPNO                                       | Rickard and Pascoe (2009)*                     |
| G45208  | TrGTerCN | $CO23C4CO3 + NO_2 \rightarrow C5PAN9$                      | k_CH3CO3_NO2                                | Rickard and Pascoe (2009)                      |
| G45209a | TrGTerC  | $CO23C4CO3 + HO_2 \rightarrow CO23C4CO3H$                  | KAPH02*(rco3_ooH+rco3_o3)                   | Rickard and Pascoe (2009)                      |
| G45209b | TrGTerC  | $CO23C4CO3 + HO_2 \rightarrow CH_3COCOCH_2O_2 + CO_2 + OH$ | KAPH02*rco3_oh                              | Rickard and Pascoe (2009)                      |
| G45210  | TrGTerCN | $C5PAN9 \rightarrow CO23C4CO3 + NO_2$                      | k_PAN_M                                     | Rickard and Pascoe (2009)                      |
| G45211  | TrGTerCN | $C5PAN9 + OH \rightarrow CH_3COCOCHO + CO + NO_2$          | 3.12E-13                                    | Rickard and Pascoe (2009)                      |
| G45212  | TrGTerC  | $C512O2 \rightarrow C513O2$                                | k1_R02pR02                                  | Rickard and Pascoe (2009)                      |
| G45213  | TrGTerC  | $C512O2 + HO_2 \rightarrow C512OOH$                        | KR02H02(5)                                  | Rickard and Pascoe (2009)                      |
| G45214  | TrGTerCN | $C512O2 + NO \rightarrow C513O2 + NO_2$                    | KR02NO                                      | Rickard and Pascoe (2009)*                     |
| G45215  | TrGTerC  | $C512OOH + OH \rightarrow CO13C4CHO + OH$                  | 1.01E-10                                    | Rickard and Pascoe (2009)                      |
| G45216  | TrGTerC  | $C513O2 \rightarrow GLYOX + HOC2H4CO3$                     | k1_R02s0R02                                 | Rickard and Pascoe (2009)                      |
| G45217  | TrGTerCN | $C513O2 + NO \rightarrow GLYOX + HOC2H4CO3 + NO_2$         | KR02NO                                      | Rickard and Pascoe (2009)*                     |
| G45218a | TrGTerC  | $C513O2 + HO_2 \rightarrow C513OOH$                        | KR02H02(5)*rcoch2o2_ooH                     | Rickard and Pascoe (2009), Taraborrelli (2016) |
| G45218b | TrGTerC  | $C513O2 + HO_2 \rightarrow GLYOX + HOC2H4CO3 + OH$         | KR02H02(5)*rcoch2o2_oh                      | Rickard and Pascoe (2009), Taraborrelli (2016) |
| G45219  | TrGTerC  | $CO13C4CHO + OH \rightarrow CHOC3COCO3$                    | 1.33E-10                                    | Rickard and Pascoe (2009)                      |
| G45220  | TrGTerCN | $CO13C4CHO + NO_3 \rightarrow CHOC3COCO3 + HNO_3$          | 2.*KN03AL*5.5                               | Rickard and Pascoe (2009)                      |
| G45221  | TrGTerC  | $C513OOH + OH \rightarrow C513CO + OH$                     | 9.23E-11                                    | Rickard and Pascoe (2009)                      |
| G45222  | TrGTerC  | $CHOC3COCO3 \rightarrow CHOC3COO2 + CO_2$                  | k1_R02RCO3                                  | Rickard and Pascoe (2009)                      |
| G45223  | TrGTerC  | $CHOC3COCO3 + HO_2 \rightarrow CHOC3COOOH$                 | KAPH02                                      | Rickard and Pascoe (2009)                      |
| G45224  | TrGTerCN | $CHOC3COCO3 + NO_2 \rightarrow CHOC3COPAN$                 | k_CH3CO3_NO2                                | Rickard and Pascoe (2009)                      |
| G45225  | TrGTerCN | $CHOC3COCO3 + NO \rightarrow CHOC3COO2 + CO_2 + NO_2$      | KAPNO                                       | Rickard and Pascoe (2009)*                     |
| G45226  | TrGTerC  | $C513CO + OH \rightarrow HOC2H4CO3 + CO + CO$              | 2.64E-11                                    | Rickard and Pascoe (2009)                      |
| G45227  | TrGTerC  | $C514O2 + HO_2 \rightarrow C514OOH$                        | KR02H02(5)                                  | Rickard and Pascoe (2009)                      |
| G45228a | TrGTerCN | $C514O2 + NO \rightarrow CO13C4CHO + HO_2 + NO_2$          | KR02NO*(1.-alpha_AN(7,2,0,1,0, temp, cair)) | Rickard and Pascoe (2009), Taraborrelli (2016) |

Table 1: Gas phase reactions (... continued)

| #       | labels   | reaction                                                                               | rate coefficient                                                                             | reference                                       |
|---------|----------|----------------------------------------------------------------------------------------|----------------------------------------------------------------------------------------------|-------------------------------------------------|
| G45228b | TrGTerCN | $C514O2 + NO \rightarrow C514NO3$                                                      | $KR02N0*\alpha_{AN}(7,2,0,1,0,temp,cair)$                                                    | Rickard and Pascoe (2009), Taraborrelli (2016)  |
| G45229  | TrGTerCN | $C514O2 + NO_3 \rightarrow CO13C4CHO + HO_2 + NO_2$                                    | KR02N03                                                                                      | Rickard and Pascoe (2009)                       |
| G45230  | TrGTerC  | $C514O2 \rightarrow CO13C4CHO + HO_2$                                                  | $k1\_R02sR02$                                                                                | Rickard and Pascoe (2009)                       |
| G45231  | TrGTerC  | $C514OOH + OH \rightarrow CO13C4CHO + OH$                                              | 1.10E-10                                                                                     | Rickard and Pascoe (2009)                       |
| G45232  | TrGTerCN | $C514NO3 + OH \rightarrow CO13C4CHO + NO_2$                                            | 4.33E-11                                                                                     | Rickard and Pascoe (2009)                       |
| G45233  | TrGTerC  | $CHOC3COOOH + OH \rightarrow CHOC3COCO3$                                               | 7.55E-11                                                                                     | Rickard and Pascoe (2009)                       |
| G45234  | TrGTerCN | $CHOC3COPAN \rightarrow CHOC3COCO3 + NO_2$                                             | $k\_PAN\_M$                                                                                  | Rickard and Pascoe (2009)                       |
| G45235  | TrGTerCN | $CHOC3COPAN + OH \rightarrow C4CODIAL + CO + NO_2$                                     | 7.19E-11                                                                                     | Rickard and Pascoe (2009)                       |
| G45236  | TrGTerC  | $MBO + OH \rightarrow LMBOABO2$                                                        | $8.1E-12*EXP(610./TEMP)$                                                                     | Rickard and Pascoe (2009), Taraborrelli (2016)* |
| G45237a | TrGTerC  | $MBO + O_3 \rightarrow HCHO + .16 CH_3COCH_3 + .16 HO_2 + .16 CO + .16 OH + .84 MBOOO$ | $1.0E-17*0.57$                                                                               | Rickard and Pascoe (2009), Taraborrelli (2016)  |
| G45237b | TrGTerC  | $MBO + O_3 \rightarrow IBUTALOH + .63 CO + .37 HOCH_2OOH + .16 OH + .16 HO_2$          | $1.0E-17*0.43$                                                                               | Rickard and Pascoe (2009), Taraborrelli (2016)  |
| G45238  | TrGTerCN | $MBO + NO_3 \rightarrow LNMBOABO2$                                                     | $4.6E-14*EXP(-400./TEMP)$                                                                    | Rickard and Pascoe (2009), Taraborrelli (2016)  |
| G45239  | TrGTerC  | $LMBOABO2 + HO_2 \rightarrow LMBOABOOH$                                                | KR02H02(5)                                                                                   | Rickard and Pascoe (2009), Taraborrelli (2016)  |
| G45240a | TrGTerCN | $LMBOABO2 + NO \rightarrow LMBOABNO3$                                                  | $KR02N0*(.67*\alpha_{AN}(7,2,0,0,0,temp,cair)+.33*\alpha_{AN}(7,1,0,0,0,temp,cair))$         | Rickard and Pascoe (2009), Taraborrelli (2016)  |
| G45240b | TrGTerCN | $LMBOABO2 + NO \rightarrow HOCH_2CHO + CH_3COCH_3 + HO_2 + NO_2$                       | $KR02N0*(1-(.67*\alpha_{AN}(7,2,0,0,0,temp,cair)+.33*\alpha_{AN}(7,1,0,0,0,temp,cair)))*.67$ | Rickard and Pascoe (2009), Taraborrelli (2016)  |
| G45240c | TrGTerCN | $LMBOABO2 + NO \rightarrow IBUTALOH + HCHO + HO_2 + NO_2$                              | $KR02N0*(1-(.67*\alpha_{AN}(7,2,0,0,0,temp,cair)+.33*\alpha_{AN}(7,1,0,0,0,temp,cair)))*.33$ | Rickard and Pascoe (2009), Taraborrelli (2016)  |
| G45241a | TrGTerC  | $LMBOABO2 \rightarrow HOCH_2CHO + CH_3COCH_3 + HO_2$                                   | $k1\_R02s0R02*.67$                                                                           | Rickard and Pascoe (2009), Taraborrelli (2016)  |
| G45241b | TrGTerC  | $LMBOABO2 \rightarrow IBUTALOH + HCHO + HO_2$                                          | $k1\_R02p0R02*.33$                                                                           | Rickard and Pascoe (2009), Taraborrelli (2016)  |
| G45242a | TrGTerC  | $LMBOABOOH + OH \rightarrow MBOACO$                                                    | $.67*2.93E-11+.33*2.05E-12$                                                                  | Rickard and Pascoe (2009), Taraborrelli (2016)  |

Table 1: Gas phase reactions (... continued)

| #       | labels   | reaction                                                                                                                                                                                 | rate coefficient          | reference                                       |
|---------|----------|------------------------------------------------------------------------------------------------------------------------------------------------------------------------------------------|---------------------------|-------------------------------------------------|
| G45242b | TrGTerC  | LMBOABOOH + OH → LMBOABO2                                                                                                                                                                | .6*k_CH300H_OH            | Rickard and Pascoe (2009), Taraborrelli (2016)  |
| G45243  | TrGTerCN | LMBOABNO3 + OH → MBOACO + NO <sub>2</sub>                                                                                                                                                | .67*1.75E-12+.33*2.69E-12 | Rickard and Pascoe (2009), Taraborrelli (2016)  |
| G45244  | TrGTerC  | MBOACO + OH → MBOCOCO + HO <sub>2</sub>                                                                                                                                                  | 3.79E-12                  | Rickard and Pascoe (2009)                       |
| G45245  | TrGTerC  | MBOCOCO + OH → CO + IPRHOCO3                                                                                                                                                             | 1.38E-11                  | Rickard and Pascoe (2009)                       |
| G45246  | TrGTerCN | LNMBOABO2 + HO <sub>2</sub> → LNMBOABOOH                                                                                                                                                 | KR02H02(5)                | Rickard and Pascoe (2009), Taraborrelli (2016)  |
| G45247  | TrGTerCN | LNMBOABO2 + NO → .65 NO <sub>3</sub> CH2CHO + .65 CH <sub>3</sub> COCH <sub>3</sub> + .65 HO <sub>2</sub> + .35 IBUTALOH + .35 HCHO + .35 NO <sub>2</sub> + NO <sub>2</sub>              | KR02N0                    | Rickard and Pascoe (2009), Taraborrelli (2016)* |
| G45248  | TrGTerCN | LNMBOABO2 + NO <sub>3</sub> → .65 NO <sub>3</sub> CH2CHO + .65 CH <sub>3</sub> COCH <sub>3</sub> + .65 HO <sub>2</sub> + .35 IBUTALOH + .35 HCHO + .35 NO <sub>2</sub> + NO <sub>2</sub> | KR02N03                   | Rickard and Pascoe (2009), Taraborrelli (2016)  |
| G45249  | TrGTerCN | LNMBOABO2 → .65 NO <sub>3</sub> CH2CHO + .65 CH <sub>3</sub> COCH <sub>3</sub> + .65 HO <sub>2</sub> + .35 IBUTALOH + .35 HCHO + .35 NO <sub>2</sub>                                     | k1_R02s0R02               | Rickard and Pascoe (2009), Taraborrelli (2016)  |
| G45250a | TrGTerCN | LNMBOABOOH + OH → .65 C4MCONO3OH + .35 NMBOBCO                                                                                                                                           | .65*4.89E-12+.35*2.52E-12 | Rickard and Pascoe (2009), Taraborrelli (2016)  |
| G45250b | TrGTerCN | LNMBOABOOH + OH → LNMBOABO2                                                                                                                                                              | .6*k_CH300H_OH            | Rickard and Pascoe (2009), Taraborrelli (2016)  |
| G45251  | TrGTerCN | NMBOBCO + OH → NC4OHCO3                                                                                                                                                                  | 4.26E-12                  | Rickard and Pascoe (2009)                       |
| G45252a | TrGTerCN | NC4OHCO3 + HO <sub>2</sub> → IBUTALOH + CO <sub>2</sub> + NO <sub>2</sub> + OH                                                                                                           | KAPH02*rco3_oh            | Rickard and Pascoe (2009), Taraborrelli (2016)  |
| G45252b | TrGTerCN | NC4OHCO3 + HO <sub>2</sub> → NC4OHCO3H                                                                                                                                                   | KAPH02*(rco3_o3+rco3_ooH) | Rickard and Pascoe (2009), Taraborrelli (2016)  |
| G45253  | TrGTerCN | NC4OHCO3 + NO → IBUTALOH + CO <sub>2</sub> + NO <sub>2</sub> + NO <sub>2</sub>                                                                                                           | KAPN0                     | Rickard and Pascoe (2009)                       |
| G45254  | TrGTerCN | NC4OHCO3 + NO <sub>2</sub> → NC4OHCPAN                                                                                                                                                   | k_CH3C03_N02              | Rickard and Pascoe (2009)                       |
| G45255  | TrGTerCN | NC4OHCO3 + NO <sub>3</sub> → IBUTALOH + CO <sub>2</sub> + NO <sub>2</sub> + NO <sub>2</sub>                                                                                              | KR02N03*1.74              | Rickard and Pascoe (2009)                       |
| G45256  | TrGTerCN | NC4OHCO3 → IBUTALOH + CO <sub>2</sub> + NO <sub>2</sub>                                                                                                                                  | k1_R02RC03                | Rickard and Pascoe (2009)                       |
| G45257  | TrGTerCN | NC4OHCO3H + OH → NC4OHCO3                                                                                                                                                                | 4.50E-12                  | Rickard and Pascoe (2009)                       |
| G45258  | TrGTerCN | NC4OHCPAN + OH → IBUTALOH + CO + NO <sub>2</sub> + NO <sub>2</sub>                                                                                                                       | 1.27E-12                  | Rickard and Pascoe (2009)                       |
| G45259  | TrGTerCN | NC4OHCPAN → NC4OHCO3 + NO <sub>2</sub>                                                                                                                                                   | K_PAN_M                   | Rickard and Pascoe (2009)                       |
| G45260  | TrGTerCN | C4MCONO3OH + OH → CH <sub>3</sub> COCH <sub>3</sub> + HCHO + CO <sub>2</sub> + NO <sub>2</sub>                                                                                           | 1.23E-12                  | Rickard and Pascoe (2009), Taraborrelli (2016)  |
| G45400  | TrGAroCN | NC4MDCO2HN + OH → MMALANHY + NO <sub>2</sub>                                                                                                                                             | 0.6*k_CH300H_OH           | Rickard and Pascoe (2009)*                      |

Table 1: Gas phase reactions (... continued)

| #       | labels   | reaction                                                                                              | rate coefficient                             | reference                                      |
|---------|----------|-------------------------------------------------------------------------------------------------------|----------------------------------------------|------------------------------------------------|
| G45401  | TrGAroCN | $C54CO + NO_3 \rightarrow 3 CO + CH_3C(O)OO + HNO_3$                                                  | $KNO3AL*5.5$                                 | Rickard and Pascoe (2009)                      |
| G45402  | TrGAroC  | $C54CO + OH \rightarrow 3 CO + CH_3C(O)OO$                                                            | $1.72E-11$                                   | Rickard and Pascoe (2009)                      |
| G45403a | TrGAroCN | $NTLFUO2 + HO_2 \rightarrow NTLFUOOH$                                                                 | $KRO2H02(5)*(1-rcoch2o2\_oh)$                | Rickard and Pascoe (2009)                      |
| G45403b | TrGAroCN | $NTLFUO2 + HO_2 \rightarrow ACCOMECHO + NO_2 + OH$                                                    | $KRO2H02(5)*rcoch2o2\_oh$                    | Rickard and Pascoe (2009)                      |
| G45404  | TrGAroCN | $NTLFUO2 + NO \rightarrow ACCOMECHO + NO_2 + NO_2$                                                    | $KRO2NO$                                     | Rickard and Pascoe (2009)*                     |
| G45405  | TrGAroCN | $NTLFUO2 + NO_3 \rightarrow ACCOMECHO + NO_2 + NO_2$                                                  | $KRO2NO3$                                    | Rickard and Pascoe (2009)*                     |
| G45406  | TrGAroCN | $NTLFUO2 \rightarrow ACCOMECHO + NO_2$                                                                | $k1\_R02t0R02$                               | Rickard and Pascoe (2009)*                     |
| G45407  | TrGAroC  | $C5134CO2OH + OH \rightarrow C54CO + HO_2$                                                            | $7.48E-11$                                   | Rickard and Pascoe (2009)                      |
| G45408  | TrGAroCN | $C5COO2NO2 + OH \rightarrow MGLYOX + CO + CO + NO_2$                                                  | $5.43E-11$                                   | Rickard and Pascoe (2009)                      |
| G45409  | TrGAroCN | $C5COO2NO2 \rightarrow C5CO14O2 + NO_2$                                                               | $k\_PAN\_M$                                  | Rickard and Pascoe (2009)*                     |
| G45410  | TrGAroC  | $C5DIALOOH + OH \rightarrow C5DIALCO + OH$                                                            | $7.52E-11$                                   | Rickard and Pascoe (2009)                      |
| G45411a | TrGAroC  | $C4CO2DBC03 + HO_2 \rightarrow C4CO2DCO3H$                                                            | $KAPH02*(rco3\_ooh+rco3\_o3)$                | Rickard and Pascoe (2009)                      |
| G45411b | TrGAroC  | $C4CO2DBC03 + HO_2 \rightarrow HO_2 + CO + HCOCOCHO + CO_2 + OH$                                      | $KAPH02*rco3\_oh$                            | Rickard and Pascoe (2009), Taraborrelli (2016) |
| G45412  | TrGAroCN | $C4CO2DBC03 + NO \rightarrow HO_2 + CO + HCOCOCHO + CO_2 + NO_2$                                      | $KAPNO$                                      | Rickard and Pascoe (2009)                      |
| G45413  | TrGAroCN | $C4CO2DBC03 + NO_2 \rightarrow C4CO2DBPAN$                                                            | $k\_CH3C03\_NO2$                             | Rickard and Pascoe (2009)*                     |
| G45414  | TrGAroCN | $C4CO2DBC03 + NO_3 \rightarrow HO_2 + CO + HCOCOCHO + CO_2 + NO_2$                                    | $KRO2NO3*1.74$                               | Rickard and Pascoe (2009)                      |
| G45415  | TrGAroC  | $C4CO2DBC03 \rightarrow HO_2 + CO + HCOCOCHO + CO_2$                                                  | $k1\_R02RC03$                                | Rickard and Pascoe (2009)                      |
| G45416  | TrGAroC  | $MMALANHY + OH \rightarrow MMALANHYO2$                                                                | $1.50E-12$                                   | Rickard and Pascoe (2009)                      |
| G45421a | TrGAroC  | $MMALANHYO2 + HO_2 \rightarrow MMALNHYOOH$                                                            | $KRO2H02(5)*(1-rcoch2o2\_oh-rchohch2o2\_oh)$ | Rickard and Pascoe (2009), Taraborrelli (2016) |
| G45421b | TrGAroC  | $MMALANHYO2 + HO_2 \rightarrow CO2H3CO3 + CO_2 + OH$                                                  | $KRO2H02(5)*(rcoch2o2\_oh+rchohch2o2\_oh)$   | Rickard and Pascoe (2009), Taraborrelli (2016) |
| G45422  | TrGAroCN | $MMALANHYO2 + NO \rightarrow CO2H3CO3 + CO_2 + NO_2$                                                  | $KRO2NO$                                     | Rickard and Pascoe (2009)*                     |
| G45423  | TrGAroCN | $MMALANHYO2 + NO_3 \rightarrow CO2H3CO3 + CO_2 + NO_2$                                                | $KRO2NO3$                                    | Rickard and Pascoe (2009)*                     |
| G45424  | TrGAroC  | $MMALANHYO2 \rightarrow CO2H3CO3 + CO_2$                                                              | $k1\_R02t0R02$                               | Rickard and Pascoe (2009)*                     |
| G45428  | TrGAroCN | $C4CO2DBPAN + OH \rightarrow HCOCOCHO + CO_2 + CO + NO_2$                                             | $2.74E-11$                                   | Rickard and Pascoe (2009)                      |
| G45429  | TrGAroCN | $C4CO2DBPAN \rightarrow C4CO2DBC03 + NO_2$                                                            | $k\_PAN\_M$                                  | Rickard and Pascoe (2009)*                     |
| G45430a | TrGAroC  | $C5CO14O2 + HO_2 \rightarrow .83 MALANHY + .83 CH_3 + .17 MGLYOX + .17 HO_2 + .17 CO + .17 CO_2 + OH$ | $KAPH02*rco3\_oh$                            | Rickard and Pascoe (2009)*                     |
| G45430b | TrGAroC  | $C5CO14O2 + HO_2 \rightarrow C5CO14OH + O_3$                                                          | $KAPH02*rco3\_o3$                            | Rickard and Pascoe (2009)                      |
| G45430c | TrGAroC  | $C5CO14O2 + HO_2 \rightarrow C5CO14OOH$                                                               | $KAPH02*rco3\_ooh$                           | Rickard and Pascoe (2009)                      |

Table 1: Gas phase reactions (... continued)

| #       | labels   | reaction                                                                                                                                                                                                                                                                                                                                             | rate coefficient          | reference                  |
|---------|----------|------------------------------------------------------------------------------------------------------------------------------------------------------------------------------------------------------------------------------------------------------------------------------------------------------------------------------------------------------|---------------------------|----------------------------|
| G45431  | TrGAroCN | $C5CO14O2 + NO \rightarrow .83 \text{ MALANHY} + .83 \text{ CH}_3 + .17 \text{ MGLYOX} + .17 \text{ HO}_2 + .17 \text{ CO} + .17 \text{ CO}_2 + \text{NO}_2$                                                                                                                                                                                         | KAPNO                     | Rickard and Pascoe (2009)* |
| G45432  | TrGAroCN | $C5CO14O2 + \text{NO}_2 \rightarrow C5COO2\text{NO}_2$                                                                                                                                                                                                                                                                                               | k_CH3C03_NO2              | Rickard and Pascoe (2009)* |
| G45433  | TrGAroCN | $C5CO14O2 + \text{NO}_3 \rightarrow .83 \text{ MALANHY} + .83 \text{ CH}_3 + .17 \text{ MGLYOX} + .17 \text{ HO}_2 + .17 \text{ CO} + .17 \text{ CO}_2 + \text{NO}_2$                                                                                                                                                                                | KR02N03*1.74              | Rickard and Pascoe (2009)* |
| G45434  | TrGAroC  | $C5CO14O2 \rightarrow .83 \text{ MALANHY} + .83 \text{ CH}_3 + .17 \text{ MGLYOX} + .17 \text{ HO}_2 + .17 \text{ CO} + .17 \text{ CO}_2$                                                                                                                                                                                                            | k1_R02RC03                | Rickard and Pascoe (2009)* |
| G45436  | TrGAroC  | $C5CO14OH + OH \rightarrow .83 \text{ MALANHY} + .83 \text{ CH}_3 + .17 \text{ MGLYOX} + .17 \text{ HO}_2 + .17 \text{ CO} + .17 \text{ CO}_2$                                                                                                                                                                                                       | 5.44E-11                  | Rickard and Pascoe (2009)* |
| G45441  | TrGAroCN | $C5DICARB + \text{NO}_3 \rightarrow C5CO14O2 + \text{HNO}_3$                                                                                                                                                                                                                                                                                         | KN03AL*2.75               | Rickard and Pascoe (2009)  |
| G45442  | TrGAroC  | $C5DICARB + \text{O}_3 \rightarrow .5338 \text{ GLYOX} + .063 \text{ CH}_3\text{CHO} + .348 \text{ CH}_3\text{C(O)OO} + .918 \text{ CO} + .57 \text{ OH} + .473 \text{ HO}_2 + .0563 \text{ CH}_3\text{COCO}_2\text{H} + .5338 \text{ MGLYOX} + .676 \text{ H}_2\text{O}_2 + .063 \text{ HCHO} + .0563 \text{ HCOCO}_2\text{H} + .2465 \text{ CO}_2$ | 2.00E-18                  | Rickard and Pascoe (2009)  |
| G45443  | TrGAroC  | $C5DICARB + OH \rightarrow .48 \text{ C5CO14O2} + .52 \text{ C5DICARBO2}$                                                                                                                                                                                                                                                                            | 6.2E-11                   | Rickard and Pascoe (2009)  |
| G45444  | TrGAroC  | $\text{MC3ODBCO}_2\text{H} + OH \rightarrow .35 \text{ GLYOX} + .35 \text{ CH}_3 + .35 \text{ CO} + .35 \text{ CO}_2 + .65 \text{ MMALANHY} + .65 \text{ HO}_2$                                                                                                                                                                                      | 4.38E-11                  | Rickard and Pascoe (2009)* |
| G45451  | TrGAroCN | $\text{TLFUONE} + \text{NO}_3 \rightarrow \text{NTLFUO}_2$                                                                                                                                                                                                                                                                                           | 1.00E-12                  | Rickard and Pascoe (2009)  |
| G45452  | TrGAroC  | $\text{TLFUONE} + \text{O}_3 \rightarrow .5 \text{ CO} + .5 \text{ OH} + .5 \text{ MECOACETO}_2 + .3125 \text{ C24O3CCO}_2\text{H} + .1875 \text{ ACCOMECHO} + .1875 \text{ H}_2\text{O}_2$                                                                                                                                                          | 8.00E-19                  | see note*                  |
| G45453  | TrGAroC  | $\text{TLFUONE} + OH \rightarrow \text{TLFUO}_2$                                                                                                                                                                                                                                                                                                     | 6.90E-11                  | Rickard and Pascoe (2009)  |
| G45454a | TrGAroC  | $\text{ACCOMECO}_3 + \text{HO}_2 \rightarrow \text{ACCOMECO}_3\text{H}$                                                                                                                                                                                                                                                                              | KAPH02*(rco3_ooh+rco3_o3) | Rickard and Pascoe (2009)  |
| G45454b | TrGAroC  | $\text{ACCOMECO}_3 + \text{HO}_2 \rightarrow \text{MECOACETO}_2 + \text{CO}_2 + \text{OH}$                                                                                                                                                                                                                                                           | KAPH02*rco3_oh            | Rickard and Pascoe (2009)  |
| G45455  | TrGAroCN | $\text{ACCOMECO}_3 + \text{NO} \rightarrow \text{MECOACETO}_2 + \text{CO}_2 + \text{NO}_2$                                                                                                                                                                                                                                                           | KAPNO                     | Rickard and Pascoe (2009)  |
| G45456  | TrGAroCN | $\text{ACCOMECO}_3 + \text{NO}_2 \rightarrow \text{ACCOMEPAN}$                                                                                                                                                                                                                                                                                       | k_CH3C03_NO2              | Rickard and Pascoe (2009)* |
| G45457  | TrGAroCN | $\text{ACCOMECO}_3 + \text{NO}_3 \rightarrow \text{MECOACETO}_2 + \text{CO}_2 + \text{NO}_2$                                                                                                                                                                                                                                                         | KR02N03*1.74              | Rickard and Pascoe (2009)  |
| G45458  | TrGAroC  | $\text{ACCOMECO}_3 \rightarrow \text{MECOACETO}_2 + \text{CO}_2$                                                                                                                                                                                                                                                                                     | k1_R02RC03                | Rickard and Pascoe (2009)  |
| G45459  | TrGAroC  | $\text{C4CO}_2\text{DCO}_3\text{H} + OH \rightarrow \text{C4CO}_2\text{DBCO}_3$                                                                                                                                                                                                                                                                      | 3.06E-11                  | Rickard and Pascoe (2009)  |
| G45464  | TrGAroCN | $\text{ACCOMECO}_3 + \text{NO}_3 \rightarrow \text{ACCOMECO}_3 + \text{HNO}_3$                                                                                                                                                                                                                                                                       | KN03AL*5.5                | Rickard and Pascoe (2009)  |
| G45465  | TrGAroC  | $\text{ACCOMECO}_3 + OH \rightarrow \text{ACCOMECO}_3$                                                                                                                                                                                                                                                                                               | 7.09E-11                  | Rickard and Pascoe (2009)  |
| G45466  | TrGAroC  | $\text{MMALNHYOOH} + OH \rightarrow \text{MMALANHYO}_2$                                                                                                                                                                                                                                                                                              | 1.69E-11                  | Rickard and Pascoe (2009)  |
| G45467a | TrGAroC  | $\text{C5DICAROOH} + OH \rightarrow \text{C5134CO}_2\text{OH} + \text{OH}$                                                                                                                                                                                                                                                                           | 1.21E-10                  | Rickard and Pascoe (2009)  |
| G45467b | TrGAroC  | $\text{C5DICAROOH} + OH \rightarrow \text{C5DICARBO}_2$                                                                                                                                                                                                                                                                                              | 0.6*k_CH300H_OH           | Rickard and Pascoe (2009)  |
| G45468  | TrGAroC  | $\text{C24O3CCO}_2\text{H} + OH \rightarrow \text{MECOACETO}_2 + \text{CO}_2$                                                                                                                                                                                                                                                                        | 8.76E-13                  | Rickard and Pascoe (2009)  |

Table 1: Gas phase reactions (... continued)

| #       | labels   | reaction                                                                          | rate coefficient                         | reference                                      |
|---------|----------|-----------------------------------------------------------------------------------|------------------------------------------|------------------------------------------------|
| G45469  | TrGAroCN | NTLFUOOH + OH → NTLFUO2                                                           | 4.44E-12                                 | Rickard and Pascoe (2009)                      |
| G45470  | TrGAroCN | ACCOMEPAN + OH → METACETHO + CO + CO + NO <sub>2</sub>                            | 1.00E-14                                 | Rickard and Pascoe (2009)                      |
| G45471  | TrGAroCN | ACCOMEPAN → ACCOMEEO3 + NO <sub>2</sub>                                           | k_PAN_M                                  | Rickard and Pascoe (2009)                      |
| G45476a | TrGAroC  | TLFUO2 + HO <sub>2</sub> → TLFUOOH                                                | KR02H02(5)*(1-rcoch2o2_oh-rchohch2o2_oh) | Rickard and Pascoe (2009)                      |
| G45476b | TrGAroC  | TLFUO2 + HO <sub>2</sub> → ACCOMECHO + HO <sub>2</sub> + OH                       | KR02H02(5)*(rcoch2o2_oh+rchohch2o2_oh)   | Rickard and Pascoe (2009)*                     |
| G45477  | TrGAroCN | TLFUO2 + NO → ACCOMECHO + HO <sub>2</sub> + NO <sub>2</sub>                       | KR02N0                                   | Rickard and Pascoe (2009)*                     |
| G45478  | TrGAroCN | TLFUO2 + NO <sub>3</sub> → ACCOMECHO + HO <sub>2</sub> + NO <sub>2</sub>          | KR02N03                                  | Rickard and Pascoe (2009)*                     |
| G45479  | TrGAroC  | TLFUO2 → ACCOMECHO + HO <sub>2</sub>                                              | k1_R02t0R02                              | Rickard and Pascoe (2009)*                     |
| G45480  | TrGAroC  | C5CO14OOH + OH → C5CO14O2                                                         | 3.59E-12                                 | Rickard and Pascoe (2009)                      |
| G45483  | TrGAroC  | TLFUOOH + OH → TLFUO2                                                             | 2.53E-11                                 | Rickard and Pascoe (2009)                      |
| G45485  | TrGAroC  | ACCOMEO3H + OH → ACCOMEEO3                                                        | 3.59E-12                                 | Rickard and Pascoe (2009)                      |
| G45486a | TrGAroC  | C5DIALO2 + HO <sub>2</sub> → C5DIALOOH                                            | KR02H02(5)*(1-rcoch2o2_oh)               | Rickard and Pascoe (2009)                      |
| G45486b | TrGAroC  | C5DIALO2 + HO <sub>2</sub> → MALDIAL + CO + HO <sub>2</sub> + OH                  | KR02H02(5)*rcoch2o2_oh                   | Rickard and Pascoe (2009)*                     |
| G45487  | TrGAroCN | C5DIALO2 + NO → MALDIAL + CO + HO <sub>2</sub> + NO <sub>2</sub>                  | KR02N0                                   | Rickard and Pascoe (2009)*                     |
| G45488  | TrGAroCN | C5DIALO2 + NO <sub>3</sub> → MALDIAL + CO + HO <sub>2</sub> + NO <sub>2</sub>     | KR02N03                                  | Rickard and Pascoe (2009)*                     |
| G45489  | TrGAroC  | C5DIALO2 → MALDIAL + CO + HO <sub>2</sub>                                         | k1_R02s0R02                              | Rickard and Pascoe (2009)*                     |
| G45490a | TrGAroC  | C5DICARBO2 + HO <sub>2</sub> → C5DICAROOH                                         | KR02H02(5)*(rco3_ooH+rco3_o3)            | Rickard and Pascoe (2009)                      |
| G45491b | TrGAroC  | C5DICARBO2 + HO <sub>2</sub> → MGLYOX + GLYOX + HO <sub>2</sub> + OH              | KR02H02(5)*rco3_oh                       | Rickard and Pascoe (2009)*                     |
| G45492  | TrGAroCN | C5DICARBO2 + NO → MGLYOX + GLYOX + HO <sub>2</sub> + NO <sub>2</sub>              | KR02N0                                   | Rickard and Pascoe (2009)*                     |
| G45493  | TrGAroCN | C5DICARBO2 + NO <sub>3</sub> → MGLYOX + GLYOX + HO <sub>2</sub> + NO <sub>2</sub> | KR02N03                                  | Rickard and Pascoe (2009)*                     |
| G45494  | TrGAroC  | C5DICARBO2 → MGLYOX + GLYOX + HO <sub>2</sub>                                     | k1_R02s0R02                              | Rickard and Pascoe (2009)*                     |
| G46200a | TrGTerC  | CO235C6O2 + HO <sub>2</sub> → CO235C6OOH                                          | KR02H02(6)*rcoch2o2_ooH                  | Rickard and Pascoe (2009), Taraborrelli (2016) |
| G46200b | TrGTerC  | CO235C6O2 + HO <sub>2</sub> → CO23C4CO3 + HCHO + OH                               | KR02H02(6)*rcoch2o2_oh                   | Rickard and Pascoe (2009), Taraborrelli (2016) |
| G46201  | TrGTerCN | CO235C6O2 + NO → CO23C4CO3 + HCHO + NO <sub>2</sub>                               | KR02N0                                   | Rickard and Pascoe (2009)*                     |
| G46202  | TrGTerC  | CO235C6O2 → CO23C4CO3 + HCHO                                                      | k1_R02p0R02                              | Rickard and Pascoe (2009)                      |
| G46203  | TrGTerC  | CO235C6OOH + OH → CO235C6O2                                                       | 1.01E-11                                 | Rickard and Pascoe (2009)                      |
| G46204  | TrGTerC  | C614O2 → CO23C4CHO + HCHO + HO <sub>2</sub>                                       | k1_R02s0R02                              | Rickard and Pascoe (2009)                      |

Table 1: Gas phase reactions (... continued)

| #       | labels   | reaction                                                               | rate coefficient                                               | reference                                      |
|---------|----------|------------------------------------------------------------------------|----------------------------------------------------------------|------------------------------------------------|
| G46205a | TrGTerCN | $C614O2 + NO \rightarrow CO23C4CHO + HCHO + HO_2 + NO_2$               | $KR02N0*(1.-\alpha_{AN}(9,2,0,1,0, \text{temp}, \text{cair}))$ | Rickard and Pascoe (2009)                      |
| G46205b | TrGTerCN | $C614O2 + NO \rightarrow C614NO3$                                      | $KR02N0*\alpha_{AN}(9,2,0,1,0, \text{temp}, \text{cair})$      | Rickard and Pascoe (2009)                      |
| G46206a | TrGTerC  | $C614O2 + HO_2 \rightarrow C614OOH$                                    | $KR02H02(6)*(1.-r_{chohch2o2\_oh})$                            | Rickard and Pascoe (2009), Taraborrelli (2016) |
| G46206b | TrGTerC  | $C614O2 + HO_2 \rightarrow CO23C4CHO + HCHO + HO_2 + OH$               | $KR02H02(6)*r_{chohch2o2\_oh}$                                 | Rickard and Pascoe (2009), Taraborrelli (2016) |
| G46207  | TrGTerCN | $C614NO3 + OH \rightarrow C614CO + NO_2$                               | 7.11E-12                                                       | Rickard and Pascoe (2009)                      |
| G46208  | TrGTerC  | $C614OOH + OH \rightarrow C614CO + OH$                                 | 8.69E-11                                                       | Rickard and Pascoe (2009)                      |
| G46209  | TrGTerC  | $C614CO + OH \rightarrow CO235C5CHO + HO_2$                            | 3.22E-12                                                       | Rickard and Pascoe (2009)                      |
| G46210  | TrGTerC  | $CO235C5CHO + OH \rightarrow CO23C4CO3 + CO$                           | 1.33E-11                                                       | Rickard and Pascoe (2009)                      |
| G46211  | TrGTerCN | $CO235C5CHO + NO_3 \rightarrow CO23C4CO3 + CO + HNO_3$                 | $KN03AL*5.5$                                                   | Rickard and Pascoe (2009)                      |
| G46400  | TrGAroC  | $PHENO0H + OH \rightarrow PHENO2$                                      | 1.16E-10                                                       | Rickard and Pascoe (2009)                      |
| G46401  | TrGAroC  | $C6CO4DB + OH \rightarrow CO + CO + HO_2 + CO + HCOCOCHO$              | 7.70E-11                                                       | Rickard and Pascoe (2009)                      |
| G46402  | TrGAroC  | $C5CO2DCO3H + OH \rightarrow C5CO2DBCO3$                               | 3.60E-11                                                       | Rickard and Pascoe (2009)                      |
| G46403  | TrGAroCN | $NDNPHE00H + OH \rightarrow NDNPHENO2$                                 | $0.6*k_{CH300H\_OH}$                                           | Rickard and Pascoe (2009)                      |
| G46404a | TrGAroC  | $C615CO2O2 + HO_2 \rightarrow C615CO2OOH$                              | $KR02H02(6)*(1.-r_{coch2o2\_oh})$                              | Rickard and Pascoe (2009)                      |
| G46404b | TrGAroC  | $C615CO2O2 + HO_2 \rightarrow C5DICARB + CO + HO_2 + OH$               | $KR02H02(6)*r_{coch2o2\_oh}$                                   | Rickard and Pascoe (2009)*                     |
| G46405  | TrGAroCN | $C615CO2O2 + NO \rightarrow C5DICARB + CO + HO_2 + NO_2$               | $KR02N0$                                                       | Rickard and Pascoe (2009)*                     |
| G46406  | TrGAroCN | $C615CO2O2 + NO_3 \rightarrow C5DICARB + CO + HO_2 + NO_2$             | $KR02N03$                                                      | Rickard and Pascoe (2009)*                     |
| G46407  | TrGAroC  | $C615CO2O2 \rightarrow C5DICARB + CO + HO_2$                           | $k1\_R02s0R02$                                                 | Rickard and Pascoe (2009)*                     |
| G46408  | TrGAroCN | $BZEMUCPAN + OH \rightarrow MALDIAL + CO + CO_2 + NO_2$                | 4.05E-11                                                       | Rickard and Pascoe (2009)                      |
| G46409  | TrGAroCN | $BZEMUCPAN \rightarrow BZEMUCCO3 + NO_2$                               | $k_{PAN\_M}$                                                   | Rickard and Pascoe (2009)                      |
| G46410  | TrGAroCN | $BZBIPERNO3 + OH \rightarrow BZOBIPEROH + NO_2$                        | 7.30E-11                                                       | Rickard and Pascoe (2009)                      |
| G46411  | TrGAroCN | $HOC6H4NO2 + NO_3 \rightarrow NPHEN1O + HNO_3$                         | 9.00E-14                                                       | Rickard and Pascoe (2009)                      |
| G46412  | TrGAroCN | $HOC6H4NO2 + OH \rightarrow NPHEN1O$                                   | 9.00E-13                                                       | Rickard and Pascoe (2009)                      |
| G46413a | TrGAroCN | $NDNPHE02 + HO_2 \rightarrow NDNPHENO0H$                               | $KR02H02(6)*(1.-r_{chohch2o2\_oh})$                            | Rickard and Pascoe (2009)                      |
| G46413b | TrGAroCN | $NDNPHE02 + HO_2 \rightarrow NC4DCO2H + HNO_3 + CO + CO + NO_2 + OH$   | $KR02H02(6)*r_{chohch2o2\_oh}$                                 | Rickard and Pascoe (2009)*                     |
| G46414  | TrGAroCN | $NDNPHE02 + NO \rightarrow NC4DCO2H + HNO_3 + CO + CO + NO_2 + NO_2$   | $KR02N0$                                                       | Rickard and Pascoe (2009)*                     |
| G46415  | TrGAroCN | $NDNPHE02 + NO_3 \rightarrow NC4DCO2H + HNO_3 + CO + CO + NO_2 + NO_2$ | $KR02N03$                                                      | Rickard and Pascoe (2009)*                     |

Table 1: Gas phase reactions (... continued)

| #       | labels   | reaction                                                                                                                                                                                            | rate coefficient             | reference                  |
|---------|----------|-----------------------------------------------------------------------------------------------------------------------------------------------------------------------------------------------------|------------------------------|----------------------------|
| G46416  | TrGAroCN | NDNPHEO2 → NC4DCO2H + HNO <sub>3</sub> + CO + CO + NO <sub>2</sub>                                                                                                                                  | k1_R02IS0PD02                | Rickard and Pascoe (2009)* |
| G46417  | TrGAroC  | PBZQCO + OH → C5CO2OHCO3                                                                                                                                                                            | 6.07E-11                     | Rickard and Pascoe (2009)  |
| G46418  | TrGAroCN | CATECHOL + NO <sub>3</sub> → CATEC1O + HNO <sub>3</sub>                                                                                                                                             | 9.9E-11                      | Rickard and Pascoe (2009)* |
| G46419  | TrGAroC  | CATECHOL + O <sub>3</sub> → MALDALCO2H + HCOCO <sub>2</sub> H + HO <sub>2</sub> + OH                                                                                                                | 9.2E-18                      | Rickard and Pascoe (2009)  |
| G46420  | TrGAroC  | CATECHOL + OH → CATEC1O                                                                                                                                                                             | 1.0E-10                      | Rickard and Pascoe (2009)  |
| G46421  | TrGAroC  | C5COOHCO3H + OH → C5CO2OHCO3                                                                                                                                                                        | 8.01E-11                     | Rickard and Pascoe (2009)  |
| G46422  | TrGAroCN | NCATECHOL + NO <sub>3</sub> → NNCATECO2                                                                                                                                                             | 2.60E-12                     | Rickard and Pascoe (2009)  |
| G46423  | TrGAroCN | NCATECHOL + OH → NCATECO2                                                                                                                                                                           | 3.47E-12                     | Rickard and Pascoe (2009)  |
| G46424a | TrGAroC  | C5CO2OHCO3 + HO <sub>2</sub> → C5COOHCO3H                                                                                                                                                           | KAPH02*(rco3_ooh+rco3_o3)    | Rickard and Pascoe (2009)  |
| G46424b | TrGAroC  | C5CO2OHCO3 + HO <sub>2</sub> → HOCOC4DIAL + HO <sub>2</sub> + CO + CO <sub>2</sub> + OH                                                                                                             | KAPH02*rco3_oh               | Rickard and Pascoe (2009)  |
| G46425  | TrGAroCN | C5CO2OHCO3 + NO → HOCOC4DIAL + HO <sub>2</sub> + CO + CO <sub>2</sub> + NO <sub>2</sub>                                                                                                             | KAPNO                        | Rickard and Pascoe (2009)  |
| G46426  | TrGAroCN | C5CO2OHCO3 + NO <sub>2</sub> → C5CO2OHPAN                                                                                                                                                           | k_CH3C03_NO2                 | Rickard and Pascoe (2009)* |
| G46427  | TrGAroCN | C5CO2OHCO3 + NO <sub>3</sub> → HOCOC4DIAL + HO <sub>2</sub> + CO + CO <sub>2</sub> + NO <sub>2</sub>                                                                                                | KR02N03*1.74                 | Rickard and Pascoe (2009)  |
| G46428  | TrGAroC  | C5CO2OHCO3 → HOCOC4DIAL + HO <sub>2</sub> + CO + CO <sub>2</sub>                                                                                                                                    | k1_R02RC03                   | Rickard and Pascoe (2009)  |
| G46429  | TrGAroCN | BZEPOXMUC + NO <sub>3</sub> → BZEMUCCO3 + HNO <sub>3</sub>                                                                                                                                          | 2*KN03AL*2.75                | Rickard and Pascoe (2009)  |
| G46430  | TrGAroC  | BZEPOXMUC + O <sub>3</sub> → EPXC4DIAL + .125 HCHO + .1125 HCOCO <sub>2</sub> H + .0675 GLYOX + .0675 H <sub>2</sub> O <sub>2</sub> + .82 HO <sub>2</sub> + .57 OH + 1.265 CO + .25 CO <sub>2</sub> | 2.00E-18                     | Rickard and Pascoe (2009)* |
| G46431  | TrGAroC  | BZEPOXMUC + OH → .31 BZEMUCCO3 + .69 BZEMUCO2                                                                                                                                                       | 6.08E-11                     | Rickard and Pascoe (2009)  |
| G46432a | TrGAroCN | NCATECO2 + HO <sub>2</sub> → NCATECOOH                                                                                                                                                              | KR02H02(6)*(1-rchohch2o2_oh) | Rickard and Pascoe (2009)  |
| G46432b | TrGAroCN | NCATECO2 + HO <sub>2</sub> → NC4DCO2H + HCOCO <sub>2</sub> H + HO <sub>2</sub> + OH                                                                                                                 | KR02H02(6)*rchohch2o2_oh     | Rickard and Pascoe (2009)* |
| G46433  | TrGAroCN | NCATECO2 + NO → NC4DCO2H + HCOCO <sub>2</sub> H + HO <sub>2</sub> + NO <sub>2</sub>                                                                                                                 | KR02N0                       | Rickard and Pascoe (2009)* |
| G46434  | TrGAroCN | NCATECO2 + NO <sub>3</sub> → NC4DCO2H + HCOCO <sub>2</sub> H + HO <sub>2</sub> + NO <sub>2</sub>                                                                                                    | KR02N03                      | Rickard and Pascoe (2009)* |
| G46435  | TrGAroCN | NCATECO2 → NC4DCO2H + HCOCO <sub>2</sub> H + HO <sub>2</sub>                                                                                                                                        | k1_R02IS0PD02                | Rickard and Pascoe (2009)* |
| G46436  | TrGAroCN | NPHEN1OOH + OH → NPHEN1O2                                                                                                                                                                           | 9.00E-13                     | Rickard and Pascoe (2009)  |
| G46437a | TrGAroCN | NPHEO2 + HO <sub>2</sub> → NPHEOOH                                                                                                                                                                  | KR02H02(6)*(1-rchohch2o2_oh) | Rickard and Pascoe (2009)  |



Table 1: Gas phase reactions (... continued)

| #       | labels   | reaction                                                                                                    | rate coefficient             | reference                                         |
|---------|----------|-------------------------------------------------------------------------------------------------------------|------------------------------|---------------------------------------------------|
| G46437b | TrGAroCN | NPHENO2 + HO <sub>2</sub> → MALDALCO2H + GLYOX + NO <sub>2</sub><br>+ OH                                    | KR02H02(6)*rchohch2o2_oh     | Rickard and Pascoe (2009)*                        |
| G46438  | TrGAroCN | NPHENO2 + NO → MALDALCO2H + GLYOX + NO <sub>2</sub><br>+ NO <sub>2</sub>                                    | KR02N0                       | Rickard and Pascoe (2009)*                        |
| G46439  | TrGAroCN | NPHENO2 + NO <sub>3</sub> → MALDALCO2H + GLYOX + NO <sub>2</sub><br>+ NO <sub>2</sub>                       | KR02N03                      | Rickard and Pascoe (2009)*                        |
| G46440  | TrGAroCN | NPHENO2 → MALDALCO2H + GLYOX + NO <sub>2</sub>                                                              | k1_R02ISOPD02                | Rickard and Pascoe (2009)*                        |
| G46441  | TrGAroC  | BENZENE + OH → .352 BZBIPERO2 + .118<br>BZEPOXMUC + .118 HO <sub>2</sub> + .53 PHENOL + .53 HO <sub>2</sub> | 2.3E-12*EXP(-190/TEMP)       | Rickard and Pascoe (2009)*                        |
| G46442  | TrGAroCN | C5CO2OHPAN + OH → HOCOC4DIAL + CO + CO +<br>NO <sub>2</sub>                                                 | 7.66E-11                     | Rickard and Pascoe (2009)                         |
| G46443  | TrGAroCN | C5CO2OHPAN → C5CO2OHCO3 + NO <sub>2</sub>                                                                   | k_PAN_M                      | Rickard and Pascoe (2009)                         |
| G46444  | TrGAroCN | CATEC10 + NO <sub>2</sub> → NCATECHOL                                                                       | k_C6H50_N02                  | Rickard and Pascoe (2009), Platz<br>et al. (1998) |
| G46445  | TrGAroC  | CATEC10 + O <sub>3</sub> → CATEC1O2                                                                         | k_C6H50_03                   | Rickard and Pascoe (2009), Tao<br>and Li (1999)   |
| G46446  | TrGAroC  | BZEMUCCO + OH → EPXDLCO3 + GLYOX                                                                            | 9.20E-11                     | Rickard and Pascoe (2009)                         |
| G46447a | TrGAroCN | NNCATECO2 + HO <sub>2</sub> → NNCATECOOH                                                                    | KR02H02(6)*(1-rchohch2o2_oh) | Rickard and Pascoe (2009)                         |
| G46447b | TrGAroCN | NNCATECO2 + HO <sub>2</sub> → NC4DCO2H + HCOCO <sub>2</sub> H +<br>NO <sub>2</sub> + OH                     | KR02H02(6)*rchohch2o2_oh     | Rickard and Pascoe (2009)*                        |
| G46448  | TrGAroCN | NNCATECO2 + NO → NC4DCO2H + HCOCO <sub>2</sub> H + NO <sub>2</sub><br>+ NO <sub>2</sub>                     | KR02N0                       | Rickard and Pascoe (2009)*                        |
| G46449  | TrGAroCN | NNCATECO2 + NO <sub>3</sub> → NC4DCO2H + HCOCO <sub>2</sub> H +<br>NO <sub>2</sub> + NO <sub>2</sub>        | KR02N03                      | Rickard and Pascoe (2009)*                        |
| G46450  | TrGAroCN | NNCATECO2 → NC4DCO2H + HCOCO <sub>2</sub> H + NO <sub>2</sub>                                               | k1_R02ISOPD02                | Rickard and Pascoe (2009)*                        |
| G46451  | TrGAroC  | BZEMUCCO2H + OH → C5DIALO2 + CO <sub>2</sub>                                                                | 4.06E-11                     | Rickard and Pascoe (2009)                         |
| G46452  | TrGAroCN | NNCATECOOH + OH → NNCATECO2                                                                                 | 0.6*k_CH300H_OH              | Rickard and Pascoe (2009)                         |
| G46453  | TrGAroCN | NPHEN1O + NO <sub>2</sub> → DNPHEN                                                                          | k_C6H50_N02                  | Rickard and Pascoe (2009), Platz<br>et al. (1998) |
| G46454  | TrGAroCN | NPHEN1O + O <sub>3</sub> → NPHEN1O2                                                                         | k_C6H50_03                   | Rickard and Pascoe (2009), Tao<br>and Li (1999)   |
| G46455  | TrGAroCN | DNPHEN + NO <sub>3</sub> → NDNPHENO2                                                                        | 2.25E-15                     | Rickard and Pascoe (2009)                         |
| G46456  | TrGAroCN | DNPHEN + OH → DNPHEO2                                                                                       | 3.00E-14                     | Rickard and Pascoe (2009)                         |
| G46457  | TrGAroCN | PHENOL + NO <sub>3</sub> → .742 C6H5O + .742 HNO <sub>3</sub> + .258<br>NPHENO2                             | 3.8E-12                      | Rickard and Pascoe (2009)*                        |

Table 1: Gas phase reactions (... continued)

| #       | labels   | reaction                                                                                                | rate coefficient             | reference                                       |
|---------|----------|---------------------------------------------------------------------------------------------------------|------------------------------|-------------------------------------------------|
| G46458  | TrGAroC  | PHENOL + OH → .06 C6H5O + .8 CATECHOL + .8 HO <sub>2</sub> + .14 PHENO2                                 | 4.7E-13*EXP(1220/TEMP)       | Rickard and Pascoe (2009)*                      |
| G46459  | TrGAroCN | PBZQONE + NO <sub>3</sub> → NBZQO2                                                                      | 3.00E-13                     | Rickard and Pascoe (2009)                       |
| G46460  | TrGAroC  | PBZQONE + OH → PBZQO2                                                                                   | 4.6E-12                      | Rickard and Pascoe (2009)                       |
| G46461a | TrGAroC  | PHENO2 + HO <sub>2</sub> → PHENOOH                                                                      | KR02H02(6)*(1-rchohch2o2_oh) | Rickard and Pascoe (2009)                       |
| G46461b | TrGAroC  | PHENO2 + HO <sub>2</sub> → .71 MALDALCO2H + .71 GLYOX + .29 PBZQONE + HO <sub>2</sub> + OH              | KR02H02(6)*rchohch2o2_oh     | Rickard and Pascoe (2009)*                      |
| G46462  | TrGAroCN | PHENO2 + NO → .71 MALDALCO2H + .71 GLYOX + .29 PBZQONE + HO <sub>2</sub> + NO <sub>2</sub>              | KR02N0                       | Rickard and Pascoe (2009)*                      |
| G46463  | TrGAroCN | PHENO2 + NO <sub>3</sub> → .71 MALDALCO2H + .71 GLYOX + .29 PBZQONE + HO <sub>2</sub> + NO <sub>2</sub> | KR02N03                      | Rickard and Pascoe (2009)*                      |
| G46464  | TrGAroC  | PHENO2 → .71 MALDALCO2H + .71 GLYOX + .29 PBZQONE + HO <sub>2</sub>                                     | k1_R02ISOPD02                | Rickard and Pascoe (2009)*                      |
| G46465  | TrGAroC  | C615CO2OOH + OH → C6125CO + OH                                                                          | 9.42E-11                     | Rickard and Pascoe (2009)                       |
| G46466a | TrGAroC  | C5CO2DBCO3 + HO <sub>2</sub> → C5CO2DCO3H                                                               | KAPH02*(rco3_ooH+rco3_o3)    | Rickard and Pascoe (2009)                       |
| G46466b | TrGAroC  | C5CO2DBCO3 + HO <sub>2</sub> → CH <sub>3</sub> C(O) + HCOCOCHO + CO <sub>2</sub> + OH                   | KAPH02*rco3_oh               | Rickard and Pascoe (2009)                       |
| G46467  | TrGAroCN | C5CO2DBCO3 + NO → CH <sub>3</sub> C(O) + HCOCOCHO + CO <sub>2</sub> + NO <sub>2</sub>                   | KAPNO                        | Rickard and Pascoe (2009)                       |
| G46468  | TrGAroCN | C5CO2DBCO3 + NO <sub>2</sub> → C5CO2DBPAN                                                               | k_CH3C03_N02                 | Rickard and Pascoe (2009)*                      |
| G46469  | TrGAroCN | C5CO2DBCO3 + NO <sub>3</sub> → CH <sub>3</sub> C(O) + HCOCOCHO + CO <sub>2</sub> + NO <sub>2</sub>      | KR02N03*1.74                 | Rickard and Pascoe (2009)                       |
| G46470  | TrGAroC  | C5CO2DBCO3 → CH <sub>3</sub> C(O) + HCOCOCHO + CO <sub>2</sub>                                          | k1_R02RC03                   | Rickard and Pascoe (2009)                       |
| G46471  | TrGAroCN | NPHEN1O2 + HO <sub>2</sub> → NPHEN1OOH                                                                  | KR02H02(6)                   | Rickard and Pascoe (2009)                       |
| G46472a | TrGAroCN | NPHEN1O2 + NO → NPHEN1O + NO <sub>2</sub>                                                               | KR02N0                       | Rickard and Pascoe (2009)                       |
| G46472b | TrGAroCN | NPHEN1O2 + NO <sub>2</sub> → NPHEN1O + NO <sub>3</sub>                                                  | k_C6H502_N02                 | Jagiella and Zabel (2007)*                      |
| G46473  | TrGAroCN | NPHEN1O2 + NO <sub>3</sub> → NPHEN1O + NO <sub>2</sub>                                                  | KR02N03                      | Rickard and Pascoe (2009)                       |
| G46474  | TrGAroCN | NPHEN1O2 → NPHEN1O                                                                                      | k1_R02sR02                   | Rickard and Pascoe (2009)                       |
| G46475  | TrGAroCN | NPHENOOH + OH → NPHENO2                                                                                 | 1.07E-10                     | Rickard and Pascoe (2009)                       |
| G46476  | TrGAroCN | C6H5O + NO <sub>2</sub> → HOC6H4NO2                                                                     | k_C6H50_N02                  | Rickard and Pascoe (2009), Platz et al. (1998)* |
| G46477  | TrGAroC  | C6H5O + O <sub>3</sub> → C6H5O2                                                                         | k_C6H50_03                   | Rickard and Pascoe (2009), Tao and Li (1999)    |
| G46478  | TrGAroCN | NCATECOOH + OH → NCATECO2                                                                               | 0.6*k_CH300H_OH              | Rickard and Pascoe (2009)                       |
| G46479  | TrGAroC  | PBZQOOH + OH → PBZQCO + OH                                                                              | 1.23E-10                     | Rickard and Pascoe (2009)                       |

Table 1: Gas phase reactions (... continued)

| #       | labels   | reaction                                                                                                                                                           | rate coefficient                                                              | reference                  |
|---------|----------|--------------------------------------------------------------------------------------------------------------------------------------------------------------------|-------------------------------------------------------------------------------|----------------------------|
| G46480a | TrGAroC  | $\text{PBZQO}_2 + \text{HO}_2 \rightarrow \text{PBZQOOH}$                                                                                                          | $\text{KRO2H02}(6) * (1 - \text{rchohch2o2\_oh} - \text{rcoch2o2\_oh})$       | Rickard and Pascoe (2009)  |
| G46480b | TrGAroC  | $\text{PBZQO}_2 + \text{HO}_2 \rightarrow \text{C5CO2OHCO}_3 + \text{OH}$                                                                                          | $\text{KRO2H02}(6) * (\text{rchohch2o2\_oh} + \text{rcoch2o2\_oh})$           | Rickard and Pascoe (2009)* |
| G46481  | TrGAroCN | $\text{PBZQO}_2 + \text{NO} \rightarrow \text{C5CO2OHCO}_3 + \text{NO}_2$                                                                                          | KRO2N0                                                                        | Rickard and Pascoe (2009)* |
| G46482  | TrGAroCN | $\text{PBZQO}_2 + \text{NO}_3 \rightarrow \text{C5CO2OHCO}_3 + \text{NO}_2$                                                                                        | KRO2N03                                                                       | Rickard and Pascoe (2009)* |
| G46483  | TrGAroC  | $\text{PBZQO}_2 \rightarrow \text{C5CO2OHCO}_3$                                                                                                                    | k1_R02s0R02                                                                   | Rickard and Pascoe (2009)* |
| G46484  | TrGAroC  | $\text{BZOBIPEROH} + \text{OH} \rightarrow \text{MALDIALCO}_3 + \text{GLYOX}$                                                                                      | 8.16E-11                                                                      | Rickard and Pascoe (2009)  |
| G46485a | TrGAroCN | $\text{DNPHENO}_2 + \text{HO}_2 \rightarrow \text{DNPHENO}_2\text{OH}$                                                                                             | $\text{KRO2H02}(6) * (1 - \text{rchohch2o2\_oh})$                             | Rickard and Pascoe (2009)  |
| G46485b | TrGAroCN | $\text{DNPHENO}_2 + \text{HO}_2 \rightarrow \text{NC4DCO}_2\text{H} + \text{HCOCO}_2\text{H} + \text{NO}_2 + \text{OH}$                                            | $\text{KRO2H02}(6) * \text{rchohch2o2\_oh}$                                   | Rickard and Pascoe (2009)* |
| G46486  | TrGAroCN | $\text{DNPHENO}_2 + \text{NO} \rightarrow \text{NC4DCO}_2\text{H} + \text{HCOCO}_2\text{H} + \text{NO}_2 + \text{NO}_2$                                            | KRO2N0                                                                        | Rickard and Pascoe (2009)* |
| G46487  | TrGAroCN | $\text{DNPHENO}_2 + \text{NO}_3 \rightarrow \text{NC4DCO}_2\text{H} + \text{HCOCO}_2\text{H} + \text{NO}_2 + \text{NO}_2$                                          | KRO2N03                                                                       | Rickard and Pascoe (2009)* |
| G46488  | TrGAroCN | $\text{DNPHENO}_2 \rightarrow \text{NC4DCO}_2\text{H} + \text{HCOCO}_2\text{H} + \text{NO}_2$                                                                      | k1_R02ISOPD02                                                                 | Rickard and Pascoe (2009)* |
| G46489  | TrGAroC  | $\text{BZBIPEROOH} + \text{OH} \rightarrow \text{BZOBIPEROH} + \text{OH}$                                                                                          | 9.77E-11                                                                      | Rickard and Pascoe (2009)  |
| G46490a | TrGAroC  | $\text{BZEMUCO}_2 + \text{HO}_2 \rightarrow \text{BZEMUCOOH}$                                                                                                      | KRO2H02(6)                                                                    | Rickard and Pascoe (2009)  |
| G46490b | TrGAroC  | $\text{BZEMUCO}_2 + \text{HO}_2 \rightarrow .5 \text{ EPXC4DIAL} + .5 \text{ GLYOX} + .5 \text{ HO}_2 + .5 \text{ C3DIALO}_2 + .5 \text{ C32OH13CO} + \text{OH}$   | KRO2H02(6)                                                                    | Rickard and Pascoe (2009)* |
| G46491a | TrGAroCN | $\text{BZEMUCO}_2 + \text{NO} \rightarrow \text{BZEMUCNO}_3$                                                                                                       | $\text{KRO2N0} * \alpha_{\text{AN}}(10, 2, 0, 1, 0, \text{temp, cair})$       | Rickard and Pascoe (2009)  |
| G46491b | TrGAroCN | $\text{BZEMUCO}_2 + \text{NO} \rightarrow .5 \text{ EPXC4DIAL} + .5 \text{ GLYOX} + .5 \text{ HO}_2 + .5 \text{ C3DIALO}_2 + .5 \text{ C32OH13CO} + \text{NO}_2$   | $\text{KRO2N0} * (1 - \alpha_{\text{AN}}(10, 2, 0, 1, 0, \text{temp, cair}))$ | Rickard and Pascoe (2009)* |
| G46492  | TrGAroCN | $\text{BZEMUCO}_2 + \text{NO}_3 \rightarrow .5 \text{ EPXC4DIAL} + .5 \text{ GLYOX} + .5 \text{ HO}_2 + .5 \text{ C3DIALO}_2 + .5 \text{ C32OH13CO} + \text{NO}_2$ | KRO2N03                                                                       | Rickard and Pascoe (2009)* |
| G46493  | TrGAroC  | $\text{BZEMUCO}_2 \rightarrow .5 \text{ EPXC4DIAL} + .5 \text{ GLYOX} + .5 \text{ HO}_2 + .5 \text{ C3DIALO}_2 + .5 \text{ C32OH13CO}$                             | k1_R02s0R02                                                                   | Rickard and Pascoe (2009)* |
| G46494  | TrGAroCN | $\text{C5CO2DBPAN} + \text{OH} \rightarrow \text{HCOCOCHO} + \text{CH}_3\text{CHO} + \text{CO}_2 + \text{NO}_2$                                                    | 3.28E-11                                                                      | Rickard and Pascoe (2009)  |
| G46495  | TrGAroCN | $\text{C5CO2DBPAN} \rightarrow \text{C5CO2DBCO}_3 + \text{NO}_2$                                                                                                   | k_PAN_M                                                                       | Rickard and Pascoe (2009)  |
| G46496  | TrGAroCN | $\text{NBZQOOH} + \text{OH} \rightarrow \text{NBZQO}_2$                                                                                                            | 6.68E-11                                                                      | Rickard and Pascoe (2009)  |
| G46497  | TrGAroC  | $\text{CATEC1OOH} + \text{OH} \rightarrow \text{CATEC1O}_2$                                                                                                        | .6*k_CH300H_OH                                                                | Rickard and Pascoe (2009)  |
| G46498  | TrGAroC  | $\text{C6125CO} + \text{OH} \rightarrow \text{C5CO14O}_2 + \text{CO}$                                                                                              | 6.45E-11                                                                      | Rickard and Pascoe (2009)  |
| G46499a | TrGAroCN | $\text{NBZQO}_2 + \text{HO}_2 \rightarrow \text{NBZQOOH}$                                                                                                          | $\text{KRO2H02}(6) * (1 - \text{rcoch2o2\_oh})$                               | Rickard and Pascoe (2009)  |

Table 1: Gas phase reactions (... continued)

| #       | labels   | reaction                                                         | rate coefficient                              | reference                                               |
|---------|----------|------------------------------------------------------------------|-----------------------------------------------|---------------------------------------------------------|
| G46499b | TrGAroCN | NBZQO2 + HO2 → C6CO4DB + NO2 + OH                                | KR02H02(6)*rcoch2o2_oh                        | Rickard and Pascoe (2009)*                              |
| G46500  | TrGAroCN | NBZQO2 + NO → C6CO4DB + NO2 + NO2                                | KR02NO                                        | Rickard and Pascoe (2009)*                              |
| G46501  | TrGAroCN | NBZQO2 + NO3 → C6CO4DB + NO2 + NO2                               | KR02NO3                                       | Rickard and Pascoe (2009)*                              |
| G46502  | TrGAroCN | NBZQO2 → C6CO4DB + NO2                                           | k1_R02s0R02                                   | Rickard and Pascoe (2009)*                              |
| G46503  | TrGAroCN | DNPHENO0H + OH → DNPHENO2                                        | 0.6*k_CH300H_OH                               | Rickard and Pascoe (2009)                               |
| G46504  | TrGAroC  | CATEC1O2 + HO2 → CATEC1OOH                                       | KR02H02(6)                                    | Rickard and Pascoe (2009)                               |
| G46505a | TrGAroCN | CATEC1O2 + NO → CATEC1O + NO2                                    | KR02NO                                        | Rickard and Pascoe (2009)                               |
| G46505b | TrGAroCN | CATEC1O2 + NO2 → CATEC1O + NO3                                   | K_C6H502_NO2                                  | Jagiella and Zabel (2007)*                              |
| G46506  | TrGAroCN | CATEC1O2 + NO3 → CATEC1O + NO2                                   | KR02NO3                                       | Rickard and Pascoe (2009)                               |
| G46507  | TrGAroC  | CATEC1O2 → CATEC1O                                               | k1_R02s0R02                                   | Rickard and Pascoe (2009)                               |
| G46508  | TrGAroC  | BZEMUCCO3H + OH → BZEMUCCO3                                      | 4.37E-11                                      | Rickard and Pascoe (2009)                               |
| G46509  | TrGAroC  | C6H5OOH + OH → C6H5O2                                            | 3.60E-12                                      | Rickard and Pascoe (2009)                               |
| G46510  | TrGAroC  | BZEMUCOOH + OH → BZEMUCCO + OH                                   | 1.31E-10                                      | Rickard and Pascoe (2009)                               |
| G46511a | TrGAroC  | BZEMUCCO3 + HO2 → BZEMUCCO2H + O3                                | KAPH02*rco3_o3                                | Rickard and Pascoe (2009)                               |
| G46511b | TrGAroC  | BZEMUCCO3 + HO2 → BZEMUCCO3H                                     | KAPH02*rco3_ooh                               | Rickard and Pascoe (2009)                               |
| G46511c | TrGAroC  | BZEMUCCO3 + HO2 → C5DIALO2 + CO2 + OH                            | KAPH02*rco3_oh                                | Rickard and Pascoe (2009)                               |
| G46512  | TrGAroCN | BZEMUCCO3 + NO → C5DIALO2 + CO2 + NO2                            | KAPNO                                         | Rickard and Pascoe (2009)                               |
| G46513  | TrGAroCN | BZEMUCCO3 + NO2 → BZEMUCPAN                                      | k_CH3C03_NO2                                  | Rickard and Pascoe (2009)                               |
| G46514  | TrGAroCN | BZEMUCCO3 + NO3 → C5DIALO2 + CO2 + NO2                           | KR02NO3*1.74                                  | Rickard and Pascoe (2009)                               |
| G46515  | TrGAroC  | BZEMUCCO3 → C5DIALO2 + CO2                                       | k1_R02RC03                                    | Rickard and Pascoe (2009)*                              |
| G46516  | TrGAroC  | C6H5O2 + HO2 → C6H5OOH                                           | KR02H02(6)                                    | Rickard and Pascoe (2009)                               |
| G46517a | TrGAroCN | C6H5O2 + NO → C6H5O + NO2                                        | KR02NO                                        | Rickard and Pascoe (2009)                               |
| G46517b | TrGAroCN | C6H5O2 + NO2 → C6H5O + NO3                                       | K_C6H502_NO2                                  | Jagiella and Zabel (2007)*                              |
| G46518  | TrGAroCN | C6H5O2 + NO3 → C6H5O + NO2                                       | KR02NO3                                       | Rickard and Pascoe (2009)                               |
| G46519  | TrGAroC  | C6H5O2 → C6H5O                                                   | k1_R02sR02                                    | Rickard and Pascoe (2009)                               |
| G46521  | TrGAroCN | BZEMUCNO3 + OH → BZEMUCCO + NO2                                  | 4.38E-11                                      | Rickard and Pascoe (2009)                               |
| G46522a | TrGAroC  | BZBIPERO2 + HO2 → BZBIPEROOH                                     | KR02H02(6)*(1.-rbipero2_oh)                   | Rickard and Pascoe (2009)                               |
| G46522b | TrGAroC  | BZBIPERO2 + HO2 → OH + GLYOX + HO2 + .5<br>BZFUONE + .5 BZFUONE  | KR02H02(6)*rbipero2_oh                        | Rickard and Pascoe (2009), Bird-<br>sall et al. (2010)* |
| G46523a | TrGAroCN | BZBIPERO2 + NO → BZBIPERNO3                                      | KR02NO*alpha_AN(9,2,0,0,1,temp,<br>cair)      | Rickard and Pascoe (2009)                               |
| G46523b | TrGAroCN | BZBIPERO2 + NO → NO2 + GLYOX + HO2 + .5<br>BZFUONE + .5 BZFUONE  | KR02NO*(1.-alpha_AN(9,2,0,0,1,<br>temp,cair)) | Rickard and Pascoe (2009)*                              |
| G46524  | TrGAroCN | BZBIPERO2 + NO3 → NO2 + GLYOX + HO2 + .5<br>BZFUONE + .5 BZFUONE | KR02NO3                                       | Rickard and Pascoe (2009)*                              |

Table 1: Gas phase reactions (... continued)

| #       | labels   | reaction                                                                                                                    | rate coefficient          | reference                                         |
|---------|----------|-----------------------------------------------------------------------------------------------------------------------------|---------------------------|---------------------------------------------------|
| G46525  | TrGAroC  | BZBIPERO2 → GLYOX + HO <sub>2</sub> + BZFUONE                                                                               | k1_R02s0R02               | Rickard and Pascoe (2009)*                        |
| G47200  | TrGTerCN | CO235C6CHO + NO <sub>3</sub> → CO235C6CO3 + HNO <sub>3</sub>                                                                | KN03AL*5.5                | Rickard and Pascoe (2009)                         |
| G47201  | TrGTerC  | CO235C6CHO + OH → CO235C6CO3                                                                                                | 6.70E-11                  | Rickard and Pascoe (2009)                         |
| G47202a | TrGTerC  | CO235C6CO3 + HO <sub>2</sub> → C235C6CO3H                                                                                   | KAPH02*(rco3_ooh+rco3_o3) | Rickard and Pascoe (2009)                         |
| G47202b | TrGTerC  | CO235C6CO3 + HO <sub>2</sub> → CO235C6O2 + CO <sub>2</sub> + OH                                                             | KAPH02*rco3_oh            | Rickard and Pascoe (2009)                         |
| G47203  | TrGTerCN | CO235C6CO3 + NO → CO235C6O2 + CO <sub>2</sub> + NO <sub>2</sub>                                                             | KAPNO                     | Rickard and Pascoe (2009)                         |
| G47204  | TrGTerCN | CO235C6CO3 + NO <sub>2</sub> → C7PAN3                                                                                       | k_CH3CO3_NO2              | Rickard and Pascoe (2009)                         |
| G47205  | TrGTerC  | CO235C6CO3 → CO235C6O2 + CO <sub>2</sub>                                                                                    | k1_R02RCO3                | Rickard and Pascoe (2009)                         |
| G47206  | TrGTerC  | C235C6CO3H + OH → CO235C6CO3                                                                                                | 4.75E-12                  | Rickard and Pascoe (2009)                         |
| G47207  | TrGTerCN | C7PAN3 + OH → CO235C5CHO + CO + NO <sub>2</sub>                                                                             | 8.83E-13                  | Rickard and Pascoe (2009)                         |
| G47208  | TrGTerCN | C7PAN3 → CO235C6CO3 + NO <sub>2</sub>                                                                                       | k_PAN_M                   | Rickard and Pascoe (2009)                         |
| G47209a | TrGTerC  | C716O2 + HO <sub>2</sub> → C716OOH                                                                                          | KR02H02(7)*rcoch2o2_ooh   | Rickard and Pascoe (2009),<br>Taraborrelli (2016) |
| G47209b | TrGTerC  | C716O2 + HO <sub>2</sub> → CO13C4CHO + CH <sub>3</sub> C(O) + OH                                                            | KR02H02(7)*rcoch2o2_oh    | Rickard and Pascoe (2009),<br>Taraborrelli (2016) |
| G47210  | TrGTerCN | C716O2 + NO → CO13C4CHO + CH <sub>3</sub> C(O) + NO <sub>2</sub>                                                            | KR02NO                    | Rickard and Pascoe (2009)*                        |
| G47211  | TrGTerC  | C716O2 → CO13C4CHO + CH <sub>3</sub> C(O)                                                                                   | k1_R02s0R02               | Rickard and Pascoe (2009)                         |
| G47212  | TrGTerC  | C716OOH + OH → CO235C6CHO + OH                                                                                              | 1.20E-10                  | Rickard and Pascoe (2009)                         |
| G47213  | TrGTerC  | C721O2 + HO <sub>2</sub> → C721OOH                                                                                          | KR02H02(7)                | Rickard and Pascoe (2009)                         |
| G47214  | TrGTerCN | C721O2 + NO → C722O2 + NO <sub>2</sub>                                                                                      | KR02NO                    | Rickard and Pascoe (2009)*                        |
| G47215  | TrGTerC  | C721O2 → C722O2                                                                                                             | k1_R02pR02                | Rickard and Pascoe (2009)                         |
| G47216  | TrGTerC  | C721OOH + OH → C721O2                                                                                                       | 1.27E-11                  | Rickard and Pascoe (2009)                         |
| G47217  | TrGTerC  | C722O2 + HO <sub>2</sub> → C722OOH                                                                                          | KR02H02(7)                | Rickard and Pascoe (2009)                         |
| G47218  | TrGTerCN | C722O2 + NO → CH <sub>3</sub> COCH <sub>3</sub> + C44O2 + NO <sub>2</sub>                                                   | KR02NO                    | Rickard and Pascoe (2009)*                        |
| G47219  | TrGTerC  | C722O2 → CH <sub>3</sub> COCH <sub>3</sub> + C44O2                                                                          | k1_R02tR02                | Rickard and Pascoe (2009)                         |
| G47220  | TrGTerC  | C722OOH + OH → C722O2                                                                                                       | 3.31E-11                  | Rickard and Pascoe (2009)                         |
| G47221  | TrGTerC  | ROO6R3O2 → ROO6R5O2                                                                                                         | 5.68E10*EXP(-8745./TEMP)  | Vereecken and Peeters (2012)                      |
| G47222  | TrGTerCN | ROO6R3O2 + NO → ROO6R3O + NO <sub>2</sub>                                                                                   | KR02NO                    | Vereecken and Peeters (2012)*                     |
| G47223  | TrGTerC  | ROO6R3O2 + HO <sub>2</sub> → 7 LCARBON                                                                                      | KR02H02(7)                | Vereecken and Peeters (2012)*                     |
| G47224  | TrGTerC  | ROO6R3O2 → ROO6R3O                                                                                                          | k1_R02sR02                | Vereecken and Peeters (2012)                      |
| G47225  | TrGTerC  | ROO6R3O → 7 LCARBON + HO <sub>2</sub>                                                                                       | 5.7E10*EXP(-2949./TEMP)   | Vereecken and Peeters (2012)*                     |
| G47226  | TrGTerC  | ROO6R5O2 → 7 LCARBON + OH                                                                                                   | 9.17E10*EXP(-8706./TEMP)  | Vereecken and Peeters (2012)*                     |
| G47400  | TrGAroC  | TOLUENE + OH → .07 C6H5CH2O2 + .18 CRESOL +<br>.18 HO <sub>2</sub> + .65 TLBIPERO2 + .10 TLEPOXMUC + .10<br>HO <sub>2</sub> | 1.8E-12*EXP(340/TEMP)     | Rickard and Pascoe (2009)*                        |

Table 1: Gas phase reactions (... continued)

| #       | labels   | reaction                                                                                                                                                          | rate coefficient                               | reference                                           |
|---------|----------|-------------------------------------------------------------------------------------------------------------------------------------------------------------------|------------------------------------------------|-----------------------------------------------------|
| G47401  | TrGAroC  | $C_6H_5CH_2O_2 + HO_2 \rightarrow C_6H_5CH_2OOH$                                                                                                                  | $1.5E-13*EXP(1310/TEMP)$                       | Rickard and Pascoe (2009)                           |
| G47402a | TrGAroCN | $C_6H_5CH_2O_2 + NO \rightarrow C_6H_5CH_2NO_3$                                                                                                                   | $KR02N0*\alpha\_AN(7,1,0,0,0,temp,cair)$       | Rickard and Pascoe (2009)*                          |
| G47402b | TrGAroCN | $C_6H_5CH_2O_2 + NO \rightarrow BENZAL + HO_2 + NO_2$                                                                                                             | $KR02N0*(1.-\alpha\_AN(7,1,0,0,0,temp,cair))$  | Rickard and Pascoe (2009)*                          |
| G47403  | TrGAroCN | $C_6H_5CH_2O_2 + NO_3 \rightarrow BENZAL + HO_2 + NO_2$                                                                                                           | KR02N03                                        | Rickard and Pascoe (2009)*                          |
| G47404  | TrGAroC  | $C_6H_5CH_2O_2 \rightarrow BENZAL + HO_2$                                                                                                                         | $2*(k\_CH302*2.4E-14*EXP(1620./TEMP))*0.5*RO2$ | Rickard and Pascoe (2009)*                          |
| G47405  | TrGAroCN | $CRESOL + NO_3 \rightarrow .103 CRESO_2 + .103 HNO_3 + .506 NCRESO_2 + .391 TOL1O + .391 HNO_3$                                                                   | $1.4E-11$                                      | Rickard and Pascoe (2009)*                          |
| G47406  | TrGAroC  | $CRESOL + OH \rightarrow .2 CRESO_2 + .727 MCATECHOL + .727 HO_2 + .073 TOL1O$                                                                                    | $4.65E-11$                                     | Rickard and Pascoe (2009)*                          |
| G47407a | TrGAroC  | $TLBIPERO_2 + HO_2 \rightarrow TLBIPEROOH$                                                                                                                        | $KR02H02(7)*(1.-rbipero2\_oh)$                 | Rickard and Pascoe (2009)                           |
| G47407b | TrGAroC  | $TLBIPERO_2 + HO_2 \rightarrow OH + .6 GLYOX + .4 MGLYOX + HO_2 + .2 ZCODC23DBCOD + .2 C5DICARB + .2 TLFUONE + .2 BZFUONE + .2 MALDIAL$                           | $KR02H02(7)*rbipero2\_oh$                      | Rickard and Pascoe (2009), Bird-sall et al. (2010)* |
| G47408a | TrGAroCN | $TLBIPERO_2 + NO \rightarrow NO_2 + .6 GLYOX + .4 MGLYOX + HO_2 + .2 ZCODC23DBCOD + .2 C5DICARB + .2 TLFUONE + .2 BZFUONE + .2 MALDIAL$                           | $KR02N0*(1.-\alpha\_AN(11,2,0,0,1,temp,cair))$ | Rickard and Pascoe (2009)*                          |
| G47408b | TrGAroCN | $TLBIPERO_2 + NO \rightarrow TLBIPERNO_3$                                                                                                                         | $KR02N0*\alpha\_AN(11,2,0,0,1,temp,cair)$      | Rickard and Pascoe (2009)*                          |
| G47409  | TrGAroCN | $TLBIPERO_2 + NO_3 \rightarrow NO_2 + .6 GLYOX + .4 MGLYOX + HO_2 + .2 ZCODC23DBCOD + .2 C5DICARB + .2 TLFUONE + .2 BZFUONE + .2 MALDIAL$                         | KR02N03                                        | Rickard and Pascoe (2009)*                          |
| G47410  | TrGAroC  | $TLBIPERO_2 \rightarrow .6 GLYOX + .4 MGLYOX + HO_2 + .2 ZCODC23DBCOD + .2 C5DICARB + .2 TLFUONE + .2 BZFUONE + .2 MALDIAL$                                       | $k1\_R02s0R02$                                 | Rickard and Pascoe (2009)*                          |
| G47411  | TrGAroCN | $TLEPOXMUC + NO_3 \rightarrow TLEMUCCO_3 + HNO_3$                                                                                                                 | $KN03AL*2.75$                                  | Rickard and Pascoe (2009)                           |
| G47412  | TrGAroC  | $TLEPOXMUC + O_3 \rightarrow EPXC4DIAL + .125 CH_3CHO + .695 CH_3C(O) + .57 CO + .57 OH + .125 HO_2 + .1125 CH_3COCO_2H + .0675 MGLYOX + .0675 H_2O_2 + .25 CO_2$ | $5.00E-18$                                     | Rickard and Pascoe (2009)*                          |
| G47413  | TrGAroC  | $TLEPOXMUC + OH \rightarrow .31 TLEMUCCO_3 + .69 TLEMUCO_2$                                                                                                       | $7.99E-11$                                     | Rickard and Pascoe (2009)*                          |
| G47414  | TrGAroC  | $C_6H_5CH_2OOH + OH \rightarrow BENZAL + OH$                                                                                                                      | $2.05E-11$                                     | Rickard and Pascoe (2009)                           |
| G47415  | TrGAroCN | $C_6H_5CH_2NO_3 + OH \rightarrow BENZAL + NO_2$                                                                                                                   | $6.03E-12$                                     | Rickard and Pascoe (2009)                           |

Table 1: Gas phase reactions (... continued)

| #       | labels   | reaction                                                                                                                                       | rate coefficient             | reference                                          |
|---------|----------|------------------------------------------------------------------------------------------------------------------------------------------------|------------------------------|----------------------------------------------------|
| G47416  | TrGAroCN | BENZAL + NO <sub>3</sub> → C <sub>6</sub> H <sub>5</sub> CO <sub>3</sub> + HNO <sub>3</sub>                                                    | 2.40E-15                     | Rickard and Pascoe (2009)                          |
| G47417  | TrGAroC  | BENZAL + OH → C <sub>6</sub> H <sub>5</sub> CO <sub>3</sub>                                                                                    | 5.9E-12*EXP(225/TEMP)        | Rickard and Pascoe (2009)                          |
| G47418a | TrGAroC  | CRESO <sub>2</sub> + HO <sub>2</sub> → CRESOOH                                                                                                 | KR02H02(7)*(1-rchohch2o2_oh) | Rickard and Pascoe (2009)                          |
| G47418b | TrGAroC  | CRESO <sub>2</sub> + HO <sub>2</sub> → .68 C <sub>5</sub> CO <sub>14</sub> OH + .68 GLYOX + HO <sub>2</sub><br>+ .32 PTLQONE + OH              | KR02H02(7)*rchohch2o2_oh     | Rickard and Pascoe (2009)*                         |
| G47419  | TrGAroCN | CRESO <sub>2</sub> + NO → .68 C <sub>5</sub> CO <sub>14</sub> OH + .68 GLYOX + HO <sub>2</sub><br>+ .32 PTLQONE + NO <sub>2</sub>              | KR02N0                       | Rickard and Pascoe (2009)*                         |
| G47420  | TrGAroCN | CRESO <sub>2</sub> + NO <sub>3</sub> → .68 C <sub>5</sub> CO <sub>14</sub> OH + .68 GLYOX + HO <sub>2</sub><br>+ .32 PTLQONE + NO <sub>2</sub> | KR02N03                      | Rickard and Pascoe (2009)*                         |
| G47421  | TrGAroC  | CRESO <sub>2</sub> → .68 C <sub>5</sub> CO <sub>14</sub> OH + .68 GLYOX + HO <sub>2</sub> + .32<br>PTLQONE                                     | k1_R02ISOPD02                | Rickard and Pascoe (2009)*                         |
| G47422a | TrGAroCN | NCRESO <sub>2</sub> + HO <sub>2</sub> → NCRESOOH                                                                                               | KR02H02(7)*(1-rchohch2o2_oh) | Rickard and Pascoe (2009)                          |
| G47422b | TrGAroCN | NCRESO <sub>2</sub> + HO <sub>2</sub> → C <sub>5</sub> CO <sub>14</sub> OH + GLYOX + NO <sub>2</sub> +<br>OH                                   | KR02H02(7)*rchohch2o2_oh     | Rickard and Pascoe (2009)*                         |
| G47423  | TrGAroCN | NCRESO <sub>2</sub> + NO → C <sub>5</sub> CO <sub>14</sub> OH + GLYOX + NO <sub>2</sub> + NO <sub>2</sub>                                      | KR02N0                       | Rickard and Pascoe (2009)*                         |
| G47424  | TrGAroCN | NCRESO <sub>2</sub> + NO <sub>3</sub> → C <sub>5</sub> CO <sub>14</sub> OH + GLYOX + NO <sub>2</sub> +<br>NO <sub>2</sub>                      | KR02N03                      | Rickard and Pascoe (2009)*                         |
| G47425  | TrGAroCN | NCRESO <sub>2</sub> → C <sub>5</sub> CO <sub>14</sub> OH + GLYOX + NO <sub>2</sub>                                                             | k1_R02ISOPD02                | Rickard and Pascoe (2009)*                         |
| G47426  | TrGAroCN | TOLIO + NO <sub>2</sub> → TOLIOHNO <sub>2</sub>                                                                                                | k_C6H50_N02                  | Rickard and Pascoe (2009), Platz<br>et al. (1998)* |
| G47427  | TrGAroC  | TOLIO + O <sub>3</sub> → OXYL1O2                                                                                                               | k_C6H50_O3                   | Rickard and Pascoe (2009), Tao<br>and Li (1999)    |
| G47428  | TrGAroCN | MCATECHOL + NO <sub>3</sub> → MCATEC1O + HNO <sub>3</sub>                                                                                      | 1.7E-10*1.0                  | Rickard and Pascoe (2009)                          |
| G47429  | TrGAroC  | MCATECHOL + O <sub>3</sub> → MC3ODBCO <sub>2</sub> H + HCOCO <sub>2</sub> H +<br>HO <sub>2</sub> + OH                                          | 2.8E-17                      | Rickard and Pascoe (2009)*                         |
| G47430  | TrGAroC  | MCATECHOL + OH → MCATEC1O                                                                                                                      | 2.0E-10*1.0                  | Rickard and Pascoe (2009)                          |
| G47431  | TrGAroC  | TLBIPEROOH + OH → TLOBIPEROH + OH                                                                                                              | 9.64E-11                     | Rickard and Pascoe (2009)                          |
| G47432  | TrGAroCN | TLBIPERNO <sub>3</sub> + OH → TLOBIPEROH + NO <sub>2</sub>                                                                                     | 7.16E-11                     | Rickard and Pascoe (2009)                          |
| G47433  | TrGAroC  | TLOBIPEROH + OH → C <sub>5</sub> CO <sub>14</sub> O <sub>2</sub> + GLYOX                                                                       | 7.99E-11                     | Rickard and Pascoe (2009)                          |
| G47434a | TrGAroC  | TLEMUCCO <sub>3</sub> + HO <sub>2</sub> → C <sub>6</sub> 15CO <sub>2</sub> O <sub>2</sub> + CO <sub>2</sub> + OH                               | KAPH02*rco3_oh               | Rickard and Pascoe (2009)                          |
| G47434b | TrGAroC  | TLEMUCCO <sub>3</sub> + HO <sub>2</sub> → TLEMUCCO <sub>2</sub> H + O <sub>3</sub>                                                             | KAPH02*rco3_o3               | Rickard and Pascoe (2009)                          |
| G47434c | TrGAroC  | TLEMUCCO <sub>3</sub> + HO <sub>2</sub> → TLEMUCCO <sub>3</sub> H                                                                              | KAPH02*rco3_ooh              | Rickard and Pascoe (2009)                          |
| G47435  | TrGAroCN | TLEMUCCO <sub>3</sub> + NO → C <sub>6</sub> 15CO <sub>2</sub> O <sub>2</sub> + CO <sub>2</sub> + NO <sub>2</sub>                               | KAPNO                        | Rickard and Pascoe (2009)                          |
| G47436  | TrGAroCN | TLEMUCCO <sub>3</sub> + NO <sub>2</sub> → TLEMUCPAN                                                                                            | k_CH3C03_N02                 | Rickard and Pascoe (2009)*                         |
| G47437  | TrGAroCN | TLEMUCCO <sub>3</sub> + NO <sub>3</sub> → C <sub>6</sub> 15CO <sub>2</sub> O <sub>2</sub> + CO <sub>2</sub> + NO <sub>2</sub>                  | KR02N03*1.74                 | Rickard and Pascoe (2009)                          |

Table 1: Gas phase reactions (... continued)

| #       | labels   | reaction                                                                                                                 | rate coefficient                           | reference                                      |
|---------|----------|--------------------------------------------------------------------------------------------------------------------------|--------------------------------------------|------------------------------------------------|
| G47438  | TrGAroC  | TLEMUCCO3 → C615CO2O2 + CO <sub>2</sub>                                                                                  | k1_R02RCO3                                 | Rickard and Pascoe (2009)*                     |
| G47439a | TrGAroC  | TLEMUCO2 + HO <sub>2</sub> → TLEMUCOOH                                                                                   | KR02H02(7)*(1-rchohch2o2_oh-rcoch2o2_oh)   | Rickard and Pascoe (2009)                      |
| G47439b | TrGAroC  | TLEMUCO2 + HO <sub>2</sub> → .5 C3DIALO2 + .5 CO2H3CHO + .5 EPXC4DIAL + .5 MGLYOX + .5 HO <sub>2</sub> + OH              | KR02H02(7)*(rchohch2o2_oh+rcoch2o2_oh)     | Rickard and Pascoe (2009)*                     |
| G47440a | TrGAroCN | TLEMUCO2 + NO → TLEMUCNO3                                                                                                | KR02N0*alpha_AN(11,2,1,0,0,temp,cair)      | Rickard and Pascoe (2009)                      |
| G47440b | TrGAroCN | TLEMUCO2 + NO → .5 C3DIALO2 + .5 CO2H3CHO + .5 EPXC4DIAL + .5 MGLYOX + .5 HO <sub>2</sub> + NO <sub>2</sub>              | KR02N0*(1.-alpha_AN(11,2,1,0,0,temp,cair)) | Rickard and Pascoe (2009)*                     |
| G47441  | TrGAroCN | TLEMUCO2 + NO <sub>3</sub> → .5 C3DIALO2 + .5 CO2H3CHO + .5 EPXC4DIAL + .5 MGLYOX + .5 HO <sub>2</sub> + NO <sub>2</sub> | KR02N03                                    | Rickard and Pascoe (2009)*                     |
| G47442  | TrGAroC  | TLEMUCO2 → .5 C3DIALO2 + .5 CO2H3CHO + .5 EPXC4DIAL + .5 MGLYOX + .5 HO <sub>2</sub>                                     | k1_R02sOR02                                | Rickard and Pascoe (2009)*                     |
| G47443a | TrGAroC  | C6H5CO3 + HO <sub>2</sub> → C6H5CO3H                                                                                     | 1.1E-11*EXP(364./temp)*0.65                | Roth et al. (2010)                             |
| G47443b | TrGAroC  | C6H5CO3 + HO <sub>2</sub> → C6H5O2 + CO <sub>2</sub> + OH                                                                | 1.1E-11*EXP(364./temp)*0.20                | Roth et al. (2010)                             |
| G47443c | TrGAroC  | C6H5CO3 + HO <sub>2</sub> → PHCOOH + O <sub>3</sub>                                                                      | 1.1E-11*EXP(364./temp)*0.15                | Roth et al. (2010)                             |
| G47444  | TrGAroCN | C6H5CO3 + NO → C6H5O2 + CO <sub>2</sub> + NO <sub>2</sub>                                                                | KAPNO                                      | Rickard and Pascoe (2009)                      |
| G47445  | TrGAroCN | C6H5CO3 + NO <sub>2</sub> → PBZN                                                                                         | k_CH3CO3_NO2                               | Rickard and Pascoe (2009)*                     |
| G47446  | TrGAroCN | C6H5CO3 + NO <sub>3</sub> → C6H5O2 + CO <sub>2</sub> + NO <sub>2</sub>                                                   | KR02N03*1.74                               | Rickard and Pascoe (2009)                      |
| G47447  | TrGAroC  | C6H5CO3 → C6H5O2 + CO <sub>2</sub>                                                                                       | k1_R02RCO3                                 | Rickard and Pascoe (2009)*                     |
| G47448  | TrGAroC  | CRESOOH + OH → CRESO2                                                                                                    | 1.15E-10                                   | Rickard and Pascoe (2009)                      |
| G47449  | TrGAroCN | NCRESOOH + OH → NCRESO2                                                                                                  | 1.07E-10                                   | Rickard and Pascoe (2009)                      |
| G47450  | TrGAroCN | TOL1OHNO2 + NO <sub>3</sub> → NCRES1O + HNO <sub>3</sub>                                                                 | 3.13E-13*1.0                               | Rickard and Pascoe (2009)                      |
| G47451  | TrGAroCN | TOL1OHNO2 + OH → NCRES1O                                                                                                 | 2.8E-12                                    | Rickard and Pascoe (2009)                      |
| G47452  | TrGAroC  | OXYL1O2 + HO <sub>2</sub> → OXYL1OOH                                                                                     | KR02H02(7)                                 | Rickard and Pascoe (2009)                      |
| G47453  | TrGAroCN | OXYL1O2 + NO → TOL1O + NO <sub>2</sub>                                                                                   | KR02N0                                     | Rickard and Pascoe (2009)                      |
| G47454  | TrGAroCN | OXYL1O2 + NO <sub>2</sub> → TOL1O + NO <sub>3</sub>                                                                      | K_C6H5O2_NO2                               | Jagiella and Zabel (2007)*                     |
| G47455  | TrGAroCN | OXYL1O2 + NO <sub>3</sub> → TOL1O + NO <sub>2</sub>                                                                      | KR02N03                                    | Rickard and Pascoe (2009)                      |
| G47456  | TrGAroC  | OXYL1O2 → TOL1O                                                                                                          | k1_R02sR02                                 | Rickard and Pascoe (2009)                      |
| G47457  | TrGAroCN | MCATEC1O + NO <sub>2</sub> → MNCATECH                                                                                    | k_C6H50_NO2                                | Rickard and Pascoe (2009), Platz et al. (1998) |
| G47458  | TrGAroC  | MCATEC1O + O <sub>3</sub> → MCATEC1O2                                                                                    | k_C6H50_03                                 | Rickard and Pascoe (2009), Tao and Li (1999)   |
| G47459  | TrGAroC  | TLEMUCCO2H + OH → C615CO2O2 + CO <sub>2</sub>                                                                            | 5.98E-11                                   | Rickard and Pascoe (2009)                      |
| G47460  | TrGAroC  | TLEMUCCO3H + OH → TLEMUCCO3                                                                                              | 6.29E-11                                   | Rickard and Pascoe (2009)                      |



Table 1: Gas phase reactions (... continued)

| #       | labels   | reaction                                                                | rate coefficient                         | reference                                      |
|---------|----------|-------------------------------------------------------------------------|------------------------------------------|------------------------------------------------|
| G47461  | TrGAroCN | TLEMUCPAN + OH → C5DICARB + CO + CO <sub>2</sub> + NO <sub>2</sub>      | 5.96E-11                                 | Rickard and Pascoe (2009)                      |
| G47462  | TrGAroCN | TLEMUCPAN → TLEMUCCO3 + NO <sub>2</sub>                                 | k_PAN_M                                  | Rickard and Pascoe (2009)                      |
| G47463  | TrGAroC  | TLEMUCOOH + OH → TLEMUCCO + OH                                          | 7.04E-11                                 | Rickard and Pascoe (2009)                      |
| G47464  | TrGAroCN | TLEMUCNO3 + OH → TLEMUCCO + NO <sub>2</sub>                             | 3.06E-11                                 | Rickard and Pascoe (2009)                      |
| G47465  | TrGAroC  | TLEMUCCO + OH → CH <sub>3</sub> C(O) + EPXC4DIAL + CO                   | 4.06E-11                                 | Rickard and Pascoe (2009)                      |
| G47466  | TrGAroC  | C6H5CO3H + OH → C6H5CO3                                                 | 4.66E-12                                 | Rickard and Pascoe (2009)                      |
| G47467  | TrGAroC  | PHCOOH + OH → C6H5O2 + CO <sub>2</sub>                                  | 1.10E-12                                 | Rickard and Pascoe (2009)                      |
| G47468  | TrGAroCN | PBZN + OH → C6H5OOH + CO + NO <sub>2</sub>                              | 1.06E-12                                 | Rickard and Pascoe (2009)                      |
| G47469  | TrGAroCN | PBZN → C6H5CO3 + NO <sub>2</sub>                                        | k_PAN_M*0.67                             | Rickard and Pascoe (2009)                      |
| G47470  | TrGAroCN | PTLQONE + NO <sub>3</sub> → NPTLQO2                                     | 1.00E-12                                 | Rickard and Pascoe (2009)                      |
| G47471  | TrGAroC  | PTLQONE + OH → PTLQO2                                                   | 2.3E-11                                  | Rickard and Pascoe (2009)                      |
| G47472  | TrGAroCN | NCRES1O + NO <sub>2</sub> → DNCRES                                      | k_C6H5O_N02                              | Rickard and Pascoe (2009), Platz et al. (1998) |
| G47473  | TrGAroCN | NCRES1O + O <sub>3</sub> → NCRES1O2                                     | k_C6H5O_03                               | Rickard and Pascoe (2009), Tao and Li (1999)   |
| G47474  | TrGAroC  | OXYL1OOH + OH → OXYL1O2                                                 | 4.65E-11                                 | Rickard and Pascoe (2009)                      |
| G47475  | TrGAroCN | MNCATECH + NO <sub>3</sub> → MNNCATECO2                                 | 5.03E-12                                 | Rickard and Pascoe (2009)                      |
| G47476  | TrGAroCN | MNCATECH + OH → MNCATECO2                                               | 6.83E-12                                 | Rickard and Pascoe (2009)                      |
| G47477  | TrGAroC  | MCATEC1O2 + HO <sub>2</sub> → MCATEC1OOH                                | KR02H02(7)                               | Rickard and Pascoe (2009)                      |
| G47478  | TrGAroCN | MCATEC1O2 + NO → MCATEC1O + NO <sub>2</sub>                             | KR02N0                                   | Rickard and Pascoe (2009)                      |
| G47479  | TrGAroCN | MCATEC1O2 + NO <sub>2</sub> → MCATEC1O + NO <sub>3</sub>                | K_C6H5O2_N02                             | Jagiella and Zabel (2007)*                     |
| G47480  | TrGAroCN | MCATEC1O2 + NO <sub>3</sub> → MCATEC1O + NO <sub>2</sub>                | KR02N03                                  | Rickard and Pascoe (2009)                      |
| G47481  | TrGAroC  | MCATEC1O2 → MCATEC1O                                                    | k1_R02s0R02                              | Rickard and Pascoe (2009)                      |
| G47482a | TrGAroCN | NPTLQO2 + HO <sub>2</sub> → NPTLQOOH                                    | KR02H02(7)*(1-rcoch2o2_oh)               | Rickard and Pascoe (2009)                      |
| G47482b | TrGAroCN | NPTLQO2 + HO <sub>2</sub> → C7CO4DB + NO <sub>2</sub> + OH              | KR02H02(7)*rcoch2o2_oh                   | Rickard and Pascoe (2009)*                     |
| G47483  | TrGAroCN | NPTLQO2 + NO → C7CO4DB + NO <sub>2</sub> + NO <sub>2</sub>              | KR02N0                                   | Rickard and Pascoe (2009)*                     |
| G47484  | TrGAroCN | NPTLQO2 + NO <sub>3</sub> → C7CO4DB + NO <sub>2</sub> + NO <sub>2</sub> | KR02N03                                  | Rickard and Pascoe (2009)*                     |
| G47485  | TrGAroCN | NPTLQO2 → C7CO4DB + NO <sub>2</sub>                                     | k1_R02s0R02                              | Rickard and Pascoe (2009)*                     |
| G47486a | TrGAroC  | PTLQO2 + HO <sub>2</sub> → PTLQOOH                                      | KR02H02(7)*(1-rchohch2o2_oh-rcoch2o2_oh) | Rickard and Pascoe (2009)                      |
| G47486b | TrGAroC  | PTLQO2 + HO <sub>2</sub> → C6CO2OHCO3 + OH                              | KR02H02(7)*(rchohch2o2_oh+rcoch2o2_oh)   | Rickard and Pascoe (2009)*                     |
| G47487  | TrGAroCN | PTLQO2 + NO → C6CO2OHCO3 + NO <sub>2</sub>                              | KR02N0                                   | Rickard and Pascoe (2009)*                     |
| G47488  | TrGAroCN | PTLQO2 + NO <sub>3</sub> → C6CO2OHCO3 + NO <sub>2</sub>                 | KR02N03                                  | Rickard and Pascoe (2009)*                     |
| G47489  | TrGAroC  | PTLQO2 → C6CO2OHCO3                                                     | k1_R02s0R02                              | Rickard and Pascoe (2009)*                     |

Table 1: Gas phase reactions (... continued)

| #       | labels   | reaction                                                                                               | rate coefficient             | reference                  |
|---------|----------|--------------------------------------------------------------------------------------------------------|------------------------------|----------------------------|
| G47490  | TrGAroCN | DNCRES + NO <sub>3</sub> → NDNCRESO2                                                                   | 7.83E-15                     | Rickard and Pascoe (2009)  |
| G47491  | TrGAroCN | DNCRES + OH → DNCRESO2                                                                                 | 5.10E-14                     | Rickard and Pascoe (2009)  |
| G47492  | TrGAroCN | NCRES1O2 + HO <sub>2</sub> → NCRES1OOH                                                                 | KR02H02(7)                   | Rickard and Pascoe (2009)  |
| G47493  | TrGAroCN | NCRES1O2 + NO → NCRES1O + NO <sub>2</sub>                                                              | KR02N0                       | Rickard and Pascoe (2009)  |
| G47494  | TrGAroCN | NCRES1O2 + NO <sub>2</sub> → NCRES1O + NO <sub>3</sub>                                                 | K_C6H5O2_NO2                 | Jagiella and Zabel (2007)* |
| G47495  | TrGAroCN | NCRES1O2 + NO <sub>3</sub> → NCRES1O + NO <sub>2</sub>                                                 | KR02N03                      | Rickard and Pascoe (2009)  |
| G47496  | TrGAroCN | NCRES1O2 → NCRES1O                                                                                     | k1_R02sR02                   | Rickard and Pascoe (2009)  |
| G47497a | TrGAroCN | MNNCATECO2 + HO <sub>2</sub> → MNNCATCOOH                                                              | KR02H02(7)*(1-rchohch2o2_oh) | Rickard and Pascoe (2009)  |
| G47497b | TrGAroCN | MNNCATECO2 + HO <sub>2</sub> → NC4MDCO2HN + HCOCO <sub>2</sub> H + NO <sub>2</sub> + OH                | KR02H02(7)*rchohch2o2_oh     | Rickard and Pascoe (2009)* |
| G47498  | TrGAroCN | MNNCATECO2 + NO → NC4MDCO2HN + HCOCO <sub>2</sub> H + NO <sub>2</sub> + NO <sub>2</sub>                | KR02N0                       | Rickard and Pascoe (2009)* |
| G47499  | TrGAroCN | MNNCATECO2 + NO <sub>3</sub> → NC4MDCO2HN + HCOCO <sub>2</sub> H + NO <sub>2</sub> + NO <sub>2</sub>   | KR02N03                      | Rickard and Pascoe (2009)* |
| G47500  | TrGAroCN | MNNCATECO2 → NC4MDCO2HN + HCOCO <sub>2</sub> H + NO <sub>2</sub>                                       | k1_R02ISOPD02                | Rickard and Pascoe (2009)  |
| G47501a | TrGAroCN | MNCATECO2 + HO <sub>2</sub> → MNCATECOOH                                                               | KR02H02(7)*(1-rchohch2o2_oh) | Rickard and Pascoe (2009)  |
| G47501b | TrGAroCN | MNCATECO2 + HO <sub>2</sub> → NC4MDCO2HN + HCOCO <sub>2</sub> H + HO <sub>2</sub> + OH                 | KR02H02(7)*rchohch2o2_oh     | Rickard and Pascoe (2009)* |
| G47502  | TrGAroCN | MNCATECO2 + NO → NC4MDCO2HN + HCOCO <sub>2</sub> H + HO <sub>2</sub> + NO <sub>2</sub>                 | KR02N0                       | Rickard and Pascoe (2009)* |
| G47503  | TrGAroCN | MNCATECO2 + NO <sub>3</sub> → NC4MDCO2HN + HCOCO <sub>2</sub> H + HO <sub>2</sub> + NO <sub>2</sub>    | KR02N03                      | Rickard and Pascoe (2009)* |
| G47504  | TrGAroCN | MNCATECO2 → NC4MDCO2HN + HCOCO <sub>2</sub> H + HO <sub>2</sub>                                        | k1_R02ISOPD02                | Rickard and Pascoe (2009)* |
| G47505  | TrGAroC  | MCATEC1OOH + OH → MCATEC1O2                                                                            | 2.05E-10                     | Rickard and Pascoe (2009)  |
| G47506  | TrGAroCN | NPTLQOOH + OH → NPTLQO2                                                                                | 8.56E-11                     | Rickard and Pascoe (2009)  |
| G47507  | TrGAroC  | PTLQOOH + OH → PTLQCO + OH                                                                             | 1.42E-10                     | Rickard and Pascoe (2009)  |
| G47508  | TrGAroC  | PTLQCO + OH → C6CO2OHCO3                                                                               | 7.95E-11                     | Rickard and Pascoe (2009)  |
| G47509a | TrGAroCN | NDNCRESO2 + HO <sub>2</sub> → NDNCRESOOH                                                               | KR02H02(7)*(1-rchohch2o2_oh) | Rickard and Pascoe (2009)  |
| G47509b | TrGAroCN | NDNCRESO2 + HO <sub>2</sub> → NC4MDCO2HN + HNO <sub>3</sub> + 2 CO + NO <sub>2</sub> + OH              | KR02H02(7)*rchohch2o2_oh     | Rickard and Pascoe (2009)* |
| G47510  | TrGAroCN | NDNCRESO2 + NO → NC4MDCO2HN + HNO <sub>3</sub> + 2 CO + NO <sub>2</sub> + NO <sub>2</sub>              | KR02N0                       | Rickard and Pascoe (2009)* |
| G47511  | TrGAroCN | NDNCRESO2 + NO <sub>3</sub> → NC4MDCO2HN + HNO <sub>3</sub> + 2 CO + NO <sub>2</sub> + NO <sub>2</sub> | KR02N03                      | Rickard and Pascoe (2009)* |
| G47512  | TrGAroCN | NDNCRESO2 → NC4MDCO2HN + HNO <sub>3</sub> + 2 CO + NO <sub>2</sub>                                     | k1_R02ISOPD02                | Rickard and Pascoe (2009)* |

Table 1: Gas phase reactions (... continued)

| #       | labels   | reaction                                                                                                              | rate coefficient                                  | reference                  |
|---------|----------|-----------------------------------------------------------------------------------------------------------------------|---------------------------------------------------|----------------------------|
| G47513a | TrGAroCN | $\text{DNCRESO}_2 + \text{HO}_2 \rightarrow \text{DNCRESOOH}$                                                         | $\text{KR02H02(7)} * (1 - \text{rchohch2o2\_oh})$ | Rickard and Pascoe (2009)  |
| G47513b | TrGAroCN | $\text{DNCRESO}_2 + \text{HO}_2 \rightarrow \text{NC4MDCO2HN} + \text{HCOCO}_2\text{H} + \text{NO}_2 + \text{OH}$     | $\text{KR02H02(7)} * \text{rchohch2o2\_oh}$       | Rickard and Pascoe (2009)* |
| G47514  | TrGAroCN | $\text{DNCRESO}_2 + \text{NO} \rightarrow \text{NC4MDCO2HN} + \text{HCOCO}_2\text{H} + \text{NO}_2 + \text{NO}_2$     | KR02N0                                            | Rickard and Pascoe (2009)* |
| G47515  | TrGAroCN | $\text{DNCRESO}_2 + \text{NO}_3 \rightarrow \text{NC4MDCO2HN} + \text{HCOCO}_2\text{H} + \text{NO}_2 + \text{NO}_2$   | KR02N03                                           | Rickard and Pascoe (2009)* |
| G47516  | TrGAroCN | $\text{DNCRESO}_2 \rightarrow \text{NC4MDCO2HN} + \text{HCOCO}_2\text{H} + \text{NO}_2$                               | k1_R02ISOPD02                                     | Rickard and Pascoe (2009)* |
| G47517  | TrGAroCN | $\text{NCRES10OH} + \text{OH} \rightarrow \text{NCRES1O2}$                                                            | 1.53E-12                                          | Rickard and Pascoe (2009)  |
| G47518  | TrGAroCN | $\text{MNNCATECOOH} + \text{OH} \rightarrow \text{MNNCATECO2}$                                                        | 0.6*k_CH300H_OH                                   | Rickard and Pascoe (2009)  |
| G47519  | TrGAroCN | $\text{MNCATECOOH} + \text{OH} \rightarrow \text{MNCATECO2}$                                                          | 0.6*k_CH300H_OH                                   | Rickard and Pascoe (2009)  |
| G47520  | TrGAroC  | $\text{C7CO4DB} + \text{OH} \rightarrow \text{CO} + \text{CO} + \text{CH}_3\text{C(O)} + \text{HCOCOCHO}$             | 9.58E-11                                          | Rickard and Pascoe (2009)  |
| G47521a | TrGAroC  | $\text{C6CO2OHCO3} + \text{HO}_2 \rightarrow \text{C5134CO2OH} + \text{HO}_2 + \text{CO} + \text{CO}_2 + \text{OH}$   | KAPH02*rco3_oh                                    | Rickard and Pascoe (2009)  |
| G47521b | TrGAroC  | $\text{C6CO2OHCO3} + \text{HO}_2 \rightarrow \text{C6COOHCO3H}$                                                       | KAPH02*(rco3_oh+rco3_o3)                          | Rickard and Pascoe (2009)  |
| G47522  | TrGAroCN | $\text{C6CO2OHCO3} + \text{NO} \rightarrow \text{C5134CO2OH} + \text{HO}_2 + \text{CO} + \text{CO}_2 + \text{NO}_2$   | KAPNO                                             | Rickard and Pascoe (2009)  |
| G47523  | TrGAroCN | $\text{C6CO2OHCO3} + \text{NO}_2 \rightarrow \text{C6CO2OHPAN}$                                                       | k_CH3C03_NO2                                      | Rickard and Pascoe (2009)  |
| G47524  | TrGAroCN | $\text{C6CO2OHCO3} + \text{NO}_3 \rightarrow \text{C5134CO2OH} + \text{HO}_2 + \text{CO} + \text{CO}_2 + \text{NO}_2$ | KR02N03*1.74                                      | Rickard and Pascoe (2009)  |
| G47525  | TrGAroC  | $\text{C6CO2OHCO3} \rightarrow \text{C5134CO2OH} + \text{HO}_2 + \text{CO} + \text{CO}_2$                             | k1_R02RC03                                        | Rickard and Pascoe (2009)  |
| G47526  | TrGAroCN | $\text{NDNCRESOOH} + \text{OH} \rightarrow \text{NDNCRESO2}$                                                          | 0.6*k_CH300H_OH                                   | Rickard and Pascoe (2009)  |
| G47527  | TrGAroCN | $\text{DNCRESOOH} + \text{OH} \rightarrow \text{DNCRESO2}$                                                            | 0.6*k_CH300H_OH                                   | Rickard and Pascoe (2009)  |
| G47528  | TrGAroC  | $\text{C6COOHCO3H} + \text{OH} \rightarrow \text{C6CO2OHCO3}$                                                         | 9.29E-11                                          | Rickard and Pascoe (2009)  |
| G47529  | TrGAroCN | $\text{C6CO2OHPAN} + \text{OH} \rightarrow \text{C5134CO2OH} + \text{CO} + \text{CO} + \text{NO}_2$                   | 8.96E-11                                          | Rickard and Pascoe (2009)  |
| G47530  | TrGAroCN | $\text{C6CO2OHPAN} \rightarrow \text{C6CO2OHCO3} + \text{NO}_2$                                                       | k_PAN_M                                           | Rickard and Pascoe (2009)  |
| G48200  | TrGTerC  | $\text{C85O2} \rightarrow \text{C86O2}$                                                                               | k1_R02tR02                                        | Rickard and Pascoe (2009)  |
| G48201  | TrGTerC  | $\text{C85O2} + \text{HO}_2 \rightarrow \text{C85OOH}$                                                                | KR02H02(8)                                        | Rickard and Pascoe (2009)  |
| G48202  | TrGTerCN | $\text{C85O2} + \text{NO} \rightarrow \text{C86O2} + \text{NO}_2$                                                     | KR02N0                                            | Rickard and Pascoe (2009)* |
| G48203  | TrGTerC  | $\text{C85OOH} + \text{OH} \rightarrow \text{C85O2}$                                                                  | 1.29E-11                                          | Rickard and Pascoe (2009)  |
| G48204  | TrGTerC  | $\text{C86O2} \rightarrow \text{C511O2} + \text{CH}_3\text{COCH}_3$                                                   | k1_R02tR02                                        | Rickard and Pascoe (2009)  |
| G48205  | TrGTerCN | $\text{C86O2} + \text{NO} \rightarrow \text{C511O2} + \text{CH}_3\text{COCH}_3 + \text{NO}_2$                         | KR02N0                                            | Rickard and Pascoe (2009)* |
| G48206  | TrGTerC  | $\text{C86O2} + \text{HO}_2 \rightarrow \text{C86OOH}$                                                                | KR02H02(8)                                        | Rickard and Pascoe (2009)  |

Table 1: Gas phase reactions (... continued)

| #       | labels   | reaction                                             | rate coefficient                               | reference                  |
|---------|----------|------------------------------------------------------|------------------------------------------------|----------------------------|
| G48207  | TrGTerC  | $C86OOH + OH \rightarrow C86O2$                      | 3.45E-11                                       | Rickard and Pascoe (2009)  |
| G48208  | TrGTerC  | $C811O2 \rightarrow C812O2$                          | k1_R02pR02                                     | Rickard and Pascoe (2009)  |
| G48209  | TrGTerC  | $C811O2 + HO_2 \rightarrow 8 \text{ L CARBON}$       | KR02H02(8)                                     | Rickard and Pascoe (2009)  |
| G48210  | TrGTerCN | $C811O2 + NO \rightarrow C812O2 + NO_2$              | KR02N0                                         | Rickard and Pascoe (2009)* |
| G48211  | TrGTerC  | $C812O2 \rightarrow C813O2$                          | k1_R02t0R02                                    | Rickard and Pascoe (2009)  |
| G48212  | TrGTerCN | $C812O2 + NO \rightarrow C813O2 + NO_2$              | KR02N0                                         | Rickard and Pascoe (2009)* |
| G48213  | TrGTerC  | $C812O2 + HO_2 \rightarrow C812OOH$                  | KR02H02(8)                                     | Rickard and Pascoe (2009)  |
| G48214  | TrGTerC  | $C812OOH + OH \rightarrow C812O2$                    | 1.09E-11                                       | Rickard and Pascoe (2009)  |
| G48215  | TrGTerC  | $C813O2 \rightarrow CH_3COCH_3 + C512O2$             | k1_R02tR02                                     | Rickard and Pascoe (2009)  |
| G48216  | TrGTerCN | $C813O2 + NO \rightarrow CH_3COCH_3 + C512O2 + NO_2$ | KR02N0                                         | Rickard and Pascoe (2009)* |
| G48217  | TrGTerC  | $C813O2 + HO_2 \rightarrow C813OOH$                  | KR02H02(8)                                     | Rickard and Pascoe (2009)  |
| G48218  | TrGTerC  | $C813OOH + OH \rightarrow C813O2$                    | 1.86E-11                                       | Rickard and Pascoe (2009)  |
| G48219  | TrGTerCN | $C721CHO + NO_3 \rightarrow C721CO3 + HNO_3$         | KN03AL*8.5                                     | Rickard and Pascoe (2009)  |
| G48220  | TrGTerC  | $C721CHO + OH \rightarrow C721CO3$                   | 2.63E-11                                       | Rickard and Pascoe (2009)  |
| G48221a | TrGTerC  | $C721CO3 + HO_2 \rightarrow C721CO3H$                | KAPH02*rco3_ooH                                | Rickard and Pascoe (2009)  |
| G48221b | TrGTerC  | $C721CO3 + HO_2 \rightarrow C721O2 + CO_2 + OH$      | KAPH02*rco3_oh                                 | Rickard and Pascoe (2009)  |
| G48221c | TrGTerC  | $C721CO3 + HO_2 \rightarrow NORPINIC + O_3$          | KAPH02*rco3_o3                                 | Rickard and Pascoe (2009)  |
| G48222  | TrGTerCN | $C721CO3 + NO \rightarrow C721O2 + CO_2 + NO_2$      | KAPNO                                          | Rickard and Pascoe (2009)* |
| G48223  | TrGTerCN | $C721CO3 + NO_2 \rightarrow C721PAN$                 | k_CH3CO3_NO2                                   | Rickard and Pascoe (2009)  |
| G48224  | TrGTerCN | $C721CO3 + NO_3 \rightarrow C721O2 + CO_2 + NO_2$    | KR02N03*1.74                                   | Rickard and Pascoe (2009)  |
| G48225  | TrGTerC  | $C721CO3 \rightarrow C721O2 + CO_2$                  | k1_R02RC03*0.9                                 | Taraborrelli (2016)        |
| G48226  | TrGTerC  | $C721CO3 \rightarrow NORPINIC$                       | k1_R02RC03*0.1                                 | Taraborrelli (2016)        |
| G48227  | TrGTerC  | $C721CO3H + OH \rightarrow C721CO3$                  | 9.65E-12                                       | Rickard and Pascoe (2009)  |
| G48228  | TrGTerC  | $NORPINIC + OH \rightarrow C721O2 + CO_2$            | 6.57E-12                                       | Rickard and Pascoe (2009)  |
| G48229  | TrGTerCN | $C721PAN + OH \rightarrow C721OOH + CO + NO_2$       | 2.96E-12                                       | Rickard and Pascoe (2009)  |
| G48230  | TrGTerCN | $C721PAN \rightarrow C721CO3 + NO_2$                 | k_PAN_M                                        | Rickard and Pascoe (2009)  |
| G48231  | TrGTerC  | $C8BC + OH \rightarrow C8BCO2$                       | 3.04E-12                                       | Rickard and Pascoe (2009)  |
| G48232  | TrGTerC  | $C8BCO2 + HO_2 \rightarrow C8BCOOH$                  | KR02H02(8)                                     | Rickard and Pascoe (2009)  |
| G48233a | TrGTerCN | $C8BCO2 + NO \rightarrow C89O2 + NO_2$               | KR02N0*(1.-alpha_AN(8,2,0,0,0,<br>temp, cair)) | Rickard and Pascoe (2009)  |
| G48233b | TrGTerCN | $C8BCO2 + NO \rightarrow C8BCNO3$                    | KR02N0*alpha_AN(8,2,0,0,0,temp,<br>cair)       | Rickard and Pascoe (2009)  |
| G48234  | TrGTerC  | $C8BCO2 \rightarrow C89O2$                           | k1_R02sR02                                     | Rickard and Pascoe (2009)  |
| G48235  | TrGTerC  | $C8BCOOH + OH \rightarrow C8BCCO + OH$               | 1.62E-11                                       | Rickard and Pascoe (2009)  |
| G48236  | TrGTerCN | $C8BCNO3 + OH \rightarrow C8BCCO + NO_2$             | 1.84E-12                                       | Rickard and Pascoe (2009)  |

Table 1: Gas phase reactions (... continued)

| #       | labels   | reaction                                                                                                                                                        | rate coefficient                             | reference                  |
|---------|----------|-----------------------------------------------------------------------------------------------------------------------------------------------------------------|----------------------------------------------|----------------------------|
| G48237  | TrGTerC  | $C_8BCCO + OH \rightarrow C_8O_2$                                                                                                                               | 3.94E-12                                     | Rickard and Pascoe (2009)  |
| G48238  | TrGTerC  | $C_8O_2 + HO_2 \rightarrow C_8OOH$                                                                                                                              | KR02H02(8)                                   | Rickard and Pascoe (2009)  |
| G48239a | TrGTerCN | $C_8O_2 + NO \rightarrow C_810O_2 + NO_2$                                                                                                                       | KR02N0*(1.-alpha_AN(7,2,0,0,0, temp, cair))  | Rickard and Pascoe (2009)  |
| G48239b | TrGTerCN | $C_8O_2 + NO \rightarrow C_89NO_3$                                                                                                                              | KR02N0*alpha_AN(7,2,0,0,0, temp, cair)       | Rickard and Pascoe (2009)  |
| G48240  | TrGTerCN | $C_8O_2 + NO_3 \rightarrow C_810O_2 + NO_2$                                                                                                                     | KR02N03                                      | Rickard and Pascoe (2009)  |
| G48241  | TrGTerC  | $C_8O_2 \rightarrow C_810O_2$                                                                                                                                   | k1_R02tR02                                   | Rickard and Pascoe (2009)  |
| G48242  | TrGTerC  | $C_8OOH + OH \rightarrow C_8O_2$                                                                                                                                | 3.61E-11                                     | Rickard and Pascoe (2009)  |
| G48243  | TrGTerCN | $C_89NO_3 + OH \rightarrow CH_3COCH_3 + CO13C4CHO + NO_2$                                                                                                       | 2.56E-11                                     | Rickard and Pascoe (2009)  |
| G48244  | TrGTerC  | $C_810O_2 + HO_2 \rightarrow C_810OOH$                                                                                                                          | KR02H02(8)                                   | Rickard and Pascoe (2009)  |
| G48245a | TrGTerCN | $C_810O_2 + NO \rightarrow CH_3COCH_3 + C_514O_2 + NO_2$                                                                                                        | KR02N0*(1.-alpha_AN(10,3,0,0,0, temp, cair)) | Rickard and Pascoe (2009)  |
| G48245b | TrGTerCN | $C_810O_2 + NO \rightarrow C_810NO_3$                                                                                                                           | KR02N0*alpha_AN(10,3,0,0,0, temp, cair)      | Rickard and Pascoe (2009)  |
| G48246  | TrGTerCN | $C_810O_2 + NO_3 \rightarrow CH_3COCH_3 + C_514O_2 + NO_2$                                                                                                      | KR02N03                                      | Rickard and Pascoe (2009)  |
| G48247  | TrGTerC  | $C_810O_2 \rightarrow CH_3COCH_3 + C_514O_2$                                                                                                                    | k1_R02tR02                                   | Rickard and Pascoe (2009)  |
| G48248  | TrGTerC  | $C_810OOH + OH \rightarrow C_810O_2$                                                                                                                            | 8.35E-11                                     | Rickard and Pascoe (2009)  |
| G48249  | TrGTerCN | $C_810NO_3 + OH \rightarrow CH_3COCH_3 + CO13C4CHO + NO_2$                                                                                                      | 4.96E-11                                     | Rickard and Pascoe (2009)  |
| G48400a | TrGAroC  | $LXYL + OH \rightarrow TLEPOXMUC + HO_2 + LCARBON$                                                                                                              | 0.401E-11                                    | Rickard and Pascoe (2009)* |
| G48400b | TrGAroC  | $LXYL + OH \rightarrow C_6H_5CH_2O_2 + LCARBON$                                                                                                                 | 0.101E-11                                    | Rickard and Pascoe (2009)* |
| G48400c | TrGAroC  | $LXYL + OH \rightarrow CRESOL + LCARBON$                                                                                                                        | 0.261E-11                                    | Rickard and Pascoe (2009)* |
| G48400d | TrGAroC  | $LXYL + OH \rightarrow TLBIPERO_2 + HO_2 + LCARBON$                                                                                                             | 0.932E-11                                    | Rickard and Pascoe (2009)* |
| G48401  | TrGAroCN | $LXYL + NO_3 \rightarrow C_6H_5CH_2O_2 + HNO_3 + LCARBON$                                                                                                       | 3.9E-16                                      | Rickard and Pascoe (2009)* |
| G48402  | TrGAroC  | $EBENZ + OH \rightarrow .10 TLEPOXMUC + .07 C_6H_5CH_2O_2 + .18 CRESOL + .65 TLBIPERO_2 + .28 HO_2 + LCARBON$                                                   | 7.00E-12                                     | Rickard and Pascoe (2009)* |
| G48403  | TrGAroCN | $EBENZ + NO_3 \rightarrow C_6H_5CH_2O_2 + HNO_3 + LCARBON$                                                                                                      | 1.20E-16                                     | Rickard and Pascoe (2009)* |
| G48404  | TrGAroCN | $STYRENE + NO_3 \rightarrow NSTYRENO_2$                                                                                                                         | 1.50E-12                                     | Rickard and Pascoe (2009)  |
| G48405  | TrGAroC  | $STYRENE + O_3 \rightarrow .545 HCHO + .1 BENZENE + .28 C_6H_5O_2 + .56 CO + .36 OH + .28 HO_2 + .075 PHCOOH + .545 BENZAL + .09 H_2O_2 + .075 HCOOH + .2 CO_2$ | 1.70E-17                                     | Rickard and Pascoe (2009)* |
| G48406  | TrGAroC  | $STYRENE + OH \rightarrow STYRENO_2$                                                                                                                            | 5.80E-11                                     | Rickard and Pascoe (2009)  |
| G48407  | TrGAroCN | $NSTYRENO_2 + HO_2 \rightarrow NSTYRENOOH$                                                                                                                      | KR02H02(8)                                   | Rickard and Pascoe (2009)  |
| G48408  | TrGAroCN | $NSTYRENO_2 + NO \rightarrow NO_2 + NO_2 + HCHO + BENZAL$                                                                                                       | KR02N0                                       | Rickard and Pascoe (2009)* |

Table 1: Gas phase reactions (... continued)

| #       | labels   | reaction                                                                        | rate coefficient                             | reference                                      |
|---------|----------|---------------------------------------------------------------------------------|----------------------------------------------|------------------------------------------------|
| G48409  | TrGAroCN | NSTYRENO2 + NO <sub>3</sub> → NO <sub>2</sub> + NO <sub>2</sub> + HCHO + BENZAL | KR02N03                                      | Rickard and Pascoe (2009)*                     |
| G48410  | TrGAroCN | NSTYRENO2 → NO <sub>2</sub> + HCHO + BENZAL                                     | k1_R02sR02                                   | Rickard and Pascoe (2009)*                     |
| G48411  | TrGAroCN | NSTYRENOOH + OH → NSTYRENO2                                                     | 6.16E-11                                     | Rickard and Pascoe (2009)                      |
| G48412a | TrGAroC  | STYRENO2 + HO <sub>2</sub> → STYRENOOH                                          | KR02H02(8)*(1-rchohch2o2_oh)                 | Rickard and Pascoe (2009)                      |
| G48412b | TrGAroC  | STYRENO2 + HO <sub>2</sub> → HO <sub>2</sub> + OH + HCHO + BENZAL               | KR02H02(8)*rchohch2o2_oh                     | Rickard and Pascoe (2009)*                     |
| G48413  | TrGAroCN | STYRENO2 + NO → NO <sub>2</sub> + HO <sub>2</sub> + HCHO + BENZAL               | KR02N0                                       | Rickard and Pascoe (2009)*                     |
| G48414  | TrGAroCN | STYRENO2 + NO <sub>3</sub> → NO <sub>2</sub> + HO <sub>2</sub> + HCHO + BENZAL  | KR02N03                                      | Rickard and Pascoe (2009)*                     |
| G48415  | TrGAroC  | STYRENO2 → HO <sub>2</sub> + HCHO + BENZAL                                      | k1_R02sR02                                   | Rickard and Pascoe (2009)*                     |
| G48416  | TrGAroC  | STYRENOOH + OH → STYRENO2                                                       | 6.16E-11                                     | Rickard and Pascoe (2009)                      |
| G49200  | TrGTerC  | C96O2 → C97O2                                                                   | k1_R02pR02                                   | Rickard and Pascoe (2009)                      |
| G49201  | TrGTerC  | C96O2 + HO <sub>2</sub> → C96OOH                                                | KR02H02(9)                                   | Rickard and Pascoe (2009)                      |
| G49202a | TrGTerCN | C96O2 + NO → C97O2 + NO <sub>2</sub>                                            | KR02N0*(1.-alpha_AN(10,1,0,0,0, temp, cair)) | Rickard and Pascoe (2009)                      |
| G49202b | TrGTerCN | C96O2 + NO → C96NO3                                                             | KR02N0*alpha_AN(10,1,0,0,0, temp, cair)      | Rickard and Pascoe (2009)                      |
| G49203  | TrGTerCN | C96NO3 + OH → NORPINAL + NO <sub>2</sub>                                        | 2.88E-12                                     | Rickard and Pascoe (2009)                      |
| G49204a | TrGTerC  | C96OOH + OH → C96O2                                                             | 0.6*k_CH300H_OH                              | Rickard and Pascoe (2009)                      |
| G49205b | TrGTerC  | C96OOH + OH → NORPINAL + OH                                                     | 1.30E-11                                     | Rickard and Pascoe (2009)                      |
| G49206  | TrGTerC  | C97O2 → C98O2                                                                   | k1_R02tR02                                   | Rickard and Pascoe (2009)                      |
| G49207  | TrGTerCN | C97O2 + NO → C98O2 + NO <sub>2</sub>                                            | KR02N0                                       | Rickard and Pascoe (2009)*                     |
| G49208a | TrGTerC  | C97O2 + HO <sub>2</sub> → C97OOH                                                | KR02H02(9)*rcoch2o2_ooH                      | Rickard and Pascoe (2009), Taraborrelli (2016) |
| G49208b | TrGTerC  | C97O2 + HO <sub>2</sub> → C98O2 + OH                                            | KR02H02(9)*rcoch2o2_oh                       | Rickard and Pascoe (2009), Taraborrelli (2016) |
| G49209  | TrGTerC  | C97OOH + OH → C97O2                                                             | 1.05E-11                                     | Rickard and Pascoe (2009)                      |
| G49210  | TrGTerC  | C98O2 → C614O2 + CH <sub>3</sub> COCH <sub>3</sub>                              | k1_R02tR02                                   | Rickard and Pascoe (2009)                      |
| G49211a | TrGTerCN | C98O2 + NO → C614O2 + CH <sub>3</sub> COCH <sub>3</sub> + NO <sub>2</sub>       | KR02N0*(1.-alpha_AN(12,3,0,0,0, temp, cair)) | Rickard and Pascoe (2009)                      |
| G49211b | TrGTerCN | C98O2 + NO → 9 LCARBON + LNITROGEN                                              | KR02N0*alpha_AN(12,3,0,0,0, temp, cair)      | Rickard and Pascoe (2009)                      |
| G49212  | TrGTerC  | C98O2 + HO <sub>2</sub> → C98OOH                                                | KR02H02(9)                                   | Rickard and Pascoe (2009)                      |
| G49213  | TrGTerC  | C98OOH + OH → C98O2                                                             | 2.05E-11                                     | Rickard and Pascoe (2009)                      |
| G49214  | TrGTerC  | NORPINAL + OH → C85CO3                                                          | 2.64E-11                                     | Rickard and Pascoe (2009)                      |
| G49215  | TrGTerCN | NORPINAL + NO <sub>3</sub> → C85CO3 + HNO <sub>3</sub>                          | KN03AL*8.5                                   | Rickard and Pascoe (2009)                      |

Table 1: Gas phase reactions (... continued)

| #       | labels   | reaction                                                           | rate coefficient          | reference                                        |
|---------|----------|--------------------------------------------------------------------|---------------------------|--------------------------------------------------|
| G49216  | TrGTerC  | $C85CO3 \rightarrow C85O2 + CO_2$                                  | k1_R02RC03                | Rickard and Pascoe (2009)                        |
| G49217  | TrGTerCN | $C85CO3 + NO \rightarrow C85O2 + CO_2 + NO_2$                      | KAPNO                     | Rickard and Pascoe (2009)                        |
| G49218  | TrGTerCN | $C85CO3 + NO_2 \rightarrow C9PAN2$                                 | k_CH3C03_NO2              | Rickard and Pascoe (2009)                        |
| G49219a | TrGTerC  | $C85CO3 + HO_2 \rightarrow C85CO3H$                                | KAPH02*(rco3_ooH+rco3_o3) | Rickard and Pascoe (2009)                        |
| G49219b | TrGTerC  | $C85CO3 + HO_2 \rightarrow C85O2 + CO_2 + OH$                      | KAPH02*rco3_oh            | Rickard and Pascoe (2009)                        |
| G49220  | TrGTerCN | $C9PAN2 \rightarrow C85CO3 + NO_2$                                 | k_PAN_M                   | Rickard and Pascoe (2009)                        |
| G49221  | TrGTerCN | $C9PAN2 + OH \rightarrow C85OOH + CO + NO_2$                       | 6.60E-12                  | Rickard and Pascoe (2009)                        |
| G49222  | TrGTerC  | $C85CO3H + OH \rightarrow C85CO3$                                  | 1.02E-11                  | Rickard and Pascoe (2009)                        |
| G49223a | TrGTerC  | $C89CO3 \rightarrow .8 C811CO3 + .2 C89O2 + .2 CO_2$               | k1_R02RC03*0.9            | Taraborrelli (2016)                              |
| G49223b | TrGTerC  | $C89CO3 \rightarrow C89CO2H$                                       | k1_R02RC03*0.1            | Taraborrelli (2016)                              |
| G49224a | TrGTerC  | $C89CO3 + HO_2 \rightarrow C89CO3H$                                | KAPH02*rco3_ooH           | Rickard and Pascoe (2009)                        |
| G49224b | TrGTerC  | $C89CO3 + HO_2 \rightarrow C89CO2H + O_3$                          | KAPH02*rco3_o3            | Rickard and Pascoe (2009)                        |
| G49224c | TrGTerC  | $C89CO3 + HO_2 \rightarrow .80 C811CO3 + .20 C89O2 + .2 CO_2 + OH$ | KAPH02*rco3_oh            | Rickard and Pascoe (2009)                        |
| G49225  | TrGTerCN | $C89CO3 + NO_2 \rightarrow C89PAN$                                 | k_CH3C03_NO2              | Rickard and Pascoe (2009)                        |
| G49226  | TrGTerCN | $C89CO3 + NO \rightarrow .8 C811CO3 + .2 C89O2 + .2 CO_2 + NO_2$   | KAPNO                     | Rickard and Pascoe (2009)                        |
| G49227  | TrGTerC  | $C89CO2H + OH \rightarrow .8 C811CO3 + .2 C89O2 + .2 CO_2$         | 2.69E-11                  | Rickard and Pascoe (2009)                        |
| G49228  | TrGTerC  | $C89CO3H + OH \rightarrow C89CO3$                                  | 3.00E-11                  | Rickard and Pascoe (2009)                        |
| G49229  | TrGTerCN | $C89PAN \rightarrow C89CO3 + NO_2$                                 | k_PAN_M                   | Rickard and Pascoe (2009)                        |
| G49230  | TrGTerCN | $C89PAN + OH \rightarrow CH_3COCH_3 + CO13C4CHO + CO + NO_2$       | 2.52E-11                  | Rickard and Pascoe (2009)                        |
| G49231a | TrGTerC  | $C811CO3 \rightarrow C811O2 + CO_2$                                | k1_R02RC03*0.9            | Taraborrelli (2016)                              |
| G49231b | TrGTerC  | $C811CO3 \rightarrow PINIC$                                        | k1_R02RC03*0.1            | Taraborrelli (2016)                              |
| G49232a | TrGTerC  | $C811CO3 + HO_2 \rightarrow C811CO3H$                              | KAPH02*rco3_ooH           | Rickard and Pascoe (2009)                        |
| G49232b | TrGTerC  | $C811CO3 + HO_2 \rightarrow PINIC + O_3$                           | KAPH02*rco3_o3            | Rickard and Pascoe (2009)                        |
| G49232c | TrGTerC  | $C811CO3 + HO_2 \rightarrow C811O2 + CO_2 + OH$                    | KAPH02*rco3_oh            | Rickard and Pascoe (2009)                        |
| G49233  | TrGTerCN | $C811CO3 + NO \rightarrow C811O2 + CO_2 + NO_2$                    | KAPNO                     | Rickard and Pascoe (2009)                        |
| G49234  | TrGTerCN | $C811CO3 + NO_2 \rightarrow C811PAN$                               | k_CH3C03_NO2              | Rickard and Pascoe (2009)                        |
| G49235  | TrGTerC  | $PINIC + OH \rightarrow C811O2 + CO_2$                             | 7.29E-12                  | Rickard and Pascoe (2009)                        |
| G49236  | TrGTerC  | $NOPINONE + OH \rightarrow NOPINDO2$                               | 1.55E-11                  | Capouet et al. (2008), Rickard and Pascoe (2009) |
| G49237a | TrGTerC  | $NOPINDO2 + HO_2 \rightarrow NOPINDOOH$                            | KR02H02(9)*rcoch2o2_ooH   | Rickard and Pascoe (2009), Taraborrelli (2016)   |

Table 1: Gas phase reactions (... continued)

| #       | labels   | reaction                                                                                                                       | rate coefficient                                                                             | reference                                      |
|---------|----------|--------------------------------------------------------------------------------------------------------------------------------|----------------------------------------------------------------------------------------------|------------------------------------------------|
| G49237b | TrGTerC  | $\text{NOPINDO2} + \text{HO}_2 \rightarrow \text{C89CO3} + \text{OH}$                                                          | $\text{KR02H02(9)*rcoch2o2\_oh}$                                                             | Rickard and Pascoe (2009), Taraborrelli (2016) |
| G49238  | TrGTerCN | $\text{NOPINDO2} + \text{NO} \rightarrow \text{C89CO3} + \text{NO}_2$                                                          | KR02N0                                                                                       | Rickard and Pascoe (2009)*                     |
| G49239  | TrGTerC  | $\text{NOPINDO2} \rightarrow \text{C89CO3}$                                                                                    | $\text{k1\_R02p0R02}$                                                                        | Rickard and Pascoe (2009)                      |
| G49240  | TrGTerC  | $\text{NOPINDOOH} \rightarrow \text{NOPINDCO}$                                                                                 | 2.63E-11                                                                                     | Rickard and Pascoe (2009)                      |
| G49241  | TrGTerC  | $\text{NOPINDCO} + \text{OH} \rightarrow \text{C89CO3}$                                                                        | 3.07E-12                                                                                     | Rickard and Pascoe (2009)                      |
| G49242  | TrGTerC  | $\text{NOPINOO} \rightarrow \text{NOPINONE} + \text{H}_2\text{O}_2$                                                            | $6.00\text{E-18*c(ind\_H20)}$                                                                | Rickard and Pascoe (2009)                      |
| G49243  | TrGTerC  | $\text{NOPINOO} + \text{CO} \rightarrow \text{NOPINONE} + \text{CO}_2$                                                         | 1.2E-15                                                                                      | Rickard and Pascoe (2009)                      |
| G49244  | TrGTerCN | $\text{NOPINOO} + \text{NO} \rightarrow \text{NOPINONE} + \text{NO}_2$                                                         | 1.E-14                                                                                       | Rickard and Pascoe (2009)                      |
| G49245  | TrGTerCN | $\text{NOPINOO} + \text{NO}_2 \rightarrow \text{NOPINONE} + \text{NO}_3$                                                       | 1.E-15                                                                                       | Rickard and Pascoe (2009)                      |
| G49246  | TrGTerC  | $\text{NORPINENOL} + \text{OH} \rightarrow \text{HCOOH} + \text{OH} + \text{C86O2}$                                            | $\text{k\_CH2CHOH\_OH\_HCOOH}$                                                               | Taraborrelli (2016), So et al. (2014)*         |
| G49247  | TrGTerC  | $\text{NORPINENOL} + \text{HCOOH} \rightarrow \text{NORPINAL} + \text{HCOOH}$                                                  | $\text{k\_CH2CHOH\_HCOOH}$                                                                   | Taraborrelli (2016), daSilva (2010)*           |
| G49248  | TrGTerC  | $\text{NORPINAL} + \text{HCOOH} \rightarrow \text{NORPINENOL} + \text{HCOOH}$                                                  | $\text{k\_ALD\_HCOOH}$                                                                       | Taraborrelli (2016), daSilva (2010)*           |
| G49249  | TrGTerC  | $\text{C811CO3H} + \text{OH} \rightarrow \text{C811CO3}$                                                                       | 1.04E-11                                                                                     | Rickard and Pascoe (2009)                      |
| G49250  | TrGTerCN | $\text{C811PAN} \rightarrow \text{C811CO3} + \text{NO}_2$                                                                      | $\text{k\_PAN\_M}$                                                                           | Rickard and Pascoe (2009)                      |
| G49251  | TrGTerCN | $\text{C811PAN} + \text{OH} \rightarrow \text{C721CHO} + \text{CO} + \text{NO}_2$                                              | 6.77E-12                                                                                     | Rickard and Pascoe (2009)                      |
| G49400a | TrGAroC  | $\text{LTMB} + \text{OH} \rightarrow \text{TLEPOXMUC} + \text{HO}_2 + 2 \text{LCARBON}$                                        | 0.827E-11                                                                                    | Rickard and Pascoe (2009)*                     |
| G49400b | TrGAroC  | $\text{LTMB} + \text{OH} \rightarrow \text{C6H5CH2O2} + 2 \text{LCARBON}$                                                      | 0.189E-11                                                                                    | Rickard and Pascoe (2009)*                     |
| G49400c | TrGAroC  | $\text{LTMB} + \text{OH} \rightarrow \text{CRESOL} + 2 \text{LCARBON}$                                                         | 0.141E-11                                                                                    | Rickard and Pascoe (2009)*                     |
| G49400d | TrGAroC  | $\text{LTMB} + \text{OH} \rightarrow \text{TLBIPERO2} + \text{HO}_2 + 2 \text{LCARBON}$                                        | 2.917E-11                                                                                    | Rickard and Pascoe (2009)*                     |
| G49401  | TrGAroCN | $\text{LTMB} + \text{NO}_3 \rightarrow \text{C6H5CH2O2} + \text{HNO}_3 + 2 \text{LCARBON}$                                     | 1.52E-15                                                                                     | Rickard and Pascoe (2009)*                     |
| G40200  | TrGTerC  | $\text{APINENE} + \text{OH} \rightarrow .75 \text{LAPINABO2} + .15 \text{MENTHEN6ONE} + .15 \text{HO}_2 + .10 \text{ROO6R1O2}$ | $1.2\text{E-11*EXP(440./TEMP)}$                                                              | Atkinson et al. (2006)*                        |
| G40201a | TrGTerCN | $\text{LAPINABO2} + \text{NO} \rightarrow \text{PINAL} + \text{HO}_2 + \text{NO}_2$                                            | $\text{KR02N0*(1-.65*alpha\_AN(11,3,0,0,0,temp,cair))+.35*alpha\_AN(11,2,0,0,0,temp,cair))}$ | Rickard and Pascoe (2009), Taraborrelli (2016) |
| G40201b | TrGTerCN | $\text{LAPINABO2} + \text{NO} \rightarrow \text{LAPINABNO3}$                                                                   | $\text{KR02N0*(.65*alpha\_AN(11,3,0,0,0,temp,cair))+.35*alpha\_AN(11,2,0,0,0,temp,cair))}$   | Rickard and Pascoe (2009), Taraborrelli (2016) |
| G40202a | TrGTerC  | $\text{LAPINABO2} + \text{HO}_2 \rightarrow \text{LAPINABOOH}$                                                                 | $\text{KR02H02(10)*(1.-rchohch2o2\_oh)}$                                                     | Rickard and Pascoe (2009), Taraborrelli (2016) |



Table 1: Gas phase reactions (... continued)

| #       | labels   | reaction                                                                         | rate coefficient                           | reference                                      |
|---------|----------|----------------------------------------------------------------------------------|--------------------------------------------|------------------------------------------------|
| G40202b | TrGTerC  | LAPINABO2 + HO <sub>2</sub> → PINAL + HO <sub>2</sub> + OH                       | KR02H02(10)*rchohch2o2_oh                  | Rickard and Pascoe (2009), Taraborrelli (2016) |
| G40203  | TrGTerC  | LAPINABO2 → PINAL + HO <sub>2</sub>                                              | R02*(0.65*k1_R02tOR02+.35*k1_R02sOR02)     | Rickard and Pascoe (2009)*                     |
| G40204  | TrGTerC  | LAPINABOOH + OH → .35 LAPINABO2 + .65 C96CO3                                     | 2.77E-11                                   | Rickard and Pascoe (2009)*                     |
| G40205  | TrGTerCN | LAPINABNO3 + OH → .35 PINAL + .65 C96CO3 + NO <sub>2</sub>                       | 4.29E-12                                   | Rickard and Pascoe (2009)*                     |
| G40206  | TrGTerC  | MENTHEN6ONE + OH → OHMENTHEN6ONEO2                                               | 6.46E-11                                   | Vereecken et al. (2007)*                       |
| G40207  | TrGTerCN | OHMENTHEN6ONEO2 + NO → 2OHMENTHEN6ONE + HO <sub>2</sub> + NO <sub>2</sub>        | KR02N0                                     | Vereecken et al. (2007)*                       |
| G40208  | TrGTerC  | OHMENTHEN6ONEO2 + HO <sub>2</sub> → 2OHMENTHEN6ONE                               | KR02H02(10)                                | Vereecken et al. (2007)                        |
| G40209  | TrGTerC  | OHMENTHEN6ONEO2 → 2OHMENTHEN6ONE + HO <sub>2</sub>                               | k1_R02tOR02                                | Vereecken et al. (2007)                        |
| G40210  | TrGTerC  | 2OHMENTHEN6ONE + OH → 10 LCARBON                                                 | 1E-11                                      | Vereecken et al. (2007)                        |
| G40211  | TrGTerC  | PINAL + OH → .772 C96CO3 + .228 PINALO2                                          | 5.2E-12*EXP(600./TEMP)                     | T. J. Wallington et al. (2014)*                |
| G40212  | TrGTerCN | PINAL + NO <sub>3</sub> → C96CO3 + HNO <sub>3</sub>                              | 2.0E-14                                    | T. J. Wallington et al. (2014)*                |
| G40213a | TrGTerC  | C96CO3 → C96O2 + CO <sub>2</sub>                                                 | k1_R02RC03*0.9                             | Rickard and Pascoe (2009)                      |
| G40213b | TrGTerC  | C96CO3 → PINONIC                                                                 | k1_R02RC03*0.1                             | Rickard and Pascoe (2009)                      |
| G40214a | TrGTerC  | C96CO3 + HO <sub>2</sub> → PERPINONIC                                            | KAPH02*rco3_ooh                            | Rickard and Pascoe (2009)                      |
| G40214b | TrGTerC  | C96CO3 + HO <sub>2</sub> → PINONIC + O <sub>3</sub>                              | KAPH02*rco3_o3                             | Rickard and Pascoe (2009)                      |
| G40214c | TrGTerC  | C96CO3 + HO <sub>2</sub> → C96O2 + OH + CO <sub>2</sub>                          | KAPH02*rco3_oh                             | Rickard and Pascoe (2009)                      |
| G40215  | TrGTerCN | C96CO3 + NO <sub>2</sub> → C10PAN2                                               | k_CH3C03_NO2                               | Rickard and Pascoe (2009)                      |
| G40216  | TrGTerCN | C96CO3 + NO → C96O2 + NO <sub>2</sub> + CO <sub>2</sub>                          | KAPNO                                      | Rickard and Pascoe (2009)                      |
| G40217  | TrGTerCN | C96CO3 + NO <sub>3</sub> → C96O2 + NO <sub>2</sub> + CO <sub>2</sub>             | KR02N03*1.60                               | Rickard and Pascoe (2009)                      |
| G40218  | TrGTerCN | C10PAN2 → C96CO3 + NO <sub>2</sub>                                               | k_PAN_M                                    | Rickard and Pascoe (2009)                      |
| G40219  | TrGTerCN | C10PAN2 + OH → NORPINAL + CO + NO <sub>2</sub>                                   | 3.66E-12                                   | Rickard and Pascoe (2009)                      |
| G40220  | TrGTerC  | PINONIC + OH → C96O2 + CO <sub>2</sub>                                           | 6.65E-12                                   | Rickard and Pascoe (2009)                      |
| G40221  | TrGTerC  | PERPINONIC + OH → C96CO3                                                         | 9.73E-12                                   | Rickard and Pascoe (2009)                      |
| G40222  | TrGTerC  | PINALO2 + HO <sub>2</sub> → PINALOOH                                             | KR02H02(10)                                | Rickard and Pascoe (2009)                      |
| G40223a | TrGTerCN | PINALO2 + NO → C106O2 + NO <sub>2</sub>                                          | KR02N0*(1.-alpha_AN(12,3,0,1,0,temp,cair)) | Rickard and Pascoe (2009), Taraborrelli (2016) |
| G40223b | TrGTerCN | PINALO2 + NO → PINALNO3                                                          | KR02N0*alpha_AN(12,3,0,1,0,temp,cair)      | Rickard and Pascoe (2009), Taraborrelli (2016) |
| G40224  | TrGTerC  | PINALO2 → C106O2                                                                 | k1_R02tR02                                 | Rickard and Pascoe (2009)                      |
| G40225  | TrGTerC  | PINALOOH + OH → PINALO2                                                          | 2.75E-11                                   | Rickard and Pascoe (2009)                      |
| G40226  | TrGTerCN | PINALNO3 + OH → CO235C6CHO + CH <sub>3</sub> COCH <sub>3</sub> + NO <sub>2</sub> | 2.25E-11                                   | Rickard and Pascoe (2009)                      |

Table 1: Gas phase reactions (... continued)

| #       | labels   | reaction                                                                                                                     | rate coefficient                                      | reference                                      |
|---------|----------|------------------------------------------------------------------------------------------------------------------------------|-------------------------------------------------------|------------------------------------------------|
| G40227  | TrGTerC  | $C106O2 + HO_2 \rightarrow C106OOH$                                                                                          | KR02H02(10)                                           | Rickard and Pascoe (2009)                      |
| G40228a | TrGTerCN | $C106O2 + NO \rightarrow C716O2 + CH_3COCH_3 + NO_2$                                                                         | $KR02N0*0.875*(1.-\alpha_{AN}(13,3,0,0,0,temp,cair))$ | Rickard and Pascoe (2009), Taraborrelli (2016) |
| G40228b | TrGTerCN | $C106O2 + NO \rightarrow C106NO3$                                                                                            | $KR02N0*0.875*\alpha_{AN}(13,3,0,0,0,temp,cair)$      | Rickard and Pascoe (2009), Taraborrelli (2016) |
| G40229  | TrGTerC  | $C106O2 \rightarrow C716O2 + CH_3COCH_3$                                                                                     | k1_R02tR02                                            | Rickard and Pascoe (2009)                      |
| G40230  | TrGTerC  | $C106OOH + OH \rightarrow C106O2$                                                                                            | 8.01E-11                                              | Rickard and Pascoe (2009)                      |
| G40231  | TrGTerCN | $C106NO3 + OH \rightarrow CO235C6CHO + CH_3COCH_3 + NO_2$                                                                    | 7.03E-11                                              | Rickard and Pascoe (2009)                      |
| G40232  | TrGTerC  | $APINENE + O_3 \rightarrow .09 APINBOO + .08 PINONIC + .77 OH + .33 NORPINAL + .33 CO + .33 HO_2 + .06 APINAOO + .44 C109O2$ | $8.05E-16*EXP(-640./TEMP)$                            | T. J. Wallington et al. (2014)*                |
| G40233  | TrGTerC  | $APINAOO \rightarrow PINAL + H_2O_2$                                                                                         | $1.00E-17*c(ind_H2O)$                                 | Rickard and Pascoe (2009)                      |
| G40234  | TrGTerC  | $APINAOO + CO \rightarrow PINAL + CO_2$                                                                                      | 1.20E-15                                              | Rickard and Pascoe (2009)                      |
| G40235  | TrGTerCN | $APINAOO + NO \rightarrow PINAL + NO_2$                                                                                      | 1.00E-14                                              | Rickard and Pascoe (2009)                      |
| G40236  | TrGTerCN | $APINAOO + NO_2 \rightarrow PINAL + NO_3$                                                                                    | 1.00E-15                                              | Rickard and Pascoe (2009)                      |
| G40237a | TrGTerC  | $APINBOO \rightarrow PINONIC$                                                                                                | $1.00E-17*c(ind_H2O)*(0.08+0.15)$                     | Rickard and Pascoe (2009)                      |
| G40237b | TrGTerC  | $APINBOO \rightarrow PINAL + H_2O_2$                                                                                         | $1.00E-17*c(ind_H2O)*0.77$                            | Rickard and Pascoe (2009)                      |
| G40238  | TrGTerC  | $APINBOO + CO \rightarrow PINAL + CO_2$                                                                                      | 1.20E-15                                              | Rickard and Pascoe (2009)                      |
| G40239  | TrGTerCN | $APINBOO + NO \rightarrow PINAL + NO_2$                                                                                      | 1.00E-14                                              | Rickard and Pascoe (2009)                      |
| G40240  | TrGTerCN | $APINBOO + NO_2 \rightarrow PINAL + NO_3$                                                                                    | 1.00E-15                                              | Rickard and Pascoe (2009)                      |
| G40241  | TrGTerC  | $C109O2 \rightarrow C89CO3 + HCHO$                                                                                           | k1_R02p0R02                                           | Rickard and Pascoe (2009)                      |
| G40242  | TrGTerCN | $C109O2 + NO \rightarrow C89CO3 + HCHO + NO_2$                                                                               | KR02N0                                                | Rickard and Pascoe (2009)*                     |
| G40243a | TrGTerC  | $C109O2 + HO_2 \rightarrow C109OOH$                                                                                          | $KR02H02(10)*rcoch2o2_ooH$                            | Rickard and Pascoe (2009), Taraborrelli (2016) |
| G40243b | TrGTerC  | $C109O2 + HO_2 \rightarrow C89CO3 + HCHO + OH$                                                                               | $KR02H02(10)*rcoch2o2_oh$                             | Rickard and Pascoe (2009), Taraborrelli (2016) |
| G40244  | TrGTerC  | $C109OOH + OH \rightarrow C109CO + OH$                                                                                       | 5.47E-11                                              | Rickard and Pascoe (2009)                      |
| G40245  | TrGTerC  | $C109CO + OH \rightarrow C89CO3 + CO$                                                                                        | 5.47E-11                                              | Rickard and Pascoe (2009)                      |
| G40246  | TrGTerCN | $APINENE + NO_3 \rightarrow LNAPINABO2$                                                                                      | $1.2E-12*EXP(490./temp)$                              | T. J. Wallington et al. (2014)*                |
| G40247  | TrGTerCN | $LNAPINABO2 \rightarrow PINAL + NO_2$                                                                                        | $(0.65*k1_R02tR02 + 0.35*k1_R02sR02)$                 | Rickard and Pascoe (2009)                      |
| G40248  | TrGTerCN | $LNAPINABO2 + NO \rightarrow PINAL + NO_2 + NO_2$                                                                            | KR02N0                                                | Rickard and Pascoe (2009)*                     |
| G40249  | TrGTerCN | $LNAPINABO2 + HO_2 \rightarrow LNAPINABOOH$                                                                                  | KR02H02(10)                                           | Rickard and Pascoe (2009)                      |
| G40250  | TrGTerCN | $LNAPINABO2 + NO_3 \rightarrow PINAL + NO_2 + NO_2$                                                                          | KR02N03                                               | Rickard and Pascoe (2009)                      |
| G40251  | TrGTerCN | $LNAPINABOOH + OH \rightarrow LNAPINABO2$                                                                                    | $(.65*6.87E-12+.35*1.23E-11)$                         | Rickard and Pascoe (2009)                      |

Table 1: Gas phase reactions (... continued)

| #       | labels   | reaction                                                                                                | rate coefficient                                              | reference                                         |
|---------|----------|---------------------------------------------------------------------------------------------------------|---------------------------------------------------------------|---------------------------------------------------|
| G40252a | TrGTerC  | BPINENE + OH → BPINAO2                                                                                  | 1.47E-11*EXP(467./TEMP)<br>*(0.8326*0.3+0.068)/(0.8326+0.068) | Gill and Hites (2002)*                            |
| G40252b | TrGTerC  | BPINENE + OH → ROO6R1O2                                                                                 | 1.47E-11*EXP(467./TEMP)<br>*0.8326*0.7/(0.8326+0.068)         | Gill and Hites (2002)*                            |
| G40253a | TrGTerC  | BPINAO2 + HO <sub>2</sub> → BPINAOOH                                                                    | KR02H02(10)*rcoch2o2_ooH                                      | Rickard and Pascoe (2009),<br>Taraborrelli (2016) |
| G40253b | TrGTerC  | BPINAO2 + HO <sub>2</sub> → NOPINONE + HCHO + HO <sub>2</sub> + OH                                      | KR02H02(10)*rcoch2o2_oh                                       | Rickard and Pascoe (2009),<br>Taraborrelli (2016) |
| G40254a | TrGTerCN | BPINAO2 + NO → NOPINONE + HCHO + HO <sub>2</sub> + NO <sub>2</sub>                                      | KR02N0*(1.-alpha_AN(11,3,0,0,0,<br>temp, cair))               | Rickard and Pascoe (2009),<br>Taraborrelli (2016) |
| G40254b | TrGTerCN | BPINAO2 + NO → BPINANO3                                                                                 | KR02N0*alpha_AN(11,3,0,0,0,<br>temp, cair)                    | Rickard and Pascoe (2009),<br>Taraborrelli (2016) |
| G40255  | TrGTerC  | BPINAO2 → NOPINONE + HCHO + HO <sub>2</sub>                                                             | k1_R02t0R02                                                   | Rickard and Pascoe (2009)                         |
| G40256  | TrGTerC  | BPINAOOH + OH → BPINAO2                                                                                 | 1.33E-11                                                      | Rickard and Pascoe (2009)                         |
| G40257  | TrGTerCN | BPINANO3 + OH → NOPINONE + HCHO + NO <sub>2</sub>                                                       | 4.70E-12                                                      | Rickard and Pascoe (2009)                         |
| G40258a | TrGTerCN | ROO6R1O2 + NO → ROO6R3O2 + CH <sub>3</sub> COCH <sub>3</sub> + NO <sub>2</sub>                          | KR02N0*(1.-alpha_AN(13,3,0,0,0,<br>temp, cair))               | Vereecken and Peeters (2012)                      |
| G40258b | TrGTerCN | ROO6R1O2 + NO → ROO6R1NO3                                                                               | KR02N0*alpha_AN(13,3,0,0,0,<br>temp, cair)                    | Vereecken and Peeters (2012)                      |
| G40259  | TrGTerC  | ROO6R1O2 + HO <sub>2</sub> → 10 LCARBON                                                                 | KR02H02(10)                                                   | Vereecken and Peeters (2012)*                     |
| G40260  | TrGTerC  | ROO6R1O2 → ROO6R3O2 + CH <sub>3</sub> COCH <sub>3</sub>                                                 | k1_R02t0R02                                                   | Vereecken and Peeters (2012)                      |
| G40261a | TrGTerCN | RO6R1O2 + NO → RO6R3O2 + NO <sub>2</sub>                                                                | KR02N0*(1.-alpha_AN(12,3,0,0,0,<br>temp, cair))               | Vereecken and Peeters (2012)                      |
| G40261b | TrGTerCN | RO6R1O2 + NO → RO6R1NO3                                                                                 | KR02N0*alpha_AN(12,3,0,0,0,<br>temp, cair)                    | Vereecken and Peeters (2012)                      |
| G40262  | TrGTerC  | RO6R1O2 + HO <sub>2</sub> → 10 LCARBON                                                                  | KR02H02(10)                                                   | Vereecken and Peeters (2012)*                     |
| G40263  | TrGTerC  | RO6R1O2 → RO6R3O2                                                                                       | k1_R02s0R02                                                   | Vereecken and Peeters (2012)                      |
| G40264a | TrGTerCN | RO6R3O2 + NO → 9 LCARBON + HCHO + HO <sub>2</sub> + NO <sub>2</sub>                                     | KR02N0*(1.-alpha_AN(12,3,0,0,0,<br>temp, cair))               | Vereecken and Peeters (2012)                      |
| G40264b | TrGTerCN | RO6R3O2 + NO → 10 LCARBON + LNITROGEN                                                                   | KR02N0*alpha_AN(12,3,0,0,0,<br>temp, cair)                    | Vereecken and Peeters (2012)                      |
| G40265  | TrGTerC  | RO6R3O2 + HO <sub>2</sub> → 10 LCARBON                                                                  | KR02H02(10)                                                   | Vereecken and Peeters (2012)                      |
| G40266  | TrGTerC  | RO6R3O2 → 9 LCARBON + HCHO + HO <sub>2</sub>                                                            | k1_R02sR02                                                    | Vereecken and Peeters (2012)*                     |
| G40267a | TrGTerC  | BPINENE + O <sub>3</sub> → NOPINONE + .63 CO + .37 CH <sub>2</sub> OO<br>+ .16 OH + .16 HO <sub>2</sub> | 1.35E-15*EXP(-1270./TEMP)<br>*.051/(1-.027)                   | T. J. Wallington et al. (2014)*                   |

Table 1: Gas phase reactions (... continued)

| #       | labels   | reaction                                                                           | rate coefficient                                   | reference                                            |
|---------|----------|------------------------------------------------------------------------------------|----------------------------------------------------|------------------------------------------------------|
| G40267b | TrGTerC  | BPINENE + O <sub>3</sub> → NOPINOO + CO <sub>2</sub>                               | 1.35E-15*EXP(-1270./TEMP)<br>*.368/(1-.027)        | Nguyen et al. (2009), T. J. Wallington et al. (2014) |
| G40267c | TrGTerC  | BPINENE + O <sub>3</sub> → NOPINDO2 + CO <sub>2</sub> + OH                         | 1.35E-15*EXP(-1270./TEMP)<br>*.283/(1-.027)        | Nguyen et al. (2009), T. J. Wallington et al. (2014) |
| G40267d | TrGTerC  | BPINENE + O <sub>3</sub> → C8BC + 2 CO <sub>2</sub>                                | 1.35E-15*EXP(-1270./TEMP)<br>*(.104+.167)/(1-.027) | Nguyen et al. (2009), T. J. Wallington et al. (2014) |
| G40268  | TrGTerCN | BPINENE + NO <sub>3</sub> → LNBPINABO2                                             | 2.51E-12                                           | T. J. Wallington et al. (2014)*                      |
| G40269  | TrGTerCN | LNBPINABO2 + HO <sub>2</sub> → LNBPINABOOH                                         | KR02H02(10)                                        | Rickard and Pascoe (2009)                            |
| G40270  | TrGTerCN | LNBPINABO2 + NO → NOPINONE + HCHO + NO <sub>2</sub> + NO <sub>2</sub>              | KR02N0                                             | Rickard and Pascoe (2009)*                           |
| G40271  | TrGTerCN | LNBPINABO2 + NO <sub>3</sub> → NOPINONE + HCHO + NO <sub>2</sub> + NO <sub>2</sub> | KR02N03                                            | Rickard and Pascoe (2009)                            |
| G40272a | TrGTerCN | LNBPINABO2 → NOPINONE + HCHO + NO <sub>2</sub>                                     | k1_R02tR02*0.7                                     | Rickard and Pascoe (2009)                            |
| G40272b | TrGTerCN | LNBPINABO2 → BPINANO3                                                              | k1_R02tR02*0.3                                     | Rickard and Pascoe (2009)                            |
| G40273  | TrGTerCN | LNBPINABOOH + OH → LNBPINABO2                                                      | 9.58E-12                                           | Rickard and Pascoe (2009)                            |
| G40274  | TrGTerCN | ROO6R1NO3 + OH → ROO6R3O2 + CH <sub>3</sub> COCH <sub>3</sub> + NO <sub>2</sub>    | 9.16E-13                                           | Vereecken and Peeters (2012), Gill and Hites (2002)* |
| G40275  | TrGTerCN | RO6R1NO3 + OH → 9 LCARBON + HCHO + HO <sub>2</sub> + NO <sub>2</sub>               | 9.16E-13                                           | Vereecken and Peeters (2012), Gill and Hites (2002)  |
| G40276  | TrGTerC  | PINEOL + OH → HCOOH + OH + NORPINAL                                                | k_CH2CHOH_OH_HCOOH                                 | Taraborrelli (2016), So et al. (2014)*               |
| G40277  | TrGTerC  | PINEOL + HCOOH → PINAL + HCOOH                                                     | k_CH2CHOH_HCOOH                                    | Taraborrelli (2016), daSilva (2010)*                 |
| G40278  | TrGTerC  | PINAL + HCOOH → PINEOL + HCOOH                                                     | k_ALD_HCOOH                                        | Taraborrelli (2016), daSilva (2010)*                 |
| G40279a | TrGC     | CARENE + OH → LAPINABO2                                                            | 8.7E-11*(.50+.25)                                  | Wolfe et al. (2011), Taraborrelli (2016)             |
| G40279b | TrGC     | CARENE + OH → MENTHEN6ONE + HO <sub>2</sub>                                        | 8.7E-11*.25*.60                                    | Wolfe et al. (2011), Taraborrelli (2016)             |
| G40279c | TrGC     | CARENE + OH → ROO6R1O2                                                             | 8.7E-11*.25*.40                                    | Wolfe et al. (2011), Taraborrelli (2016)             |
| G40280a | TrGC     | CARENE + O <sub>3</sub> → APINBOO                                                  | 2.E-16*.50*.18                                     | Wolfe et al. (2011), Taraborrelli (2016)             |
| G40280b | TrGC     | CARENE + O <sub>3</sub> → PINONIC                                                  | 2.E-16*.50*.16                                     | Wolfe et al. (2011), Taraborrelli (2016)             |

Table 1: Gas phase reactions (... continued)

| #       | labels   | reaction                                                                                                 | rate coefficient                                              | reference                                            |
|---------|----------|----------------------------------------------------------------------------------------------------------|---------------------------------------------------------------|------------------------------------------------------|
| G40280c | TrGC     | CARENE + O <sub>3</sub> → OH + NORPINAL + CO + HO <sub>2</sub>                                           | 2.E-16*.50*.66                                                | Wolfe et al. (2011), Taraborrelli (2016)             |
| G40280d | TrGC     | CARENE + O <sub>3</sub> → APINAOO                                                                        | 2.E-16*.50*.12                                                | Wolfe et al. (2011), Taraborrelli (2016)             |
| G40280e | TrGC     | CARENE + O <sub>3</sub> → OH + C109O2                                                                    | 2.E-16*.50*(.22+.66)                                          | Wolfe et al. (2011), Taraborrelli (2016)             |
| G40281  | TrGCN    | CARENE + NO <sub>3</sub> → LNAPINABO2                                                                    | 9.5E-12                                                       | Wolfe et al. (2011), Taraborrelli (2016)             |
| G40282a | TrGTerC  | SABINENE + OH → BPINAO2                                                                                  | 1.47E-11*EXP(467./TEMP)<br>*(0.8326*0.3+0.068)/(0.8326+0.068) | Gill and Hites (2002)*                               |
| G40282b | TrGTerC  | SABINENE + OH → ROO6R1O2                                                                                 | 1.47E-11*EXP(467./TEMP)<br>*0.8326*0.7/(0.8326+0.068)         | Vereecken and Peeters (2012), Gill and Hites (2002)* |
| G40283a | TrGTerC  | SABINENE + O <sub>3</sub> → NOPINONE + .63 CO + .37 HOCH <sub>2</sub> OOH + .16 OH + .16 HO <sub>2</sub> | 1.35E-15*EXP(-1270./TEMP)<br>*.051/(1-.027)                   | T. J. Wallington et al. (2014)*                      |
| G40283b | TrGTerC  | SABINENE + O <sub>3</sub> → NOPINOO + CO <sub>2</sub>                                                    | 1.35E-15*EXP(-1270./TEMP)<br>*.368/(1-.027)                   | Nguyen et al. (2009), T. J. Wallington et al. (2014) |
| G40283c | TrGTerC  | SABINENE + O <sub>3</sub> → NOPINDO2 + CO <sub>2</sub> + OH                                              | 1.35E-15*EXP(-1270./TEMP)<br>*.283/(1-.027)                   | Nguyen et al. (2009), T. J. Wallington et al. (2014) |
| G40283d | TrGTerC  | SABINENE + O <sub>3</sub> → C8BC + 2 CO <sub>2</sub>                                                     | 1.35E-15*EXP(-1270./TEMP)<br>*(.104+.167)/(1-.027)            | Nguyen et al. (2009), T. J. Wallington et al. (2014) |
| G40284  | TrGTerCN | SABINENE + NO <sub>3</sub> → LNBPINABO2                                                                  | 2.51E-12                                                      | T. J. Wallington et al. (2014)*                      |
| G40285a | TrGTerC  | CAMPHENE + OH → BPINAO2                                                                                  | 1.47E-11*EXP(467./TEMP)<br>*(0.8326*0.3+0.068)/(0.8326+0.068) | Gill and Hites (2002)*                               |
| G40285b | TrGTerC  | CAMPHENE + OH → ROO6R1O2                                                                                 | 1.47E-11*EXP(467./TEMP)<br>*0.8326*0.7/(0.8326+0.068)         | Vereecken and Peeters (2012), Gill and Hites (2002)* |
| G40286a | TrGTerC  | CAMPHENE + O <sub>3</sub> → NOPINONE + .63 CO + .37 HOCH <sub>2</sub> OOH + .16 OH + .16 HO <sub>2</sub> | 1.35E-15*EXP(-1270./TEMP)<br>*.051/(1-.027)                   | T. J. Wallington et al. (2014)*                      |
| G40286b | TrGTerC  | CAMPHENE + O <sub>3</sub> → NOPINOO + CO <sub>2</sub>                                                    | 1.35E-15*EXP(-1270./TEMP)<br>*.368/(1-.027)                   | Nguyen et al. (2009), T. J. Wallington et al. (2014) |
| G40286c | TrGTerC  | CAMPHENE + O <sub>3</sub> → NOPINDO2 + CO <sub>2</sub> + OH                                              | 1.35E-15*EXP(-1270./TEMP)<br>*.283/(1-.027)                   | Nguyen et al. (2009), T. J. Wallington et al. (2014) |
| G40286d | TrGTerC  | CAMPHENE + O <sub>3</sub> → C8BC + 2 CO <sub>2</sub>                                                     | 1.35E-15*EXP(-1270./TEMP)<br>*(.104+.167)/(1-.027)            | Nguyen et al. (2009), T. J. Wallington et al. (2014) |
| G40287  | TrGTerCN | CAMPHENE + NO <sub>3</sub> → LNBPINABO2                                                                  | 2.51E-12                                                      | T. J. Wallington et al. (2014)*                      |

Table 1: Gas phase reactions (... continued)

| #      | labels     | reaction                                                                                                   | rate coefficient                                       | reference                                     |
|--------|------------|------------------------------------------------------------------------------------------------------------|--------------------------------------------------------|-----------------------------------------------|
| G40400 | TrGAroC    | LHAROM + OH → .14 TLEPOXMUC + .03 C6H5CH2O2 + .04 CRESOL + .79 TLBIPERO2 + .18 HO <sub>2</sub> + 4 LCARBON | 5.67E-11                                               | Rickard and Pascoe (2009)*                    |
| G40401 | TrGAroCN   | LHAROM + NO <sub>3</sub> → C6H5CH2O2 + HNO <sub>3</sub> + 4 LCARBON                                        | 2.60E-15                                               | Rickard and Pascoe (2009)*                    |
| G6100  | UpStTrGCl  | Cl + O <sub>3</sub> → ClO + O <sub>2</sub>                                                                 | 2.8E-11*EXP(-250./temp)                                | Atkinson et al. (2007)                        |
| G6101  | UpStGCl    | ClO + O( <sup>3</sup> P) → Cl + O <sub>2</sub>                                                             | 2.5E-11*EXP(110./temp)                                 | Atkinson et al. (2007)                        |
| G6102a | StTrGCl    | ClO + ClO → Cl <sub>2</sub> + O <sub>2</sub>                                                               | 1.0E-12*EXP(-1590./temp)                               | Atkinson et al. (2007)                        |
| G6102b | StTrGCl    | ClO + ClO → 2 Cl + O <sub>2</sub>                                                                          | 3.0E-11*EXP(-2450./temp)                               | Atkinson et al. (2007)                        |
| G6102c | StTrGCl    | ClO + ClO → Cl + OClO                                                                                      | 3.5E-13*EXP(-1370./temp)                               | Atkinson et al. (2007)                        |
| G6102d | StTrGCl    | ClO + ClO → Cl <sub>2</sub> O <sub>2</sub>                                                                 | k_C10_C10                                              | Atkinson et al. (2007)                        |
| G6103  | StTrGCl    | Cl <sub>2</sub> O <sub>2</sub> → ClO + ClO                                                                 | k_C10_C10/(1.72E-27*EXP(8649./temp))                   | Atkinson et al. (2007), Sander et al. (2011)* |
| G6200  | StGCl      | Cl + H <sub>2</sub> → HCl + H                                                                              | 3.9E-11*EXP(-2310./temp)                               | Atkinson et al. (2007)                        |
| G6201a | StGCl      | Cl + HO <sub>2</sub> → HCl + O <sub>2</sub>                                                                | 4.4E-11-7.5E-11*EXP(-620./temp)                        | Atkinson et al. (2007)                        |
| G6201b | StGCl      | Cl + HO <sub>2</sub> → ClO + OH                                                                            | 7.5E-11*EXP(-620./temp)                                | Atkinson et al. (2007)                        |
| G6202  | StTrGCl    | Cl + H <sub>2</sub> O <sub>2</sub> → HCl + HO <sub>2</sub>                                                 | 1.1E-11*EXP(-980./temp)                                | Atkinson et al. (2007)                        |
| G6203  | StGCl      | ClO + OH → .94 Cl + .94 HO <sub>2</sub> + .06 HCl + .06 O <sub>2</sub>                                     | 7.3E-12*EXP(300./temp)                                 | Atkinson et al. (2007)                        |
| G6204  | StTrGCl    | ClO + HO <sub>2</sub> → HOCl + O <sub>2</sub>                                                              | 2.2E-12*EXP(340./temp)                                 | Atkinson et al. (2007)*                       |
| G6205  | StTrGCl    | HCl + OH → Cl + H <sub>2</sub> O                                                                           | 1.7E-12*EXP(-230./temp)                                | Atkinson et al. (2007)                        |
| G6206  | StGCl      | HOCl + OH → ClO + H <sub>2</sub> O                                                                         | 3.0E-12*EXP(-500./temp)                                | Sander et al. (2011)                          |
| G6300  | UpStTrGCIN | ClO + NO → NO <sub>2</sub> + Cl                                                                            | 6.2E-12*EXP(295./temp)                                 | Atkinson et al. (2007)                        |
| G6301  | StTrGCIN   | ClO + NO <sub>2</sub> → ClNO <sub>3</sub>                                                                  | k_3rd_iupac(temp, cair, 1.6E-31, 3.4, 7.E-11, 0., 0.4) | Atkinson et al. (2007)                        |
| G6302  | TrGCIN     | ClNO <sub>3</sub> → ClO + NO <sub>2</sub>                                                                  | 6.918E-7*EXP(-10909./temp)*cair                        | Anderson and Fahey (1990)                     |
| G6303  | StGCIN     | ClNO <sub>3</sub> + O( <sup>3</sup> P) → ClO + NO <sub>3</sub>                                             | 4.5E-12*EXP(-900./temp)                                | Atkinson et al. (2007)                        |
| G6304  | StTrGCIN   | ClNO <sub>3</sub> + Cl → Cl <sub>2</sub> + NO <sub>3</sub>                                                 | 6.2E-12*EXP(145./temp)                                 | Atkinson et al. (2007)                        |
| G6400  | StTrGCl    | Cl + CH <sub>4</sub> → HCl + CH <sub>3</sub>                                                               | 6.6E-12*EXP(-1240./temp)                               | Atkinson et al. (2006)                        |
| G6401  | StTrGCl    | Cl + HCHO → HCl + CO + HO <sub>2</sub>                                                                     | 8.1E-11*EXP(-34./temp)                                 | Atkinson et al. (2006)                        |
| G6402  | StTrGCl    | Cl + CH <sub>3</sub> OOH → HCHO + HCl + OH                                                                 | 5.9E-11                                                | Atkinson et al. (2006)*                       |
| G6403  | StTrGCl    | ClO + CH <sub>3</sub> O <sub>2</sub> → HO <sub>2</sub> + Cl + HCHO                                         | 3.3E-12*EXP(-115./temp)                                | Sander et al. (2011)                          |
| G6404  | StGCl      | CCL <sub>4</sub> + O( <sup>1</sup> D) → LCARBON + ClO + 3 Cl                                               | 3.3E-10                                                | Sander et al. (2011)                          |
| G6405  | StGCl      | CH <sub>3</sub> Cl + O( <sup>1</sup> D) → LCARBON + OH + Cl                                                | 1.65E-10                                               | see note*                                     |
| G6406  | StGCl      | CH <sub>3</sub> Cl + OH → LCARBON + H <sub>2</sub> O + Cl                                                  | 2.4E-12*EXP(-1250./temp)                               | Sander et al. (2011)                          |
| G6407  | StGCCl     | CH <sub>3</sub> CCl <sub>3</sub> + O( <sup>1</sup> D) → 2 LCARBON + OH + 3 Cl                              | 3.E-10                                                 | see note*                                     |

Table 1: Gas phase reactions (... continued)

| #      | labels   | reaction                                                                                                                         | rate coefficient                                                                                                                      | reference                                                          |
|--------|----------|----------------------------------------------------------------------------------------------------------------------------------|---------------------------------------------------------------------------------------------------------------------------------------|--------------------------------------------------------------------|
| G6408  | StTrGCCl | $\text{CH}_3\text{CCl}_3 + \text{OH} \rightarrow 2 \text{LCARBON} + \text{H}_2\text{O} + 3 \text{Cl}$                            | $1.64\text{E}-12*\text{EXP}(-1520./\text{temp})$                                                                                      | Sander et al. (2011)                                               |
| G6409  | TrGCCl   | $\text{Cl} + \text{C}_2\text{H}_4 \rightarrow \text{HOCH}_2\text{CH}_2\text{O}_2 + \text{HCl}$                                   | $k\_3\text{rd\_iupac}(\text{temp}, \text{cair}, 1.85\text{E}-29, 3.3, 6.0\text{E}-10, 0.0, 0.4)$                                      | Atkinson et al. (2006)*                                            |
| G6410  | TrGCCl   | $\text{Cl} + \text{CH}_3\text{CHO} \rightarrow \text{HCl} + \text{CH}_3\text{C}(\text{O})$                                       | $8.0\text{e}-11$                                                                                                                      | Atkinson et al. (2006)                                             |
| G6411  | TrGCCl   | $\text{C}_2\text{H}_2 + \text{Cl} \rightarrow \text{LCARBON} + \text{CH}_3 + \text{HCl}$                                         | $k\_3\text{rd\_iupac}(\text{temp}, \text{cair}, 6.1\text{e}-30, 3.0, 2.0\text{e}-10, 0., 0.6)$                                        | Atkinson et al. (2006)                                             |
| G6412  | TrGCCl   | $\text{C}_2\text{H}_6 + \text{Cl} \rightarrow \text{C}_2\text{H}_5\text{O}_2 + \text{HCl}$                                       | $8.3\text{E}-11*\text{EXP}(-100./\text{temp})$                                                                                        | Atkinson et al. (2006)                                             |
| G6413  | StTrGCIN | $\text{Cl} + \text{CH}_3\text{ONO}_2 \rightarrow \text{HCl} + \text{HCHO} + \text{NO}_2$                                         | $1.3\text{E}-11*\text{EXP}(-1200./\text{temp})$                                                                                       | Sander et al. (2011)                                               |
| G6414  | StTrGCIN | $\text{Cl} + \text{CH}_3\text{ONO} \rightarrow \text{HCl} + \text{HCHO} + \text{NO}$                                             | $2.1\text{E}-12$                                                                                                                      | Sokolov et al. (1999)                                              |
| G6415  | StTrGCl  | $\text{Cl} + \text{CH}_3\text{O}_2 \rightarrow .5 \text{ClO} + .5 \text{CH}_3\text{O} + .5 \text{HCl} + .5 \text{CH}_2\text{OO}$ | $1.6\text{E}-10$                                                                                                                      | Sander et al. (2011)                                               |
| G6416  | TrGCCIN  | $\text{Cl} + \text{CH}_3\text{CN} \rightarrow \text{NCCH}_2\text{O}_2 + \text{HCl}$                                              | $1.6\text{E}-11*\text{EXP}(-2104./\text{temp})$                                                                                       | Tyndall et al. (1996), Tyndall et al. (2001b), Taraborrelli (2016) |
| G6500  | StGCIF   | $\text{CF}_2\text{Cl}_2 + \text{O}(^1\text{D}) \rightarrow \text{LCARBON} + 2 \text{LFLUORINE} + \text{ClO} + \text{Cl}$         | $1.4\text{E}-10$                                                                                                                      | Sander et al. (2011)                                               |
| G6501  | StGCIF   | $\text{CFCl}_3 + \text{O}(^1\text{D}) \rightarrow \text{LCARBON} + \text{LFLUORINE} + \text{ClO} + 2 \text{Cl}$                  | $2.3\text{E}-10$                                                                                                                      | Sander et al. (2011)                                               |
| G7100  | StTrGBr  | $\text{Br} + \text{O}_3 \rightarrow \text{BrO} + \text{O}_2$                                                                     | $1.7\text{E}-11*\text{EXP}(-800./\text{temp})$                                                                                        | Atkinson et al. (2007)                                             |
| G7101  | StGBr    | $\text{BrO} + \text{O}(^3\text{P}) \rightarrow \text{Br} + \text{O}_2$                                                           | $1.9\text{E}-11*\text{EXP}(230./\text{temp})$                                                                                         | Atkinson et al. (2007)                                             |
| G7102a | StTrGBr  | $\text{BrO} + \text{BrO} \rightarrow 2 \text{Br} + \text{O}_2$                                                                   | $2.7\text{E}-12$                                                                                                                      | Atkinson et al. (2007)                                             |
| G7102b | StTrGBr  | $\text{BrO} + \text{BrO} \rightarrow \text{Br}_2 + \text{O}_2$                                                                   | $2.9\text{E}-14*\text{EXP}(840./\text{temp})$                                                                                         | Atkinson et al. (2007)                                             |
| G7200  | StTrGBr  | $\text{Br} + \text{HO}_2 \rightarrow \text{HBr} + \text{O}_2$                                                                    | $7.7\text{E}-12*\text{EXP}(-450./\text{temp})$                                                                                        | Atkinson et al. (2007)                                             |
| G7201  | StTrGBr  | $\text{BrO} + \text{HO}_2 \rightarrow \text{HOBr} + \text{O}_2$                                                                  | $4.5\text{E}-12*\text{EXP}(500./\text{temp})$                                                                                         | Atkinson et al. (2007)                                             |
| G7202  | StTrGBr  | $\text{HBr} + \text{OH} \rightarrow \text{Br} + \text{H}_2\text{O}$                                                              | $6.7\text{E}-12*\text{EXP}(155./\text{temp})$                                                                                         | Atkinson et al. (2007)                                             |
| G7203  | StGBr    | $\text{HOBr} + \text{O}(^3\text{P}) \rightarrow \text{OH} + \text{BrO}$                                                          | $1.2\text{E}-10*\text{EXP}(-430./\text{temp})$                                                                                        | Atkinson et al. (2007)                                             |
| G7204  | StTrGBr  | $\text{Br}_2 + \text{OH} \rightarrow \text{HOBr} + \text{Br}$                                                                    | $2.0\text{E}-11*\text{EXP}(240./\text{temp})$                                                                                         | Atkinson et al. (2007)                                             |
| G7300  | TrGBrN   | $\text{Br} + \text{BrNO}_3 \rightarrow \text{Br}_2 + \text{NO}_3$                                                                | $4.9\text{E}-11$                                                                                                                      | Orlando and Tyndall (1996)                                         |
| G7301  | StTrGBrN | $\text{BrO} + \text{NO} \rightarrow \text{Br} + \text{NO}_2$                                                                     | $8.7\text{E}-12*\text{EXP}(260./\text{temp})$                                                                                         | Atkinson et al. (2007)                                             |
| G7302  | StTrGBrN | $\text{BrO} + \text{NO}_2 \rightarrow \text{BrNO}_3$                                                                             | $k\_Br0\_NO2$                                                                                                                         | Atkinson et al. (2007)*                                            |
| G7303  | TrGBrN   | $\text{BrNO}_3 \rightarrow \text{BrO} + \text{NO}_2$                                                                             | $k\_Br0\_NO2/(5.44\text{E}-9*\text{EXP}(14192./\text{temp})*1.\text{E}6*\text{R\_gas}*\text{temp}/(\text{atm}2\text{Pa}*\text{N}_A))$ | Orlando and Tyndall (1996), Atkinson et al. (2007)*                |
| G7400  | StTrGBr  | $\text{Br} + \text{HCHO} \rightarrow \text{HBr} + \text{CO} + \text{HO}_2$                                                       | $7.7\text{E}-12*\text{EXP}(-580./\text{temp})$                                                                                        | Atkinson et al. (2006)                                             |
| G7401  | TrGBr    | $\text{Br} + \text{CH}_3\text{OOH} \rightarrow \text{CH}_3\text{O}_2 + \text{HBr}$                                               | $2.6\text{E}-12*\text{EXP}(-1600./\text{temp})$                                                                                       | Kondo and Benson (1984)                                            |
| G7402  | TrGBr    | $\text{BrO} + \text{CH}_3\text{O}_2 \rightarrow \text{HOBr} + \text{CH}_2\text{OO}$                                              | $2.42\text{E}-14*\text{EXP}(1617./\text{temp})$                                                                                       | Shallcross et al. (2015)                                           |

Table 1: Gas phase reactions (... continued)

| #      | labels    | reaction                                                                                                               | rate coefficient                                                                                                                    | reference                 |
|--------|-----------|------------------------------------------------------------------------------------------------------------------------|-------------------------------------------------------------------------------------------------------------------------------------|---------------------------|
| G7403  | StTrGBr   | $\text{CH}_3\text{Br} + \text{OH} \rightarrow \text{LCARBON} + \text{H}_2\text{O} + \text{Br}$                         | $2.35\text{E-}12 * \text{EXP}(-1300./\text{temp})$                                                                                  | Sander et al. (2011)      |
| G7404  | TrGBrC    | $\text{Br} + \text{C}_2\text{H}_4 \rightarrow \text{HOCH}_2\text{CH}_2\text{O}_2 + \text{HBr}$                         | $2.8\text{E-}13 * \text{EXP}(224./\text{temp}) / (1. + 1.13\text{E}24 * \text{EXP}(-3200./\text{temp}) / \text{C}(\text{ind\_O2}))$ | Atkinson et al. (2006)*   |
| G7405  | TrGBrC    | $\text{Br} + \text{CH}_3\text{CHO} \rightarrow \text{HBr} + \text{CH}_3\text{C}(\text{O})$                             | $1.8\text{E-}11 * \text{EXP}(-460./\text{temp})$                                                                                    | Atkinson et al. (2006)    |
| G7406  | TrGBrC    | $\text{Br} + \text{C}_2\text{H}_2 \rightarrow \text{LCARBON} + \text{CH}_3\text{O}_2 + \text{HBr}$                     | $6.35\text{E-}15 * \text{EXP}(440./\text{temp})$                                                                                    | Atkinson et al. (2006)    |
| G7407  | TrGBr     | $\text{CHBr}_3 + \text{OH} \rightarrow \text{LCARBON} + \text{H}_2\text{O} + 3 \text{ Br}$                             | $1.35\text{E-}12 * \text{EXP}(-600./\text{temp})$                                                                                   | Sander et al. (2011)*     |
| G7408  | TrGBr     | $\text{CH}_2\text{Br}_2 + \text{OH} \rightarrow \text{LCARBON} + \text{H}_2\text{O} + 2 \text{ Br}$                    | $2.0\text{E-}12 * \text{EXP}(-840./\text{temp})$                                                                                    | Sander et al. (2011)*     |
| G7600  | TrGBrCl   | $\text{Br} + \text{BrCl} \rightarrow \text{Br}_2 + \text{Cl}$                                                          | $3.32\text{E-}15$                                                                                                                   | Manion et al. (2010)      |
| G7601  | TrGBrCl   | $\text{Br} + \text{Cl}_2 \rightarrow \text{BrCl} + \text{Cl}$                                                          | $1.10\text{E-}15$                                                                                                                   | Dolson and Leone (1987)   |
| G7602  | TrGBrCl   | $\text{Br}_2 + \text{Cl} \rightarrow \text{BrCl} + \text{Br}$                                                          | $2.3\text{E-}10 * \text{EXP}(135./\text{temp})$                                                                                     | Bedjanian et al. (1998)   |
| G7603a | StTrGBrCl | $\text{BrO} + \text{ClO} \rightarrow \text{Br} + \text{OCIO}$                                                          | $1.6\text{E-}12 * \text{EXP}(430./\text{temp})$                                                                                     | Atkinson et al. (2007)    |
| G7603b | StTrGBrCl | $\text{BrO} + \text{ClO} \rightarrow \text{Br} + \text{Cl} + \text{O}_2$                                               | $2.9\text{E-}12 * \text{EXP}(220./\text{temp})$                                                                                     | Atkinson et al. (2007)    |
| G7603c | StTrGBrCl | $\text{BrO} + \text{ClO} \rightarrow \text{BrCl} + \text{O}_2$                                                         | $5.8\text{E-}13 * \text{EXP}(170./\text{temp})$                                                                                     | Atkinson et al. (2007)    |
| G7604  | TrGBrCl   | $\text{BrCl} + \text{Cl} \rightarrow \text{Br} + \text{Cl}_2$                                                          | $1.45\text{E-}11$                                                                                                                   | Clyne and Cruse (1972)    |
| G7605  | TrGBrCl   | $\text{CHCl}_2\text{Br} + \text{OH} \rightarrow \text{LCARBON} + 2 \text{ LCHLORINE} + \text{H}_2\text{O} + \text{Br}$ | $2.0\text{E-}12 * \text{EXP}(-840./\text{temp})$                                                                                    | see note*                 |
| G7606  | TrGBrCl   | $\text{CHClBr}_2 + \text{OH} \rightarrow \text{LCARBON} + \text{LCHLORINE} + \text{H}_2\text{O} + 2 \text{ Br}$        | $2.0\text{E-}12 * \text{EXP}(-840./\text{temp})$                                                                                    | see note*                 |
| G7607  | TrGBrCl   | $\text{CH}_2\text{ClBr} + \text{OH} \rightarrow \text{LCARBON} + \text{LCHLORINE} + \text{H}_2\text{O} + \text{Br}$    | $2.4\text{E-}12 * \text{EXP}(-920./\text{temp})$                                                                                    | Sander et al. (2011)*     |
| G8100  | TrGI      | $\text{I} + \text{O}_3 \rightarrow \text{IO} + \text{O}_2$                                                             | $2.1\text{E-}11 * \text{EXP}(-830./\text{temp})$                                                                                    | Atkinson et al. (2007)    |
| G8102  | TrGI      | $\text{OIO} + \text{OIO} \rightarrow \text{I}(\text{part})$                                                            | $5.\text{E-}11$                                                                                                                     | von Glasow et al. (2002)* |
| G8103  | TrGI      | $\text{IO} + \text{IO} \rightarrow .38 \text{ OIO} + 1.62 \text{ I} + .62 \text{ O}_2$                                 | $5.4\text{E-}11 * \text{EXP}(180./\text{temp})$                                                                                     | Atkinson et al. (2007)*   |
| G8200  | TrGI      | $\text{I} + \text{HO}_2 \rightarrow \text{HI} + \text{O}_2$                                                            | $1.5\text{E-}11 * \text{EXP}(-1090./\text{temp})$                                                                                   | Atkinson et al. (2007)    |
| G8201  | TrGI      | $\text{IO} + \text{HO}_2 \rightarrow \text{HOI} + \text{O}_2$                                                          | $1.4\text{E-}11 * \text{EXP}(540./\text{temp})$                                                                                     | Atkinson et al. (2007)    |
| G8202  | TrGI      | $\text{HI} + \text{OH} \rightarrow \text{I} + \text{H}_2\text{O}$                                                      | $1.6\text{E-}11 * \text{EXP}(440./\text{temp})$                                                                                     | Atkinson et al. (2007)    |
| G8203  | TrGI      | $\text{OIO} + \text{OH} \rightarrow \text{HIO}_3$                                                                      | $2.2\text{E-}10 * \text{EXP}(243./\text{temp})$                                                                                     | Plane et al. (2006)       |
| G8204  | TrGI      | $\text{I}_2 + \text{OH} \rightarrow \text{HOI} + \text{I}$                                                             | $2.1\text{E-}10$                                                                                                                    | Atkinson et al. (2007)    |
| G8300  | TrGIN     | $\text{I} + \text{NO}_2 \rightarrow \text{INO}_2$                                                                      | $k\_I\_N02$                                                                                                                         | Atkinson et al. (2007)*   |
| G8301  | TrGIN     | $\text{I} + \text{NO}_3 \rightarrow \text{IO} + \text{NO}_2$                                                           | $1.\text{E-}10$                                                                                                                     | Dillon et al. (2008)      |
| G8302  | TrGIN     | $\text{IO} + \text{NO} \rightarrow \text{I} + \text{NO}_2$                                                             | $7.15\text{E-}12 * \text{EXP}(300./\text{temp})$                                                                                    | Atkinson et al. (2007)    |
| G8303  | TrGIN     | $\text{IO} + \text{NO}_2 \rightarrow \text{INO}_3$                                                                     | $k\_3\text{rd\_iupac}(\text{temp}, \text{cair}, 7.7\text{E-}31, 5., 1.6\text{E-}11, 0., 0.4)$                                       | Atkinson et al. (2007)    |
| G8304  | TrGIN     | $\text{OIO} + \text{NO} \rightarrow \text{NO}_2 + \text{IO}$                                                           | $1.1\text{E-}12 * \text{EXP}(542./\text{temp})$                                                                                     | Atkinson et al. (2007)    |



Table 1: Gas phase reactions (... continued)

| #      | labels   | reaction                                                                                                                                      | rate coefficient                                                                                                                                 | reference                                                 |
|--------|----------|-----------------------------------------------------------------------------------------------------------------------------------------------|--------------------------------------------------------------------------------------------------------------------------------------------------|-----------------------------------------------------------|
| G8305  | TrGIN    | $\text{INO}_2 \rightarrow \text{I} + \text{NO}_2$                                                                                             | $k_{\text{I\_NO2}}/(3.7\text{E}-7*\text{EXP}(9568./\text{temp})$<br>$*1.1\text{E}6*\text{R\_gas}*\text{temp}/(\text{atm}2\text{Pa}*\text{N\_A})$ | van den Bergh and Troe (1976),<br>Atkinson et al. (2007)* |
| G8306  | TrGIN    | $\text{INO}_3 \rightarrow \text{IO} + \text{NO}_2$                                                                                            | 0.                                                                                                                                               | see note*                                                 |
| G8307  | TrGIN    | $\text{I}_2 + \text{NO}_3 \rightarrow \text{I} + \text{INO}_3$                                                                                | 1.5E-12                                                                                                                                          | Atkinson et al. (2007)                                    |
| G8308  | TrGIN    | $\text{IO} + \text{NO}_3 \rightarrow \text{OIO} + \text{NO}_2$                                                                                | 9.E-12                                                                                                                                           | Dillon et al. (2008)                                      |
| G8400  | TrGCI    | $\text{CH}_3\text{CHICH}_3 + \text{OH} \rightarrow 2 \text{LCARBON} + \text{CH}_3\text{O}_2 + \text{I}$                                       | 1.22E-12                                                                                                                                         | Carl and Crowley (2001)                                   |
| G8401  | TrGI     | $\text{CH}_3\text{O}_2 + \text{IO} \rightarrow .4 \text{I} + .6 \text{OIO} + \text{HCHO} + \text{HO}_2$                                       | 2.E-12                                                                                                                                           | Dillon et al. (2006b), Bale et al.<br>(2005)*             |
| G8402  | TrGIN    | $\text{CH}_3\text{I} + \text{NO}_3 \rightarrow \text{HNO}_3 + \text{HCHO} + \text{IO}$                                                        | 3.4E-17                                                                                                                                          | Wayne et al. (1991)*                                      |
| G8600  | TrGCII   | $\text{IO} + \text{ClO} \rightarrow .2 \text{ICl} + .25 \text{Cl} + .55 \text{OClO} + .8 \text{I} + .45 \text{O}_2$                           | $4.7\text{E}-12*\text{EXP}(280./\text{temp})$                                                                                                    | Atkinson et al. (2007)                                    |
| G8700  | TrGBrI   | $\text{I} + \text{BrO} \rightarrow \text{IO} + \text{Br}$                                                                                     | 1.2E-11                                                                                                                                          | Sander et al. (2011)                                      |
| G8701  | TrGBrI   | $\text{IO} + \text{BrO} \rightarrow \text{Br} + .8 \text{OIO} + .2 \text{I} + .2 \text{O}_2$                                                  | $1.5\text{E}-11*\text{EXP}(510./\text{temp})$                                                                                                    | Atkinson et al. (2007)*                                   |
| G9200  | StTrGS   | $\text{SO}_2 + \text{OH} \rightarrow \text{H}_2\text{SO}_4 + \text{HO}_2$                                                                     | $k_{\text{3rd}}(\text{temp}, \text{cair}, 3.3\text{E}-31, 4.3,$<br>$1.6\text{E}-12, 0., 0.6)$                                                    | Sander et al. (2011)                                      |
| G9400a | TrGCS    | $\text{DMS} + \text{OH} \rightarrow \text{CH}_3\text{SO}_2 + \text{HCHO}$                                                                     | $1.13\text{E}-11*\text{EXP}(-253./\text{temp})$                                                                                                  | Atkinson et al. (2004)*                                   |
| G9400b | TrGCS    | $\text{DMS} + \text{OH} \rightarrow \text{DMSO} + \text{HO}_2$                                                                                | $k_{\text{DMS\_OH}}$                                                                                                                             | Atkinson et al. (2004)*                                   |
| G9401  | TrGCNS   | $\text{DMS} + \text{NO}_3 \rightarrow \text{CH}_3\text{SO}_2 + \text{HNO}_3 + \text{HCHO}$                                                    | $1.9\text{E}-13*\text{EXP}(520./\text{temp})$                                                                                                    | Atkinson et al. (2004)                                    |
| G9402  | TrGCS    | $\text{DMSO} + \text{OH} \rightarrow .6 \text{SO}_2 + \text{HCHO} + .6 \text{CH}_3 + .4 \text{HO}_2 +$<br>$.4 \text{CH}_3\text{SO}_3\text{H}$ | 1.E-10                                                                                                                                           | Hynes and Wine (1996)                                     |
| G9403  | TrGS     | $\text{CH}_3\text{SO}_2 \rightarrow \text{SO}_2 + \text{CH}_3$                                                                                | $1.8\text{E}13*\text{EXP}(-8661./\text{temp})$                                                                                                   | Barone et al. (1995)                                      |
| G9404  | TrGS     | $\text{CH}_3\text{SO}_2 + \text{O}_3 \rightarrow \text{CH}_3\text{SO}_3$                                                                      | 3.E-13                                                                                                                                           | Barone et al. (1995)                                      |
| G9405  | TrGS     | $\text{CH}_3\text{SO}_3 + \text{HO}_2 \rightarrow \text{CH}_3\text{SO}_3\text{H}$                                                             | 5.E-11                                                                                                                                           | Barone et al. (1995)                                      |
| G9408  | StTrGS   | $\text{CH}_2\text{OO} + \text{SO}_2 \rightarrow \text{H}_2\text{SO}_4 + \text{HCHO}$                                                          | $k_{\text{CH200\_S02}}$                                                                                                                          | Welz et al. (2012), Stone et al.<br>(2014)*               |
| G9409  | TrGTerCS | $\text{NOPINOO} + \text{SO}_2 \rightarrow \text{NOPINONE} + \text{H}_2\text{SO}_4$                                                            | 7.E-14                                                                                                                                           | Rickard and Pascoe (2009)                                 |
| G9410  | TrGTerCS | $\text{APINAOO} + \text{SO}_2 \rightarrow \text{PINAL} + \text{H}_2\text{SO}_4$                                                               | 7.00E-14                                                                                                                                         | Rickard and Pascoe (2009)                                 |
| G9411  | TrGTerCS | $\text{APINBOO} + \text{SO}_2 \rightarrow \text{PINAL} + \text{H}_2\text{SO}_4$                                                               | 7.00E-14                                                                                                                                         | Rickard and Pascoe (2009)                                 |
| G9412  | TrGTerCS | $\text{MBOOO} + \text{SO}_2 \rightarrow \text{IBUTALOH} + \text{H}_2\text{SO}_4$                                                              | 7.00E-14                                                                                                                                         | Rickard and Pascoe (2009)                                 |
| G9600  | TrGCCIS  | $\text{DMS} + \text{Cl} \rightarrow \text{CH}_3\text{SO}_2 + \text{HCl} + \text{HCHO}$                                                        | 3.3E-10                                                                                                                                          | Atkinson et al. (2004)                                    |
| G9700  | TrGBrCS  | $\text{DMS} + \text{Br} \rightarrow \text{CH}_3\text{SO}_2 + \text{HBr} + \text{HCHO}$                                                        | $9\text{E}-11*\text{EXP}(-2386./\text{temp})$                                                                                                    | Jefferson et al. (1994)                                   |
| G9701  | TrGBrCS  | $\text{DMS} + \text{BrO} \rightarrow \text{DMSO} + \text{Br}$                                                                                 | 4.4E-13                                                                                                                                          | Ingham et al. (1999)                                      |
| G9800  | TrGCIS   | $\text{DMS} + \text{IO} \rightarrow \text{DMSO} + \text{I}$                                                                                   | $3.2\text{E}-13*\text{EXP}(-925./\text{temp})$                                                                                                   | Dillon et al. (2006a)                                     |
| G10100 | TrGHg    | $\text{Hg} + \text{O}_3 \rightarrow \text{HgO} + \text{O}_2$                                                                                  | 3.0E-20                                                                                                                                          | Hall (1995)                                               |
| G10200 | TrGHg    | $\text{Hg} + \text{OH} \rightarrow \text{HgO} + \text{H}$                                                                                     | $3.55\text{E}-14*\text{EXP}(294./\text{temp})$                                                                                                   | Pal and Ariya (2004)                                      |
| G10201 | TrGHg    | $\text{Hg} + \text{H}_2\text{O}_2 \rightarrow \text{HgO} + \text{H}_2\text{O}$                                                                | 8.5E-19                                                                                                                                          | Tokos et al. (1998)*                                      |

Table 1: Gas phase reactions (... continued)

| #      | labels    | reaction                                                    | rate coefficient                                  | reference                   |
|--------|-----------|-------------------------------------------------------------|---------------------------------------------------|-----------------------------|
| G10600 | TrGClHg   | $\text{Hg} + \text{Cl} \rightarrow \text{HgCl}$             | 1.0E-11                                           | Ariya et al. (2002)         |
| G10601 | TrGClHg   | $\text{Hg} + \text{Cl}_2 \rightarrow \text{HgCl}_2$         | 2.6E-18                                           | Ariya et al. (2002)         |
| G10700 | TrGBrHg   | $\text{Hg} + \text{Br} \rightarrow \text{HgBr}$             | 3.0E-13                                           | Donohoue et al. (2006)      |
| G10701 | TrGBrHg   | $\text{HgBr} + \text{Br} \rightarrow \text{HgBr}_2$         | $2.5\text{E}-10 * (\text{temp}/298.)^{**}(-0.57)$ | Goodsite et al. (2004)      |
| G10702 | TrGBrHg   | $\text{Hg} + \text{Br}_2 \rightarrow \text{HgBr}_2$         | 9.0E-17                                           | Ariya et al. (2002)         |
| G10703 | TrGBrHg   | $\text{Hg} + \text{BrO} \rightarrow \text{HgO} + \text{Br}$ | 1.0E-15                                           | Raofie and Ariya (2003)     |
| G10704 | TrGBrHg   | $\text{HgBr} + \text{BrO} \rightarrow \text{BrHgOBr}$       | 3.0E-12                                           | Calvert and Lindberg (2003) |
| G10705 | TrGBrClHg | $\text{HgCl} + \text{BrO} \rightarrow \text{ClHgOBr}$       | 3.0E-12                                           | Calvert and Lindberg (2003) |
| G10706 | TrGBrClHg | $\text{HgBr} + \text{Cl} \rightarrow \text{ClHgBr}$         | 3.0E-12                                           | Calvert and Lindberg (2003) |
| G10707 | TrGBrClHg | $\text{HgCl} + \text{Br} \rightarrow \text{ClHgBr}$         | 3.0E-12                                           | Calvert and Lindberg (2003) |

## General notes

### Three-body reactions

Rate coefficients for three-body reactions are defined via the function `k_3rd(T, M, k0300, n, kinf300, m, fc)`. In the code, the temperature  $T$  is called `temp` and the concentration of "air molecules"  $M$  is called `cair`. Using the auxiliary variables  $k_0(T)$ ,  $k_{inf}(T)$ , and  $k_{ratio}$ , `k_3rd` is defined as:

$$k_0(T) = k_0^{300} \times \left(\frac{300\text{K}}{T}\right)^n \quad (1)$$

$$k_{inf}(T) = k_{inf}^{300} \times \left(\frac{300\text{K}}{T}\right)^m \quad (2)$$

$$k_{ratio} = \frac{k_0(T)M}{k_{inf}(T)} \quad (3)$$

$$\text{k\_3rd} = \frac{k_0(T)M}{1 + k_{ratio}} \times f_c \left(\frac{1}{1 + (\log_{10}(k_{ratio}))^2}\right) \quad (4)$$

A similar function, called `k_3rd_iupac` here, is used by T. J. Wallington et al. (2014) for three-body reactions. It has the same function parameters as `k_3rd` and it is defined as:

$$k_0(T) = k_0^{300} \times \left(\frac{300\text{K}}{T}\right)^n \quad (5)$$

$$k_{inf}(T) = k_{inf}^{300} \times \left(\frac{300\text{K}}{T}\right)^m \quad (6)$$

$$k_{ratio} = \frac{k_0(T)M}{k_{inf}(T)} \quad (7)$$

$$N = 0.75 - 1.27 \times \log_{10}(f_c) \quad (8)$$

$$\text{k\_3rd\_iupac} = \frac{k_0(T)M}{1 + k_{ratio}} \times f_c \left(\frac{1}{1 + (\log_{10}(k_{ratio})/N)^2}\right) \quad (9)$$

### RO<sub>2</sub> self and cross reactions

The self and cross reactions of organic peroxy radicals are treated according to the permutation reaction formalism as implemented in the MCM (Rickard and Pascoe, 2009), as described by Jenkin et al. (1997). Every organic peroxy radical reacts in a pseudo-first-order reaction with a rate constant that is expressed as  $k^{1st} = 2 \times \sqrt{k_{self} \times k_{CH3O2}} \times [\text{RO}_2]$  where  $k_{self}$  = second-order rate coefficient of the self reaction of the organic peroxy radical,  $k_{CH3O2}$  = second-order rate coefficient of the self reaction of  $\text{CH}_3\text{O}_2$ , and  $[\text{RO}_2]$  = sum of the concentrations of all organic peroxy radicals.

### Specific notes

G1002a: The path leading to  $2 \text{O}(^3\text{P}) + \text{O}_2$  results in a null cycle regarding odd oxygen and is neglected.

G2110: The rate coefficient is: `k_HO2_HO2 = (1.5E-12*EXP(19./temp)+1.7E-33*EXP(1000./temp)*cair)*(1.+1.4E-21*EXP(2200./temp)*C(ind_H2O))`. The value for the first (pressure-independent) part is from Christensen et al. (2002), the water term from Kircher and Sander (1984).

G2117: Converted to  $K_c [\text{molec}^{-1} \text{cm}^3] = K_p * R * T / N_A$ , where  $R$  is 82.05736 [ $\text{cm}^3 \text{atm K}^{-1} \text{mol}^{-1}$ ].

G2118: Assuming fast equilibrium.

G3109: The rate coefficient is: `k_NO3_NO2 = k_3rd(temp, cair, 2.E-30, 4.4, 1.4E-12, 0.7, 0.6)`.

G3110: The rate coefficient is defined as backward reaction divided by equilibrium constant.

G3203: The rate coefficient is: `k_NO2_HO2 = k_3rd(temp, cair, 1.8E-31, 3.2, 4.7E-12, 1.4, 0.6)`.

G3206: The rate coefficient is: `k_HNO3_OH = 2.4E-14 * EXP(460./temp) + 1./ ( 1./`

`(6.5E-34 * EXP(1335./temp)*cair) + 1./ (2.7E-17 * EXP(2199./temp)) )`

G3207: The rate coefficient is defined as backward reaction divided by equilibrium constant.

G4104b: Methyl nitrate yield according to Banic et al. (2003) but reduced by a factor of 10 according to the upper limit derived from measurements by Munger et al. (1999).

G4116: Same value as for PAN + OH.

G4126: Same as for G4104 but scaled to match the recommended value at 298K.

G4127: Same as for  $\text{CH}_3\text{O}_2 + \text{NO}_3$  in G4105.

G4130a: SAR for H-abstraction by OH.

G4130b: SAR for H-abstraction by OH.

G4132: SAR for H-abstraction by OH.

G4133: Lower limit of the rate constant. Products uncertain but  $\text{CH}_3\text{OH}$  can be excluded because of a likely high energy barrier (L. Vereecken, pers. comm.).  $\text{CH}_2\text{OO}$  production cannot be excluded.

G4134: Estimate based on the decomposition lifetime of 3 s (Olzmann et al., 1997) and a 20 kcal/mol energy barrier (Vereecken and Francisco, 2012).

G4135: Rate constant for  $\text{CH}_2\text{OO} + \text{NO}_2$  (G4138) multiplied by the factor from Ouyang et al. (2013).

G4136: Average of two measurements.

G4137: Upper limit.

G4138: Average of 7.E-12 and 1.5E-12.

G4141:  $\text{HOOCH}_2\text{OCHO}$  forms and then decomposes to formic anhydride (Gruzdev et al., 1993) which hydrolyses in the humid atmosphere (Conn et al., 1942).

G4142: High-pressure limit.

G4143: Generic estimate for reaction with alcohols.

G4144: Generic estimate for reaction with  $\text{RO}_2$ .

**G4149:** Barnes et al. (1985) estimated a decomposition rate equal to that of  $\text{CH}_3\text{O}_2\text{NO}_2$ .

**G4150:** Value for  $\text{CH}_3\text{O}_2\text{NO}_2 + \text{OH}$ , H-abstraction enhanced by the HO-group by  $f_{\text{soh}}$ .

**G4154:** Products assumed to be  $\text{CH}_3\text{O}_2 + \text{O}_2$  (could also be  $\text{HCHO} + \text{O}_2 + \text{OH}$ ).

**G4160b:** Half of the H-yield is attributed to fast secondary chemistry.

**G4160c:** The NH + CO channel is also significant but neglected here.

**G4161:** No studies below 450 K and only the major channel is considered.

**G4164:** Upper limit. Dominant pathway under atmospheric conditions.

**G42001:** The product distribution is from Rickard and Pascoe (2009), after substitution of the energized Criegee intermediate,  $\text{CH}_2\text{OO}$ , by its decomposition products and reaction of the stabilized CI with the water dimer.

**G42010:** Only major channel considered as the end products are essentially the same.

**G42013:** The rate coefficient is:  $k_{\text{CH3CO3\_NO2}} = k_{\text{3rd}}(\text{temp}, \text{cair}, 9.7\text{E-}29, 5.6, 9.3\text{E-}12, 1.5, 0.6)$ .

**G42018:** The rate coefficient is the same as for the  $\text{CH}_3$  channel in G4107 ( $\text{CH}_3\text{OOH} + \text{OH}$ ).

**G42021:** The rate coefficient is  $k_{\text{PAN\_M}} = k_{\text{CH3CO3\_NO2}}/9.\text{E-}29 * \text{EXP}(-14000./\text{temp})$ , i.e. the rate coefficient is defined as backward reaction divided by equilibrium constant.

**G42024a:** Rate constant is the high-pressure limit as recommended by Atkinson et al. (2006).

**G42024b:** Rate constant is the high-pressure limit as recommended by Atkinson et al. (2006).

**G42047:** Orlando et al. (1998) estimated that about 25% of the  $\text{HOCH}_2\text{CH}_2\text{O}$  in this reaction is produced with sufficient excess energy that it decomposes promptly. The decomposition products are 2 HCHO +  $\text{HO}_2$ .

**G42051a:** Same as for the  $\text{CH}_3\text{O}_2$  channel in G4107:  $\text{CH}_3\text{OOH} + \text{OH}$ .

**G42058b:** The aldehydic H is assumed to be like the analogous H of  $\text{HOCH}_2\text{CHO}$ .

**G42074a:** Factor of 3 to match the estimate of  $k = 1.\text{E-}11$  molec/cm<sup>3</sup>/s by Paulot et al. (2009a).

**G42074b:** Factor of 3 to match the estimate of  $k = 1.\text{E-}11$  molec/cm<sup>3</sup>/s by Paulot et al. (2009a).

**G42075:**  $\text{NO}_3\text{CH}_2\text{CO}_2\text{H}$  and  $\text{NO}_3\text{CH}_2\text{CO}_3\text{H}$  neglected.

**G42078:**  $\text{NO}_3\text{CH}_2\text{CO}_2\text{H}$  neglected.

**G42082:** Same rate constant as for PAN + OH.

**G42083a:** Rate constant is the high-pressure limit as recommended by Atkinson et al. (2006).

**G42083b:** Rate constant is the high-pressure limit as recommended by Atkinson et al. (2006).

**G42085a:** Uncertainties on the kinetics at pressures < 0.1 bar.

**G42085b:** Channel proposed by Hynes and Wine 1991, OH + HCHO + HOCN, could not be confirmed by Tyndall et al. (2001b). There is no alternative mechanism at the moment. Products assumed to be OH +  $\text{CH}_3\text{CO}_3$  + NO

**G42086b:** Assuming HCN is from channel 2h, HCO + H + HCN. HCO is replaced by H + CO.

**G42086c:** Assuming exothermic channels 2b and 2d are equally important.

**G42087:** HCOCN is produced but replaced here by its likely oxidation products (HCN +  $\text{CO}_2$ ) as studied by Tyndall et al. (2001b). The rate constant for a typical  $\text{RO}_2 + \text{NO}$  reaction is used.

**G42088:**  $\text{NCCH}_2\text{OOH}$  is produced but replaced here by its likely oxidation products (HCN +  $\text{CO}_2$ ) as studied by Tyndall et al. (2001b). The rate constant for a typical  $\text{RO}_2 + \text{HO}_2$  reaction is used.

**G42089a:** The minor channel with  $k=5.2\text{E-}12$  is combined with the major one producing HCOOH.

**G42090:** Theoretical keto-enol tautomerization catalyzed by formic acid (Grenfell et al., 2006).

**G42091:** Theoretical keto-enol tautomerization catalyzed by formic acid (Grenfell et al., 2006).

**G43001a:** Branching ratios according to Rickard et al. (1999).

**G43001b:** Branching ratios according to Rickard et al. (1999).

**G43004:** The value for the generic  $\text{RO}_2 + \text{HO}_2$  reaction from Atkinson (1997) is used here.

**G43008:** The value for the generic  $\text{RO}_2 + \text{HO}_2$  reaction from Atkinson (1997) is used here.

**G43011:** Strong positive deviation of k below 240 K compared to the expression recommended by JPL (Sander et al., 2011).

**G43015a:** The same value as for G4107 ( $\text{CH}_3\text{OOH} + \text{OH}$ ) is used, multiplied by the branching ratio of the  $\text{CH}_3\text{O}_2$  channel.

**G43028:** Alkyl nitrate formation neglected. (also not considered in MCM).

**G43037:** Alkyl nitrate formation neglected. (also not considered in MCM).

**G43040a:** Rate coefficient estimated with SAR (Taraborrelli, 2010).

**G43040b:** Rate coefficient estimated with SAR (Taraborrelli, 2010).

**G43044:** Alkyl nitrate formation neglected.

G43045c: Rate coefficient assumed to equal to the one of hydroxyacetone (ACETOL) for this channel.

G43048: Using the high-pressure limit.

G43049: The pressure fall-off between 1000 and 100 mbar is only 3% (Kirchner et al., 1999).

G43050: Value for  $\text{CH}_3\text{O}_2\text{NO}_2 + \text{OH}$ , H-abstraction enhanced by the  $\text{CH}_3\text{CO}$ -group by  $f_{\text{co}}$ .

G43051c: Products approximated with  $\text{C}_2\text{H}_5\text{CHO} + \text{HO}_2$ .

G43052: Only major H-abstraction channel considered.

G43059: Products approximated with the major end-product  $\text{CH}_3\text{CHO}$ .

G43060b: Products approximated with the major end-product  $\text{CH}_3\text{CHO}$ .

G43061: Products approximated with the likely end-product  $\text{CH}_3\text{CHO}$ .

G43065: As for  $\text{HCOCO}_3$ .

G43070a: Branching ratios estimated with SAR for H-abstraction rate constants by OH.

G43070b: Branching ratios estimated with SAR for H-abstraction rate constants by OH.

G43071a: Only this channel considered as the intermediate radical is likely more stable than  $\text{CHCH}(\text{OH})_2$ .

G43072: Theoretical keto-enol tautomerization catalyzed by formic acid (Grenfell et al., 2006).

G43073: Theoretical keto-enol tautomerization catalyzed by formic acid (Grenfell et al., 2006).

G43074:  $\text{HCOCOCHO}$  would be produced but undergoes fast photolysis (faster than  $\text{MGLYOX}$ ) and is substituted with its products.

G43223: Products simplified

G43419:  $\text{KDEC C3DIALO} \rightarrow \text{GLYOX} + \text{CO} + \text{HO}_2$

G43420:  $\text{KDEC C3DIALO} \rightarrow \text{GLYOX} + \text{CO} + \text{HO}_2$

G43421: Permutation reaction (minor channels removed).

G44000: The  $\text{LC}_4\text{H}_9\text{O}_2$  composition ( $n\text{C}_4\text{H}_9\text{O}_2:\text{sC}_4\text{H}_9\text{O}_2$  ratio) is assumed to be equal to the ratio of the production rates at 298K:  $k_{\text{p}}/(k_{\text{p}}+k_{\text{s}}) = 0.1273$  and  $k_{\text{s}}/(k_{\text{p}}+k_{\text{s}}) = 0.8727$ .

G44001b:  $\text{sC}_4\text{H}_9\text{O}_2$  products are substituted with 0.636  $\text{MEK} + \text{HO}_2$  and 0.364  $\text{CH}_3\text{CHO} + \text{C}_2\text{H}_5\text{O}_2$  at 1 bar and 298 K.

G44003c: The alkyl nitrate yield is the weighted average yield for the two isomers forming from  $n\text{C}_4\text{H}_9\text{O}_2$  and  $\text{sC}_4\text{H}_9\text{O}_2$ .

G44010b: H-abstraction from primary C and substitution of the resulting peroxy radical with its products from the reaction with NO.

G44011: H-abstraction from primary C and substitution of the resulting peroxy radical with its products from the reaction with NO.

G44015b: Products assumed to be only from H-abstraction from a secondary C bearing the  $-\text{OOH}$  group.

G44016: Products assumed to be only from H-abstraction from a secondary C bearing the  $-\text{ONO}_2$  group.

G44018:  $\text{LHMVKABO}_2$  is  $0.12 \text{ HLMVKAO}_2 + 0.88 \text{ HLMVKBO}_2$ .

G44019:  $\text{LMEKO}_2$  represents  $0.62 \text{ MEKBO}_2 + 0.38 \text{ MEKAO}_2$ .

G44021a: The products of  $\text{MEKAO}$  are substituted with  $\text{HCHO} + \text{CO}_2 + \text{HOCH}_2\text{CH}_2\text{O}_2$ .

G44023a: Products from H-abstraction from the tertiary carbon bearing the  $\text{ONO}_2$  group.

G44023b: Products from H-abstraction from the secondary carbon bearing the  $\text{ONO}_2$  group.

G44025: Same value as for PAN.

G44026: Products as in G4415. Only the main channels for each isomer are considered. Weighted average for the isomers.

G44035: Rate constant replaced with the one of beta hydroxy  $\text{RO}_2$ .

G44046b: Using value for secondary nitrate (88% of total).

G44061a: Using value for secondary nitrate (88% of total).

G44061b: Using value for secondary nitrate (88% of total).

G44062a: Simplified products.

G44062b: Simplified products.

G44066: Alkyl nitrate formation neglected.

G44070: Alkyl nitrate formation neglected.

G44076: Alkyl nitrate formation neglected.

G44078: Other channel neglected.

G44081: Alkyl nitrate formation neglected.

G44082: Other channel neglected.

G44085:  $k$  for  $\text{CH}_3\text{CHCO}$  from Hatakeyama et al. (1985) adjusted.

G44086: Simplified product distribution.

G44089: The nitrated  $\text{RO}_2$  is replaced by its products upon reaction with NO.

G44096: Both  $\text{LBUT1ENO}_2$  isomers mostly  $\text{C}_2\text{H}_5\text{CHO}$ .

G44097a: Branching ratios according to Rickard et al. (1999).  $\text{CH}_3\text{CHO}_2\text{CHO}$  is replaced with its major products  $\text{CH}_3\text{CHO} + \text{CO} + \text{HO}_2$ .

G44097b: Branching ratios according to Rickard et al. (1999).

G44098: The nitrated RO<sub>2</sub> is replaced by its products upon reaction with NO.

G44103b: MEKCOH replaced by its major oxidation products.

G44104: Carbonyl nitrate replaced by its major oxidation products.

G44106: CH<sub>3</sub>CHOOA products as from C<sub>3</sub>H<sub>6</sub> + O<sub>3</sub> reaction.

G44107: The nitrated RO<sub>2</sub> is replaced by its products upon reaction with NO.

G44110: The nitrated RO<sub>2</sub> is replaced by its products upon reaction with NO.

G44124b: Skipping intermediate steps mostly leading to acetone.

G44126: Skipping intermediate steps mostly leading to acetone.

G44127: Only this channel considered as the intermediate radical is likely more stable than CHCH(OH)<sub>2</sub>.

G44128: Theoretical keto-enol tautomerization catalyzed by formic acid (Grenfell et al., 2006).

G44129: Theoretical keto-enol tautomerization catalyzed by formic acid (Grenfell et al., 2006).

G44130: Only this channel considered as the intermediate radical is likely more stable than CHCH(OH)<sub>2</sub>.

G44131: Theoretical keto-enol tautomerization catalyzed by formic acid (Grenfell et al., 2006).

G44132: Theoretical keto-enol tautomerization catalyzed by formic acid (Grenfell et al., 2006).

G44133: Only this channel considered as the intermediate radical is likely more stable than CHCH(OH)<sub>2</sub>.

G44134: Theoretical keto-enol tautomerization catalyzed by formic acid (Grenfell et al., 2006).

G44135: Theoretical keto-enol tautomerization catalyzed by formic acid (Grenfell et al., 2006).

G44136: Only this channel considered as the intermediate radical is likely more stable than CHCH(OH)<sub>2</sub>.

G44137: Theoretical keto-enol tautomerization catalyzed by formic acid (Grenfell et al., 2006).

G44138: Theoretical keto-enol tautomerization catalyzed by formic acid (Grenfell et al., 2006).

G44139: Simplified oxidation.

G44140: Simplified oxidation.

G44141: Simplified oxidation.

G44142: Simplified oxidation.

G44202: Alkyl nitrate formation neglected.

G44203a: Rate coefficient estimated with SAR (Taraborrelli, 2010).

G44205: Alkyl nitrate formation neglected.

G44210: Alkyl nitrate formation neglected.

G44221: Same k as for MGLYOX + OH (Tyndall et al., 1995).

G44402: KDEC NC4DCO<sub>2</sub> → MALANHY + NO<sub>2</sub>

G44406c: KDEC MALDIALCO<sub>2</sub> → .6 MALANHY + HO<sub>2</sub> + .4 GLYOX + .4 CO + .4 CO<sub>2</sub>

G44407: KDEC MALDIALCO<sub>2</sub> → .6 MALANHY + HO<sub>2</sub> + .4 GLYOX + .4 CO + .4 CO<sub>2</sub>

G44409: KDEC MALDIALCO<sub>2</sub> → .6 MALANHY + HO<sub>2</sub> + .4 GLYOX + .4 CO + .4 CO<sub>2</sub>

G44410: KDEC MALDIALCO<sub>2</sub> → .6 MALANHY + HO<sub>2</sub> + .4 GLYOX + .4 CO + .4 CO<sub>2</sub>

G44412: KDEC BZFUONOOA → .5 BZFUONOO + .5 CO + .5 CO<sub>2</sub> + .5 HCOCH<sub>2</sub>O<sub>2</sub> + .5 OH and BZFUONOO → .625 CO<sub>14</sub>O<sub>3</sub>CO<sub>2</sub>H + .375 CO<sub>14</sub>O<sub>3</sub>CHO + .375 H<sub>2</sub>O<sub>2</sub>

G44421: Only major channel.

G44424: KDEC: GLYOOA → .125 HCHO + .18 GLYOO + 0.82 HO<sub>2</sub> + .57 OH + 1.265 CO + .25 CO<sub>2</sub> and H<sub>2</sub>O substitution GLYOO → .625 HCOCO<sub>2</sub>H + .375 GLYOX + .375 H<sub>2</sub>O<sub>2</sub>

G44425: Merged equations.

G44430: KDEC MALANHYO → HCOCO<sub>2</sub>CO<sub>3</sub>

G44431: KDEC MALANHYO → HCOCO<sub>2</sub>CO<sub>3</sub>

G44432: Only major channel. KDEC MALANHYO → HCOCO<sub>2</sub>CO<sub>3</sub>

G44436: KDEC NBZFUO → .5 CO<sub>14</sub>O<sub>3</sub>CHO + .5 NO<sub>2</sub> + .5 NBZFUONE + .5 HO<sub>2</sub>

G44437: KDEC NBZFUO → .5 CO<sub>14</sub>O<sub>3</sub>CHO + .5 NO<sub>2</sub> + .5 NBZFUONE + .5 HO<sub>2</sub>

G44438: KDEC NBZFUO → .5 CO<sub>14</sub>O<sub>3</sub>CHO + .5 NO<sub>2</sub> + .5 NBZFUONE + .5 HO<sub>2</sub> and RO<sub>2</sub> Only major channel.

G44439: KDEC MALDIALCO<sub>2</sub> → .6 MALANHY + HO<sub>2</sub> + .4 GLYOX + .4 CO + .4 CO<sub>2</sub>

G44443: KDEC MECOACETO → CH<sub>3</sub>CO<sub>3</sub> + HCHO

G44444: KDEC MECOACETO → CH<sub>3</sub>CO<sub>3</sub> + HCHO

G44445: KDEC MECOACETO → CH<sub>3</sub>CO<sub>3</sub> + HCHO

G44450: KDEC BZFUO → CO<sub>14</sub>O<sub>3</sub>CHO + HO<sub>2</sub>

G44451: KDEC BZFUO → CO<sub>14</sub>O<sub>3</sub>CHO + HO<sub>2</sub>

G44452: KDEC BZFUO → CO<sub>14</sub>O<sub>3</sub>CHO + HO<sub>2</sub>. Only major channel.

G44457: KDEC MALDIALO → GLYOX + GLYOX + HO<sub>2</sub>

G44458: KDEC MALDIALO  $\rightarrow$  GLYOX + GLYOX + HO2

G44459: KDEC MALDIALO  $\rightarrow$  GLYOX + GLYOX + HO2. Only major channel.

G44461: KBPAN  $\rightarrow$  k\_PAN\_M

G45019d: Delta-1 and delta-2 LIEPOX are not considered and replaced by beta-LIEPOX formed by ISOP-BOOH and ISOPDOOH.

G45021: SAR estimate within uncertainty range of the experimentally determined rate constant by Solberg et al. (1997), 1.1E-11.

G45037: SAR estimate within uncertainty range of the experimentally determined rate constant by Solberg et al. (1997), 4.2E-11.

G45040: Alkyl nitrate formation neglected.

G45043: Old MCM rate constant 4.16E-11.

G45047: Alkyl nitrate formation neglected.

G45055: Alkyl nitrate formation neglected.

G45071: Alkyl nitrate formation neglected.

G45074: Formic acid production consistent with results of Bates et al. (2014). Here, the high yields of formic acid and hydroxycarbonyls at low NO from oxidation of cis-beta-LIEPOX (the most abundant isomer) are approximated with the production of DB1O which undergo both the Dibble double H-transfer to DB2O2 and HOCH2 elimination yielding HVMK and HMAC (keto-vinyl alcohol potentially arising from decomposition of the alkoxy radical resulting from the ring opening after H-abstraction). The rate constant is from Paulot et al. (2009b) and adjusted based on Bates et al. (2014) that determined the single rate constants for the cis- and trans- beta isomer.

G45080: Alkyl nitrate formation neglected.

G45092a: ZCODC23DBCOD = CM4DIAL in MCM only from aromatics.

G45092b: Only one acyl peroxy radical considered.

G45093: Two aldehydic sites reacting with NO<sub>3</sub> but only one isomer product considered.

G45095: Alkyl nitrate formation neglected.

G45098: Alkyl nitrate formation neglected.

G45100: Alkyl nitrate formation neglected.

G45104a: DB1OOH is a hydroperoxide bearing a vinyl alcohol moiety that upon reaction with OH yields HCOOH (Davis et al., 1998).

G45107: OH production here is to take into account the hydroperoxidic function formed by the shift of the enolic hydrogen and not present in DB2O2. This approximation leads to spurious HO<sub>2</sub> production.

G45108a: Consistent with the results of Bates et al. (2014).

G45108b: Consistent with the results of Bates et al. (2014). Assuming that the enol alkoxy radical partly decomposes yielding a substitute vinyl alcohol.

G45111: Alkyl nitrate formation neglected.

G45114b: Here, formic acid is mechanistically produced by the OH-addition to the vinyl alcohol which, upon RO<sub>2</sub>-to-RO conversion (skipped here), yields the HOCHOH fragment which in turn reacts with O<sub>2</sub> forming HCOOH + HO<sub>2</sub>. Along CH<sub>3</sub>COCHOOHCHO should be produced but not in the mechanism. Only CH<sub>3</sub>COCHO<sub>2</sub>CHO. The rate constant is consistent with predictions by Ganzeveld et al. (2006) for ENOL. OH-addition to the OH-bearing carbon is considered the dominant channel as it is already for the ENOL (Ganzeveld et al., 2006).

G45115: Theoretical keto-enol tautomerization catalyzed by formic acid (Grenfell et al., 2006). The product should be C1ODC3OOHC4OD but it is neglected in the mechanism.

G45116: As for DB1OOH + OH.

G45117: Additional sinks for DB2OOH are neglected.

G45121b: Nitrate assumed to be major isomer that is mostly similar to products of ISOPDO2-chemistry.

G45128: Rate constant by Liljegren and Stevens (2013). A lumped RO<sub>2</sub> that upon conversion to RO yields 100% 2-methyl-butenedial (ZCODC23DBCOD) although Aschmann et al. (2014) quantified a 38% yield of the Z/E mixture.

G45129: As for 3METHYLFURAN + OH but with additional NO<sub>2</sub> production for mass conservation.

G45131: Alkyl nitrate formation neglected.

G45132: Hydroperoxide formation neglected.

G45134b: ZCO2HC23DBCOD formation is neglected. However, it is produced in MCM and in aromatic-related reactions under the name of MC3ODBCO2H.

G45139: ZCPANC23DBCOD is assumed to react like LC5PAN1719.

G45201: Alkyl nitrate formation neglected.

G45207: Alkyl nitrate formation neglected.

G45214: Alkyl nitrate formation neglected.

G45217: Alkyl nitrate formation neglected.

G45225: Alkyl nitrate formation neglected.

G45236: LMBOABO2 = .67 MBOAO2 + .33 MBOBO2

G45247: Alkyl nitrate formation neglected.

G45400: KDEC NC4MDCO2  $\rightarrow$  MMALANHY + NO2

G45404: KDEC NTLFUO  $\rightarrow$  ACCOMECHO + NO2

G45405: KDEC NTLFUO  $\rightarrow$  ACCOMECHO + NO2

G45406: KDEC NTLFUO  $\rightarrow$  ACCOMECHO

G45409: KBPAN → k.PAN\_M(renaming)

G45413: KFPAN → k.CH3CO3\_NO2 (renaming)

G45422: KDEC MMALANHYO→CO2H3CO3

G45423: KDEC MMALANHYO→CO2H3CO3

G45424: KDEC MMALANHYO→CO2H3CO3 and Only major channel.

G45429: KBPAN → k.PAN\_M (renamed)

G45430a: KDEC C5CO14CO2 →.83 MALANHY + .83 CH3 + .17 MGLYOX + .17 HO2 + .17 CO + .17 CO2

G45431: KDEC C5CO14CO2 →.83 MALANHY + .83 CH3 + .17 MGLYOX + .17 HO2 + .17 CO + .17 CO2

G45432: KFPAN →k.CH3CO3\_NO2 (renaming)

G45433: KDEC C5CO14CO2 →.83 MALANHY + .83 CH3 + .17 MGLYOX + .17 HO2 + .17 CO + .17 CO2

G45434: KDEC C5CO14CO2 →.83 MALANHY + .83 CH3 + .17 MGLYOX + .17 HO2 + .17 CO + .17 CO2 and only major channel.

G45436: KDEC C5CO14CO2 → .83 MALANHY + .83 CH3 + .17 MGLYOX + .17 HO2 + .17 CO + .17 CO2

G45444: KDEC MC3CODBCO2 → .35 GLYOX + .35 CH3 + .35 CO + .35 CO2 + .65 MMALANHY + .65 HO2

G45452: KDEC TLFUONOOA →.5 CO + .5 OH + .5 MECOACETO2 + .5 TLFUONOO and H2O subs TLFUONOO →.625 C24O3CCO2H + .375 ACCOMECHO + .375 H2O2

G45456: KFPAN →k.CH3CO3\_NO2 (renaming)

G45476b: KDEC NTLFUO → ACCOMECHO + NO2 and reactions with KRO2HO2.

G45477: KDEC NTLFUO → ACCOMECHO + NO2

G45478: KDEC NTLFUO → ACCOMECHO + NO2

G45479: KDEC NTLFUO → ACCOMECHO + NO2

G45486b: KDEC C5DIALO →MALDIAL + CO + HO2 and reactions with KRO2HO2.

G45487: KDEC C5DIALO →MALDIAL

G45488: KDEC C5DIALO →MALDIAL

G45489: KDEC C5DIALO →MALDIAL

G45491b: Reactions with KRO2HO2.

G45492: MGLYOX + GLYOX + HO2 from KDEC substitution

G45493: MGLYOX + GLYOX + HO2 from KDEC substitution

G45494: Permutation reaction (minor channels removed).

G46201: Alkyl nitrate formation neglected.

G46404b: Reactions with KRO2HO2 and KDEC C615CO2O → C5DICARB + CO + HO2.

G46405: KDEC C615CO2O → C5DICARB + CO + HO2

G46406: KDEC C615CO2O → C5DICARB + CO + HO2

G46407: Only major channel.

G46413b: Reactions with KRO2HO2 and KDEC ND-NPHENO → NC4DCO2H + HNO3 + CO + CO + NO2.

G46414: KDEC NDNPHENO → NC4DCO2H + HNO3 + CO + CO + NO2

G46415: KDEC NDNPHENO → NC4DCO2H + HNO3 + CO + CO + NO2

G46416: KDEC NDNPHENO → NC4DCO2H + HNO3 + CO + CO + NO2

G46418: KDEC CATECOOA → MALDALCO2H + HCOCO2H + HO2 + OH

G46426: KFPAN →k.CH3CO3\_NO2

G46430: KDEC GLYOOA → .125 HCHO + .18 GLYOO + .82 HO2 + .57 OH + 1.265 CO

G46432b: Reactions with KRO2HO2 and KDEC NCATECO → NC4DCO2H + HCOCO2H + HO2

G46433: KDEC NCATECO → NC4DCO2H + HCOCO2H + HO2

G46434: KDEC NCATECO → NC4DCO2H + HCOCO2H + HO2

G46435: KDEC NCATECO → NC4DCO2H + HCOCO2H + HO2

G46437b: Reactions with KRO2HO2 and KDEC NPHENO → MALDALCO2H + GLYOX + NO2

G46438: KDEC NPHENO → MALDALCO2H + GLYOX + NO2

G46439: KDEC NPHENO → MALDALCO2H + GLYOX + NO2

G46440: KDEC NPHENO → MALDALCO2H + GLYOX + NO2

G46441: Merged equations.

G46447b: reactions with KRO2HO2 and KDEC NNCATECO → NC4DCO2H + HCOCO2H + NO2

G46448: KDEC NNCATECO → NC4DCO2H + HCOCO2H + NO2

G46449: KDEC NNCATECO → NC4DCO2H + HCOCO2H + NO2

G46450: KDEC NNCATECO → NC4DCO2H + HCOCO2H + NO2

G46457: Merged equations.

G46458: Merged equations.

G46461b: Reactions with KRO2HO2 and KDEC PHENO → .71 MALDALCO2H + .71 GLYOX + .29 PBZQONE + HO2

G46462: KDEC PHENO → .71 MALDALCO2H + .71 GLYOX + .29 PBZQONE + HO2



G46463: KDEC PHENO  $\rightarrow$  .71 MALDALCO<sub>2</sub>H + .71 GLYOX + .29 PBZQONE + HO<sub>2</sub>

G46464: KDEC PHENO  $\rightarrow$  .71 MALDALCO<sub>2</sub>H + .71 GLYOX + .29 PBZQONE + HO<sub>2</sub> and Only major channel.

G46468: KFPAN  $\rightarrow$  k.CH<sub>3</sub>CO<sub>3</sub>.NO<sub>2</sub>

G46472b: new channel

G46476: HOC<sub>6</sub>H<sub>4</sub>NO<sub>2</sub> is a nitro-phenol

G46480b: Reactions with KRO<sub>2</sub>HO<sub>2</sub> and KDEC PBZQO  $\rightarrow$  C<sub>5</sub>CO<sub>2</sub>OHCO<sub>3</sub>

G46481: KDEC PBZQO  $\rightarrow$  C<sub>5</sub>CO<sub>2</sub>OHCO<sub>3</sub>

G46482: KDEC PBZQO  $\rightarrow$  C<sub>5</sub>CO<sub>2</sub>OHCO<sub>3</sub>

G46483: KDEC PBZQO  $\rightarrow$  C<sub>5</sub>CO<sub>2</sub>OHCO<sub>3</sub> and Only major channel.

G46485b: Reactions with KRO<sub>2</sub>HO<sub>2</sub> and KDEC DNPHENO  $\rightarrow$  NC<sub>4</sub>DCO<sub>2</sub>H + HCOCO<sub>2</sub>H + NO<sub>2</sub>

G46486: KDEC DNPHENO  $\rightarrow$  NC<sub>4</sub>DCO<sub>2</sub>H + HCOCO<sub>2</sub>H + NO<sub>2</sub>

G46487: KDEC DNPHENO  $\rightarrow$  NC<sub>4</sub>DCO<sub>2</sub>H + HCOCO<sub>2</sub>H + NO<sub>2</sub>

G46488: KDEC DNPHENO  $\rightarrow$  NC<sub>4</sub>DCO<sub>2</sub>H + HCOCO<sub>2</sub>H + NO<sub>2</sub>

G46490b: Reactions with KRO<sub>2</sub>HO<sub>2</sub> and KDEC BZEMUCO  $\rightarrow$  .5 EPXC<sub>4</sub>DIAL + .5 GLYOX + .5 HO<sub>2</sub> + .5 C<sub>3</sub>DIALO<sub>2</sub> + .5 C<sub>3</sub>OH<sub>13</sub>CO.

G46491b: KDEC BZEMUCO  $\rightarrow$  .5 EPXC<sub>4</sub>DIAL + .5 GLYOX + .5 HO<sub>2</sub> + .5 C<sub>3</sub>DIALO<sub>2</sub> + .5 C<sub>3</sub>OH<sub>13</sub>CO.

G46492: KDEC BZEMUCO  $\rightarrow$  .5 EPXC<sub>4</sub>DIAL + .5 GLYOX + .5 HO<sub>2</sub> + .5 C<sub>3</sub>DIALO<sub>2</sub> + .5 C<sub>3</sub>OH<sub>13</sub>CO

G46493: KDEC BZEMUCO  $\rightarrow$  .5 EPXC<sub>4</sub>DIAL + .5 GLYOX + .5 HO<sub>2</sub> + .5 C<sub>3</sub>DIALO<sub>2</sub> + .5 C<sub>3</sub>OH<sub>13</sub>CO and Only major channel.

G46499b: Reactions with KRO<sub>2</sub>HO<sub>2</sub> and KDEC NBZQO  $\rightarrow$  C<sub>6</sub>CO<sub>4</sub>DB + NO<sub>2</sub>.

G46500: KDEC NBZQO  $\rightarrow$  C<sub>6</sub>CO<sub>4</sub>DB + NO<sub>2</sub>

G46501: KDEC NBZQO  $\rightarrow$  C<sub>6</sub>CO<sub>4</sub>DB + NO<sub>2</sub>

G46502: KDEC NBZQO  $\rightarrow$  C<sub>6</sub>CO<sub>4</sub>DB + NO<sub>2</sub>

G46505b: New channel.

G46515: Only major channel.

G46517b: New channel.

G46522b: In analogy to TLBIPERO<sub>2</sub> from toluene (Birdsall et al., 2010).

G46523b: KDEC BZBIPERO  $\rightarrow$  GLYOX + HO<sub>2</sub> + .5 BZFUONE + .5 BZFUONE

G46524: KDEC BZBIPERO  $\rightarrow$  GLYOX + HO<sub>2</sub> + .5 BZFUONE + .5 BZFUONE

G46525: KDEC BZBIPERO  $\rightarrow$  GLYOX + HO<sub>2</sub> + .5 BZFUONE + .5 BZFUONE and Only major channel.

G47210: Alkyl nitrate formation neglected.

G47214: Alkyl nitrate formation neglected.

G47218: Alkyl nitrate formation neglected.

G47222: Alkyl nitrate formation neglected.

G47223: ROO<sub>6</sub>R<sub>3</sub>OOH produced but no sink for it.

G47225: ROO<sub>6</sub>R<sub>4</sub>P produced but no sink for it.

G47226: ROO<sub>6</sub>R<sub>5</sub>P produced but no sink for it

G47400: Merged.

G47402a: KROPRIM\*O<sub>2</sub> fast reaction C<sub>6</sub>H<sub>5</sub>CH<sub>2</sub>O = BENZAL + HO<sub>2</sub>.

G47402b: KROPRIM\*O<sub>2</sub> fast reaction C<sub>6</sub>H<sub>5</sub>CH<sub>2</sub>O = BENZAL + HO<sub>2</sub>.

G47403: KROPRIM\*O<sub>2</sub> fast reaction C<sub>6</sub>H<sub>5</sub>CH<sub>2</sub>O = BENZAL + HO<sub>2</sub>.

G47404: KROPRIM\*O<sub>2</sub> fast reaction C<sub>6</sub>H<sub>5</sub>CH<sub>2</sub>O = BENZAL + HO<sub>2</sub>. C<sub>6</sub>H<sub>5</sub>CH<sub>2</sub>OH replaced with its oxidation product BENZAL.

G47405: Merged.

G47406: Merged.

G47407b: According to Birdsall et al. (2010), the branching ratio rbipero<sub>2</sub>.oh is set to 0.40 in order to take into account the OH-recycling and summed yield of butendial and methylbutendial.

G47408a: KDEC TLBIPERO  $\rightarrow$  .6 GLYOX + .4 MGLYOX + HO<sub>2</sub> + .2 ZCODC<sub>23</sub>DBCOD + .2 C<sub>5</sub>DICARB + .2 TLFUONE + .2 BZFUONE + .2 MALDIAL

G47408b: KDEC TLBIPERO  $\rightarrow$  .6 GLYOX + .4 MGLYOX + HO<sub>2</sub> + .2 ZCODC<sub>23</sub>DB COD + .2 C<sub>5</sub>DICARB + .2 TLFUONE + .2 BZFUONE + .2 MALDIAL

G47409: KDEC TLBIPERO  $\rightarrow$  .6 GLYOX + .4 MGLYOX + HO<sub>2</sub> + .2 ZCODC<sub>23</sub>DB COD + .2 C<sub>5</sub>DICARB + .2 TLFUONE + .2 BZFUONE + .2 MALDIAL

G47410: Only major channel and KDEC TLBIPERO  $\rightarrow$  .6 GLYOX + .4 MGLYOX + HO<sub>2</sub> + .2 ZCODC<sub>23</sub>DB COD + .2 C<sub>5</sub>DICARB + .2 TLFUONE + .2 BZFUONE + .2 MALDIAL

G47412: KDEC MGLOOB  $\rightarrow$  .125 CH<sub>3</sub>CHO + .695 CH<sub>3</sub>CO + .57 CO + .57 OH + .125 HO<sub>2</sub> + .18 MGLOO + .25 CO<sub>2</sub>

G47413: Merged.

G47418b: Reactions with KRO<sub>2</sub>HO<sub>2</sub> and KDEC CRESO  $\rightarrow$  .68 C<sub>5</sub>CO<sub>14</sub>OH + .68 GLYOX + HO<sub>2</sub> + .32 PTLQONE.

G47419: KDEC CRESO  $\rightarrow$  .68 C<sub>5</sub>CO<sub>14</sub>OH + .68 GLYOX + HO<sub>2</sub> + .32 PTLQONE

G47420: KDEC CRESO  $\rightarrow$  .68 C5CO14OH + .68 GLYOX + HO2 + .32 PTLQONE

G47421: KDEC CRESO  $\rightarrow$  .68 C5CO14OH + .68 GLYOX + HO2 + .32 PTLQONE and Only major channel.

G47422b: Reactions with KRO2HO2 and KDEC NCRESO  $\rightarrow$  C5CO14OH + GLYOX + NO2

G47423: KDEC NCRESO  $\rightarrow$  C5CO14OH + GLYOX + NO2

G47424: KDEC NCRESO  $\rightarrow$  C5CO14OH + GLYOX + NO2

G47425: KDEC NCRESO  $\rightarrow$  C5CO14OH + GLYOX + NO2 and Only major channel.

G47426: TOL1OHNO2 is a nitro-phenol

G47429: KDEC MCATECOOA  $\rightarrow$  MC3ODBCO2H + HCOCO2H + HO2 + OH

G47436: KFPAN  $\rightarrow$  k.CH3CO3\_NO2

G47438: Only major channel.

G47439b: Reactions with KRO2HO2 and KDEC TLEMUCO  $\rightarrow$  .5 C3DIALO2 + .5 CO2H3CHO + .5 EPXC4DIAL + .5 MGLYOX + .5 HO2

G47440b: KDEC TLEMUCO  $\rightarrow$  .5 C3DIALO2 + .5 CO2H3CHO + .5 EPXC4DIAL + .5 MGLYOX + .5 HO2

G47441: KDEC TLEMUCO  $\rightarrow$  .5 C3DIALO2 + .5 CO2H3CHO + .5 EPXC4DIAL + .5 MGLYOX + .5 HO2

G47442: KDEC TLEMUCO  $\rightarrow$  .5 C3DIALO2 + .5 CO2H3CHO + .5 EPXC4DIAL + .5 MGLYOX + .5 HO2 and Only major channel.

G47445: KFPAN  $\rightarrow$  k.CH3CO3\_NO2

G47447: Only major channel.

G47454: New channel.

G47479: New channel.

G47482b: Reactions with KRO2HO2 and KDEC NPTLQO  $\rightarrow$  C7CO4DB + NO2

G47483: KDEC NPTLQO  $\rightarrow$  C7CO4DB + NO2

G47484: KDEC NPTLQO  $\rightarrow$  C7CO4DB + NO2

G47485: KDEC NPTLQO  $\rightarrow$  C7CO4DB + NO2

G47486b: Reactions with KRO2HO2 and KDEC PTLQO  $\rightarrow$  C6CO2OHCO3

G47487: KDEC PTLQO  $\rightarrow$  C6CO2OHCO3

G47488: KDEC PTLQO  $\rightarrow$  C6CO2OHCO3

G47489: Only major channel. KDEC PTLQO  $\rightarrow$  C6CO2OHCO3.

G47494: New channel.

G47497b: Reactions with KRO2HO2 and KDEC MNCATECO  $\rightarrow$  NC4MDCO2H + HCOCO2H + NO2

G47498: KDEC MNCATECO  $\rightarrow$  NC4MDCO2H + HCOCO2H + NO2

G47499: KDEC MNCATECO  $\rightarrow$  NC4MDCO2H + HCOCO2H + NO2

G47501b: Reactions with KRO2HO2 and KDEC MNCATECO  $\rightarrow$  NC4MDCO2H + HCOCO2H + HO2

G47502: KDEC MNCATECO  $\rightarrow$  NC4MDCO2H + HCOCO2H + HO2

G47503: KDEC MNCATECO  $\rightarrow$  NC4MDCO2H + HCOCO2H + HO2

G47504: KDEC MNCATECO  $\rightarrow$  NC4MDCO2H + HCOCO2H + HO2

G47509b: Reactions with KRO2HO2 and KDEC NDNCRESO  $\rightarrow$  NC4MDCO2H + HNO3 + CO + CO + NO2

G47510: KDEC NDNCRESO  $\rightarrow$  NC4MDCO2H + HNO3 + CO + CO + NO2

G47511: KDEC NDNCRESO  $\rightarrow$  NC4MDCO2H + HNO3 + CO + CO + NO2

G47512: KDEC NDNCRESO  $\rightarrow$  NC4MDCO2H + HNO3 + CO + CO + NO2

G47513b: Reactions with KRO2HO2 and KDEC DNCRESO  $\rightarrow$  NC4MDCO2H + HCOCO2H + NO2

G47514: KDEC DNCRESO  $\rightarrow$  NC4MDCO2H + HCOCO2H + NO2

G47515: KDEC DNCRESO  $\rightarrow$  NC4MDCO2H + HCOCO2H + NO2

G47516: KDEC DNCRESO  $\rightarrow$  NC4MDCO2H + HCOCO2H + NO2

G48202: Alkyl nitrate formation neglected.

G48205: Alkyl nitrate formation neglected.

G48210: Alkyl nitrate formation neglected.

G48212: Alkyl nitrate formation neglected.

G48216: Alkyl nitrate formation neglected.

G48222: Alkyl nitrate formation neglected.

G48400a: Same products as for toluene. Assuming a 1:1:1 proportion in xylenes emissions the analogous toluene product is produced with a rate constant equal to  $(1.36E-11*0.24 + 2.31E-11*0.29 + 1.43E-11*0.155)/3$ , where k and coefficients are for the single isomers ortho, meta and para from MCM.

G48400b: Same products as for toluene. Assuming a 1:1:1 proportion in xylenes emissions the analogous toluene product is produced with a rate constant equal to  $(1.36E-11*0.05 + 2.31E-11*0.04 + 1.43E-11*0.10)/3$ , where k and coefficients are for the single isomers ortho, meta and para from MCM.

G48400c: Same products as for toluene. Assuming a 1:1:1 proportion in xylenes emissions the analogous toluene product is produced with a rate constant equal to  $(1.36E-11*0.16 + 2.31E-11*0.17 + 1.43E-11*0.12)/3$ ,

where k and coefficients are for the single isomers ortho, meta and para from MCM.

G48400d: Same products as for toluene. Assuming a 1:1:1 proportion in xylenes emissions the analogous toluene product is produced with a rate constant equal to  $(1.36E-11*0.55 + 2.31E-11*0.50 + 1.43E-11*0.625)/3$ , where k and coefficients are for the single isomers ortho, meta and para from MCM.

G48401: Same products as for toluene. The rate constant is the average of m, p, o  $k=(4.10E-16+2.60E-16+5.00E-16)/3 = 3.9E-16$ .

G48402: merged under same rate constant

G48403: Same products as for toluene

G48405:  $KDEC\ CH_2O_2 \rightarrow .24\ CH_2O + .40\ CO + .36\ HO_2 + .36\ CO + .36\ OH$  and  $H_2O_{subs}\ PHCHO \rightarrow .625\ PHCOOH + .375\ BENZAL + .375\ H_2O_2 + .2\ CO_2$

G48408:  $KDEC\ NSTYRENEO \rightarrow NO_2 + HCHO + BENZAL$

G48409:  $KDEC\ NSTYRENEO \rightarrow NO_2 + HCHO + BENZAL$

G48410:  $KDEC\ NSTYRENEO \rightarrow NO_2 + HCHO + BENZAL$

G48412b:  $KDEC\ STYRENO \rightarrow HO_2 + HCHO + BENZAL$  and reactions with  $KRO_2HO_2$ .

G48413:  $KDEC\ STYRENO \rightarrow HO_2 + HCHO + BENZAL$

G48414:  $KDEC\ STYRENO \rightarrow HO_2 + HCHO + BENZAL$

G48415:  $KDEC\ STYRENO \rightarrow HO_2 + HCHO + BENZAL$

G49207: Alkyl nitrate formation neglected.

G49238: Alkyl nitrate formation neglected.

G49246: Only this channel considered as the intermediate radical is likely more stable than  $CHCH(OH)_2$ . Instead of the (lacking) carbonyl a product of further degradation is assumed.

G49247: Theoretical keto-enol tautomerization catalyzed by formic acid (Grenfell et al., 2006).

G49248: Theoretical keto-enol tautomerization catalyzed by formic acid (Grenfell et al., 2006).

G49400a: Same products as for toluene. Assuming a 1:1:1 proportion in xylenes emissions the analogous toluene product is produced with a rate constant equal to  $(3.27E-11*0.21 + 3.25E-11*0.30 + 5.67E-11*0.14)/3$ , where k and coefficients are for the single isomers 1,2,3-, 1,3,4- and 1,3,5- from MCM.

G49400b: Same products as for toluene. Assuming a 1:1:1 proportion in xylenes emissions the analogous toluene product is produced with a rate constant equal to  $(3.27E-11*0.06 + 3.25E-11*0.06 + 5.67E-11*0.03)/3$ , where k and coefficients are for the single isomers 1,2,3-, 1,3,4- and 1,3,5- from MCM.

G49400c: Same products as for toluene. Assuming a 1:1:1 proportion in xylenes emissions the analogous toluene product is produced with a rate constant equal to  $(3.27E-11*0.03 + 3.25E-11*0.03 + 5.67E-11*0.04)/3$ , where k and coefficients are for the single isomers 1,2,3-, 1,3,4- and 1,3,5- from MCM.

G49400d: Same products as for toluene. Assuming a 1:1:1 proportion in xylenes emissions the analogous toluene product is produced with a rate constant equal to  $(3.27E-11*0.70 + 3.25E-11*0.61 + 5.67E-11*0.79)/3$ , where k and coefficients are for the single isomers 1,2,3-, 1,3,4- and 1,3,5- from MCM.

G49401: Same products as for toluene. The rate constant is the average of m, p, o  $k=(1.90+1.80+0.88)E-15/3=1.52E-15$ .

G40200: Products from Vereecken et al. (2007).  $LAP-INABO_2 = .65\ APINAO_2 + .35\ APINBO_2$

G40203: Weighted average for isomers A and B,  $k = 0.33*9.20E-14+0.67*8.80E-13$ .

G40204: Weighted average for isomers A and B,  $k = 0.35*1.83E-11+0.65*3.28E-11$ .

G40205: Weighted average for isomers A and B,  $k = 0.35*5.50E-12+0.65*3.64E-12$ .

G40206: SAR-estimated rate constant,  $(k_{ads}+k_{adt})*aco_3 = 6.46E-11$  where  $k_{ads} = 3.0E-11$ ,  $k_{adt} = 5.5E-11$ ,  $aco_3 = 0.76$

G40207: Alkyl nitrate formation neglected.

G40211: Products from Rickard and Pascoe (2009).

G40212: Products from Rickard and Pascoe (2009).

G40232: Products from Capouet et al. (2008).

G40242: Alkyl nitrate formation neglected.

G40246: Products from Rickard and Pascoe (2009).

G40248: Alkyl nitrate formation neglected.

G40252a: Products from Vereecken and Peeters (2012).

G40252b: Products from Vereecken and Peeters (2012).

G40259:  $ROO_6R_1OOH$  is produced but no sink for it.

G40262:  $RO_6R_1OOH$  is produced but no sink for it.

G40266: Rate constant modified according to MCM protocol.

G40267a: Products from Nguyen et al. (2009).

G40268: Products from Rickard and Pascoe (2009).

G40270: Alkyl nitrate neglected.

G40274: As for  $RO_6R_1NO_3$  in G4085.

G40276: Only this channel considered as the intermediate radical is likely more stable than  $CHCH(OH)_2$ .

- G40277: Theoretical keto-enol tautomerization catalyzed by formic acid (Grenfell et al., 2006).
- G40278: Theoretical keto-enol tautomerization catalyzed by formic acid (Grenfell et al., 2006).
- G40282a: Products from Vereecken and Peeters (2012).
- G40282b: Products from Vereecken and Peeters (2012).
- G40283a: Products from Nguyen et al. (2009).
- G40284: Products from Rickard and Pascoe (2009).
- G40285a: Products from Vereecken and Peeters (2012).
- G40285b: Products from Vereecken and Peeters (2012).
- G40286a: Products from Nguyen et al. (2009).
- G40287: Products from Rickard and Pascoe (2009).
- G40400: DIET35TOL(from MCM) as representative of higher aromatics
- G40401: Same products as for toluene.
- G6103: The rate coefficient is defined as backward reaction divided by equilibrium constant.
- G6204: At low temperatures, there may be a minor reaction channel leading to O<sub>3</sub>+HCl. See Finkbeiner et al. (1995) for details. It is neglected here.
- G6402: The initial products are probably HCl and CH<sub>2</sub>OOH (Atkinson et al., 2006). It is assumed that CH<sub>2</sub>OOH dissociates into HCHO and OH.
- G6405: Average of reactions with CH<sub>3</sub>Br and CH<sub>3</sub>F from Sander et al. (2006) (B. Steil, pers. comm.).
- G6407: Rough extrapolation from reactions with CH<sub>3</sub>CF<sub>3</sub>, CH<sub>3</sub>CClF<sub>2</sub>, and CH<sub>3</sub>CCl<sub>2</sub>F from Sander et al. (2006).
- G6409: It is assumed that the reaction liberates all Cl atoms in the form of HCl.
- G7302: The rate coefficient is:  $k_{\text{BrO}_2} = k_{\text{3rd}}(\text{temp}, \text{cair}, 5.2\text{E}-31, 3.2, 6.9\text{E}-12, 2.9, 0.6)$ .
- G7303: The rate coefficient is defined as backward reaction (Atkinson et al., 2007) divided by equilibrium constant (Orlando and Tyndall, 1996).
- G7404: It is assumed that the reaction liberates all Br atoms in the form of HBr.
- G7407: It is assumed that the reaction liberates all Br atoms. The fate of the carbon atom is currently not considered.
- G7408: It is assumed that the reaction liberates all Br atoms. The fate of the carbon atom is currently not considered.
- G7605: Same value as for G7408: CH<sub>2</sub>Br<sub>2</sub>+OH assumed. It is assumed that the reaction liberates all Br atoms but not Cl. The fate of the carbon atom is currently not considered.
- G7606: Same value as for G7408: CH<sub>2</sub>Br<sub>2</sub>+OH assumed. It is assumed that the reaction liberates all Br atoms but not Cl. The fate of the carbon atom is currently not considered.
- G7607: It is assumed that the reaction liberates all Br atoms but not Cl. The fate of the carbon atom is currently not considered.
- G8102: It is assumed that the reaction produces new particles.
- G8103: The yield of 38 % OIO is from Atkinson et al. (2007). It is assumed here that the remaining 62 % produce 2 I + O<sub>2</sub>.
- G8300: The rate coefficient is:  $k_{\text{I}_2} = k_{\text{3rd\_iupac}}(\text{temp}, \text{cair}, 3.0\text{E}-31, 1., 6.6\text{E}-11, 0., 0.63)$ .
- G8305: The rate coefficient is defined as backward reaction (Atkinson et al., 2007) divided by equilibrium constant (van den Bergh and Troe, 1976).
- G8306: According to John Plane and John Crowley (pers. comm. 2007), the rate coefficient of  $1.1\text{E}15*\text{EXP}(-12060./\text{temp})$  suggested by Atkinson et al. (2007) is wrong.
- G8401: The rate coefficient is from Dillon et al. (2006b), the yield of I atoms is a lower limit given on page 2170 of Bale et al. (2005).
- G8402: The products are from Nakano et al. (2005).
- G8701: 80% Br + OIO production is from Atkinson et al. (2007). The remaining channels are assumed to produce Br + I + O<sub>2</sub>.
- G9400a: For the abstraction path, the assumed reaction sequence (omitting H<sub>2</sub>O and O<sub>2</sub> as products) according to Yin et al. (1990) is:
- $$\begin{array}{l} \text{DMS} + \text{OH} \rightarrow \text{CH}_3\text{SCH}_2 \\ \text{CH}_3\text{SCH}_2 + \text{O}_2 \rightarrow \text{CH}_3\text{SCH}_2\text{OO} \\ \text{CH}_3\text{SCH}_2\text{OO} + \text{NO} \rightarrow \text{CH}_3\text{SCH}_2\text{O} + \text{NO}_2 \\ \text{CH}_3\text{SCH}_2\text{O} \rightarrow \text{CH}_3\text{S} + \text{HCHO} \\ \text{CH}_3\text{S} + \text{O}_3 \rightarrow \text{CH}_3\text{SO} \\ \text{CH}_3\text{SO} + \text{O}_3 \rightarrow \text{CH}_3\text{SO}_2 \\ \hline \text{DMS} + \text{OH} + \text{NO} + 2\text{O}_3 \rightarrow \text{CH}_3\text{SO}_2 + \text{HCHO} + \text{NO}_2 \end{array}$$
- Neglecting the effect on O<sub>3</sub> and NO<sub>x</sub>, the remaining reaction is:
- $$\text{DMS} + \text{OH} + \text{O}_3 \rightarrow \text{CH}_3\text{SO}_2 + \text{HCHO}$$
- G9400b: For the addition path, the rate coefficient is:  $k_{\text{DMS\_OH}} = 1.0\text{E}-39*\text{EXP}(5820./\text{temp})*\text{C}(\text{ind}_02) / (1.+5.0\text{E}-30*\text{EXP}(6280./\text{temp})*\text{C}(\text{ind}_02))$ .
- G9408: Average of 3.9E-11 and 3.42E-11.
- G10201: Upper limit.

Table 2: Photolysis reactions

| #       | labels    | reaction                                                               | rate coefficient                           | reference            |
|---------|-----------|------------------------------------------------------------------------|--------------------------------------------|----------------------|
| J0001   | UpGJ      | $O(^3P) \rightarrow O^+ + e^-$                                         | $jx(ip\_0p\_em) + jx(ip\_se\_0p\_em)$      | Fuller-Rowell (1993) |
| J0002a  | UpGJ      | $O_2 \rightarrow O_2^+ + e^-$                                          | $jx(ip\_02p\_em) + jx(ip\_se\_02\_b1)$     | Fuller-Rowell (1993) |
| J0002b  | UpGJ      | $O_2 \rightarrow O^+ + O(^3P) + e^-$                                   | $jx(ip\_0p\_0\_em) + jx(ip\_se\_02\_b2)$   | Fuller-Rowell (1993) |
| J0003a  | UpGJN     | $N_2 \rightarrow N_2^+ + e^-$                                          | $jx(ip\_N2p\_em) + jx(ip\_se\_N2\_b1)$     | Fuller-Rowell (1993) |
| J0003b  | UpGJN     | $N_2 \rightarrow N^+ + N + e^-$                                        | $jx(ip\_Np\_N\_em) + jx(ip\_se\_N2\_b2)$   | Fuller-Rowell (1993) |
| J0003c  | UpGJN     | $N_2 \rightarrow N^+ + N(^2D) + e^-$                                   | $jx(ip\_Np\_N2D\_em) + jx(ip\_se\_N2\_b3)$ | Fuller-Rowell (1993) |
| J0003d  | UpGJN     | $N_2 \rightarrow N + N(^2D)$                                           | $jx(ip\_N\_N2D\_em) + jx(ip\_se\_N2\_b4)$  | Fuller-Rowell (1993) |
| J1000a  | UpStTrGJ  | $O_2 + h\nu \rightarrow O(^3P) + O(^3P)$                               | $jx(ip\_02)$                               | Sander et al. (2014) |
| J1000b  | UpGJ      | $O_2 + h\nu \rightarrow O(^3P) + O(^1D)$                               | $jx(ip\_03P01D)$                           | Sander et al. (2014) |
| J1000c  | UpGJ      | $O_2 + h\nu \rightarrow O_2^+ + e^-$                                   | $jx(ip\_02\_b1)$                           | Sander et al. (2014) |
| J1000d  | UpGJ      | $O_2 + h\nu \rightarrow O^+ + O(^3P) + e^-$                            | $jx(ip\_02\_b2)$                           | Sander et al. (2014) |
| J1001a  | UpStTrGJ  | $O_3 + h\nu \rightarrow O(^1D) + O_2$                                  | $jx(ip\_01D)$                              | Sander et al. (2014) |
| J1001b  | UpStTrGJ  | $O_3 + h\nu \rightarrow O(^3P) + O_2$                                  | $jx(ip\_03P)$                              | Sander et al. (2014) |
| J1002   | UpGJ      | $O(^3P) + h\nu \rightarrow O^+ + e^-$                                  | $jx(ip\_03Pp)$                             | Sander et al. (2014) |
| J2100a  | UpStGJ    | $H_2O + h\nu \rightarrow H + OH$                                       | $jx(ip\_H2O)$                              | Sander et al. (2014) |
| J2100b  | UpGJ      | $H_2O + h\nu \rightarrow H_2 + O(^1D)$                                 | $jx(ip\_H2O1D)$                            | Sander et al. (2014) |
| J2101   | UpStTrGJ  | $H_2O_2 + h\nu \rightarrow 2 OH$                                       | $jx(ip\_H2O2)$                             | Sander et al. (2014) |
| J3000a  | UpGJN     | $N_2 + h\nu \rightarrow N_2^+ + e^-$                                   | $jx(ip\_N2\_b1)$                           | Sander et al. (2014) |
| J3000b  | UpGJN     | $N_2 + h\nu \rightarrow N^+ + N + e^-$                                 | $jx(ip\_N2\_b2)$                           | Sander et al. (2014) |
| J3000c  | UpGJN     | $N_2 + h\nu \rightarrow N^+ + N(^2D) + e^-$                            | $jx(ip\_N2\_b3)$                           | Sander et al. (2014) |
| J3000d  | UpGJN     | $N_2 + h\nu \rightarrow N + N(^2D)$                                    | $jx(ip\_NN2D)$                             | Sander et al. (2014) |
| J3100   | UpStGJN   | $N_2O + h\nu \rightarrow O(^1D) + N_2$                                 | $jx(ip\_N2O)$                              | Sander et al. (2014) |
| J3101   | UpStTrGJN | $NO_2 + h\nu \rightarrow NO + O(^3P)$                                  | $jx(ip\_N02)$                              | Sander et al. (2014) |
| J3102a  | UpStGJN   | $NO + h\nu \rightarrow N + O(^3P)$                                     | $jx(ip\_NO)$                               | Sander et al. (2014) |
| J3102b  | UpGJN     | $NO + h\nu \rightarrow NO^+ + e^-$                                     | $jx(ip\_N0p)$                              | Sander et al. (2014) |
| J3103a  | UpStTrGJN | $NO_3 + h\nu \rightarrow NO_2 + O(^3P)$                                | $jx(ip\_N02O)$                             | Sander et al. (2014) |
| J3103b  | UpStTrGJN | $NO_3 + h\nu \rightarrow NO + O_2$                                     | $jx(ip\_N002)$                             | Sander et al. (2014) |
| J3104   | StTrGJN   | $N_2O_5 + h\nu \rightarrow NO_2 + NO_3$                                | $jx(ip\_N205)$                             | Sander et al. (2014) |
| J3200   | TrGJN     | $HONO + h\nu \rightarrow NO + OH$                                      | $jx(ip\_HONO)$                             | Sander et al. (2014) |
| J3201   | StTrGJN   | $HNO_3 + h\nu \rightarrow NO_2 + OH$                                   | $jx(ip\_HNO3)$                             | Sander et al. (2014) |
| J3202   | StTrGJN   | $HNO_4 + h\nu \rightarrow .667 NO_2 + .667 HO_2 + .333 NO_3 + .333 OH$ | $jx(ip\_HNO4)$                             | Sander et al. (2014) |
| J41000  | StTrGJ    | $CH_3OOH + h\nu \rightarrow CH_3O + OH$                                | $jx(ip\_CH3OOH)$                           | Sander et al. (2014) |
| J41001a | StTrGJ    | $HCHO + h\nu \rightarrow H_2 + CO$                                     | $jx(ip\_COH2)$                             | Sander et al. (2014) |
| J41001b | StTrGJ    | $HCHO + h\nu \rightarrow H + CO + HO_2$                                | $jx(ip\_CHOH)$                             | Sander et al. (2014) |

Table 2: Photolysis reactions (... continued)

| #       | labels  | reaction                                                                                                                                                                                                                                                       | rate coefficient                                                | reference                                     |
|---------|---------|----------------------------------------------------------------------------------------------------------------------------------------------------------------------------------------------------------------------------------------------------------------|-----------------------------------------------------------------|-----------------------------------------------|
| J41002  | StGJ    | $\text{CO}_2 + h\nu \rightarrow \text{CO} + \text{O}(^3\text{P})$                                                                                                                                                                                              | $\text{jx}(\text{ip\_CO2})$                                     | Sander et al. (2014)                          |
| J41003  | StGJ    | $\text{CH}_4 + h\nu \rightarrow .42 \text{CH}_3 + .42 \text{H} + .6912 \text{H}_2 + .0864 \text{HCHO} + .0864 \text{O}(^3\text{P}) + .1584 \text{OH} + .1584 \text{HO}_2 + .2112 \text{CO}_2 + .1824 \text{CO} + .024 \text{H}_2\text{O} + .10 \text{LCARBON}$ | $\text{jx}(\text{ip\_CH4})$                                     | Sander et al. (2014)*                         |
| J41004  | StTrGJN | $\text{CH}_3\text{ONO} + h\nu \rightarrow \text{CH}_3\text{O} + \text{NO}$                                                                                                                                                                                     | $\text{jx}(\text{ip\_CH3ONO})$                                  | Sander et al. (2014)                          |
| J41005  | StTrGJN | $\text{CH}_3\text{ONO}_2 + h\nu \rightarrow \text{CH}_3\text{O} + \text{NO}_2$                                                                                                                                                                                 | $\text{jx}(\text{ip\_CH3NO3})$                                  | Sander et al. (2014)                          |
| J41006  | StTrGJN | $\text{CH}_3\text{O}_2\text{NO}_2 + h\nu \rightarrow .667 \text{NO}_2 + .667 \text{CH}_3\text{O}_2 + .333 \text{NO}_3 + .333 \text{CH}_3\text{O}$                                                                                                              | $\text{jx}(\text{ip\_CH3O2NO2})$                                | Sander et al. (2014)*                         |
| J41007  | StTrGJ  | $\text{HOCH}_2\text{OOH} + h\nu \rightarrow \text{HCOOH} + \text{OH} + \text{HO}_2$                                                                                                                                                                            | $\text{jx}(\text{ip\_CH300H})$                                  | Sander et al. (2014)                          |
| J41008  | StTrGJ  | $\text{CH}_3\text{O}_2 + h\nu \rightarrow \text{HCHO} + \text{OH}$                                                                                                                                                                                             | $\text{jx}(\text{ip\_CH302})$                                   | Sander et al. (2014)                          |
| J41009  | StTrGJ  | $\text{HCOOH} + h\nu \rightarrow \text{CO} + \text{HO}_2 + \text{OH}$                                                                                                                                                                                          | $\text{jx}(\text{ip\_HCOOH})$                                   | Sander et al. (2014)                          |
| J41010  | StTrGJN | $\text{HOCH}_2\text{O}_2\text{NO}_2 + h\nu \rightarrow .667 \text{NO}_2 + .667 \text{HOCH}_2\text{O}_2 + .333 \text{NO}_3 + .333 \text{HCOOH} + .333 \text{HO}_2$                                                                                              | $\text{jx}(\text{ip\_CH3O2NO2})$                                | Sander et al. (2014)                          |
| J42000  | TrGJC   | $\text{C}_2\text{H}_5\text{OOH} + h\nu \rightarrow \text{CH}_3\text{CHO} + \text{HO}_2 + \text{OH}$                                                                                                                                                            | $\text{jx}(\text{ip\_CH300H})$                                  | von Kuhlmann (2001)                           |
| J42001a | TrGJC   | $\text{CH}_3\text{CHO} + h\nu \rightarrow \text{CH}_3 + \text{HO}_2 + \text{CO}$                                                                                                                                                                               | $\text{jx}(\text{ip\_CH3CHO})$                                  | Sander et al. (2014)                          |
| J42001b | TrGJC   | $\text{CH}_3\text{CHO} + h\nu \rightarrow \text{CH}_2\text{CHOH}$                                                                                                                                                                                              | $\text{jx}(\text{ip\_CH3CHO2VINY})$                             | Clubb et al. (2012)                           |
| J42002  | TrGJC   | $\text{CH}_3\text{C}(\text{O})\text{OOH} + h\nu \rightarrow \text{CH}_3 + \text{OH} + \text{CO}_2$                                                                                                                                                             | $\text{jx}(\text{ip\_CH3CO3H})$                                 | Sander et al. (2014)                          |
| J42004  | TrGJCN  | $\text{PAN} + h\nu \rightarrow .7 \text{CH}_3\text{C}(\text{O}) + .7 \text{NO}_2 + .3 \text{CH}_3 + .3 \text{CO}_2 + .3 \text{NO}_3$                                                                                                                           | $\text{jx}(\text{ip\_PAN})$                                     | Sander et al. (2014),<br>Sander et al. (2011) |
| J42005a | TrGJC   | $\text{HOCH}_2\text{CHO} + h\nu \rightarrow \text{HCHO} + 2 \text{HO}_2 + \text{CO}$                                                                                                                                                                           | $\text{jx}(\text{ip\_HOCH2CHO}) * 0.83$                         | Sander et al. (2011)                          |
| J42005b | TrGJC   | $\text{HOCH}_2\text{CHO} + h\nu \rightarrow \text{OH} + \text{HCOCH}_2\text{O}_2$                                                                                                                                                                              | $\text{jx}(\text{ip\_HOCH2CHO}) * 0.07$                         | Sander et al. (2011)                          |
| J42005c | TrGJC   | $\text{HOCH}_2\text{CHO} + h\nu \rightarrow \text{CH}_3\text{OH} + \text{CO}$                                                                                                                                                                                  | $\text{jx}(\text{ip\_HOCH2CHO}) * 0.10$                         | Sander et al. (2011)                          |
| J42006  | TrGJC   | $\text{HOCH}_2\text{CO}_3\text{H} + h\nu \rightarrow \text{HCHO} + \text{HO}_2 + \text{OH} + \text{CO}_2$                                                                                                                                                      | $\text{jx}(\text{ip\_CH300H})$                                  | Rickard and Pascoe (2009)                     |
| J42007  | TrGJCN  | $\text{PHAN} + h\nu \rightarrow .7 \text{HOCH}_2\text{CO} + .7 \text{NO}_2 + .3 \text{HCHO} + .3 \text{HO}_2 + .3 \text{CO}_2 + .3 \text{NO}_3$                                                                                                                | $\text{jx}(\text{ip\_PAN})$                                     | see note*                                     |
| J42008  | TrGJC   | $\text{GLYOX} + h\nu \rightarrow 2 \text{CO} + 2 \text{HO}_2$                                                                                                                                                                                                  | $\text{jx}(\text{ip\_GLYOX})$                                   | Sander et al. (2014)                          |
| J42009  | TrGJC   | $\text{HCOCO}_2\text{H} + h\nu \rightarrow 2 \text{HO}_2 + \text{CO} + \text{CO}_2$                                                                                                                                                                            | $\text{jx}(\text{ip\_MGLYOX})$                                  | Rickard and Pascoe (2009)                     |
| J42010  | TrGJC   | $\text{HCOCO}_3\text{H} + h\nu \rightarrow \text{HO}_2 + \text{CO} + \text{OH} + \text{CO}_2$                                                                                                                                                                  | $\text{jx}(\text{ip\_CH300H}) + \text{jx}(\text{ip\_HOCH2CHO})$ | Rickard and Pascoe (2009)                     |
| J42011  | TrGJC   | $\text{HYETHO}_2\text{H} + h\nu \rightarrow \text{HOCH}_2\text{CH}_2\text{O} + \text{OH}$                                                                                                                                                                      | $\text{jx}(\text{ip\_CH300H})$                                  | Rickard and Pascoe (2009)                     |
| J42012  | TrGJCN  | $\text{ETHOHNO}_3 + h\nu \rightarrow \text{HO}_2 + 2 \text{HCHO} + \text{NO}_2$                                                                                                                                                                                | $\text{J\_IC3H7N03}$                                            | Rickard and Pascoe (2009)                     |
| J42013  | TrGJC   | $\text{HOOCH}_2\text{CO}_3\text{H} + h\nu \rightarrow \text{OH} + \text{HCHO} + \text{CO}_2 + \text{OH}$                                                                                                                                                       | $2 * \text{jx}(\text{ip\_CH300H})$                              | Taraborrelli (2016)                           |
| J42014  | TrGC    | $\text{HOOCH}_2\text{CO}_2\text{H} + h\nu \rightarrow \text{OH} + \text{HCHO} + \text{HO}_2 + \text{CO}_2$                                                                                                                                                     | $\text{jx}(\text{ip\_CH300H})$                                  | Taraborrelli (2016)                           |
| J42015  | TrGC    | $\text{CH}_2\text{CO} + h\nu \rightarrow .4 \text{CO}_2 + .8 \text{H} + .34 \text{CO} + .34 \text{OH} + .34 \text{HO}_2 + .16 \text{HCHO} + .16 \text{O}(^3\text{P}) + .1 \text{HCOOH} + \text{CO}$                                                            | $\text{J\_ketene} * 0.36$                                       | Taraborrelli (2016)                           |
| J42016  | TrGC    | $\text{CH}_3\text{CHOHOH} + h\nu \rightarrow \text{CH}_3 + \text{HCOOH} + \text{OH}$                                                                                                                                                                           | $\text{jx}(\text{ip\_CH300H})$                                  | Taraborrelli (2016)                           |

Table 2: Photolysis reactions (... continued)

| #      | labels   | reaction                                                                                                                                                                                                                                                                                                                          | rate coefficient                                                                                                                                                                                             | reference                                     |
|--------|----------|-----------------------------------------------------------------------------------------------------------------------------------------------------------------------------------------------------------------------------------------------------------------------------------------------------------------------------------|--------------------------------------------------------------------------------------------------------------------------------------------------------------------------------------------------------------|-----------------------------------------------|
| J42017 | TrGJCN   | $\text{NO}_3\text{CH}_2\text{CHO} + h\nu \rightarrow \text{HO}_2 + \text{CO} + \text{HCHO} + \text{NO}_2$                                                                                                                                                                                                                         | $(\text{jx}(\text{ip\_C2H5N03}) + \text{jx}(\text{ip\_CH3CHO}))$<br>$*(\text{jx}(\text{ip\_NOA}) + 1\text{E-}10) / (0.59 * \text{J\_}$<br>$\text{IC3H7N03} + \text{jx}(\text{ip\_CH3COCH3}) + 1\text{E-}10)$ | Taraborrelli (2016)*                          |
| J42018 | TrGJC    | $\text{HOCH}_2\text{CHO} + h\nu \rightarrow \text{OH} + \text{HCHO} + \text{CO} + \text{HO}_2$                                                                                                                                                                                                                                    | $\text{jx}(\text{ip\_CH300H}) + \text{jx}(\text{ip\_HOCH2CHO})$                                                                                                                                              | Taraborrelli (2016)                           |
| J42019 | TrGJCN   | $\text{C}_2\text{H}_5\text{ONO}_2 + h\nu \rightarrow \text{CH}_3\text{CHO} + \text{HO}_2 + \text{NO}_2$                                                                                                                                                                                                                           | $\text{jx}(\text{ip\_C2H5N03})$                                                                                                                                                                              | Taraborrelli (2016)                           |
| J42020 | TrGJCN   | $\text{NO}_3\text{CH}_2\text{CHO} + h\nu \rightarrow .7 \text{NO}_3\text{CH}_2\text{CO}_3 + .7 \text{NO}_2 + .3 \text{HCHO} +$<br>$.3 \text{NO}_2 + .3 \text{CO}_2 + .3 \text{NO}_3$                                                                                                                                              | $\text{jx}(\text{ip\_PAN})$                                                                                                                                                                                  | Taraborrelli (2016)*                          |
| J42021 | StTrGJCN | $\text{C}_2\text{H}_5\text{O}_2\text{NO}_2 + h\nu \rightarrow .667 \text{NO}_2 + .667 \text{C}_2\text{H}_5\text{O}_2 + .333 \text{NO}_3 +$<br>$.333 \text{CH}_3\text{CHO} + .333 \text{HO}_2$                                                                                                                                     | $\text{jx}(\text{ip\_CH302N02})$                                                                                                                                                                             | Taraborrelli (2016)*                          |
| J43000 | TrGJC    | $\text{iC}_3\text{H}_7\text{OOH} + h\nu \rightarrow \text{CH}_3\text{COCH}_3 + \text{HO}_2 + \text{OH}$                                                                                                                                                                                                                           | $\text{jx}(\text{ip\_CH300H})$                                                                                                                                                                               | von Kuhlmann (2001)                           |
| J43001 | TrGJC    | $\text{CH}_3\text{COCH}_3 + h\nu \rightarrow \text{CH}_3\text{C}(\text{O}) + \text{CH}_3$                                                                                                                                                                                                                                         | $\text{jx}(\text{ip\_CH3COCH3})$                                                                                                                                                                             | Sander et al. (2014)                          |
| J43002 | TrGJC    | $\text{CH}_3\text{COCH}_2\text{OH} + h\nu \rightarrow .5 \text{CH}_3\text{C}(\text{O}) + .5 \text{HCHO} + .5 \text{HO}_2 + .5$<br>$\text{HOCH}_2\text{CO} + .5 \text{CH}_3$                                                                                                                                                       | $\text{J\_ACETOL}$                                                                                                                                                                                           | Sander et al. (2011)*                         |
| J43003 | TrGJC    | $\text{MGLYOX} + h\nu \rightarrow \text{CH}_3\text{C}(\text{O}) + \text{CO} + \text{HO}_2$                                                                                                                                                                                                                                        | $\text{jx}(\text{ip\_MGLYOX})$                                                                                                                                                                               | Sander et al. (2014)                          |
| J43004 | TrGJC    | $\text{CH}_3\text{COCH}_2\text{O}_2\text{H} + h\nu \rightarrow \text{CH}_3\text{C}(\text{O}) + \text{HCHO} + \text{OH}$                                                                                                                                                                                                           | $\text{jx}(\text{ip\_CH300H}) + \text{J\_ACETOL}$                                                                                                                                                            | Rickard and Pascoe (2009)                     |
| J43005 | TrGJC    | $\text{HOCH}_2\text{COCH}_2\text{OOH} + h\nu \rightarrow \text{HOCH}_2\text{CO} + \text{HCHO} + \text{OH}$                                                                                                                                                                                                                        | $\text{jx}(\text{ip\_CH300H}) + \text{J\_ACETOL}$                                                                                                                                                            | Taraborrelli (2016)                           |
| J43006 | TrGJCN   | $\text{iC}_3\text{H}_7\text{ONO}_2 + h\nu \rightarrow \text{CH}_3\text{COCH}_3 + \text{NO}_2 + \text{HO}_2$                                                                                                                                                                                                                       | $\text{J\_IC3H7N03}$                                                                                                                                                                                         | von Kuhlmann et al. (2003)*                   |
| J43007 | TrGJCN   | $\text{NOA} + h\nu \rightarrow \text{CH}_3\text{C}(\text{O}) + \text{HCHO} + \text{NO}_2$                                                                                                                                                                                                                                         | $\text{jx}(\text{ip\_NOA})$                                                                                                                                                                                  | Barnes et al. (1993)                          |
| J43009 | TrGJC    | $\text{HYPROPO}_2\text{H} + h\nu \rightarrow \text{CH}_3\text{CHO} + \text{HCHO} + \text{HO}_2 + \text{OH}$                                                                                                                                                                                                                       | $\text{jx}(\text{ip\_CH300H})$                                                                                                                                                                               | Rickard and Pascoe (2009)                     |
| J43010 | TrGJCN   | $\text{PR}_2\text{O}_2\text{HNO}_3 + h\nu \rightarrow \text{NOA} + \text{HO}_2 + \text{OH}$                                                                                                                                                                                                                                       | $\text{jx}(\text{ip\_CH300H})$                                                                                                                                                                               | Rickard and Pascoe (2009)                     |
| J43011 | TrGJC    | $\text{HOCH}_2\text{COCHO} + h\nu \rightarrow \text{HOCH}_2\text{CO} + \text{CO} + \text{HO}_2$                                                                                                                                                                                                                                   | $\text{jx}(\text{ip\_MGLYOX})$                                                                                                                                                                               | Rickard and Pascoe (2009)                     |
| J43012 | TrGJC    | $\text{HCOCOCH}_2\text{OOH} + h\nu \rightarrow \text{HCOCO} + \text{HCHO} + \text{OH}$                                                                                                                                                                                                                                            | $\text{jx}(\text{ip\_CH300H}) + \text{J\_ACETOL}$                                                                                                                                                            | Taraborrelli (2016)                           |
| J43013 | TrGJC    | $\text{HCOCOCH}_2\text{OOH} + h\nu \rightarrow \text{HOCH}_2\text{CO}_3 + \text{CO} + \text{HO}_2$                                                                                                                                                                                                                                | $\text{jx}(\text{ip\_MGLYOX})$                                                                                                                                                                               | Taraborrelli (2016)                           |
| J43014 | TrGJTerC | $\text{HCOCH}_2\text{CHO} + h\nu \rightarrow \text{HCOCH}_2\text{O}_2 + \text{HO}_2 + \text{CO}$                                                                                                                                                                                                                                  | $\text{jx}(\text{ip\_HOCH2CHO}) * 2.$                                                                                                                                                                        | Rickard and Pascoe (2009)                     |
| J43015 | TrGJTerC | $\text{HCOCH}_2\text{CO}_2\text{H} + h\nu \rightarrow \text{HCOCH}_2\text{O}_2 + \text{CO}_2 + \text{HO}_2$                                                                                                                                                                                                                       | $\text{jx}(\text{ip\_HOCH2CHO})$                                                                                                                                                                             | Rickard and Pascoe (2009)                     |
| J43016 | TrGJTerC | $\text{HOC}_2\text{H}_4\text{CO}_3\text{H} + h\nu \rightarrow \text{HOCH}_2\text{CH}_2\text{O}_2 + \text{CO}_2 + \text{OH}$                                                                                                                                                                                                       | $\text{jx}(\text{ip\_CH300H})$                                                                                                                                                                               | Rickard and Pascoe (2009)                     |
| J43017 | TrGJC    | $\text{HCOCOCHO} + h\nu \rightarrow \text{HCOCO} + \text{HO}_2 + \text{CO}$                                                                                                                                                                                                                                                       | $2 * \text{jx}(\text{ip\_MGLYOX})$                                                                                                                                                                           | Taraborrelli (2016)                           |
| J43018 | TrGJC    | $\text{CH}_3\text{COCO}_2\text{H} + h\nu \rightarrow .32 \text{CH}_3\text{CHO} + .16 \text{CH}_2\text{CHOH} + .54 \text{CO}_2$<br>$+ .38 \text{CH}_3\text{C}(\text{O}) + .38 \text{HO}_2 + .38 \text{CO}_2 + .07 \text{CH}_3\text{COOH} + .07$<br>$\text{CO} + .05 \text{CH}_3\text{C}(\text{O}) + .05 \text{CO} + .05 \text{OH}$ | $\text{JX}(\text{IP\_CH3COC}_2\text{H})$                                                                                                                                                                     | Sander et al. (2011),<br>Taraborrelli (2016)* |
| J43019 | TrGC     | $\text{CH}_3\text{COCO}_3\text{H} + h\nu \rightarrow \text{CH}_3\text{C}(\text{O}) + \text{OH} + \text{CO}_2$                                                                                                                                                                                                                     | $\text{JX}(\text{IP\_MGLYOX}) + \text{jx}(\text{ip\_CH300H})$                                                                                                                                                | Taraborrelli (2016)                           |
| J43020 | TrGC     | $\text{CH}_3\text{CHCO} + h\nu \rightarrow \text{C}_2\text{H}_4 + \text{CO}$                                                                                                                                                                                                                                                      | $\text{J\_ketene} * 0.36 * 2.$                                                                                                                                                                               | Taraborrelli (2016)                           |
| J43021 | TrGCN    | $\text{PROPOLNO}_3 + h\nu \rightarrow \text{HOCH}_2\text{CHO} + \text{HCHO} + \text{HO}_2 + \text{NO}_2$                                                                                                                                                                                                                          | $\text{J\_IC3H7N03}$                                                                                                                                                                                         | Taraborrelli (2016)                           |
| J43022 | TrGCN    | $\text{CH}_3\text{COCH}_2\text{OONO}_2 + h\nu \rightarrow \text{CH}_3\text{C}(\text{O}) + \text{HCHO} + \text{NO}_3$                                                                                                                                                                                                              | $\text{jx}(\text{ip\_CH302N02}) + \text{jx}(\text{ip\_CH3COCH3})$                                                                                                                                            | Taraborrelli (2016)                           |

Table 2: Photolysis reactions (... continued)

| #       | labels   | reaction                                                                                               | rate coefficient                          | reference                                         |
|---------|----------|--------------------------------------------------------------------------------------------------------|-------------------------------------------|---------------------------------------------------|
| J43023  | TrGJC    | $C_3H_7OOH + h\nu \rightarrow C_2H_5CHO + HO_2 + OH$                                                   | $jx(ip\_CH300H)$                          | von Kuhlmann (2001)                               |
| J43024  | TrGJCN   | $C_3H_7ONO_2 + h\nu \rightarrow C_2H_5CHO + NO_2 + HO_2$                                               | $0.59 * J\_IC3H7N03$                      | see note*                                         |
| J43025a | TrGJC    | $C_2H_5CHO + h\nu \rightarrow C_2H_5O_2 + HO_2 + CO$                                                   | $jx(ip\_C2H5CHO2HCO)$                     | see note*                                         |
| J43025b | TrGJC    | $C_2H_5CHO + h\nu \rightarrow CH_2CHCH_2OH$                                                            | $jx(ip\_C2H5CHO2ENOL)$                    | Andrews et al. (2012),<br>Taraborrelli (2016)*    |
| J43026  | TrGJCN   | $PPN + h\nu \rightarrow .7 C_2H_5CO_3 + .7 NO_2 + .3 C_2H_5O_2 + .3 CO_2 + .3 NO_3$                    | $jx(ip\_PAN)$                             | Sander et al. (2014),<br>Sander et al. (2011)     |
| J43027  | TrGJC    | $C_2H_5CO_3H + h\nu \rightarrow C_2H_5O_2 + CO_2 + OH$                                                 | $jx(ip\_CH300H)$                          | von Kuhlmann (2001)                               |
| J43028a | TrGJC    | $HCOCOCH_2OOH + h\nu \rightarrow HOOCH_2CO_3 + CO + HO_2$                                              | $jx(ip\_MGLYOX)$                          | Taraborrelli (2016)                               |
| J43028b | TrGJC    | $HCOCOCH_2OOH + h\nu \rightarrow HCOCO + HCHO + OH$                                                    | $jx(ip\_HOCH2CHO) + jx(ip\_CH300H)$       | Taraborrelli (2016)                               |
| J43200  | TrGJTerC | $HCOCH_2CO_3H + h\nu \rightarrow HCOCH_2O_2 + CO_2 + OH$                                               | $jx(ip\_HOCH2CHO) + jx(ip\_CH300H)$       | Rickard and Pascoe (2009)                         |
| J43400  | TrGJAroC | $C3DIALOOH + h\nu \rightarrow GLYOX + CO + HO_2 + OH$                                                  | $jx(ip\_HOCH2CHO) * 2 + jx(ip\_CH300H)$   | Rickard and Pascoe (2009)*                        |
| J43401  | TrGJAroC | $C32OH13CO + h\nu \rightarrow GLYOX + HO_2 + HO_2 + CO$                                                | $jx(ip\_HOCH2CHO) * 2$                    | Rickard and Pascoe (2009)                         |
| J43402  | TrGJAroC | $HCOCOHCOC_3H + h\nu \rightarrow GLYOX + HO_2 + CO_2 + OH$                                             | $jx(ip\_CH300H)$                          | Rickard and Pascoe (2009)                         |
| J44000a | TrGJC    | $LC_4H_9OOH + h\nu \rightarrow OH + C_3H_7CHO + HO_2$                                                  | $jx(ip\_CH300H) * (k\_p / (k\_p + k\_s))$ | Rickard and Pascoe (2009),<br>Taraborrelli (2016) |
| J44000b | TrGJC    | $LC_4H_9OOH + h\nu \rightarrow OH + .636 MEK + .636 HO_2 + .364 CH_3CHO + .364 C_2H_5O_2$              | $jx(ip\_CH300H) * (k\_s / (k\_p + k\_s))$ | Rickard and Pascoe (2009),<br>Taraborrelli (2016) |
| J44001  | TrGJC    | $MVK + h\nu \rightarrow .5 C_3H_6 + .5 CH_3C(O) + .5 HCHO + CO + .5 HO_2$                              | $jx(ip\_MVK)$                             | Sander et al. (2014)                              |
| J44002  | TrGJC    | $MEK + h\nu \rightarrow CH_3C(O) + C_2H_5O_2$                                                          | $0.42 * jx(ip\_CHOH)$                     | von Kuhlmann et al. (2003)                        |
| J44003  | TrGJC    | $LMEKOOH + h\nu \rightarrow .62 CH_3C(O) + .62 CH_3CHO + .38 HCHO + .38 CO_2 + .38 HOCH_2CH_2O_2 + OH$ | $jx(ip\_CH300H) + 0.42 * jx(ip\_CHOH)$    | Taraborrelli (2016)                               |
| J44004  | TrGJC    | $BIACET + h\nu \rightarrow 2 CH_3C(O)$                                                                 | $2.15 * jx(ip\_MGLYOX)$                   | see note*                                         |
| J44005a | TrGJCN   | $LC4H9NO3 + h\nu \rightarrow NO_2 + C_3H_7CHO + HO_2$                                                  | $J\_IC3H7N03 * (k\_p / (k\_p + k\_s))$    | see note*                                         |
| J44005b | TrGJCN   | $LC4H9NO3 + h\nu \rightarrow NO_2 + MEK + HO_2$                                                        | $J\_IC3H7N03 * (k\_s / (k\_p + k\_s))$    | see note*                                         |
| J44006  | TrGJCN   | $MPAN + h\nu \rightarrow .7 MACO_3 + .7 NO_2 + .3 MACO_2 + .3 NO_3$                                    | $jx(ip\_PAN)$                             | see note*                                         |
| J44007a | TrGJC    | $CO_2H_3CO_3H + h\nu \rightarrow MGLYOX + HO_2 + OH + CO_2$                                            | $jx(ip\_CH300H)$                          | Rickard and Pascoe (2009)                         |
| J44007b | TrGJC    | $CO_2H_3CO_3H + h\nu \rightarrow CH_3C(O) + HO_2 + HCOCO_3H$                                           | $J\_ACETOL$                               | Rickard and Pascoe (2009)                         |
| J44008  | TrGJC    | $MACR + h\nu \rightarrow .5 MACO_3 + .5 CH_3C(O) + .5 HCHO + .5 CO + HO_2$                             | $jx(ip\_MACR)$                            | Sander et al. (2014)                              |



Table 2: Photolysis reactions (... continued)

| #       | labels   | reaction                                                                                                                                                                                                                                                        | rate coefficient                                                                                 | reference                                      |
|---------|----------|-----------------------------------------------------------------------------------------------------------------------------------------------------------------------------------------------------------------------------------------------------------------|--------------------------------------------------------------------------------------------------|------------------------------------------------|
| J44009  | TrGJC    | MACROOH + $h\nu$ → MACRO + OH                                                                                                                                                                                                                                   | $jx(ip\_CH300H)+2.77*jx(ip\_HOCH2CHO)$                                                           | Taraborrelli (2016)*                           |
| J44010  | TrGJC    | MACROH + $h\nu$ → CH <sub>3</sub> COCH <sub>2</sub> OH + CO + HO <sub>2</sub> + HO <sub>2</sub>                                                                                                                                                                 | $2.77*jx(ip\_HOCH2CHO)$                                                                          | see note*                                      |
| J44011  | TrGJC    | MACO3H + $h\nu$ → MACO2 + OH                                                                                                                                                                                                                                    | $jx(ip\_CH300H)$                                                                                 | Taraborrelli (2016)                            |
| J44012  | TrGJC    | LHMVKABOOH + $h\nu$ → .12 MGLYOX + .12 HO <sub>2</sub> + .88 CH <sub>3</sub> C(O) + .88 HOCH <sub>2</sub> CHO + .12 HCHO + OH                                                                                                                                   | $jx(ip\_CH300H)+J\_ACETOL$                                                                       | Taraborrelli (2016)                            |
| J44013  | TrGJC    | CO2H3CHO + $h\nu$ → MGLYOX + CO + HO <sub>2</sub> + HO <sub>2</sub>                                                                                                                                                                                             | $jx(ip\_HOCH2CHO)+J\_ACETOL$                                                                     | Taraborrelli (2016)                            |
| J44014  | TrGJC    | HO12CO3C4 + $h\nu$ → CH <sub>3</sub> C(O) + HOCH <sub>2</sub> CHO + HO <sub>2</sub>                                                                                                                                                                             | J\_ACETOL                                                                                        | Rickard and Pascoe (2009)                      |
| J44015  | TrGJC    | BIACETOH + $h\nu$ → CH <sub>3</sub> C(O) + HOCH <sub>2</sub> CO                                                                                                                                                                                                 | $2.15*jx(ip\_MGLYOX)$                                                                            | see note*                                      |
| J44016  | TrGC     | HCOCCH <sub>3</sub> CO + $h\nu$ → .5 OH + .5 CH <sub>3</sub> CHO + CO + .5 CH <sub>3</sub> CHCO + .5 CO                                                                                                                                                         | J\_KETENE                                                                                        | Taraborrelli (2016)                            |
| J44017a | TrGC     | CH <sub>3</sub> COCHCO + $h\nu$ → .0192 CH <sub>3</sub> COCO <sub>2</sub> H + .1848 H <sub>2</sub> O <sub>2</sub> + .2208 MGLYOX + .36 OH + .36 CO + .56 CH <sub>3</sub> C(O) + .2 CH <sub>3</sub> CHO + .2 CO <sub>2</sub> + .2 HCHO + .2 HO <sub>2</sub> + CO | J\_KETENE*0.5                                                                                    | Taraborrelli (2016),Rickard and Pascoe (2009)* |
| J44017b | TrGC     | CH <sub>3</sub> COCHCO + $h\nu$ → CH <sub>3</sub> CHCO + CO                                                                                                                                                                                                     | J\_KETENE*0.5                                                                                    | Taraborrelli (2016)                            |
| J44018a | TrGJC    | CH <sub>3</sub> COCOCHO + $h\nu$ → CH <sub>3</sub> C(O) + 2 CO + HO <sub>2</sub>                                                                                                                                                                                | $jx(ip\_MGLYOX)$                                                                                 | Taraborrelli (2016)                            |
| J44018b | TrGJC    | CH <sub>3</sub> COCOCHO + $h\nu$ → HCOCO + CH <sub>3</sub> C(O)                                                                                                                                                                                                 | $2.15*jx(ip\_MGLYOX)$                                                                            | Taraborrelli (2016)                            |
| J44019  | TrGJC    | CH <sub>3</sub> COCOCO <sub>2</sub> H + $h\nu$ → CH <sub>3</sub> C(O) + CO + CO <sub>2</sub> + HO <sub>2</sub>                                                                                                                                                  | $3.15*jx(ip\_MGLYOX)$                                                                            | Taraborrelli (2016)                            |
| J44020a | TrGJTerC | CH <sub>3</sub> COCOCH <sub>2</sub> OOH + $h\nu$ → CH <sub>3</sub> C(O) + OH + HCHO + CO                                                                                                                                                                        | $jx(ip\_CH300H)+J\_ACETOL$                                                                       | Rickard and Pascoe (2009)                      |
| J44020b | TrGJTerC | CH <sub>3</sub> COCOCH <sub>2</sub> OOH + $h\nu$ → CH <sub>3</sub> C(O) + HCOCO                                                                                                                                                                                 | $2.15*jx(ip\_MGLYOX)$                                                                            | Rickard and Pascoe (2009)                      |
| J44021  | TrGJTerC | C44OOH + $h\nu$ → HCOCH <sub>2</sub> CHO + CO <sub>2</sub> + HO <sub>2</sub> + OH                                                                                                                                                                               | $jx(ip\_CH300H)$                                                                                 | Rickard and Pascoe (2009)                      |
| J44022  | TrGJTerC | C413COOOH + $h\nu$ → HCOCH <sub>2</sub> CO <sub>3</sub> + HCHO + OH                                                                                                                                                                                             | $jx(ip\_CH300H)+jx(ip\_HOCH2CHO)+J\_ACETOL$                                                      | Rickard and Pascoe (2009)                      |
| J44023a | TrGJTerC | C4CODIAL + $h\nu$ → HCOCOCH <sub>2</sub> O <sub>2</sub> + HO <sub>2</sub> + CO                                                                                                                                                                                  | $jx(ip\_HOCH2CHO)$                                                                               | Rickard and Pascoe (2009)                      |
| J44023b | TrGJTerC | C4CODIAL + $h\nu$ → HCOCH <sub>2</sub> CO <sub>3</sub> + HO <sub>2</sub> + CO                                                                                                                                                                                   | $jx(ip\_MGLYOX)$                                                                                 | Rickard and Pascoe (2009)                      |
| J44024  | TrGJTerC | C312COCO3H + $h\nu$ → HCOCOCH <sub>2</sub> O <sub>2</sub> + CO <sub>2</sub> + OH                                                                                                                                                                                | $jx(ip\_CH300H)+jx(ip\_MGLYOX)$                                                                  | Rickard and Pascoe (2009)                      |
| J44025  | TrGJCN   | LMEKNO <sub>3</sub> + $h\nu$ → .62 CH <sub>3</sub> C(O) + .62 CH <sub>3</sub> CHO + .38 HCHO + .38 CO <sub>2</sub> + .38 HOCH <sub>2</sub> CH <sub>2</sub> O <sub>2</sub> + NO <sub>2</sub>                                                                     | $jx(ip\_MEKN03)$                                                                                 | Barnes et al. (1993), Taraborrelli (2016)*     |
| J44026  | TrGJCN   | MVKNO <sub>3</sub> + $h\nu$ → CH <sub>3</sub> C(O) + HOCH <sub>2</sub> CHO + NO <sub>2</sub>                                                                                                                                                                    | $jx(ip\_MEKN03)$                                                                                 | Barnes et al. (1993), Taraborrelli (2016)*     |
| J44027  | TrGJCN   | MACRN + $h\nu$ → CH <sub>3</sub> COCH <sub>2</sub> OH + CO + HO <sub>2</sub> + NO <sub>2</sub>                                                                                                                                                                  | $(2.84*J\_IC3H7N03+jx(ip\_CH3CHO))*(jx(ip\_MEKN03)+1E-10)/(J\_IC3H7N03+0.42*jx(ip\_CHOH)+1E-10)$ | Müller et al. (2014), Taraborrelli (2016)*     |
| J44028  | TrGJCN   | TC4H9NO <sub>3</sub> + $h\nu$ → CH <sub>3</sub> COCH <sub>3</sub> + CH <sub>3</sub> + NO <sub>2</sub>                                                                                                                                                           | $2.84*J\_IC3H7N03$                                                                               | Taraborrelli (2016)                            |
| J44029  | TrGJC    | TC <sub>4</sub> H <sub>9</sub> OOH + $h\nu$ → CH <sub>3</sub> COCH <sub>3</sub> + CH <sub>3</sub> + OH                                                                                                                                                          | $jx(ip\_CH300H)$                                                                                 | Taraborrelli (2016)                            |

Table 2: Photolysis reactions (... continued)

| #       | labels   | reaction                                                                                                                                   | rate coefficient                   | reference                                                                                           |
|---------|----------|--------------------------------------------------------------------------------------------------------------------------------------------|------------------------------------|-----------------------------------------------------------------------------------------------------|
| J44030  | TrGJCN   | $\text{IBUTOLBNO}_3 + h\nu \rightarrow \text{CH}_3\text{COCH}_3 + \text{HCHO} + \text{HO}_2 + \text{NO}_2$                                 | $2.84 * \text{J\_IC3H7N03}$        | Taraborrelli (2016)                                                                                 |
| J44031  | TrGJC    | $\text{IBUTOLBOOH} + h\nu \rightarrow \text{CH}_3\text{COCH}_3 + \text{HCHO} + \text{HO}_2 + \text{OH}$                                    | $\text{jx(ip\_CH300H)}$            | Taraborrelli (2016)                                                                                 |
| J44032  | TrGJC    | $\text{LBUT1ENOOH} + h\nu \rightarrow \text{C}_2\text{H}_5\text{CHO} + \text{HCHO} + \text{HO}_2 + \text{OH}$                              | $\text{jx(ip\_CH300H)}$            | Taraborrelli (2016)                                                                                 |
| J44033  | TrGJCN   | $\text{LBUT1ENNO}_3 + h\nu \rightarrow \text{C}_2\text{H}_5\text{CHO} + \text{HCHO} + \text{HO}_2 + \text{NO}_2$                           | $\text{J\_IC3H7N03}$               | Taraborrelli (2016)                                                                                 |
| J44034  | TrGJC    | $\text{BUT2OLOOH} + h\nu \rightarrow 2 \text{CH}_3\text{CHO} + \text{HO}_2 + \text{OH}$                                                    | $\text{jx(ip\_CH300H)}$            | Taraborrelli (2016)                                                                                 |
| J44035  | TrGJCN   | $\text{BUT2OLNO}_3 + h\nu \rightarrow 2 \text{CH}_3\text{CHO} + \text{HO}_2 + \text{NO}_2$                                                 | $\text{J\_IC3H7N03}$               | Taraborrelli (2016)                                                                                 |
| J44036  | TrGJC    | $\text{BUT2OLO} + h\nu \rightarrow \text{CH}_3\text{C(O)} + \text{HOCH}_2\text{CO}$                                                        | $\text{J\_ACETOL}$                 | Taraborrelli (2016)                                                                                 |
| J44037a | TrGJC    | $\text{C}_3\text{H}_7\text{CHO} + h\nu \rightarrow \text{C}_3\text{H}_7\text{O}_2 + \text{CO} + \text{HO}_2$                               | $\text{jx(ip\_C3H7CHO2HCO)}$       | Taraborrelli (2016)                                                                                 |
| J44037b | TrGJC    | $\text{C}_3\text{H}_7\text{CHO} + h\nu \rightarrow \text{C}_2\text{H}_4 + \text{CH}_2\text{CHOH}$                                          | $\text{jx(ip\_C3H7CHO2VINY)}$      | Taraborrelli (2016)*                                                                                |
| J44038  | TrGJC    | $\text{IPRCHO} + h\nu \rightarrow \text{iC}_3\text{H}_7\text{O}_2 + \text{CO} + \text{HO}_2$                                               | $\text{jx(ip\_IPRCHO2HCO)}$        | Taraborrelli (2016)                                                                                 |
| J44039  | TrGJCN   | $\text{IC4H9NO}_3 + h\nu \rightarrow \text{IPRCHO} + \text{NO}_2$                                                                          | $\text{J\_IC3H7N03}$               | Taraborrelli (2016)                                                                                 |
| J44040  | TrGJC    | $\text{IC}_4\text{H}_9\text{OOH} + h\nu \rightarrow \text{IPRCHO} + \text{HO}_2 + \text{OH}$                                               | $\text{jx(ip\_CH300H)}$            | Taraborrelli (2016)                                                                                 |
| J44041  | TrGJC    | $\text{PERIBUACID} + h\nu \rightarrow \text{iC}_3\text{H}_7\text{O}_2 + \text{CO}_2 + \text{OH}$                                           | $\text{jx(ip\_CH300H)}$            | Taraborrelli (2016)                                                                                 |
| J44042  | TrGJCN   | $\text{PIP}_N + h\nu \rightarrow .7 \text{IPRCHO} + .7 \text{NO}_2 + .3 \text{iC}_3\text{H}_7\text{O}_2 + .3 \text{CO}_2 + .3 \text{NO}_3$ | $\text{jx(ip\_PAN)}$               | Taraborrelli (2016),<br>Sander et al. (2014),<br>Sander et al. (2011)                               |
| J44043  | TrGJC    | $\text{HVMK} + h\nu \rightarrow \text{MGLYOX} + \text{CO} + 2 \text{OH}$                                                                   | $\text{jx(ip\_PeDIONE24)}$         | Taraborrelli (2016),<br>Nakanishi et al. (1977),<br>Messaadia et al. (2015),<br>Yoon et al. (1999)* |
| J44044  | TrGJC    | $\text{HMAC} + h\nu \rightarrow \text{HCOCC}_3\text{CO} + 2 \text{OH}$                                                                     | $\text{jx(ip\_PeDIONE24)}$         | Taraborrelli (2016),<br>Nakanishi et al. (1977),<br>Messaadia et al. (2015),<br>Yoon et al. (1999)* |
| J44045a | TrGJC    | $\text{CO}_2\text{C}_3\text{CHO} + h\nu \rightarrow \text{CH}_3\text{COCH}_2\text{O}_2 + \text{HO}_2 + \text{CO}$                          | $\text{jx(ip\_C2H5CHO2HCO)}$       | Rickard and Pascoe (2009)                                                                           |
| J44045b | TrGJC    | $\text{CO}_2\text{C}_3\text{CHO} + h\nu \rightarrow \text{HVMK}$                                                                           | $\text{jx(ip\_C2H5CHO2ENOL)}$      | Andrews et al. (2012),<br>Taraborrelli (2016)                                                       |
| J44046a | TrGJC    | $\text{IBUTDIAL} + h\nu \rightarrow \text{CH}_3\text{CHO} + \text{CO} + \text{HO}_2 + \text{CO}_2 + \text{H}_2\text{O}$                    | $\text{jx(ip\_C2H5CHO2HCO)} * 2.$  | see note*                                                                                           |
| J44046b | TrGJC    | $\text{IBUTDIAL} + h\nu \rightarrow \text{HMAC}$                                                                                           | $\text{jx(ip\_C2H5CHO2ENOL)} * 2.$ | Andrews et al. (2012),<br>Taraborrelli (2016)                                                       |
| J44200  | TrGJTerC | $\text{IBUTALOH} + h\nu \rightarrow \text{CH}_3\text{COCH}_3 + \text{HO}_2 + \text{HO}_2 + \text{CO}$                                      | $\text{J\_ACETOL}$                 | Rickard and Pascoe (2009)                                                                           |
| J44201  | TrGJTerC | $\text{IPRHOCO}_3\text{H} + h\nu \rightarrow \text{CH}_3\text{COCH}_3 + \text{HO}_2 + \text{CO}_2 + \text{OH}$                             | $\text{jx(ip\_CH300H)}$            | Rickard and Pascoe (2009)                                                                           |
| J44400a | TrGJAroC | $\text{MALDIALOOH} + h\nu \rightarrow \text{C}_3\text{OH}_2\text{CO} + \text{CO} + \text{OH} + \text{HO}_2$                                | $\text{jx(ip\_HOCH2CHO)} * 2$      | Rickard and Pascoe (2009)                                                                           |
| J44400b | TrGJAroC | $\text{MALDIALOOH} + h\nu \rightarrow \text{GLYOX} + \text{GLYOX} + \text{HO}_2 + \text{OH}$                                               | $\text{jx(ip\_CH300H)}$            | Rickard and Pascoe (2009)*                                                                          |

Table 2: Photolysis reactions (... continued)

| #       | labels    | reaction                                                                                            | rate coefficient                                                                           | reference                                          |
|---------|-----------|-----------------------------------------------------------------------------------------------------|--------------------------------------------------------------------------------------------|----------------------------------------------------|
| J44401  | TrGJAroC  | BZFUOOH + $h\nu$ → CO14O3CHO + HO <sub>2</sub> + OH                                                 | jx(ip_CH300H)                                                                              | Rickard and Pascoe (2009)*                         |
| J44402  | TrGJAroC  | HOCOC4DIAL + $h\nu$ → HCOCOHCO3 + HO <sub>2</sub> + CO                                              | jx(ip_MGLYOX)+jx(ip_HOCH2CHO)                                                              | Rickard and Pascoe (2009)                          |
| J44403  | TrGJAroCN | NBZFUOOH + $h\nu$ → .5 CO14O3CHO + .5 NO <sub>2</sub> + .5 NBZFUONE + .5 HO <sub>2</sub> + OH       | jx(ip_CH300H)                                                                              | Rickard and Pascoe (2009)*                         |
| J44404a | TrGJAroC  | MALDALCO3H + $h\nu$ → HCOCO <sub>3</sub> H + HO <sub>2</sub> + CO + HO <sub>2</sub> + CO            | jx(ip_MACR)                                                                                | Rickard and Pascoe (2009)                          |
| J44404b | TrGJAroC  | MALDALCO3H + $h\nu$ → .6 MALANHY + HO <sub>2</sub> + .4 GLYOX + .4 CO + .4 CO <sub>2</sub> + OH     | jx(ip_CH300H)                                                                              | Rickard and Pascoe (2009)*                         |
| J44405  | TrGJAroC  | EPXDLCO2H + $h\nu$ → C3DIALO2 + CO <sub>2</sub> + HO <sub>2</sub>                                   | 2.77*jx(ip_HOCH2CHO)                                                                       | Rickard and Pascoe (2009)                          |
| J44406  | TrGJAroC  | MALDIAL + $h\nu$ → .4 BZFUONE + .6 MALDIALCO3 + .6 HO <sub>2</sub>                                  | jx(ip_NO2)*0.14                                                                            | Rickard and Pascoe (2009)                          |
| J44407  | TrGJAroC  | MALANHYOOH + $h\nu$ → HCOCOHCO3 + CO <sub>2</sub> + OH                                              | jx(ip_CH300H)                                                                              | Rickard and Pascoe (2009)*                         |
| J44408  | TrGJAroC  | EPXDLCO3H + $h\nu$ → C3DIALO2 + OH + CO <sub>2</sub>                                                | jx(ip_CH300H)+2.77*jx(ip_HOCH2CHO)                                                         | Rickard and Pascoe (2009)                          |
| J44409  | TrGJAroC  | CO2C4DIAL + $h\nu$ → CO + CO + HO <sub>2</sub> + HO <sub>2</sub> + CO + CO                          | jx(ip_MGLYOX)*2                                                                            | Rickard and Pascoe (2009)                          |
| J44410  | TrGJAroC  | MALDALCO2H + $h\nu$ → HCOCO <sub>2</sub> H + HO <sub>2</sub> + CO + HO <sub>2</sub> + CO            | jx(ip_MACR)                                                                                | Rickard and Pascoe (2009)                          |
| J44411  | TrGJAroC  | EPXC4DIAL + $h\nu$ → C3DIALO2 + CO + HO <sub>2</sub>                                                | 2.77*jx(ip_HOCH2CHO)*2                                                                     | Rickard and Pascoe (2009)                          |
| J44412  | TrGJAroC  | CO14O3CHO + $h\nu$ → HO <sub>2</sub> + CO + HCOCH2O2 + CO <sub>2</sub>                              | jx(ip_MGLYOX)                                                                              | Rickard and Pascoe (2009)                          |
| J44414  | TrGJAroC  | MECOACEOOH + $h\nu$ → CH <sub>3</sub> C(O) + HCHO + CO <sub>2</sub> + OH                            | jx(ip_CH300H)                                                                              | Rickard and Pascoe (2009)*                         |
| J45002  | TrGJC     | LISOPACOOH + $h\nu$ → LISOPACO + OH                                                                 | jx(ip_CH300H)                                                                              | Rickard and Pascoe (2009)                          |
| J45003  | TrGJCN    | LISOPACNO3 + $h\nu$ → LISOPACO + NO <sub>2</sub>                                                    | 0.59*J_IC3H7N03                                                                            | see note*                                          |
| J45004  | TrGJC     | ISOPBOOH + $h\nu$ → MVK + HCHO + HO <sub>2</sub> + OH                                               | jx(ip_CH300H)                                                                              | Rickard and Pascoe (2009)                          |
| J45005  | TrGJCN    | ISOPBNO3 + $h\nu$ → MVK + HCHO + HO <sub>2</sub> + NO <sub>2</sub>                                  | 2.84*J_IC3H7N03                                                                            | see note*                                          |
| J45006  | TrGJC     | ISOPDOOH + $h\nu$ → MACR + HCHO + HO <sub>2</sub> + OH                                              | jx(ip_CH300H)                                                                              | Rickard and Pascoe (2009)                          |
| J45007  | TrGJCN    | ISOPDNO3 + $h\nu$ → MACR + HCHO + HO <sub>2</sub> + NO <sub>2</sub>                                 | J_IC3H7N03                                                                                 | see note*                                          |
| J45008  | TrGJCN    | NISOPOOH + $h\nu$ → NC4CHO + HO <sub>2</sub> + OH                                                   | jx(ip_CH300H)                                                                              | Rickard and Pascoe (2009)                          |
| J45009  | TrGJCN    | NC4CHO + $h\nu$ → LHC4ACCO3 + NO <sub>2</sub>                                                       | (.59*J_IC3H7N03+jx(ip_MACR))<br>*(jx(ip_MEKN03)+1E-10)/(J_IC3H7N03+0.42*jx(ip_CHOH)+1E-10) | Müller et al. (2014),<br>Taraborrelli (2016)*      |
| J45010  | TrGJCN    | LNISOOH + $h\nu$ → NOA + OH + .5 HOCHCHO + .5 CO + .5 HO <sub>2</sub> + .5 CO <sub>2</sub>          | jx(ip_CH300H)                                                                              | Taraborrelli et al. (2009),<br>Taraborrelli (2016) |
| J45011  | TrGJC     | LHC4ACCHO + $h\nu$ → .5 LHC4ACCO3 + .5 HO <sub>2</sub> + .5 CO + .5 OH + .25 MACRO2 + .25 LHMVKABO2 | jx(ip_MACR)                                                                                | Taraborrelli (2016)                                |

Table 2: Photolysis reactions (... continued)

| #       | labels    | reaction                                                                                                                                       | rate coefficient                    | reference                                                              |
|---------|-----------|------------------------------------------------------------------------------------------------------------------------------------------------|-------------------------------------|------------------------------------------------------------------------|
| J45012  | TrGJC     | LC578OOH + $h\nu$ → .25 CH <sub>3</sub> COCH <sub>2</sub> OH + .75 MGLYOX + .25 HOCHCHO + .75 HOCH <sub>2</sub> CHO + .75 HO <sub>2</sub> + OH | jx(ip_CH300H)+ 2.77*jx(ip_HOCH2CHO) | Taraborrelli (2016)                                                    |
| J45013  | TrGJC     | LHC4ACCO3H + $h\nu$ → OH + .5 MACRO2 + .5 LHMVKABO2 + OH + CO <sub>2</sub>                                                                     | J_HPALD                             | Taraborrelli (2016)                                                    |
| J45014  | TrGJCN    | LC5PAN1719 + $h\nu$ → .7 LHC4ACCO3 + .7 NO <sub>2</sub> + .15 MACRO2 + .15 LHMVKABO2 + .3 CO <sub>2</sub> + .3 NO <sub>3</sub>                 | jx(ip_PAN)                          | Taraborrelli (2016)                                                    |
| J45015  | TrGJC     | HCOC5 + $h\nu$ → .65 CH <sub>3</sub> + .65 CO + .65 HCHO + .35 OH + .35 CH <sub>3</sub> COCH <sub>2</sub> O <sub>2</sub> + HOCH2CO             | 0.5*jx(ip_MVK)                      | Taraborrelli (2016)*                                                   |
| J45016  | TrGJC     | C59OOH + $h\nu$ → CH <sub>3</sub> COCH <sub>2</sub> OH + HOCH2CO + OH                                                                          | J_ACETOL+jx(ip_CH300H)              | Taraborrelli (2016)                                                    |
| J45017  | TrGJTerC  | C511OOH + $h\nu$ → CH <sub>3</sub> C(O) + HCOCH2CHO + OH                                                                                       | jx(ip_CH300H)+jx(ip_HOCH2CHO)       | Rickard and Pascoe (2009)                                              |
| J45018a | TrGJTerC  | CO23C4CHO + $h\nu$ → CH <sub>3</sub> COCOCH <sub>2</sub> O <sub>2</sub> + HO <sub>2</sub> + CO                                                 | jx(ip_HOCH2CHO)                     | Rickard and Pascoe (2009)                                              |
| J45018b | TrGJTerC  | CO23C4CHO + $h\nu$ → CH <sub>3</sub> C(O) + HCOCH2CO3                                                                                          | 2.15*jx(ip_MGLYOX)                  | Rickard and Pascoe (2009)                                              |
| J45019  | TrGJTerC  | CO23C4CO3H + $h\nu$ → CH <sub>3</sub> COCOCH <sub>2</sub> O <sub>2</sub> + CO <sub>2</sub> + OH                                                | jx(ip_CH300H)+jx(ip_HOCH2CHO)       | Rickard and Pascoe (2009)                                              |
| J45020  | TrGJTerC  | C512OOH + $h\nu$ → C513O2 + OH                                                                                                                 | jx(ip_CH300H)+jx(ip_HOCH2CHO)       | Rickard and Pascoe (2009)                                              |
| J45021  | TrGJTerC  | CO13C4CHO + $h\nu$ → CHOC3COO2 + CO + HO <sub>2</sub>                                                                                          | jx(ip_HOCH2CHO)*2.                  | Rickard and Pascoe (2009)                                              |
| J45022  | TrGJTerC  | C513OOH + $h\nu$ → GLYOX + HOC2H4CO3 + OH                                                                                                      | jx(ip_CH300H)+jx(ip_HOCH2CHO)       | Rickard and Pascoe (2009)                                              |
| J45023  | TrGJTerC  | C513CO + $h\nu$ → HOC2H4CO3 + HO <sub>2</sub> + CO + CO                                                                                        | jx(ip_MGLYOX)+2.15*jx(ip_MGLYOX)    | Rickard and Pascoe (2009)                                              |
| J45024  | TrGJTerC  | C514OOH + $h\nu$ → CO13C4CHO + HO <sub>2</sub> + OH                                                                                            | jx(ip_CH300H)+jx(ip_HOCH2CHO)*2.    | Rickard and Pascoe (2009)                                              |
| J45025  | TrGJTerCN | C514NO3 + $h\nu$ → CO13C4CHO + HO <sub>2</sub> + NO <sub>2</sub>                                                                               | J_IC3H7NO3+jx(ip_HOCH2CHO)*2.       | Rickard and Pascoe (2009)                                              |
| J45026a | TrGJC     | ZCODC23DBCOOH + $h\nu$ → OH + CO + HVMK + OH                                                                                                   | J_HPALD*0.6*0.5                     | Taraborrelli (2016),<br>Jenkin et al. (2015),<br>Peeters et al. (2014) |
| J45026b | TrGJC     | ZCODC23DBCOOH + $h\nu$ → OH + CO + CH <sub>3</sub> C(O) + HOCH <sub>2</sub> CHO                                                                | J_HPALD*0.6*0.5                     | Taraborrelli (2016),<br>Jenkin et al. (2015),<br>Peeters et al. (2014) |
| J45026c | TrGJC     | ZCODC23DBCOOH + $h\nu$ → OH + CO + HMAC + OH                                                                                                   | J_HPALD*0.4*0.5                     | Taraborrelli (2016),<br>Jenkin et al. (2015),<br>Peeters et al. (2014) |
| J45026d | TrGJC     | ZCODC23DBCOOH + $h\nu$ → OH + CO + CO + CH <sub>3</sub> COCH <sub>2</sub> OH + HO <sub>2</sub>                                                 | J_HPALD*0.4*0.5                     | Taraborrelli (2016),<br>Jenkin et al. (2015),<br>Peeters et al. (2014) |
| J45027  | TrGJC     | ZCO3HC23DBCOD + $h\nu$ → .62 EZCH3CO2CHCHO + .38 EZCHOCCH3CHO2 + OH + CO <sub>2</sub>                                                          | J_HPALD                             | Taraborrelli (2016)                                                    |
| J45028a | TrGJC     | C1OOHC2OOHC4OD + $h\nu$ → CH <sub>3</sub> COCH <sub>2</sub> O <sub>2</sub> H + OH + 2 CO + HO <sub>2</sub>                                     | 2.77*JX(IP_HOCH2CHO)                | Taraborrelli (2016)                                                    |

Table 2: Photolysis reactions (... continued)

| #       | labels    | reaction                                                                                              | rate coefficient                            | reference                                      |
|---------|-----------|-------------------------------------------------------------------------------------------------------|---------------------------------------------|------------------------------------------------|
| J45028b | TrGJC     | $C10OHC2OOHC4OD + h\nu \rightarrow .5 CH_3COCH_2O_2H + .5 HOCHCHO + .5 CO_2H_3CHO + .5 HCHO + 1.5 OH$ | $2.*JX(IP\_CH300H)$                         | Taraborrelli (2016)                            |
| J45029  | TrGC      | $DB1OOH + h\nu \rightarrow DB1O_2 + OH$                                                               | $JX(IP\_CH300H)$                            | Taraborrelli (2016)                            |
| J45030  | TrGC      | $DB2OOH + h\nu \rightarrow .48 CH_3COCH_2OH + .52 HOCH_2CHO + .52 MGLYOX + .48 GLYOX + HO_2 + OH$     | $JX(ip\_CH300H)$                            | Taraborrelli (2016)                            |
| J45031a | TrGJC     | $C1ODC2OOHC4OD + h\nu \rightarrow MGLYOX + HOCHCHO + OH$                                              | $JX(ip\_CH300H)$                            | Taraborrelli (2016)                            |
| J45031b | TrGJC     | $C1ODC2OOHC4OD + h\nu \rightarrow CO_2H_3CHO + CO + HO_2 + OH$                                        | $2.*2.77*JX(IP\_HOCH2CHO)$                  | Taraborrelli (2016)                            |
| J45032  | TrGJC     | $ZCODC23DBCOD + h\nu \rightarrow .5 CH_3COCHCO + .5 HCOCCH_3CO + CO + HO_2 + OH$                      | $jx(ip\_N02)*0.1*0.5$                       | Taraborrelli (2016)*                           |
| J45033  | TrGCN     | $DB1NO_3 + h\nu \rightarrow DB1O_2 + NO_2$                                                            | $J\_IC3H7N03$                               | Taraborrelli (2016)                            |
| J45034  | TrGJTerC  | $CHOC3COOOH + h\nu \rightarrow CHOC3COO_2 + CO_2 + OH$                                                | $jx(ip\_CH300H)+jx(ip\_HOCH2CHO)+J\_ACETOL$ | Rickard and Pascoe (2009)                      |
| J45200a | TrGJTerC  | $LMBOABOOH + h\nu \rightarrow HOCH_2CHO + CH_3COCH_3 + HO_2 + OH$                                     | $jx(ip\_CH300H)*.67$                        | Rickard and Pascoe (2009), Taraborrelli (2016) |
| J45200b | TrGJTerC  | $LMBOABOOH + h\nu \rightarrow IBUTALOH + HCHO + HO_2 + OH$                                            | $jx(ip\_CH300H)*.33$                        | Rickard and Pascoe (2009), Taraborrelli (2016) |
| J45201  | TrGJTerC  | $MBOACO + h\nu \rightarrow HCHO + HO_2 + IPRHOCO_3$                                                   | $J\_ACETOL$                                 | Rickard and Pascoe (2009)                      |
| J45202  | TrGJTerC  | $MBOCOCO + h\nu \rightarrow CO + HO_2 + IPRHOCO_3$                                                    | $jx(ip\_MGLYOX)$                            | Rickard and Pascoe (2009)                      |
| J45203a | TrGJTerCN | $LNMBOABOOH + h\nu \rightarrow NO_3CH_2CHO + CH_3COCH_3 + HO_2 + OH$                                  | $jx(ip\_CH300H)*.65$                        | Rickard and Pascoe (2009), Taraborrelli (2016) |
| J45203b | TrGJTerCN | $LNMBOABOOH + h\nu \rightarrow IBUTALOH + HCHO + NO_2 + OH$                                           | $jx(ip\_CH300H)*.35$                        | Rickard and Pascoe (2009), Taraborrelli (2016) |
| J45204  | TrGJTerCN | $NC4OHCO_3H + h\nu \rightarrow IBUTALOH + CO_2 + NO_2 + OH$                                           | $jx(ip\_CH300H)$                            | Rickard and Pascoe (2009)                      |
| J45400  | TrGJAroC  | $C54CO + h\nu \rightarrow HO_2 + CO + CO + CO + CH_3C(O)$                                             | $jx(ip\_MGLYOX)+2.15*jx(ip\_MGLYOX)*2$      | Rickard and Pascoe (2009)                      |
| J45401  | TrGJAroC  | $C5134CO_2OH + h\nu \rightarrow CH_3COCOCHO + HO_2 + CO + HO_2$                                       | $jx(ip\_HOCH2CHO)+2.15*jx(ip\_MGLYOX)$      | Rickard and Pascoe (2009)                      |
| J45402  | TrGJAroC  | $C5DIALOOH + h\nu \rightarrow MALDIAL + CO + HO_2 + OH$                                               | $jx(ip\_CH300H)+jx(ip\_MACR)$               | Rickard and Pascoe (2009)*                     |
| J45406  | TrGJAroC  | $C5CO14OH + h\nu \rightarrow CH_3C(O) + HCOCO_2H + HO_2 + CO$                                         | $jx(ip\_MVK)$                               | Rickard and Pascoe (2009)                      |

Table 2: Photolysis reactions (... continued)

| #      | labels    | reaction                                                                                               | rate coefficient                            | reference                  |
|--------|-----------|--------------------------------------------------------------------------------------------------------|---------------------------------------------|----------------------------|
| J45407 | TrGJAroC  | $C5DICARB + h\nu \rightarrow .6 C5CO14O2 + .6 HO_2 + .4 TLFUONE$                                       | $jx(ip\_NO2)*0.2$                           | Rickard and Pascoe (2009)* |
| J45408 | TrGJAroC  | $MC3ODBCO2H + h\nu \rightarrow CH_3COCO_2H + HO_2 + CO + HO_2 + CO$                                    | $jx(ip\_MACR)$                              | Rickard and Pascoe (2009)  |
| J45409 | TrGJAroC  | $ACCOMMECHO + h\nu \rightarrow MECOACETO2 + HO_2 + CO$                                                 | $jx(ip\_HOCH2CHO)$                          | Rickard and Pascoe (2009)  |
| J45410 | TrGJAroC  | $MMALNHOOH + h\nu \rightarrow CO2H3CO3 + CO_2 + OH$                                                    | $jx(ip\_CH300H)$                            | Rickard and Pascoe (2009)* |
| J45411 | TrGJAroC  | $C5DICAROOH + h\nu \rightarrow MGLYOX + GLYOX + HO_2 + OH$                                             | $jx(ip\_CH300H)+jx(ip\_HOCH2CHO)+J\_ACETOL$ | Rickard and Pascoe (2009)* |
| J45412 | TrGJAroCN | $NTLFUOOH + h\nu \rightarrow ACCOMECHO + NO_2 + OH$                                                    | $jx(ip\_CH300H)$                            | Rickard and Pascoe (2009)* |
| J45414 | TrGJAroC  | $C5CO14OOH + h\nu \rightarrow .83 MALANHY + .83 CH_3 + .17 MGLYOX + .17 HO_2 + .17 CO + .17 CO_2 + OH$ | $jx(ip\_CH300H)$                            | Rickard and Pascoe (2009)* |
| J45415 | TrGJAroC  | $TLFUOOH + h\nu \rightarrow ACCOMECHO + HO_2 + OH$                                                     | $jx(ip\_CH300H)$                            | Rickard and Pascoe (2009)* |
| J45417 | TrGJAroC  | $ACCOMECO3H + h\nu \rightarrow MECOACETO2 + CO_2 + OH$                                                 | $jx(ip\_CH300H)$                            | Rickard and Pascoe (2009)  |
| J45418 | TrGJAroC  | $C5DIALCO + h\nu \rightarrow MALDIALCO3 + CO + HO_2$                                                   | $jx(ip\_MGLYOX)+jx(ip\_MACR)$               | Rickard and Pascoe (2009)  |
| J46200 | TrGJTerCN | $C614NO3 + h\nu \rightarrow CO23C4CHO + HCHO + HO_2 + NO_2$                                            | $2.15*jx(ip\_MGLYOX)$                       | Rickard and Pascoe (2009)  |
| J46201 | TrGJTerC  | $C614OOH + h\nu \rightarrow CO23C4CHO + HCHO + HO_2 + OH$                                              | $jx(ip\_CH300H)+2.15*jx(ip\_MGLYOX)$        | Rickard and Pascoe (2009)  |
| J46202 | TrGJTerC  | $CO235C5CHO + h\nu \rightarrow CO23C4CO3 + CO + HO_2$                                                  | $jx(ip\_MGLYOX)$                            | Rickard and Pascoe (2009)  |
| J46203 | TrGJTerC  | $CO235C6OOH + h\nu \rightarrow CO23C4CO3 + HCHO + OH$                                                  | $jx(ip\_CH300H)+2.15*jx(ip\_MGLYOX)$        | Rickard and Pascoe (2009)  |
| J46400 | TrGJAroC  | $PHENOOH + h\nu \rightarrow .71 MALDALCO2H + .71 GLYOX + .29 PBZQONE + HO_2 + OH$                      | $jx(ip\_CH300H)$                            | Rickard and Pascoe (2009)* |
| J46401 | TrGJAroC  | $C6CO4DB + h\nu \rightarrow C4CO2DBC03 + HO_2 + CO$                                                    | $jx(ip\_MGLYOX)*2$                          | Rickard and Pascoe (2009)  |
| J46402 | TrGJAroC  | $C5CO2DCO3H + h\nu \rightarrow CH_3C(O) + HCOCOCHO + CO_2 + OH$                                        | $jx(ip\_CH300H)+jx(ip\_MGLYOX)$             | Rickard and Pascoe (2009)  |
| J46403 | TrGJAroCN | $NDNPHEOOH + h\nu \rightarrow NC4DCO2H + HNO_3 + CO + CO + NO_2 + OH$                                  | $jx(ip\_CH300H)$                            | Rickard and Pascoe (2009)* |
| J46404 | TrGJAroCN | $BZBIPERNO3 + h\nu \rightarrow GLYOX + HO_2 + .5 BZFUONE + .5 BZFUONE + NO_2$                          | $J\_IC3H7N03$                               | Rickard and Pascoe (2009)* |
| J46405 | TrGJAroCN | $HOC6H4NO2 + h\nu \rightarrow HONO + CPDKETENE$                                                        | $jx(ip\_HOC6H4NO2)$                         | Chen et al. (2011)*        |
| J46406 | TrGJAroC  | $CPDKETENE + h\nu \rightarrow CO_2 + CO + 2 HO_2 + MALDIAL$                                            | $J\_KETENE$                                 | see note*                  |
| J46407 | TrGJAroC  | $C5COOHCO3H + h\nu \rightarrow HOCOC4DIAL + HO_2 + CO + CO_2 + OH$                                     | $jx(ip\_CH300H)$                            | Rickard and Pascoe (2009)  |
| J46408 | TrGJAroC  | $BZEPOXMUC + h\nu \rightarrow .5 C5DIALO2 + 1.5 HO_2 + 1.5 CO + .5 MALDIAL$                            | $4.E3*jx(ip\_MVK)*0.1$                      | Rickard and Pascoe (2009)  |

Table 2: Photolysis reactions (... continued)

| #      | labels    | reaction                                                                                            | rate coefficient                 | reference                  |
|--------|-----------|-----------------------------------------------------------------------------------------------------|----------------------------------|----------------------------|
| J46409 | TrGJAroCN | NPHEN1OOH + $h\nu$ → NPHEN1O + OH                                                                   | jx(ip_CH300H)                    | Rickard and Pascoe (2009)  |
| J46410 | TrGJAroC  | BZEMUCCO + $h\nu$ → HCOCOHCO3 + C3DIALO2                                                            | jx(ip_HOCH2CHO)*2+J_ACETOL       | Rickard and Pascoe (2009)  |
| J46411 | TrGJAroC  | BZEMUCCO2H + $h\nu$ → C5DIALO2 + CO <sub>2</sub> + HO <sub>2</sub>                                  | jx(ip_MACR)                      | Rickard and Pascoe (2009)  |
| J46412 | TrGJAroCN | NNCATECOOH + $h\nu$ → NC4DCO2H + HCOCO <sub>2</sub> H + NO <sub>2</sub> + OH                        | jx(ip_CH300H)                    | Rickard and Pascoe (2009)* |
| J46413 | TrGJAroC  | C615CO2OOH + $h\nu$ → C5DICARB + CO + HO <sub>2</sub> + OH                                          | jx(ip_MVK)+jx(ip_CH300H)         | Rickard and Pascoe (2009)  |
| J46414 | TrGJAroCN | NPHENOOH + $h\nu$ → MALDALCO2H + GLYOX + OH + NO <sub>2</sub>                                       | J_IC3H7N03 + jx(ip_CH300H)       | Rickard and Pascoe (2009)  |
| J46415 | TrGJAroCN | NCATECOOH + $h\nu$ → NC4DCO2H + HCOCO <sub>2</sub> H + HO <sub>2</sub> + OH                         | jx(ip_CH300H)                    | Rickard and Pascoe (2009)* |
| J46416 | TrGJAroC  | PBZQOOH + $h\nu$ → C5CO2OHCO3 + OH                                                                  | jx(ip_CH300H)                    | Rickard and Pascoe (2009)* |
| J46417 | TrGJAroC  | BZOBIPEROH + $h\nu$ → MALDIALCO3 + GLYOX + HO <sub>2</sub>                                          | J_ACETOL                         | Rickard and Pascoe (2009)  |
| J46418 | TrGJAroC  | BZBIPEROOH + $h\nu$ → GLYOX + HO <sub>2</sub> + .5 BZFUONE + .5 BZFUONE + OH                        | jx(ip_CH300H)                    | Rickard and Pascoe (2009)* |
| J46419 | TrGJAroCN | NBZQOOH + $h\nu$ → C6CO4DB + NO <sub>2</sub> + OH                                                   | jx(ip_CH300H)                    | Rickard and Pascoe (2009)* |
| J46420 | TrGJAroC  | CATEC1OOH + $h\nu$ → CATEC1O + OH                                                                   | jx(ip_CH300H)                    | Rickard and Pascoe (2009)  |
| J46421 | TrGJAroC  | C6125CO + $h\nu$ → C5CO14O2 + CO + HO <sub>2</sub>                                                  | jx(ip_MGLYOX)+jx(ip_MVK)         | Rickard and Pascoe (2009)  |
| J46422 | TrGJAroCN | DNPHEOOH + $h\nu$ → NC4DCO2H + HCOCO <sub>2</sub> H + NO <sub>2</sub> + OH                          | jx(ip_CH300H)                    | Rickard and Pascoe (2009)* |
| J46423 | TrGJAroC  | BZEMUCCO3H + $h\nu$ → C5DIALO2 + CO <sub>2</sub> + OH                                               | jx(ip_CH300H)+jx(ip_MACR)        | Rickard and Pascoe (2009)  |
| J46424 | TrGJAroC  | C6H5OOH + $h\nu$ → C6H5O + OH                                                                       | jx(ip_CH300H)                    | Rickard and Pascoe (2009)  |
| J46425 | TrGJAroC  | BZEMUCOOH + $h\nu$ → .5 EPXC4DIAL + .5 GLYOX + .5 HO <sub>2</sub> + .5 C3DIALO2 + .5 C32OH13CO + OH | jx(ip_CH300H)+jx(ip_HOCH2CHO)*2  | Rickard and Pascoe (2009)* |
| J46427 | TrGJAroCN | BZEMUCNO3 + $h\nu$ → EPXC4DIAL + NO <sub>2</sub> + GLYOX + HO <sub>2</sub>                          | 2.77*jx(ip_HOCH2CHO)             | Rickard and Pascoe (2009)  |
| J46428 | TrGJAroCN | DNPHEN + $h\nu$ → HONO + NCPDKETENE                                                                 | jx(ip_HOC6H4N02)                 | Taraborrelli (2016)        |
| J46429 | TrGJAroCN | NCPDKETENE + $h\nu$ → CO <sub>2</sub> + CO + 2 HO <sub>2</sub> + NC4DCO2H                           | J_KETENE                         | see note*                  |
| J47200 | TrGJTerC  | CO235C6CHO + $h\nu$ → CHOC3COCO3 + CH <sub>3</sub> C(O)                                             | 2.15*jx(ip_MGLYOX)               | Rickard and Pascoe (2009)  |
| J47201 | TrGJTerC  | C235C6CO3H + $h\nu$ → CO235C6O2 + CO <sub>2</sub> + OH                                              | jx(ip_CH300H)+2.15*jx(ip_MGLYOX) | Rickard and Pascoe (2009)  |
| J47202 | TrGJTerC  | C716OOH + $h\nu$ → CO13C4CHO + CH <sub>3</sub> C(O) + OH                                            | jx(ip_CH300H)+jx(ip_HOCH2CHO)    | Rickard and Pascoe (2009)  |
| J47203 | TrGJTerC  | C721OOH + $h\nu$ → C722O2 + OH                                                                      | jx(ip_CH300H)                    | Rickard and Pascoe (2009)  |
| J47204 | TrGJTerC  | C722OOH + $h\nu$ → CH <sub>3</sub> COCH <sub>3</sub> + C44O2 + OH                                   | jx(ip_CH300H)                    | Rickard and Pascoe (2009)  |
| J47400 | TrGJAroC  | TLEPOXMUC + $h\nu$ → .5 C615CO2O2 + HO <sub>2</sub> + CO + .5 EPXC4DIAL + .5 CH <sub>3</sub> C(O)   | 4.E3*jx(ip_MVK)*0.1              | Rickard and Pascoe (2009)  |

Table 2: Photolysis reactions (... continued)

| #       | labels    | reaction                                                                                                                                           | rate coefficient                                  | reference                      |
|---------|-----------|----------------------------------------------------------------------------------------------------------------------------------------------------|---------------------------------------------------|--------------------------------|
| J47401  | TrGJAroC  | $C_6H_5CH_2OOH + h\nu \rightarrow BENZAL + HO_2 + OH$                                                                                              | $jx(ip\_CH300H)$                                  | Rickard and Pascoe (2009)*     |
| J47402  | TrGJAroCN | $C_6H_5CH_2NO_3 + h\nu \rightarrow BENZAL + HO_2 + NO_2$                                                                                           | $0.59*J\_IC3H7N03$                                | Rickard and Pascoe (2009)*     |
| J47403  | TrGJAroC  | $BENZAL + h\nu \rightarrow HO_2 + CO + C_6H_5O_2$                                                                                                  | $jx(ip\_BENZAL)$                                  | T. J. Wallington et al. (2014) |
| J47404  | TrGJAroC  | $TLBIPEROOH + h\nu \rightarrow .6\ GLYOX + .4\ MGLYOX + HO_2 + .2\ ZCODC23DBCOD + .2\ C_5DICARB + .2\ TLFUONE + .2\ BZFUONE + .2\ MALDIAL + OH$    | $jx(ip\_CH300H)$                                  | Rickard and Pascoe (2009)*     |
| J47405  | TrGJAroCN | $TLBIPERNO_3 + h\nu \rightarrow .6\ GLYOX + .4\ MGLYOX + HO_2 + .2\ ZCODC23DBCOD + .2\ C_5DICARB + .2\ TLFUONE + .2\ BZFUONE + .2\ MALDIAL + NO_2$ | $J\_IC3H7N03$                                     | Rickard and Pascoe (2009)*     |
| J47406  | TrGJAroC  | $TLOBIPEROH + h\nu \rightarrow C_5CO_{14}O_2 + GLYOX + HO_2$                                                                                       | $J\_ACETOL$                                       | Rickard and Pascoe (2009)      |
| J47407  | TrGJAroC  | $CRESOOH + h\nu \rightarrow .68\ C_5CO_{14}OH + .68\ GLYOX + HO_2 + .32\ PTLQONE + OH$                                                             | $jx(ip\_CH300H)$                                  | Rickard and Pascoe (2009)*     |
| J47408a | TrGJAroCN | $NCRESOOH + h\nu \rightarrow .68\ C_5CO_{14}OH + .68\ GLYOX + HO_2 + .32\ PTLQONE + OH + NO_2$                                                     | $J\_IC3H7N03$                                     | Rickard and Pascoe (2009)*     |
| J47408b | TrGJAroCN | $NCRESOOH + h\nu \rightarrow C_5CO_{14}OH + GLYOX + NO_2 + OH$                                                                                     | $jx(ip\_CH300H)$                                  | Rickard and Pascoe (2009)*     |
| J47409  | TrGJAroCN | $TOL1OHNO_2 + h\nu \rightarrow HONO + MCPDKETENE$                                                                                                  | $jx(ip\_HOPh3Me2N02)$                             | see note*                      |
| J47410  | TrGJAroC  | $TLEMUCCO_2H + h\nu \rightarrow C_6_{15}CO_2O_2 + CO_2 + HO_2$                                                                                     | $jx(ip\_MACR)$                                    | Rickard and Pascoe (2009)      |
| J47411  | TrGJAroC  | $TLEMUCCO_3H + h\nu \rightarrow C_6_{15}CO_2O_2 + CO_2 + OH$                                                                                       | $jx(ip\_CH300H)+jx(ip\_MACR)$                     | Rickard and Pascoe (2009)      |
| J47412  | TrGJAroC  | $TLEMUCOOH + h\nu \rightarrow .5\ C_3DIALO_2 + .5\ CO_2H_3CHO + .5\ EPXC4DIAL + .5\ MGLYOX + .5\ HO_2 + OH$                                        | $jx(ip\_CH300H)+2.77*jx(ip\_HOCH_2CHO)+J\_ACETOL$ | Rickard and Pascoe (2009)*     |
| J47413  | TrGJAroCN | $TLEMUCNO_3 + h\nu \rightarrow EPXC4DIAL + NO_2 + CH_3C(O) + CO + HO_2$                                                                            | $2.77*jx(ip\_HOCH_2CHO)+J\_ACETOL$                | Rickard and Pascoe (2009)      |
| J47414  | TrGJAroC  | $TLEMUCCO + h\nu \rightarrow CH_3C(O) + EPXC4DIAL + CO + HO_2$                                                                                     | $2.77*jx(ip\_HOCH_2CHO)+2.15*jx(ip\_MGLYOX)$      | Rickard and Pascoe (2009)      |
| J47415  | TrGJAroC  | $C_6H_5CO_3H + h\nu \rightarrow C_6H_5O_2 + CO_2 + OH$                                                                                             | $jx(ip\_CH300H)$                                  | Rickard and Pascoe (2009)      |
| J47416  | TrGJAroC  | $OXYL1OOH + h\nu \rightarrow TOL1O + OH$                                                                                                           | $jx(ip\_CH300H)$                                  | Rickard and Pascoe (2009)      |
| J47417  | TrGJAroCN | $MNCATECH + h\nu \rightarrow HONO + MCPDKETENE$                                                                                                    | $jx(ip\_HOPh3Me2N02)$                             | see note*                      |
| J47418  | TrGJAroC  | $MCPDKETENE + h\nu \rightarrow CO_2 + CO + 2\ HO_2 + ZCODC23DBCOD$                                                                                 | $J\_KETENE$                                       | see note*                      |
| J47419  | TrGJAroCN | $DNCRES + h\nu \rightarrow HONO + MNCPCDKETENE$                                                                                                    | $jx(ip\_HOPh3Me2N02)$                             | see note*                      |



Table 2: Photolysis reactions (... continued)

| #      | labels    | reaction                                                                             | rate coefficient                | reference                  |
|--------|-----------|--------------------------------------------------------------------------------------|---------------------------------|----------------------------|
| J47420 | TrGJAroCN | MNCPDKETENE + $h\nu$ → CO <sub>2</sub> + CO + 2 HO <sub>2</sub> + NC4MDCO2HN         | J_KETENE                        | see note*                  |
| J47421 | TrGJAroC  | MCATEC1OOH + $h\nu$ → MCATEC1O + OH                                                  | jx(ip_CH300H)                   | Rickard and Pascoe (2009)  |
| J47422 | TrGJAroCN | NPTLQOOH + $h\nu$ → C7CO4DB + NO <sub>2</sub> + OH                                   | jx(ip_CH300H)                   | Rickard and Pascoe (2009)* |
| J47423 | TrGJAroC  | PTLQOOH + $h\nu$ → C6CO2OHCO3 + OH                                                   | jx(ip_CH300H)                   | Rickard and Pascoe (2009)* |
| J47424 | TrGJAroCN | NCRES1OOH + $h\nu$ → NCRES1O + OH                                                    | jx(ip_CH300H)                   | Rickard and Pascoe (2009)  |
| J47425 | TrGJAroCN | MNNCATCOOH + $h\nu$ → NC4MDCO2HN + HCOCO <sub>2</sub> H + NO <sub>2</sub> + OH       | jx(ip_CH300H)                   | Rickard and Pascoe (2009)* |
| J47426 | TrGJAroCN | MNCATECOOH + $h\nu$ → NC4MDCO2HN + HCOCO <sub>2</sub> H + HO <sub>2</sub> + OH       | jx(ip_CH300H)                   | Rickard and Pascoe (2009)* |
| J47427 | TrGJAroC  | C7CO4DB + $h\nu$ → C5CO2DBCO3 + HO <sub>2</sub> + CO                                 | jx(ip_MGLYOX)*2                 | Rickard and Pascoe (2009)  |
| J47428 | TrGJAroCN | NDNCRESOOH + $h\nu$ → NC4MDCO2HN + HNO <sub>3</sub> + CO + CO + NO <sub>2</sub> + OH | jx(ip_CH300H)                   | Rickard and Pascoe (2009)* |
| J47429 | TrGJAroCN | DNCRESOOH + $h\nu$ → NC4MDCO2HN + HCOCO <sub>2</sub> H + NO <sub>2</sub> + OH        | jx(ip_CH300H)                   | Rickard and Pascoe (2009)* |
| J47430 | TrGJAroC  | C6COOHCO3H + $h\nu$ → C5134CO2OH + HO <sub>2</sub> + CO + CO <sub>2</sub> + OH       | jx(ip_CH300H)                   | Rickard and Pascoe (2009)  |
| J48200 | TrGJTerC  | C86OOH + $h\nu$ → C511O2 + CH <sub>3</sub> COCH <sub>3</sub> + OH                    | jx(ip_CH300H)+ jx(ip_HOCH2CHO)  | Rickard and Pascoe (2009)  |
| J48201 | TrGJTerC  | C812OOH + $h\nu$ → C813O2 + OH                                                       | jx(ip_CH300H)                   | Rickard and Pascoe (2009)  |
| J48202 | TrGJTerC  | C813OOH + $h\nu$ → CH <sub>3</sub> COCH <sub>3</sub> + C512O2 + OH                   | jx(ip_CH300H)+jx(ip_MGLYOX)     | Rickard and Pascoe (2009)  |
| J48203 | TrGJTerC  | C721CHO + $h\nu$ → C721O2 + CO + HO <sub>2</sub>                                     | jx(ip_HOCH2CHO)                 | Rickard and Pascoe (2009)  |
| J48204 | TrGJTerC  | C721CO3H + $h\nu$ → C721O2 + CO <sub>2</sub> + OH                                    | jx(ip_CH300H)                   | Rickard and Pascoe (2009)  |
| J48205 | TrGJTerC  | C8BCOOH + $h\nu$ → C89O2 + OH                                                        | jx(ip_CH300H)                   | Rickard and Pascoe (2009)  |
| J48206 | TrGJTerC  | C89OOH + $h\nu$ → C810O2 + OH                                                        | jx(ip_CH300H)+jx(ip_HOCH2CHO)   | Rickard and Pascoe (2009)  |
| J48207 | TrGJTerCN | C89NO3 + $h\nu$ → C810O2 + NO <sub>2</sub>                                           | jx(ip_CH300H)+jx(ip_HOCH2CHO)   | Rickard and Pascoe (2009)  |
| J48208 | TrGJTerC  | C810OOH + $h\nu$ → CH <sub>3</sub> COCH <sub>3</sub> + C514O2 + OH                   | jx(ip_CH300H)+jx(ip_HOCH2CHO)   | Rickard and Pascoe (2009)  |
| J48209 | TrGJTerCN | C810NO3 + $h\nu$ → CH <sub>3</sub> COCH <sub>3</sub> + C514O2 + NO <sub>2</sub>      | 2.84*J_IC3H7N03+jx(ip_HOCH2CHO) | Rickard and Pascoe (2009)  |
| J48210 | TrGJTerCN | C8BCNO3 + $h\nu$ → C89O2 + NO <sub>2</sub>                                           | J_IC3H7N03                      | Rickard and Pascoe (2009)  |
| J48211 | TrGJTerC  | C85OOH + $h\nu$ → C86O2 + OH                                                         | jx(ip_CH300H)+J_ACETOL          | Rickard and Pascoe (2009)  |
| J48400 | TrGJAroC  | STYRENOOH + $h\nu$ → HO <sub>2</sub> + HCHO + BENZAL + OH                            | jx(ip_CH300H)                   | Rickard and Pascoe (2009)* |
| J49200 | TrGJTerC  | C96OOH + $h\nu$ → C97O2 + OH                                                         | jx(ip_CH300H)+J_ACETOL          | Rickard and Pascoe (2009)  |
| J49201 | TrGJTerC  | C97OOH + $h\nu$ → C98O2 + OH                                                         | jx(ip_CH300H)+J_ACETOL          | Rickard and Pascoe (2009)  |

Table 2: Photolysis reactions (... continued)

| #       | labels    | reaction                                                                  | rate coefficient                       | reference                                      |
|---------|-----------|---------------------------------------------------------------------------|----------------------------------------|------------------------------------------------|
| J49202  | TrGJTerC  | $C_9SOOH + h\nu \rightarrow C_6I_4O_2 + CH_3COCH_3 + OH$                  | $(jx(ip\_CH300H)+2.15*jx(ip\_MGLYOX))$ | Rickard and Pascoe (2009)                      |
| J49203a | TrGJTerC  | $NORPINAL + h\nu \rightarrow C_8SO_2 + CO + HO_2$                         | $jx(ip\_PINAL2HCO)$                    | Rickard and Pascoe (2009), Taraborrelli (2016) |
| J49203b | TrGJTerC  | $NORPINAL + h\nu \rightarrow NORPINENOL$                                  | $jx(ip\_PINAL2ENOL)$                   | Taraborrelli (2016), Andrews et al. (2012)     |
| J49204  | TrGJTerC  | $C_8CO_3H + h\nu \rightarrow C_8SO_2 + CO_2 + OH$                         | $jx(ip\_CH300H)+J\_ACETOL$             | Rickard and Pascoe (2009)                      |
| J49205  | TrGJTerC  | $C_8CO_2H + h\nu \rightarrow .8 C_8I_1CO_3 + .2 C_8SO_2 + .2 CO_2 + HO_2$ | $jx(ip\_HOCH2CHO)$                     | Rickard and Pascoe (2009)                      |
| J49206  | TrGJTerC  | $C_8CO_3H + h\nu \rightarrow .8 C_8I_1CO_3 + .2 C_8SO_2 + .2 CO_2 + OH$   | $jx(ip\_CH300H)+jx(ip\_HOCH2CHO)$      | Rickard and Pascoe (2009)                      |
| J49207  | TrGJTerC  | $C_8I_1CO_3H + h\nu \rightarrow C_8I_1O_2 + CO_2 + OH$                    | $jx(ip\_CH300H)$                       | Rickard and Pascoe (2009)                      |
| J49208  | TrGJTerC  | $NOPINDOOH + h\nu \rightarrow C_8CO_3 + OH$                               | $jx(ip\_CH300H)$                       | Rickard and Pascoe (2009)                      |
| J40200  | TrGJTerC  | $LAPINABOOH + h\nu \rightarrow PINAL + HO_2 + OH$                         | $jx(ip\_CH300H)$                       | Rickard and Pascoe (2009)                      |
| J40201  | TrGJTerC  | $MENTHEN_6ONE + h\nu \rightarrow RO_6R_1O_2 + OH$                         | $jx(ip\_CH300H)$                       | Vereecken et al. (2007)                        |
| J40202  | TrGJTerC  | $2OHMENTHEN_6ONE + h\nu \rightarrow 10 L_2CARBON + OH$                    | $jx(ip\_CH300H)$                       | Vereecken et al. (2007)                        |
| J40203a | TrGJTerC  | $PINAL + h\nu \rightarrow C_9SO_2 + CO + HO_2$                            | $jx(ip\_PINAL2HCO)$                    | Rickard and Pascoe (2009)                      |
| J40203b | TrGJTerC  | $PINAL + h\nu \rightarrow PINEOL$                                         | $jx(ip\_PINAL2ENOL)$                   | Taraborrelli (2016), Andrews et al. (2012)*    |
| J40204  | TrGJTerC  | $PERPINONIC + h\nu \rightarrow C_9SO_2 + CO_2 + OH$                       | $jx(ip\_CH300H)+J\_ACETOL$             | Rickard and Pascoe (2009)                      |
| J40205  | TrGJTerC  | $PINALOOH + h\nu \rightarrow C_10SO_2 + OH$                               | $jx(ip\_CH300H)+jx(ip\_HOCH2CHO)$      | Rickard and Pascoe (2009)                      |
| J40206  | TrGJTerCN | $PINALNO_3 + h\nu \rightarrow C_10SO_2 + NO_2$                            | $J\_IC3H7N03+jx(ip\_HOCH2CHO)$         | Rickard and Pascoe (2009)                      |
| J40207  | TrGJTerC  | $C_10SOOH + h\nu \rightarrow C_7I_6O_2 + CH_3COCH_3 + OH$                 | $jx(ip\_CH300H)+jx(ip\_HOCH2CHO)$      | Rickard and Pascoe (2009)                      |
| J40208  | TrGJTerCN | $C_10NO_3 + h\nu \rightarrow C_7I_6O_2 + CH_3COCH_3 + NO_2$               | $J\_IC3H7N03+ jx(ip\_HOCH2CHO)$        | Rickard and Pascoe (2009)                      |
| J40209  | TrGJTerC  | $C_10SOOH + h\nu \rightarrow C_8CO_3 + HCHO + OH$                         | $jx(ip\_CH300H)+jx(ip\_HOCH2CHO)$      | Rickard and Pascoe (2009)                      |
| J40210  | TrGJTerC  | $C_10CO + h\nu \rightarrow C_8CO_3 + CO + HO_2$                           | $jx(ip\_MGLYOX)+jx(ip\_HOCH2CHO)$      | Rickard and Pascoe (2009)                      |
| J40211  | TrGJTerCN | $LNAPINABOOH + h\nu \rightarrow PINAL + NO_2 + OH$                        | $jx(ip\_CH300H)$                       | Rickard and Pascoe (2009)                      |
| J40212  | TrGJTerC  | $BPINAOOH + h\nu \rightarrow NOPINONE + HCHO + HO_2 + OH$                 | $jx(ip\_CH300H)$                       | Rickard and Pascoe (2009)                      |
| J40213  | TrGJTerCN | $LNBPINABOOH + h\nu \rightarrow NOPINONE + HCHO + NO_2 + OH$              | $jx(ip\_CH300H)$                       | Rickard and Pascoe (2009)                      |
| J40214  | TrGJTerCN | $ROO_6R_1NO_3 + h\nu \rightarrow ROO_6R_3O_2 + CH_3COCH_3 + NO_2$         | $2.84*J\_IC3H7N03+jx(ip\_CH300H)$      | Taraborrelli (2016)                            |
| J40215  | TrGJTerCN | $RO_6R_1NO_3 + h\nu \rightarrow 9 L_2CARBON + HCHO + HO_2 + NO_2$         | $2.84*J\_IC3H7N03$                     | Taraborrelli (2016)                            |
| J6000   | StTrGJCl  | $Cl_2 + h\nu \rightarrow Cl + Cl$                                         | $jx(ip\_Cl2)$                          | Sander et al. (2014)                           |
| J6100   | StTrGJCl  | $Cl_2O_2 + h\nu \rightarrow 2 Cl$                                         | $jx(ip\_Cl2O2)$                        | Sander et al. (2014)                           |
| J6101   | StTrGJCl  | $OCIO + h\nu \rightarrow ClO + O(^3P)$                                    | $jx(ip\_OC10)$                         | Sander et al. (2014)                           |
| J6200   | StGJCl    | $HCl + h\nu \rightarrow Cl + H$                                           | $jx(ip\_HCl)$                          | Sander et al. (2014)                           |
| J6201   | StTrGJCl  | $HOCl + h\nu \rightarrow OH + Cl$                                         | $jx(ip\_HOCl)$                         | Sander et al. (2014)                           |

Table 2: Photolysis reactions (... continued)

| #           | labels     | reaction                                                                                                             | rate coefficient                                            | reference             |
|-------------|------------|----------------------------------------------------------------------------------------------------------------------|-------------------------------------------------------------|-----------------------|
| J6300       | TrGJCIN    | $\text{ClNO}_2 + h\nu \rightarrow \text{Cl} + \text{NO}_2$                                                           | $\text{jx}(\text{ip\_ClNO2})$                               | Sander et al. (2014)  |
| J6301a      | StTrGJCIN  | $\text{ClNO}_3 + h\nu \rightarrow \text{Cl} + \text{NO}_3$                                                           | $\text{jx}(\text{ip\_ClNO3})$                               | Sander et al. (2014)  |
| J6301b      | StTrGJCIN  | $\text{ClNO}_3 + h\nu \rightarrow \text{ClO} + \text{NO}_2$                                                          | $\text{jx}(\text{ip\_ClON02})$                              | Sander et al. (2014)  |
| J6400       | StGJCl     | $\text{CH}_3\text{Cl} + h\nu \rightarrow \text{Cl} + \text{CH}_3$                                                    | $\text{jx}(\text{ip\_CH3Cl})$                               | Sander et al. (2014)  |
| J6401       | StGJCl     | $\text{CCl}_4 + h\nu \rightarrow \text{LCARBON} + 4 \text{ Cl}$                                                      | $\text{jx}(\text{ip\_CC14})$                                | Sander et al. (2014)  |
| J6402       | StGJCCl    | $\text{CH}_3\text{CCl}_3 + h\nu \rightarrow 2 \text{ LCARBON} + 3 \text{ Cl}$                                        | $\text{jx}(\text{ip\_CH3CC13})$                             | Sander et al. (2014)  |
| J6500       | StGJCIF    | $\text{CFCl}_3 + h\nu \rightarrow \text{LCARBON} + \text{LFLUORINE} + 3 \text{ Cl}$                                  | $\text{jx}(\text{ip\_CFC13})$                               | Sander et al. (2014)  |
| J6501       | StGJCIF    | $\text{CF}_2\text{Cl}_2 + h\nu \rightarrow \text{LCARBON} + 2 \text{ LFLUORINE} + 2 \text{ Cl}$                      | $\text{jx}(\text{ip\_CF2Cl2})$                              | Sander et al. (2014)  |
| J7000       | StTrGJBr   | $\text{Br}_2 + h\nu \rightarrow \text{Br} + \text{Br}$                                                               | $\text{jx}(\text{ip\_Br2})$                                 | Sander et al. (2014)  |
| J7100       | StTrGJBr   | $\text{BrO} + h\nu \rightarrow \text{Br} + \text{O}(^3\text{P})$                                                     | $\text{jx}(\text{ip\_Br0})$                                 | Sander et al. (2014)  |
| J7200       | StTrGJBr   | $\text{HOBr} + h\nu \rightarrow \text{Br} + \text{OH}$                                                               | $\text{jx}(\text{ip\_HOBr})$                                | Sander et al. (2014)  |
| J7300       | TrGJBrN    | $\text{BrNO}_2 + h\nu \rightarrow \text{Br} + \text{NO}_2$                                                           | $\text{jx}(\text{ip\_BrNO2})$                               | Sander et al. (2014)  |
| J7301       | StTrGJBrN  | $\text{BrNO}_3 + h\nu \rightarrow .85 \text{ Br} + .85 \text{ NO}_3 + .15 \text{ BrO} + .15 \text{ NO}_2$            | $\text{jx}(\text{ip\_BrNO3})$                               | Sander et al. (2014)* |
| J7400       | StGJBr     | $\text{CH}_3\text{Br} + h\nu \rightarrow \text{Br} + \text{CH}_3$                                                    | $\text{jx}(\text{ip\_CH3Br})$                               | Sander et al. (2014)  |
| J7401       | TrGJBr     | $\text{CH}_2\text{Br}_2 + h\nu \rightarrow \text{LCARBON} + 2 \text{ Br}$                                            | $\text{jx}(\text{ip\_CH2Br2})$                              | Sander et al. (2014)  |
| J7402       | TrGJBr     | $\text{CHBr}_3 + h\nu \rightarrow \text{LCARBON} + 3 \text{ Br}$                                                     | $\text{jx}(\text{ip\_CHBr3})$                               | Sander et al. (2014)  |
| J7500       | StGJBrF    | $\text{CF}_3\text{Br} + h\nu \rightarrow \text{LCARBON} + 3 \text{ LFLUORINE} + \text{Br}$                           | $\text{jx}(\text{ip\_CF3Br})$                               | Sander et al. (2014)  |
| J7600       | StTrGJBrCl | $\text{BrCl} + h\nu \rightarrow \text{Br} + \text{Cl}$                                                               | $\text{jx}(\text{ip\_BrCl})$                                | Sander et al. (2014)  |
| J7601       | StGJBrClF  | $\text{CF}_2\text{ClBr} + h\nu \rightarrow \text{LCARBON} + 2 \text{ LFLUORINE} + \text{Br} + \text{Cl}$             | $\text{jx}(\text{ip\_CF2ClBr})$                             | Sander et al. (2014)  |
| J7602       | TrGJBrCl   | $\text{CH}_2\text{ClBr} + h\nu \rightarrow \text{LCARBON} + \text{Br} + \text{Cl}$                                   | $\text{jx}(\text{ip\_CH2ClBr})$                             | Sander et al. (2014)  |
| J7603       | TrGJBrCl   | $\text{CHCl}_2\text{Br} + h\nu \rightarrow \text{LCARBON} + \text{Br} + 2 \text{ Cl}$                                | $\text{jx}(\text{ip\_CHCl2Br})$                             | Sander et al. (2014)  |
| J7604       | TrGJBrCl   | $\text{CHClBr}_2 + h\nu \rightarrow \text{LCARBON} + 2 \text{ Br} + \text{Cl}$                                       | $\text{jx}(\text{ip\_CHClBr2})$                             | Sander et al. (2014)  |
| J8000       | TrGJI      | $\text{I}_2 + h\nu \rightarrow \text{I} + \text{I}$                                                                  | $\text{jx}(\text{ip\_I2})$                                  | Sander et al. (2014)  |
| J8100       | TrGJI      | $\text{IO} + h\nu \rightarrow \text{I} + \text{O}(^3\text{P})$                                                       | $\text{jx}(\text{ip\_IO})$                                  | Sander et al. (2014)  |
| J8200       | TrGJI      | $\text{HOI} + h\nu \rightarrow \text{I} + \text{OH}$                                                                 | $\text{jx}(\text{ip\_HOI})$                                 | Sander et al. (2014)  |
| J8300       | TrGJIN     | $\text{INO}_2 + h\nu \rightarrow \text{I} + \text{NO}_2$                                                             | $\text{jx}(\text{ip\_INO2})$                                | Sander et al. (2014)  |
| J8301       | TrGJIN     | $\text{INO}_3 + h\nu \rightarrow \text{I} + \text{NO}_3$                                                             | $\text{jx}(\text{ip\_INO3})$                                | Sander et al. (2014)  |
| J8400       | TrGJI      | $\text{CH}_2\text{I}_2 + h\nu \rightarrow 2 \text{ I} + 2 \text{ HO}_2 + \text{CO}$                                  | $\text{jx}(\text{ip\_CH2I2})$                               | Sander et al. (2014)  |
| J8401       | TrGJI      | $\text{CH}_3\text{I} + h\nu \rightarrow \text{I} + \text{CH}_3$                                                      | $\text{jx}(\text{ip\_CH3I})$                                | Sander et al. (2014)  |
| J8402       | TrGJCl     | $\text{CH}_3\text{CHICH}_3 + h\nu \rightarrow 2 \text{ LCARBON} + \text{I} + \text{CH}_3$                            | $\text{jx}(\text{ip\_C3H7I})$                               | Sander et al. (2014)  |
| J8403       | TrGJClI    | $\text{CH}_2\text{ClI} + h\nu \rightarrow \text{I} + \text{Cl} + 2 \text{ HO}_2 + \text{CO}$                         | $\text{jx}(\text{ip\_CH2ClI})$                              | Sander et al. (2014)  |
| J8600       | TrGJClI    | $\text{ICl} + h\nu \rightarrow \text{I} + \text{Cl}$                                                                 | $\text{jx}(\text{ip\_ICl})$                                 | Sander et al. (2014)  |
| J8700       | TrGJBrI    | $\text{IBr} + h\nu \rightarrow \text{I} + \text{Br}$                                                                 | $\text{jx}(\text{ip\_IBr})$                                 | Sander et al. (2014)  |
| PH3200_a01  | TrAa01JN   | $\text{NO}_3^-(\text{aq}) + h\nu \rightarrow \text{NO}_2(\text{aq}) + \text{OH}(\text{aq}) + \text{OH}^-(\text{aq})$ | $\text{xaer}(01)*\text{jx}(\text{ip\_NO2}) * 1.4\text{E-}4$ | see note*             |
| PH10200_a01 | TrAa01JHg  | $\text{Hg}(\text{OH})_2(\text{aq}) + h\nu \rightarrow \text{Hg}(\text{aq})$                                          | $\text{xaer}(01)*6\text{E-}5*\text{jx}(\text{ip\_NO2})$     | see note*             |

## General notes

J-values are calculated with an external module (e.g., JVAL) and then supplied to the MECCA chemistry.

Values that originate from the Master Chemical Mechanism (MCM) by Rickard and Pascoe (2009) are translated according in the following way:

J(11) → jx(ip\_COH2)  
J(12) → jx(ip\_CHOH)  
J(15) → jx(ip\_HOCH2CHO)  
J(18) → jx(ip\_MACR)  
J(22) → jx(ip\_ACETOL)  
J(23)+J(24) → jx(ip\_MVK)  
J(31)+J(32)+J(33) → jx(ip\_GLYOX)  
J(34) → jx(ip\_MGLYOX)  
J(41) → jx(ip\_CH3OOH)  
J(53) → J(iC3H7ONO2)  
J(54) → J(iC3H7ONO2)  
J(55) → J(iC3H7ONO2)  
J(56)+J(57) → jx(ip\_NOA)

## Specific notes

J41003: CH<sub>3</sub>- and CH<sub>2</sub>-channels are considered only and with their branching ratios being 0.42 and 0.48, respectively (Gans et al., 2011). CH-production is neglected. CH<sub>2</sub> is assumed to react only with O<sub>2</sub> yielding 1.44 H<sub>2</sub> + .18 HCHO + .18 O(<sup>3</sup>P) + .33 OH + .33 HO<sub>2</sub> + .44 CO<sub>2</sub> + .38 CO + .05 H<sub>2</sub>O as assumed in the WACCM model by J. Orlando (Doug Kinnison, pers. comm. with D. Taraborrelli).

J41006: product distribution as for HNO<sub>4</sub>

J42007: It is assumed that J(PHAN) is the same as J(PAN).

J42017: Enhancement of J according to Müller et al. (2014).

J42020: It is assumed that J(NO<sub>3</sub>CH<sub>2</sub>CHO) is the same as J(PAN).

J42021: In analogy to what is assumed for CH<sub>3</sub>O<sub>2</sub>NO<sub>2</sub> photolysis as in (Sander et al., 2014).

J43002: Following von Kuhlmann et al. (2003), we use J(CH<sub>3</sub>COCH<sub>2</sub>OH) = 0.11\*jx(ip\_CHOH). As an additional factor, the quantum yield of 0.65 is taken from Orlando et al. (1999a).

J43006: Following von Kuhlmann et al. (2003), we use J(iC<sub>3</sub>H<sub>7</sub>ONO<sub>2</sub>) = 3.7\*jx(ip\_PAN).

J43018: One third of the acetaldehyde channel is considered to be CH<sub>2</sub>CHOH according to Hjorth (2002) EUPHORE Report.

J43024: Assuming J(C<sub>3</sub>H<sub>7</sub>ONO<sub>2</sub>) = 0.59 × J(iC<sub>3</sub>H<sub>7</sub>ONO<sub>2</sub>), consistent with the photolysis rate coefficients used in the MCM (Rickard and Pascoe, 2009).

J43025a: Photolysis frequencies very similar to the ones of CH<sub>3</sub>CHO.

J43025b: Photolysis frequencies very similar to the ones of CH<sub>3</sub>CHO.

J43400: KDEC C3DIALO → GLYOX + CO + HO<sub>2</sub>

J44004: It is assumed that J(BIACET) is 2.15 times larger than J(MGLYOX), consistent with the photolysis rate coefficients used in the MCM (Rickard and Pascoe, 2009).

J44005a: It is assumed that J(LC4H9NO<sub>3</sub>) is the same as J(iC<sub>3</sub>H<sub>7</sub>ONO<sub>2</sub>).

J44005b: It is assumed that J(LC4H9NO<sub>3</sub>) is the same as J(iC<sub>3</sub>H<sub>7</sub>ONO<sub>2</sub>).

J44006: It is assumed that J(MPAN) is the same as J(PAN).

J44009: It is assumed that J(MACROOH) is 2.77 times larger than J(HOCH<sub>2</sub>CHO), consistent with the photolysis rate coefficients used in the MCM (Rickard and Pascoe, 2009).

J44010: It is assumed that J(MACROH) is 2.77 times larger than J(HOCH<sub>2</sub>CHO), consistent with the photolysis rate coefficients used in the MCM (Rickard and Pascoe, 2009).

J44015: It is assumed that J(BIACETOH) is 2.15 times larger than J(MGLYOX), consistent with the photolysis rate coefficients used in the MCM (Rickard and Pascoe, 2009).

J44017a: CO-channel yielding CH<sub>3</sub>COCH which upon reaction with O<sub>2</sub> produces an excited Criegee Intermediate assumed to be similar to MGLOOA in MCM. MGLOOA is produced also in other reactions and is substituted by its decomposition products. Furthermore, the stabilized Criegee Intermediate is assumed to solely react with water.

J44025: J values only for the secondary nitrate.

J44026: Like for LMEKNO<sub>3</sub> photolysis

J44027: 2.84\*J\_IC3H7NO3 like for other tertiary alkyl nitrates (see J4505). Enhancement of J according to Müller et al. (2014).

J44037b: Channel which produces just vinyl alcohol and not a larger enol via keto-enol photo-tautomerization.

J44043: The resulting vinyl peroxy radical is assumed to mostly form with HO<sub>2</sub> a labile hydroperoxide (see ketene formation). The products are further simplified.

J44044: 1,5-H-shift for the resulting vinyl peroxy radical assumed to be dominant.

J44046a: Simplified oxidation.

J44400b: KDEC MALDIALO → GLYOX + GLYOX + HO<sub>2</sub>

J44401: KDEC BZFUO  $\rightarrow$  CO14O3CHO + HO2  
 J44403: KDEC NBZFUO  $\rightarrow$  .5 CO14O3CHO + .5 NO2 + .5 NBZFUONE + .5 HO2  
 J44404b: KDEC MALDIALCO2  $\rightarrow$  .6 MALANHY + HO2 + .4 GLYOX + .4 CO  
 J44407: KDEC MALANHYO  $\rightarrow$  HCOCOHCOC3  
 J44414: KDEC MECOACETO  $\rightarrow$  CH3CO3 + HCHO  
 J45003: It is assumed that  $J(\text{LISOPACNO}_3) = 0.59 \times J(\text{iC}_3\text{H}_7\text{ONO}_2)$ , consistent with the photolysis rate coefficients used in the MCM (Rickard and Pascoe, 2009).  
 J45005: It is assumed that  $J(\text{ISOPBNO}_3) = 2.84 \times J(\text{iC}_3\text{H}_7\text{ONO}_2)$ , consistent with the photolysis rate coefficients used in the MCM (Rickard and Pascoe, 2009).  
 J45007: It is assumed that  $J(\text{ISOPDNO}_3)$  is the same as  $J(\text{iC}_3\text{H}_7\text{ONO}_2)$ .  
 J45009:  $0.59 \times J(\text{IC}_3\text{H}_7\text{NO}_3)$  like for other primary alkyl nitrates (see J4503). Enhancement of J according to Müller et al. (2014).  
 J45015: Consistent with the MCM (Rickard and Pascoe, 2009), we assume that  $J(\text{HCOC}_5)$  is half as large as  $J(\text{MVK})$ . With exception of HOCH2CO the products of MACO2 decomposition without CO2.  
 J45032: approximation with 4-oxo-pentenal photolysis combining results of Thner et al(2004) and Xiang et al(2007)  
 J45402: KDEC C5DIALO  $\rightarrow$  MALDIAL + CO + HO2  
 J45407: KDEC TLFUONE  $\rightarrow$  .6 C5CO14O2 + .6 HO2 + .4 TLFUONE  
 J45410: KDEC MMALANHYO  $\rightarrow$  CO2H3CO3  
 J45411: KDEC C5DICARBO  $\rightarrow$  MGLYOX + GLYOX + HO2  
 J45412: KDEC NTLFUO  $\rightarrow$  ACCOMECHO + NO2  
 J45414: KDEC C5CO14CO2  $\rightarrow$  .83 MALANHY + .83 CH3 + .17 MGLYOX + .17 HO2 + .17 CO + .17 CO2  
 J45415: KDEC TLFUO  $\rightarrow$  ACCOMECHO + HO2  
 J46400: KDEC PHENO  $\rightarrow$  .71 MALDALCO2H + .71 GLYOX + .29 PBZQONE + HO2  
 J46403: KDEC NDNPHENO  $\rightarrow$  NC4DCO2H + HNO3 + CO + CO + NO2  
 J46404: KDEC BZBIPERO  $\rightarrow$  GLYOX + HO2 + .5 BZFUONE + .5 BZFUONE  
 J46405: new channel created for nitrophenol decomposition  
 J46406: new channel created for nitrophenol decomposition  
 J46412: KDEC NNCATECO  $\rightarrow$  NC4DCO2H + HCOCO2H + NO2  
 J46415: KDEC NCATECO  $\rightarrow$  NC4DCO2H + HCOCO2H + HO2  
 J46416: KDEC PBZQO  $\rightarrow$  C5CO2OHCO3  
 J46418: KDEC BZBIPERO  $\rightarrow$  GLYOX + HO2 + .5 BZFUONE + .5 BZFUONE  
 J46419: KDEC NBZQO  $\rightarrow$  C6CO4DB + NO2  
 J46422: KDEC DNPHEO  $\rightarrow$  NC4DCO2H + HCOCO2H + NO2  
 J46425: KDEC BZEMUCO  $\rightarrow$  .5 EPXC4DIAL + .5 GLYOX + .5 HO2 + .5 C3DIALO2 + .5 C32OH13CO  
 J46429: new channel  
 J47401: KROPRIM\*O2 fast reaction C6H5CH2O = BENZAL + HO2  
 J47402: KROPRIM\*O2 fast reaction C6H5CH2O = BENZAL + HO2  
 J47404: KDEC TLBIPERO  $\rightarrow$  .6 GLYOX + .4 MGLYOX + HO2 + .2 ZCODC23DBCOD + .2 C5DICARB + .2 TLFUONE + .2 BZFUONE + .2 MALDIAL  
 J47405: KDEC TLBIPERO  $\rightarrow$  .6 GLYOX + .4 MGLYOX + HO2 + .2 ZCODC23DBCOD + .2 C5DICARB + .2 TLFUONE + .2 BZFUONE + .2 MALDIAL  
 J47407: KDEC CRESO  $\rightarrow$  .68 C5CO14OH + .68 GLYOX + HO2 + .32 PTLQONE  
 J47408a: KDEC CRESO  $\rightarrow$  .68 C5CO14OH + .68 GLYOX + HO2 + .32 PTLQONE  
 J47408b: KDEC NCRESO  $\rightarrow$  C5CO14OH + GLYOX + NO2  
 J47409: Using J for 3-methyl-2-nitrophenol.  
 J47412: KDEC TLEMUCO  $\rightarrow$  .5 C3DIALO2 + .5 CO2H3CHO + .5 EPXC4DIAL + .5 MGLYOX + .5 HO2  
 J47417: Using J for 3-methyl-2-nitrophenol.  
 J47418: new channel  
 J47419: Using J for 3-methyl-2-nitrophenol.  
 J47420: new channel  
 J47422: KDEC NP TLQO  $\rightarrow$  C7CO4DB + NO2  
 J47423: KDEC PTLQO  $\rightarrow$  C6CO2OHCO3  
 J47425: KDEC MNNCATECO  $\rightarrow$  NC4MDCO2H + HCOCO2H + NO2  
 J47426: KDEC MNCATECO  $\rightarrow$  NC4MDCO2H + HCOCO2H + HO2  
 J47428: KDEC NDNCRESO  $\rightarrow$  NC4MDCO2H + HNO3 + CO + CO + NO2  
 J47429: KDEC DNCRESO  $\rightarrow$  NC4MDCO2H + HCOCO2H + NO2  
 J48400: KDEC STYRENO  $\rightarrow$  HO2 + HCHO + BENZAL  
 J40203b: Substituted vinyl alcohol in analogy to CH3CHO photolysis.  
 J7301: The quantum yields are recommended by Sander et al. (2011) for  $\lambda > 300\text{nm}$  and used here for the entire spectrum.  
 PH3200\_a01: Scaled to  $J(\text{NO}_2)$  so that its lifetime is about 10.5 days, as suggested by Zellner et al. (1990).  
 PH10200\_a01: Scaled to  $J(\text{NO}_2)$  so that it produces about  $3.0 \times 10^{-7}$ .

Table 3: Henry's law coefficients

| substance                                    | $k_H^\ominus$<br>M/atm               | $-\frac{\Delta_{\text{soln}}H}{R}$<br>K | reference                       |
|----------------------------------------------|--------------------------------------|-----------------------------------------|---------------------------------|
| O <sub>2</sub>                               | $1.3 \times 10^{-3}$                 | 1500.                                   | Wilhelm et al. (1977)           |
| O <sub>3</sub>                               | $1.2 \times 10^{-2}$                 | 2560.                                   | Chameides (1984)                |
| OH                                           | $3.0 \times 10^1$                    | 4300.                                   | Hanson et al. (1992)            |
| HO <sub>2</sub>                              | $3.9 \times 10^3$                    | 5900.                                   | Hanson et al. (1992)            |
| H <sub>2</sub> O <sub>2</sub>                | $1. \times 10^5$                     | 6338.                                   | Lind and Kok (1994)             |
| H <sub>2</sub> O                             | BIG                                  | 0.                                      | see note                        |
| NH <sub>3</sub>                              | 58.                                  | 4085.                                   | Chameides (1984)                |
| NO                                           | $1.9 \times 10^{-3}$                 | 1480.                                   | Schwartz and White (1981)       |
| NO <sub>2</sub>                              | $7.0 \times 10^{-3}$                 | 2500.                                   | Lee and Schwartz (1981)*        |
| NO <sub>3</sub>                              | 2.                                   | 2000.                                   | Thomas et al. (1993)            |
| N <sub>2</sub> O <sub>5</sub>                | BIG                                  | 0.                                      | see note                        |
| HONO                                         | $4.9 \times 10^1$                    | 4780.                                   | Schwartz and White (1981)       |
| HNO <sub>3</sub>                             | $2.45 \times 10^6 / 1.5 \times 10^1$ | 8694.                                   | Brimblecombe and Clegg (1989)*  |
| HNO <sub>4</sub>                             | $1.2 \times 10^4$                    | 6900.                                   | Régimbal and Mozurkewich (1997) |
| CH <sub>3</sub> OH                           | $2.20 \times 10^2$                   | 5200.                                   | Snider and Dawson (1985)        |
| CH <sub>3</sub> O <sub>2</sub>               | 6.                                   | 5600.                                   | Jacob (1986)*                   |
| CH <sub>3</sub> OOH                          | $3.0 \times 10^2$                    | 5322.                                   | Lind and Kok (1994)             |
| CO <sub>2</sub>                              | $3.1 \times 10^{-2}$                 | 2423.                                   | Chameides (1984)                |
| HCHO                                         | $7.0 \times 10^3$                    | 6425.                                   | Chameides (1984)                |
| HCOOH                                        | $3.7 \times 10^3$                    | 5700.                                   | Chameides (1984)                |
| CH <sub>3</sub> COOH                         | $4.1 \times 10^3$                    | 6200.                                   | Sander et al. (2006)            |
| PAN                                          | 2.8                                  | 5730.                                   | Sander et al. (2006)            |
| C <sub>2</sub> H <sub>5</sub> O <sub>2</sub> | 6.                                   | 5600.                                   | see note                        |
| CH <sub>3</sub> CHO                          | $1.29 \times 10^1$                   | 5890.                                   | Sander et al. (2006)            |
| GLYOX                                        | $4.19 \times 10^5$                   | 7481.                                   | Sander et al. (2011)            |
| HOCH <sub>2</sub> CO <sub>2</sub> H          | $2.83 \times 10^4$                   | 4029.                                   | Ip et al. (2009)                |
| HOCH <sub>2</sub> CHO                        | $4.10 \times 10^4$                   | 4600.                                   | Betterton and Hoffmann (1988a)  |
| CH <sub>3</sub> COCH <sub>3</sub>            | 28.1                                 | 5050.                                   | Sander et al. (2006)            |
| MGLYOX                                       | $3.70 \times 10^3$                   | 7500.                                   | Betterton and Hoffmann (1988a)  |
| Cl <sub>2</sub>                              | $9.2 \times 10^{-2}$                 | 2081.                                   | Bartlett and Margerum (1999)    |
| HCl                                          | 2./1.7                               | 9001.                                   | Brimblecombe and Clegg (1989)   |
| HOCl                                         | $6.6 \times 10^2$                    | 5862.                                   | Huthwelker et al. (1995)        |
| ClNO <sub>3</sub>                            | BIG                                  | 0.                                      | see note                        |

Table 3: Henry's law coefficients (... continued)

| substance                         | $k_H^\ominus$<br>M/atm | $-\frac{\Delta_{\text{soln}}H}{R}$<br>K | reference                      |
|-----------------------------------|------------------------|-----------------------------------------|--------------------------------|
| Br <sub>2</sub>                   | $7.7 \times 10^{-1}$   | 3837.                                   | Bartlett and Margerum (1999)   |
| HBr                               | 1.3                    | 10239.                                  | Brimblecombe and Clegg (1989)* |
| HOBr                              | $1.3 \times 10^3$      | 5862.                                   | Blatchley et al. (1992)*       |
| BrNO <sub>3</sub>                 | BIG                    | 0.                                      | see note                       |
| BrCl                              | $9.4 \times 10^{-1}$   | 5600.                                   | Bartlett and Margerum (1999)   |
| I <sub>2</sub>                    | 3.                     | 4431.                                   | Palmer et al. (1985)           |
| IO                                | $4.5 \times 10^2$      | 5862.                                   | see note                       |
| OIO                               | BIG                    | 0.                                      | see note                       |
| I <sub>2</sub> O <sub>2</sub>     | BIG                    | 0.                                      | see note                       |
| HI                                | BIG                    | 0.                                      | see note                       |
| HOI                               | $4.5 \times 10^2$      | 5862.                                   | Chatfield and Crutzen (1990)*  |
| HIO <sub>3</sub>                  | BIG                    | 0.                                      | see note                       |
| INO <sub>2</sub>                  | BIG                    | 0.                                      | see note                       |
| INO <sub>3</sub>                  | BIG                    | 0.                                      | see note                       |
| ICl                               | $1.1 \times 10^2$      | 5600.                                   | see note                       |
| IBr                               | $2.4 \times 10^1$      | 5600.                                   | see note                       |
| SO <sub>2</sub>                   | 1.2                    | 3120.                                   | Chameides (1984)               |
| H <sub>2</sub> SO <sub>4</sub>    | $1. \times 10^{11}$    | 0.                                      | see note                       |
| CH <sub>3</sub> SO <sub>3</sub> H | BIG                    | 0.                                      | see note                       |
| DMS                               | $5.4 \times 10^{-1}$   | 3500.                                   | Staudinger and Roberts (2001)  |
| DMSO                              | $5. \times 10^4$       | 6425.                                   | De Bruyn et al. (1994)*        |
| Hg                                | 0.13                   | 0.                                      | Schroeder and Munthe (1998)    |
| HgO                               | $3.2 \times 10^6$      | 0.                                      | Shon et al. (2005)             |
| HgCl <sub>2</sub>                 | $2.4 \times 10^7$      | 0.                                      | Shon et al. (2005)             |
| HgBr <sub>2</sub>                 | $2.4 \times 10^7$      | 0.                                      | see note                       |
| HgCl                              | $2.4 \times 10^7$      | 0.                                      | Shon et al. (2005)             |
| HgBr                              | $2.4 \times 10^7$      | 0.                                      | see note                       |
| ClHgBr                            | $2.4 \times 10^7$      | 0.                                      | see note                       |
| BrHgOBr                           | $2.4 \times 10^7$      | 0.                                      | see note                       |
| ClHgOBr                           | $2.4 \times 10^7$      | 0.                                      | see note                       |

## General notes

The value “BIG” corresponds to virtually infinite solubility which is represented in the model using a very large but arbitrary number.

The temperature dependence of the Henry constants is:

$$K_H = K_H^\ominus \times \exp\left(\frac{-\Delta_{\text{soln}}H}{R} \left(\frac{1}{T} - \frac{1}{T^\ominus}\right)\right)$$

where  $\Delta_{\text{soln}}H$  = molar enthalpy of dissolution [J/mol] and  $R = 8.314$  J/(mol K).

## Specific notes

NO<sub>2</sub>: The temperature dependence is from Chameides (1984).

HNO<sub>3</sub>: Calculated using the acidity constant from Davis and de Bruin (1964).

CH<sub>3</sub>O<sub>2</sub>: This value was estimated by Jacob (1986).

C<sub>2</sub>H<sub>5</sub>O<sub>2</sub>: Assumed to be the same as  $K_H(\text{CH}_3\text{O}_2)$ .

HBr: Calculated using the acidity constant from Lax (1969).

HOBr: Twice the value of HOCl, according to Blatchley et al. (1992). Same temperature dependence as for HOCl assumed.

IO: Assumed to be the same as  $K_H(\text{HOI})$ .

HOI: Lower limit.

ICl: Calculated using thermodynamic data from Wagman et al. (1982).

IBr: Calculated using thermodynamic data from Wagman et al. (1982).

H<sub>2</sub>SO<sub>4</sub>: To account for the very high Henry's law coefficient of H<sub>2</sub>SO<sub>4</sub>, a very high value was chosen arbitrarily.

DMSO: Lower limit cited from another reference.

HgBr<sub>2</sub>: Assumed to be the same as for HgCl<sub>2</sub>.

ClHgBr: Assumed to be the same as for HgCl<sub>2</sub>.

BrHgOBr: Assumed to be the same as for HgCl<sub>2</sub>.

ClHgOBr: Assumed to be the same as for HgCl<sub>2</sub>.



Table 4: Accommodation coefficients

| substance                                    | $\alpha^\ominus$      | $\frac{-\Delta_{\text{obs}}H/R}{K}$ | reference                     |
|----------------------------------------------|-----------------------|-------------------------------------|-------------------------------|
| O <sub>2</sub>                               | 0.01                  | 2000.                               | see note                      |
| O <sub>3</sub>                               | 0.002                 | (default)                           | DeMore et al. (1997)*         |
| OH                                           | 0.01                  | (default)                           | Takami et al. (1998)*         |
| HO <sub>2</sub>                              | 0.5                   | (default)                           | Thornton and Abbatt (2005)    |
| H <sub>2</sub> O <sub>2</sub>                | 0.077                 | 3127.                               | Worsnop et al. (1989)         |
| H <sub>2</sub> O                             | 0.0                   | (default)                           | see note                      |
| NH <sub>3</sub>                              | 0.06                  | (default)                           | DeMore et al. (1997)*         |
| NO                                           | $5.0 \times 10^{-5}$  | (default)                           | Saastad et al. (1993)*        |
| NO <sub>2</sub>                              | 0.0015                | (default)                           | Ponche et al. (1993)*         |
| NO <sub>3</sub>                              | 0.04                  | (default)                           | Rudich et al. (1996)*         |
| N <sub>2</sub> O <sub>5</sub>                | (default)             | (default)                           | DeMore et al. (1997)*         |
| HONO                                         | 0.04                  | (default)                           | DeMore et al. (1997)*         |
| HNO <sub>3</sub>                             | 0.5                   | (default)                           | Abbatt and Waschewsky (1998)* |
| HNO <sub>4</sub>                             | (default)             | (default)                           | DeMore et al. (1997)*         |
| CH <sub>3</sub> OH                           | (default)             | (default)                           | see note                      |
| CH <sub>3</sub> O <sub>2</sub>               | 0.01                  | 2000.                               | see note                      |
| CH <sub>3</sub> OOH                          | 0.0046                | 3273.                               | Magi et al. (1997)            |
| CO <sub>2</sub>                              | 0.01                  | 2000.                               | see note                      |
| HCHO                                         | 0.04                  | (default)                           | DeMore et al. (1997)*         |
| HCOOH                                        | 0.014                 | 3978.                               | DeMore et al. (1997)          |
| CH <sub>3</sub> COOH                         | $2.0 \times 10^{-2}$  | 4079.                               | Davidovits et al. (1995)      |
| PAN                                          | (default)             | (default)                           | see note                      |
| C <sub>2</sub> H <sub>5</sub> O <sub>2</sub> | (default)             | (default)                           | see note                      |
| CH <sub>3</sub> CHO                          | $3.0 \times 10^{-2}$  | (default)                           | see note                      |
| GLYOX                                        | (default)             | (default)                           | see note                      |
| HOCH <sub>2</sub> CO <sub>2</sub> H          | (default)             | (default)                           | see note                      |
| HOCH <sub>2</sub> CHO                        | (default)             | (default)                           | see note                      |
| CH <sub>3</sub> COCH <sub>3</sub>            | $3.72 \times 10^{-3}$ | 6395.                               | Davidovits et al. (1995)      |
| MGLYOX                                       | (default)             | (default)                           | see note                      |
| Cl <sub>2</sub>                              | 0.038                 | 6546.                               | Hu et al. (1995)              |
| HCl                                          | 0.074                 | 3072.                               | Schweitzer et al. (2000)*     |
| HOCl                                         | 0.5                   | (default)                           | see note                      |
| ClNO <sub>3</sub>                            | 0.108                 | (default)                           | Deiber et al. (2004)*         |
| Br <sub>2</sub>                              | 0.038                 | 6546.                               | Hu et al. (1995)              |

Table 4: Accommodation coefficients (... continued)

| substance                         | $\alpha^\ominus$ | $\frac{-\Delta_{\text{obs}}H/R}{K}$ | reference                     |
|-----------------------------------|------------------|-------------------------------------|-------------------------------|
| HBr                               | 0.032            | 3940.                               | Schweitzer et al. (2000)*     |
| HOBr                              | 0.5              | (default)                           | Abbatt and Waschewsky (1998)* |
| BrNO <sub>3</sub>                 | 0.063            | (default)                           | Deiber et al. (2004)*         |
| BrCl                              | 0.038            | 6546.                               | see note                      |
| I <sub>2</sub>                    | 0.01             | 2000.                               | see note                      |
| IO                                | 0.5              | 2000.                               | see note                      |
| OIO                               | 0.01             | (default)                           | see note                      |
| I <sub>2</sub> O <sub>2</sub>     | (default)        | 2000.                               | see note                      |
| HI                                | 0.036            | 4130.                               | Schweitzer et al. (2000)*     |
| HOI                               | 0.5              | (default)                           | see note                      |
| HIO <sub>3</sub>                  | 0.01             | (default)                           | see note                      |
| INO <sub>2</sub>                  | (default)        | 2000.                               | see note                      |
| INO <sub>3</sub>                  | (default)        | 2000.                               | see note                      |
| ICl                               | 0.018            | 2000.                               | Braban et al. (2007)          |
| IBr                               | 0.018            | 2000.                               | see note                      |
| SO <sub>2</sub>                   | 0.11             | (default)                           | DeMore et al. (1997)          |
| H <sub>2</sub> SO <sub>4</sub>    | 0.65             | (default)                           | Pöschl et al. (1998)*         |
| CH <sub>3</sub> SO <sub>3</sub> H | 0.076            | 1762.                               | De Bruyn et al. (1994)        |
| DMS                               | (default)        | (default)                           | see note                      |
| DMSO                              | 0.048            | 2578.                               | De Bruyn et al. (1994)        |
| Hg                                | (default)        | (default)                           | see note                      |
| HgO                               | (default)        | (default)                           | see note                      |
| HgCl <sub>2</sub>                 | (default)        | (default)                           | see note                      |
| HgBr <sub>2</sub>                 | (default)        | (default)                           | see note                      |
| HgCl                              | (default)        | (default)                           | see note                      |
| HgBr                              | (default)        | (default)                           | see note                      |
| ClHgBr                            | (default)        | (default)                           | see note                      |
| BrHgOBr                           | (default)        | (default)                           | see note                      |
| ClHgOBr                           | (default)        | (default)                           | see note                      |

## General notes

If no data are available, the following default values are used:

$$\alpha^\ominus = 0.1$$

$$-\Delta_{\text{obs}}H/R = 0 \text{ K}$$

efficients is given by (Jayne et al., 1991):

The temperature dependence of the accommodation co-

$$\begin{aligned}\frac{\alpha}{1-\alpha} &= \exp\left(\frac{-\Delta_{\text{obs}}G}{RT}\right) \\ &= \exp\left(\frac{-\Delta_{\text{obs}}H}{RT} + \frac{\Delta_{\text{obs}}S}{R}\right)\end{aligned}$$

where  $\Delta_{\text{obs}}G$  is the Gibbs free energy barrier of the transition state toward solution (Jayne et al., 1991), and  $\Delta_{\text{obs}}H$  and  $\Delta_{\text{obs}}S$  are the corresponding enthalpy and entropy, respectively. The equation can be rearranged to:

$$\ln\left(\frac{\alpha}{1-\alpha}\right) = \frac{-\Delta_{\text{obs}}H}{R} \times \frac{1}{T} + \frac{-\Delta_{\text{obs}}S}{R}$$

and further:

$$d \ln\left(\frac{\alpha}{1-\alpha}\right) / d\left(\frac{1}{T}\right) = \frac{-\Delta_{\text{obs}}H}{R}$$

## Specific notes

O<sub>2</sub>: Estimate.

O<sub>3</sub>: Value measured at 292 K.

OH: Value measured at 293 K.

NH<sub>3</sub>: Value measured at 295 K.

NO: Value measured between 193 and 243 K.

NO<sub>2</sub>: Value measured at 298 K.

NO<sub>3</sub>: Value is a lower limit, measured at 273 K.

N<sub>2</sub>O<sub>5</sub>: Value for sulfuric acid, measured between 195 and 300 K.

HONO: Value measured between 247 and 297 K.

HNO<sub>3</sub>: Value measured at room temperature. Abbatt and Waschewsky (1998) say  $\gamma > 0.2$ . Here  $\alpha = 0.5$  is used.

HNO<sub>4</sub>: Value measured at 200 K for water ice.

CH<sub>3</sub>O<sub>2</sub>: Estimate.

CO<sub>2</sub>: Estimate.

HCHO: Value measured between 260 and 270 K.

PAN: Estimate.

C<sub>2</sub>H<sub>5</sub>O<sub>2</sub>: Estimate.

CH<sub>3</sub>CHO: Using the same estimate as in the CAPRAM 2.4 model ([http://projects.tropos.de/capram/capram\\_24.html](http://projects.tropos.de/capram/capram_24.html)).

HCl: Temperature dependence derived from published data at 2 different temperatures

HOCl: Assumed to be the same as  $\alpha(\text{HOBr})$ .

ClNO<sub>3</sub>: Value measured at 274.5 K.

HBr: Temperature dependence derived from published data at 2 different temperatures

HOBr: Value measured at room temperature. Abbatt and Waschewsky (1998) say  $\gamma > 0.2$ . Here  $\alpha = 0.5$  is used.

BrNO<sub>3</sub>: Value measured at 273 K.

BrCl: Assumed to be the same as  $\alpha(\text{Cl}_2)$ .

I<sub>2</sub>: Estimate.

IO: Estimate.

OIO: Estimate.

I<sub>2</sub>O<sub>2</sub>: Estimate.

HI: Temperature dependence derived from published data at 2 different temperatures

HOI: Assumed to be the same as  $\alpha(\text{HOBr})$ . See also Mössinger and Cox (2001) and Holmes et al. (2001).

HIO<sub>3</sub>: Estimate.

INO<sub>2</sub>: Estimate.

INO<sub>3</sub>: Estimate.

IBr: Assumed to be the same as  $\alpha(\text{ICl})$ .

H<sub>2</sub>SO<sub>4</sub>: Value measured at 303 K.

Hg: Estimate.

HgO: Estimate.

HgCl<sub>2</sub>: Estimate.

HgBr<sub>2</sub>: Estimate.

ClHgBr: Estimate.

BrHgOBr: Estimate.

ClHgOBr: Estimate.

Table 5: Reversible (Henry’s law) equilibria and irreversible (“heterogenous”) uptake

| #          | labels          | reaction                                   | rate coefficient                                    | reference                                  |
|------------|-----------------|--------------------------------------------|-----------------------------------------------------|--------------------------------------------|
| H1000f_a01 | TrAa01Sc        | $O_2 \rightarrow O_2(aq)$                  | $k_{\text{exf}}(01, \text{ind}_{O2})$               | see general notes*                         |
| H1000b_a01 | TrAa01Sc        | $O_2(aq) \rightarrow O_2$                  | $k_{\text{exb}}(01, \text{ind}_{O2})$               | see general notes*                         |
| H1001f_a01 | TrAa01MblScScm  | $O_3 \rightarrow O_3(aq)$                  | $k_{\text{exf}}(01, \text{ind}_{O3})$               | see general notes*                         |
| H1001b_a01 | TrAa01MblScScm  | $O_3(aq) \rightarrow O_3$                  | $k_{\text{exb}}(01, \text{ind}_{O3})$               | see general notes*                         |
| H2100f_a01 | TrAa01Sc        | $OH \rightarrow OH(aq)$                    | $k_{\text{exf}}(01, \text{ind}_{OH})$               | see general notes*                         |
| H2100b_a01 | TrAa01Sc        | $OH(aq) \rightarrow OH$                    | $k_{\text{exb}}(01, \text{ind}_{OH})$               | see general notes*                         |
| H2101f_a01 | TrAa01Sc        | $HO_2 \rightarrow HO_2(aq)$                | $k_{\text{exf}}(01, \text{ind}_{HO2})$              | see general notes*                         |
| H2101b_a01 | TrAa01Sc        | $HO_2(aq) \rightarrow HO_2$                | $k_{\text{exb}}(01, \text{ind}_{HO2})$              | see general notes*                         |
| H2102f_a01 | TrAa01MblScScm  | $H_2O_2 \rightarrow H_2O_2(aq)$            | $k_{\text{exf}}(01, \text{ind}_{H2O2})$             | see general notes*                         |
| H2102b_a01 | TrAa01MblScScm  | $H_2O_2(aq) \rightarrow H_2O_2$            | $k_{\text{exb}}(01, \text{ind}_{H2O2})$             | see general notes*                         |
| H3101f_a01 | TrAa01ScN       | $NO_2 \rightarrow NO_2(aq)$                | $k_{\text{exf}}(01, \text{ind}_{NO2})$              | see general notes*                         |
| H3101b_a01 | TrAa01ScN       | $NO_2(aq) \rightarrow NO_2$                | $k_{\text{exb}}(01, \text{ind}_{NO2})$              | see general notes*                         |
| H3102f_a01 | TrAa01ScN       | $NO_3 \rightarrow NO_3(aq)$                | $k_{\text{exf}}(01, \text{ind}_{NO3})$              | see general notes*                         |
| H3102b_a01 | TrAa01ScN       | $NO_3(aq) \rightarrow NO_3$                | $k_{\text{exb}}(01, \text{ind}_{NO3})$              | see general notes*                         |
| H3200f_a01 | TrAa01MblScScmN | $NH_3 \rightarrow NH_3(aq)$                | $k_{\text{exf}}(01, \text{ind}_{NH3})$              | see general notes*                         |
| H3200b_a01 | TrAa01MblScScmN | $NH_3(aq) \rightarrow NH_3$                | $k_{\text{exb}}(01, \text{ind}_{NH3})$              | see general notes*                         |
| H3201_a01  | TrAa01MblScScmN | $N_2O_5 \rightarrow HNO_3(aq) + HNO_3(aq)$ | $k_{\text{exf\_N205}}(01)*C(\text{ind}_{H2O\_a01})$ | Behnke et al. (1994), Behnke et al. (1997) |
| H3202f_a01 | TrAa01ScN       | $HONO \rightarrow HONO(aq)$                | $k_{\text{exf}}(01, \text{ind}_{HONO})$             | see general notes*                         |
| H3202b_a01 | TrAa01ScN       | $HONO(aq) \rightarrow HONO$                | $k_{\text{exb}}(01, \text{ind}_{HONO})$             | see general notes*                         |
| H3203f_a01 | TrAa01MblScScmN | $HNO_3 \rightarrow HNO_3(aq)$              | $k_{\text{exf}}(01, \text{ind}_{HNO3})$             | see general notes*                         |
| H3203b_a01 | TrAa01MblScScmN | $HNO_3(aq) \rightarrow HNO_3$              | $k_{\text{exb}}(01, \text{ind}_{HNO3})$             | see general notes*                         |
| H3204f_a01 | TrAa01ScN       | $HNO_4 \rightarrow HNO_4(aq)$              | $k_{\text{exf}}(01, \text{ind}_{HNO4})$             | see general notes*                         |
| H3204b_a01 | TrAa01ScN       | $HNO_4(aq) \rightarrow HNO_4$              | $k_{\text{exb}}(01, \text{ind}_{HNO4})$             | see general notes*                         |
| H4100f_a01 | TrAa01MblScScm  | $CO_2 \rightarrow CO_2(aq)$                | $k_{\text{exf}}(01, \text{ind}_{CO2})$              | see general notes*                         |
| H4100b_a01 | TrAa01MblScScm  | $CO_2(aq) \rightarrow CO_2$                | $k_{\text{exb}}(01, \text{ind}_{CO2})$              | see general notes*                         |
| H4101f_a01 | TrAa01ScScm     | $HCHO \rightarrow HCHO(aq)$                | $k_{\text{exf}}(01, \text{ind}_{HCHO})$             | see general notes*                         |
| H4101b_a01 | TrAa01ScScm     | $HCHO(aq) \rightarrow HCHO$                | $k_{\text{exb}}(01, \text{ind}_{HCHO})$             | see general notes*                         |
| H4102f_a01 | TrAa01Sc        | $CH_3O_2 \rightarrow CH_3OO(aq)$           | $k_{\text{exf}}(01, \text{ind}_{CH3O2})$            | see general notes*                         |
| H4102b_a01 | TrAa01Sc        | $CH_3OO(aq) \rightarrow CH_3O_2$           | $k_{\text{exb}}(01, \text{ind}_{CH3O2})$            | see general notes*                         |
| H4103f_a01 | TrAa01ScScm     | $HCOOH \rightarrow HCOOH(aq)$              | $k_{\text{exf}}(01, \text{ind}_{HCOOH})$            | see general notes*                         |
| H4103b_a01 | TrAa01ScScm     | $HCOOH(aq) \rightarrow HCOOH$              | $k_{\text{exb}}(01, \text{ind}_{HCOOH})$            | see general notes*                         |
| H4104f_a01 | TrAa01ScScm     | $CH_3OOH \rightarrow CH_3OOH(aq)$          | $k_{\text{exf}}(01, \text{ind}_{CH3OOH})$           | see general notes*                         |
| H4104b_a01 | TrAa01ScScm     | $CH_3OOH(aq) \rightarrow CH_3OOH$          | $k_{\text{exb}}(01, \text{ind}_{CH3OOH})$           | see general notes*                         |

Table 5: Reversible (Henry's law) equilibria and irreversible ("heterogenous") uptake

| #          | labels           | reaction                                                                                                    | rate coefficient                                      | reference                                  |
|------------|------------------|-------------------------------------------------------------------------------------------------------------|-------------------------------------------------------|--------------------------------------------|
| H6000f_a01 | TrAa01MblScCl    | $\text{Cl}_2 \rightarrow \text{Cl}_2(\text{aq})$                                                            | $k_{\text{exf}}(01, \text{ind\_Cl2})$                 | see general notes*                         |
| H6000b_a01 | TrAa01MblScCl    | $\text{Cl}_2(\text{aq}) \rightarrow \text{Cl}_2$                                                            | $k_{\text{exb}}(01, \text{ind\_Cl2})$                 | see general notes*                         |
| H6200f_a01 | TrAa01MblScScmCl | $\text{HCl} \rightarrow \text{HCl}(\text{aq})$                                                              | $k_{\text{exf}}(01, \text{ind\_HCl})$                 | see general notes*                         |
| H6200b_a01 | TrAa01MblScScmCl | $\text{HCl}(\text{aq}) \rightarrow \text{HCl}$                                                              | $k_{\text{exb}}(01, \text{ind\_HCl})$                 | see general notes*                         |
| H6201f_a01 | TrAa01MblScCl    | $\text{HOCl} \rightarrow \text{HOCl}(\text{aq})$                                                            | $k_{\text{exf}}(01, \text{ind\_HOCl})$                | see general notes*                         |
| H6201b_a01 | TrAa01MblScCl    | $\text{HOCl}(\text{aq}) \rightarrow \text{HOCl}$                                                            | $k_{\text{exb}}(01, \text{ind\_HOCl})$                | see general notes*                         |
| H6300_a01  | TrAa01MblClN     | $\text{N}_2\text{O}_5 + \text{Cl}^-(\text{aq}) \rightarrow \text{ClNO}_2 + \text{NO}_3^-(\text{aq})$        | $k_{\text{exf\_N205}}(01) * 5.E2$                     | Behnke et al. (1994), Behnke et al. (1997) |
| H6301_a01  | TrAa01MblClN     | $\text{ClNO}_3 \rightarrow \text{HOCl}(\text{aq}) + \text{HNO}_3(\text{aq})$                                | $k_{\text{exf\_ClN03}}(01) * C(\text{ind\_H20\_a01})$ | see general notes*                         |
| H6302_a01  | TrAa01MblClN     | $\text{ClNO}_3 + \text{Cl}^-(\text{aq}) \rightarrow \text{Cl}_2(\text{aq}) + \text{NO}_3^-(\text{aq})$      | $k_{\text{exf\_ClN03}}(01) * 5.E2$                    | see general notes*                         |
| H7000f_a01 | TrAa01MblScBr    | $\text{Br}_2 \rightarrow \text{Br}_2(\text{aq})$                                                            | $k_{\text{exf}}(01, \text{ind\_Br2})$                 | see general notes*                         |
| H7000b_a01 | TrAa01MblScBr    | $\text{Br}_2(\text{aq}) \rightarrow \text{Br}_2$                                                            | $k_{\text{exb}}(01, \text{ind\_Br2})$                 | see general notes*                         |
| H7200f_a01 | TrAa01MblScScmBr | $\text{HBr} \rightarrow \text{HBr}(\text{aq})$                                                              | $k_{\text{exf}}(01, \text{ind\_HBr})$                 | see general notes*                         |
| H7200b_a01 | TrAa01MblScScmBr | $\text{HBr}(\text{aq}) \rightarrow \text{HBr}$                                                              | $k_{\text{exb}}(01, \text{ind\_HBr})$                 | see general notes*                         |
| H7201f_a01 | TrAa01MblScBr    | $\text{HOBr} \rightarrow \text{HOBr}(\text{aq})$                                                            | $k_{\text{exf}}(01, \text{ind\_HOBr})$                | see general notes*                         |
| H7201b_a01 | TrAa01MblScBr    | $\text{HOBr}(\text{aq}) \rightarrow \text{HOBr}$                                                            | $k_{\text{exb}}(01, \text{ind\_HOBr})$                | see general notes*                         |
| H7300_a01  | TrAa01MblBrN     | $\text{N}_2\text{O}_5 + \text{Br}^-(\text{aq}) \rightarrow \text{BrNO}_2 + \text{NO}_3^-(\text{aq})$        | $k_{\text{exf\_N205}}(01) * 3.E5$                     | Behnke et al. (1994), Behnke et al. (1997) |
| H7301_a01  | TrAa01MblBrN     | $\text{BrNO}_3 \rightarrow \text{HOBr}(\text{aq}) + \text{HNO}_3(\text{aq})$                                | $k_{\text{exf\_BrN03}}(01) * C(\text{ind\_H20\_a01})$ | see general notes*                         |
| H7302_a01  | TrAa01MblBrN     | $\text{BrNO}_3 + \text{Br}^-(\text{aq}) \rightarrow \text{Br}_2(\text{aq}) + \text{NO}_3^-(\text{aq})$      | $k_{\text{exf\_BrN03}}(01) * 3.E5$                    | see general notes*                         |
| H7600f_a01 | TrAa01MblScBrCl  | $\text{BrCl} \rightarrow \text{BrCl}(\text{aq})$                                                            | $k_{\text{exf}}(01, \text{ind\_BrCl})$                | see general notes*                         |
| H7600b_a01 | TrAa01MblScBrCl  | $\text{BrCl}(\text{aq}) \rightarrow \text{BrCl}$                                                            | $k_{\text{exb}}(01, \text{ind\_BrCl})$                | see general notes*                         |
| H7601_a01  | TrAa01MblBrClN   | $\text{ClNO}_3 + \text{Br}^-(\text{aq}) \rightarrow \text{BrCl}(\text{aq}) + \text{NO}_3^-(\text{aq})$      | $k_{\text{exf\_ClN03}}(01) * 3.E5$                    | see general notes*                         |
| H7602_a01  | TrAa01MblBrClN   | $\text{BrNO}_3 + \text{Cl}^-(\text{aq}) \rightarrow \text{BrCl}(\text{aq}) + \text{NO}_3^-(\text{aq})$      | $k_{\text{exf\_BrN03}}(01) * 5.E2$                    | see general notes*                         |
| H8000f_a01 | TrAa01ScI        | $\text{I}_2 \rightarrow \text{I}_2(\text{aq})$                                                              | $k_{\text{exf}}(01, \text{ind\_I2})$                  | see general notes*                         |
| H8000b_a01 | TrAa01ScI        | $\text{I}_2(\text{aq}) \rightarrow \text{I}_2$                                                              | $k_{\text{exb}}(01, \text{ind\_I2})$                  | see general notes*                         |
| H8100f_a01 | TrAa01MblScI     | $\text{IO} \rightarrow \text{IO}(\text{aq})$                                                                | $k_{\text{exf}}(01, \text{ind\_IO})$                  | see general notes*                         |
| H8100b_a01 | TrAa01MblScI     | $\text{IO}(\text{aq}) \rightarrow \text{IO}$                                                                | $k_{\text{exb}}(01, \text{ind\_IO})$                  | see general notes*                         |
| H8101_a01  | TrAa01I          | $\text{OIO} \rightarrow \text{HOI}(\text{aq}) + \text{HO}_2(\text{aq})$                                     | $k_{\text{exf}}(01, \text{ind\_OIO})$                 | see general notes*                         |
| H8102_a01  | TrAa01I          | $\text{I}_2\text{O}_2 \rightarrow \text{HOI}(\text{aq}) + \text{H}^+(\text{aq}) + \text{IO}_2^-(\text{aq})$ | $k_{\text{exf}}(01, \text{ind\_I2O2})$                | see general notes*                         |
| H8200f_a01 | TrAa01MblScI     | $\text{HOI} \rightarrow \text{HOI}(\text{aq})$                                                              | $k_{\text{exf}}(01, \text{ind\_HOI})$                 | see general notes*                         |
| H8200b_a01 | TrAa01MblScI     | $\text{HOI}(\text{aq}) \rightarrow \text{HOI}$                                                              | $k_{\text{exb}}(01, \text{ind\_HOI})$                 | see general notes*                         |
| H8201_a01  | TrAa01MblScI     | $\text{HI} \rightarrow \text{H}^+(\text{aq}) + \text{I}^-(\text{aq})$                                       | $k_{\text{mt}}(\text{HI}) \cdot lwc$                  | see general notes*                         |

Table 5: Reversible (Henry’s law) equilibria and irreversible (“heterogenous”) uptake

| #           | labels          | reaction                                                                                                 | rate coefficient                                    | reference          |
|-------------|-----------------|----------------------------------------------------------------------------------------------------------|-----------------------------------------------------|--------------------|
| H8202_a01   | TrAa01ScI       | $\text{HIO}_3 \rightarrow \text{IO}_3^-(\text{aq}) + \text{H}^+(\text{aq})$                              | $k_{\text{mt}}(\text{HIO}_3) \cdot lwc$             | see general notes* |
| H8300_a01   | TrAa01IN        | $\text{INO}_2 \rightarrow \text{HOI}(\text{aq}) + \text{HONO}(\text{aq})$                                | $k_{\text{exf}}(01, \text{ind\_INO2})$              | see general notes* |
| H8301_a01   | TrAa01MblIN     | $\text{INO}_3 \rightarrow \text{HOI}(\text{aq}) + \text{HNO}_3(\text{aq})$                               | $k_{\text{exf}}(01, \text{ind\_INO3})$              | see general notes* |
| H8600f_a01  | TrAa01MblScClI  | $\text{ICl} \rightarrow \text{ICl}(\text{aq})$                                                           | $k_{\text{exf}}(01, \text{ind\_ICl})$               | see general notes* |
| H8600b_a01  | TrAa01MblScClI  | $\text{ICl}(\text{aq}) \rightarrow \text{ICl}$                                                           | $k_{\text{exb}}(01, \text{ind\_ICl})$               | see general notes* |
| H8700f_a01  | TrAa01MblScBrI  | $\text{IBr} \rightarrow \text{IBr}(\text{aq})$                                                           | $k_{\text{exf}}(01, \text{ind\_IBr})$               | see general notes* |
| H8700b_a01  | TrAa01MblScBrI  | $\text{IBr}(\text{aq}) \rightarrow \text{IBr}$                                                           | $k_{\text{exb}}(01, \text{ind\_IBr})$               | see general notes* |
| H9100f_a01  | TrAa01MblScScmS | $\text{SO}_2 \rightarrow \text{SO}_2(\text{aq})$                                                         | $k_{\text{exf}}(01, \text{ind\_SO2})$               | see general notes* |
| H9100b_a01  | TrAa01MblScScmS | $\text{SO}_2(\text{aq}) \rightarrow \text{SO}_2$                                                         | $k_{\text{exb}}(01, \text{ind\_SO2})$               | see general notes* |
| H9200_a01   | TrAa01MblScScmS | $\text{H}_2\text{SO}_4 \rightarrow \text{H}_2\text{SO}_4(\text{aq})$                                     | $xnom7sulf * k_{\text{exf}}(01, \text{ind\_H2SO4})$ | see general notes* |
| H9400f_a01  | TrAa01CS        | $\text{DMSO} \rightarrow \text{DMSO}(\text{aq})$                                                         | $k_{\text{exf}}(01, \text{ind\_DMSO})$              | see general notes* |
| H9400b_a01  | TrAa01CS        | $\text{DMSO}(\text{aq}) \rightarrow \text{DMSO}$                                                         | $k_{\text{exb}}(01, \text{ind\_DMSO})$              | see general notes* |
| H9401_a01   | TrAa01MblS      | $\text{CH}_3\text{SO}_3\text{H} \rightarrow \text{CH}_3\text{SO}_3^-(\text{aq}) + \text{H}^+(\text{aq})$ | $k_{\text{exf}}(01, \text{ind\_CH3SO3H})$           | see general notes* |
| H9402f_a01  | TrAa01CS        | $\text{DMS} \rightarrow \text{DMS}(\text{aq})$                                                           | $k_{\text{exf}}(01, \text{ind\_DMS})$               | see general notes* |
| H9402b_a01  | TrAa01CS        | $\text{DMS}(\text{aq}) \rightarrow \text{DMS}$                                                           | $k_{\text{exb}}(01, \text{ind\_DMS})$               | see general notes* |
| H10000f_a01 | TrAa01Hg        | $\text{Hg} \rightarrow \text{Hg}(\text{aq})$                                                             | $k_{\text{exf}}(01, \text{ind\_Hg})$                | see general notes* |
| H10000b_a01 | TrAa01Hg        | $\text{Hg}(\text{aq}) \rightarrow \text{Hg}$                                                             | $k_{\text{exb}}(01, \text{ind\_Hg})$                | see general notes* |
| H10100f_a01 | TrAa01Hg        | $\text{HgO} \rightarrow \text{HgO}(\text{aq})$                                                           | $k_{\text{exf}}(01, \text{ind\_HgO})$               | see general notes* |
| H10100b_a01 | TrAa01Hg        | $\text{HgO}(\text{aq}) \rightarrow \text{HgO}$                                                           | $k_{\text{exb}}(01, \text{ind\_HgO})$               | see general notes* |
| H10600f_a01 | TrAa01ClHg      | $\text{HgCl}_2 \rightarrow \text{HgCl}_2(\text{aq})$                                                     | $k_{\text{exf}}(01, \text{ind\_HgCl2})$             | see general notes* |
| H10600b_a01 | TrAa01ClHg      | $\text{HgCl}_2(\text{aq}) \rightarrow \text{HgCl}_2$                                                     | $k_{\text{exb}}(01, \text{ind\_HgCl2})$             | see general notes* |
| H10700f_a01 | TrAa01BrHg      | $\text{HgBr}_2 \rightarrow \text{HgBr}_2(\text{aq})$                                                     | $k_{\text{exf}}(01, \text{ind\_HgBr2})$             | see general notes* |
| H10700b_a01 | TrAa01BrHg      | $\text{HgBr}_2(\text{aq}) \rightarrow \text{HgBr}_2$                                                     | $k_{\text{exb}}(01, \text{ind\_HgBr2})$             | see general notes* |
| H10701f_a01 | TrAa01BrClHg    | $\text{ClHgBr} \rightarrow \text{ClHgBr}(\text{aq})$                                                     | $k_{\text{exf}}(01, \text{ind\_ClHgBr})$            | see general notes* |
| H10701b_a01 | TrAa01BrClHg    | $\text{ClHgBr}(\text{aq}) \rightarrow \text{ClHgBr}$                                                     | $k_{\text{exb}}(01, \text{ind\_ClHgBr})$            | see general notes* |
| H10702f_a01 | TrAa01BrHg      | $\text{BrHgOBr} \rightarrow \text{BrHgOBr}(\text{aq})$                                                   | $k_{\text{exf}}(01, \text{ind\_BrHgOBr})$           | see general notes* |
| H10702b_a01 | TrAa01BrHg      | $\text{BrHgOBr}(\text{aq}) \rightarrow \text{BrHgOBr}$                                                   | $k_{\text{exb}}(01, \text{ind\_BrHgOBr})$           | see general notes* |
| H10703f_a01 | TrAa01BrClHg    | $\text{ClHgOBr} \rightarrow \text{ClHgOBr}(\text{aq})$                                                   | $k_{\text{exf}}(01, \text{ind\_ClHgOBr})$           | see general notes* |
| H10703b_a01 | TrAa01BrClHg    | $\text{ClHgOBr}(\text{aq}) \rightarrow \text{ClHgOBr}$                                                   | $k_{\text{exb}}(01, \text{ind\_ClHgOBr})$           | see general notes* |

## General notes

The forward ( $k_{\text{exf}}$ ) and backward ( $k_{\text{exb}}$ ) rate coefficients are calculated in the file `messy_mecca_aero.f90`

using the accommodation coefficients in subroutine `mecca_aero_alpha` and Henry’s law constants in subroutine `mecca_aero_henry`.

For uptake of X (X =  $\text{N}_2\text{O}_5$ ,  $\text{ClNO}_3$ , or  $\text{BrNO}_3$ ) and subsequent reaction with  $\text{H}_2\text{O}$ ,  $\text{Cl}^-$ , and  $\text{Br}^-$  in H3201, H6300, H6301, H6302, H7300, H7301, H7302, H7601,

and H7602, we define:

$$k_{\text{exf}}(\text{X}) = \frac{k_{\text{mt}}(\text{X}) \times \text{LWC}}{[\text{H}_2\text{O}] + 5 \times 10^2 [\text{Cl}^-] + 3 \times 10^5 [\text{Br}^-]}$$

Here,  $k_{\text{mt}}$  = mass transfer coefficient, and LWC = liquid water content of the aerosol. The total uptake rate

of X is only determined by  $k_{\text{mt}}$ . The factors only affect the branching between hydrolysis and the halide reactions. The factor  $5 \times 10^2$  was chosen such that the chloride reaction dominates over hydrolysis at about  $[\text{Cl}^-] > 0.1 \text{ M}$  (see Fig. 3 in Behnke et al. (1997)), i.e. when the ratio  $[\text{H}_2\text{O}]/[\text{Cl}^-]$  is less than  $5 \times 10^2$ . The ratio

$5 \times 10^2 / 3 \times 10^5$  was chosen such that the reactions with chloride and bromide are roughly equal for sea water composition (Behnke et al., 1994). These ratios were measured for uptake of  $\text{N}_2\text{O}_5$ . Here, they are also used for  $\text{ClNO}_3$  and  $\text{BrNO}_3$ .

Table 6: Heterogeneous reactions

| #       | labels        | reaction                                                                                | rate coefficient                                 | reference          |
|---------|---------------|-----------------------------------------------------------------------------------------|--------------------------------------------------|--------------------|
| HET200  | StHetN        | $\text{N}_2\text{O}_5 + \text{H}_2\text{O} \rightarrow 2 \text{HNO}_3$                  | <code>khet_St(ihs_N205_H2O)</code>               | see general notes* |
| HET201  | TrHetN        | $\text{N}_2\text{O}_5 \rightarrow 2 \text{NO}_3^-(\text{aq}) + 2 \text{H}^+(\text{aq})$ | <code>khet_Tr(iht_N205)</code>                   | see general notes* |
| HET410  | StHetCl       | $\text{HOCl} + \text{HCl} \rightarrow \text{Cl}_2 + \text{H}_2\text{O}$                 | <code>khet_St(ihs_HOCl_HCl)</code>               | see general notes* |
| HET420  | StHetClN      | $\text{ClNO}_3 + \text{HCl} \rightarrow \text{Cl}_2 + \text{HNO}_3$                     | <code>khet_St(ihs_ClNO3_HCl)</code>              | see general notes* |
| HET421  | StHetClN      | $\text{ClNO}_3 + \text{H}_2\text{O} \rightarrow \text{HOCl} + \text{HNO}_3$             | <code>khet_St(ihs_ClNO3_H2O)</code>              | see general notes* |
| HET422  | StHetClN      | $\text{N}_2\text{O}_5 + \text{HCl} \rightarrow \text{ClNO}_2 + \text{HNO}_3$            | <code>khet_St(ihs_N205_HCl)</code>               | see general notes* |
| HET510  | StHetBr       | $\text{HOBr} + \text{HBr} \rightarrow \text{Br}_2 + \text{H}_2\text{O}$                 | <code>khet_St(ihs_HOBr_HBr)</code>               | see general notes* |
| HET520  | StHetBrN      | $\text{BrNO}_3 + \text{H}_2\text{O} \rightarrow \text{HOBr} + \text{HNO}_3$             | <code>khet_St(ihs_BrNO3_H2O)</code>              | see general notes* |
| HET540  | StHetBrClN    | $\text{ClNO}_3 + \text{HBr} \rightarrow \text{BrCl} + \text{HNO}_3$                     | <code>khet_St(ihs_ClNO3_HBr)</code>              | see general notes* |
| HET541  | StHetBrClN    | $\text{BrNO}_3 + \text{HCl} \rightarrow \text{BrCl} + \text{HNO}_3$                     | <code>khet_St(ihs_BrNO3_HCl)</code>              | see general notes* |
| HET542  | StHetBrCl     | $\text{HOCl} + \text{HBr} \rightarrow \text{BrCl} + \text{H}_2\text{O}$                 | <code>khet_St(ihs_HOCl_HBr)</code>               | see general notes* |
| HET543  | StHetBrCl     | $\text{HOBr} + \text{HCl} \rightarrow \text{BrCl} + \text{H}_2\text{O}$                 | <code>khet_St(ihs_HOBr_HCl)</code>               | see general notes* |
| HET1001 | StTrHetHg     | $\text{Hg} \rightarrow \text{Hg}(\text{aq})$                                            | <code>khet_Tr(iht_Hg) + khet_St(ihs_Hg)</code>   | see general notes* |
| HET1002 | StTrHetHg     | $\text{HgO} \rightarrow \text{Hg}(\text{aq})$                                           | <code>khet_Tr(iht_RGM) + khet_St(ihs_RGM)</code> | see general notes* |
| HET1003 | StTrHetClHg   | $\text{HgCl} \rightarrow \text{Hg}(\text{aq}) + \text{LCHLORINE}$                       | <code>khet_Tr(iht_RGM) + khet_St(ihs_RGM)</code> | see general notes* |
| HET1004 | StTrHetClHg   | $\text{HgCl}_2 \rightarrow \text{Hg}(\text{aq}) + 2 \text{LCHLORINE}$                   | <code>khet_Tr(iht_RGM) + khet_St(ihs_RGM)</code> | see general notes* |
| HET1005 | StTrHetBrHg   | $\text{HgBr} \rightarrow \text{Hg}(\text{aq}) + \text{LBROMINE}$                        | <code>khet_Tr(iht_RGM) + khet_St(ihs_RGM)</code> | see general notes* |
| HET1006 | StTrHetBrHg   | $\text{HgBr}_2 \rightarrow \text{Hg}(\text{aq}) + 2 \text{LBROMINE}$                    | <code>khet_Tr(iht_RGM) + khet_St(ihs_RGM)</code> | see general notes* |
| HET1007 | StTrHetBrClHg | $\text{ClHgBr} \rightarrow \text{Hg}(\text{aq}) + \text{LCHLORINE} + \text{LBROMINE}$   | <code>khet_Tr(iht_RGM) + khet_St(ihs_RGM)</code> | see general notes* |
| HET1008 | StTrHetBrHg   | $\text{BrHgOBr} \rightarrow \text{Hg}(\text{aq}) + 2 \text{LBROMINE}$                   | <code>khet_Tr(iht_RGM) + khet_St(ihs_RGM)</code> | see general notes* |
| HET1009 | StTrHetBrClHg | $\text{ClHgOBr} \rightarrow \text{Hg}(\text{aq}) + \text{LCHLORINE} + \text{LBROMINE}$  | <code>khet_Tr(iht_RGM) + khet_St(ihs_RGM)</code> | see general notes* |

## General notes

Heterogeneous reaction rates are calculated with an external module (e.g., MECCA\_KHET) and then supplied to the MECCA chemistry (see [www.messy-interface.org](http://www.messy-interface.org) for details)



Table 7: Acid-base and other equilibria

| #         | labels           | reaction                                                                            | $K_0 [M^{m-n}]$ | $-\Delta H/R [K]$ | reference                           |
|-----------|------------------|-------------------------------------------------------------------------------------|-----------------|-------------------|-------------------------------------|
| EQ20_a01  | TrAa01Sc         | $\text{HO}_2 \rightleftharpoons \text{O}_2^- + \text{H}^+$                          | 1.6E-5          |                   | Weinstein-Lloyd and Schwartz (1991) |
| EQ21_a01  | TrAa01MblScScm   | $\text{H}_2\text{O} \rightleftharpoons \text{H}^+ + \text{OH}^-$                    | 1.0E-16         | -6716             | Chameides (1984)                    |
| EQ30_a01  | TrAa01MblScScmN  | $\text{NH}_4^+ \rightleftharpoons \text{H}^+ + \text{NH}_3$                         | 5.88E-10        | -2391             | Chameides (1984)                    |
| EQ31_a01  | TrAa01ScN        | $\text{HONO} \rightleftharpoons \text{H}^+ + \text{NO}_2^-$                         | 5.1E-4          | -1260             | Schwartz and White (1981)           |
| EQ32_a01  | TrAa01MblScScmN  | $\text{HNO}_3 \rightleftharpoons \text{H}^+ + \text{NO}_3^-$                        | 15              | 8700              | Davis and de Bruin (1964)           |
| EQ33_a01  | TrAa01ScN        | $\text{HNO}_4 \rightleftharpoons \text{NO}_4^- + \text{H}^+$                        | 1.E-5           |                   | Warneck (1999)                      |
| EQ40_a01  | TrAa01MblScScm   | $\text{CO}_2 \rightleftharpoons \text{H}^+ + \text{HCO}_3^-$                        | 4.3E-7          | -913              | Chameides (1984)*                   |
| EQ41_a01  | TrAa01ScScm      | $\text{HCOOH} \rightleftharpoons \text{H}^+ + \text{HCOO}^-$                        | 1.8E-4          |                   | Weast (1980)                        |
| EQ60_a01  | TrAa01Cl         | $\text{Cl}_2^- \rightleftharpoons \text{Cl} + \text{Cl}^-$                          | 7.3E-6          |                   | Yu (2004)                           |
| EQ61_a01  | TrAa01MblScScmCl | $\text{HCl} \rightleftharpoons \text{H}^+ + \text{Cl}^-$                            | 1.7E6           | 6896              | Marsh and McElroy (1985)            |
| EQ62_a01  | TrAa01ScCl       | $\text{HOCl} \rightleftharpoons \text{H}^+ + \text{ClO}^-$                          | 3.2E-8          |                   | Lax (1969)                          |
| EQ70_a01  | TrAa01Br         | $\text{Br}_2^- \rightleftharpoons \text{Br} + \text{Br}^-$                          | 2.54E-6         | -2256             | Liu et al. (2002)                   |
| EQ71_a01  | TrAa01MblScScmBr | $\text{HBr} \rightleftharpoons \text{H}^+ + \text{Br}^-$                            | 1.0E9           |                   | Lax (1969)                          |
| EQ72_a01  | TrAa01ScBr       | $\text{HOBr} \rightleftharpoons \text{H}^+ + \text{BrO}^-$                          | 2.3E-9          | -3091             | Kelley and Tartar (1956)*           |
| EQ73_a01  | TrAa01MblBrCl    | $\text{BrCl} + \text{Cl}^- \rightleftharpoons \text{BrCl}_2^-$                      | 3.8             | 1191              | Wang et al. (1994)                  |
| EQ74_a01  | TrAa01MblBrCl    | $\text{BrCl} + \text{Br}^- \rightleftharpoons \text{Br}_2\text{Cl}^-$               | 1.8E4           | 7457              | Wang et al. (1994)                  |
| EQ75_a01  | TrAa01MblBrCl    | $\text{Br}_2 + \text{Cl}^- \rightleftharpoons \text{Br}_2\text{Cl}^-$               | 1.3             | 0                 | Wang et al. (1994)                  |
| EQ76_a01  | TrAa01MblBrCl    | $\text{Br}^- + \text{Cl}_2 \rightleftharpoons \text{BrCl}_2^-$                      | 4.2E6           | 14072             | Wang et al. (1994)                  |
| EQ80_a01  | TrAa01MblScClI   | $\text{ICl} + \text{Cl}^- \rightleftharpoons \text{ICl}_2^-$                        | 7.7E1           |                   | Wang et al. (1989)                  |
| EQ81_a01  | TrAa01MblScBrI   | $\text{IBr} + \text{Br}^- \rightleftharpoons \text{IBr}_2^-$                        | 2.9E2           |                   | Troy and Margerum (1991)            |
| EQ82_a01  | TrAa01MblScBrClI | $\text{ICl} + \text{Br}^- \rightleftharpoons \text{IBr} + \text{Cl}^-$              | 3.3E2           |                   | see note*                           |
| EQ90_a01  | TrAa01MblScScmS  | $\text{SO}_2 \rightleftharpoons \text{H}^+ + \text{HSO}_3^-$                        | 1.7E-2          | 2090              | Chameides (1984)                    |
| EQ91_a01  | TrAa01MblScScmS  | $\text{HSO}_3^- \rightleftharpoons \text{H}^+ + \text{SO}_3^{2-}$                   | 6.0E-8          | 1120              | Chameides (1984)                    |
| EQ92_a01  | TrAa01MblScScmS  | $\text{HSO}_4^- \rightleftharpoons \text{H}^+ + \text{SO}_4^{2-}$                   | 1.2E-2          | 2720              | Seinfeld and Pandis (1998)          |
| EQ93_a01  | TrAa01MblScScmS  | $\text{H}_2\text{SO}_4 \rightleftharpoons \text{H}^+ + \text{HSO}_4^-$              | 1.0E3           |                   | Seinfeld and Pandis (1998)          |
| EQ100_a01 | TrAa01Hg         | $\text{Hg}^{2+} + \text{OH}^- \rightleftharpoons \text{HgOH}^+$                     | 4.0E10          |                   | Ammann and Pöschl (2007)            |
| EQ101_a01 | TrAa01Hg         | $\text{HgOH}^+ + \text{OH}^- \rightleftharpoons \text{Hg}(\text{OH})_2$             | 1.58E11         |                   | Ammann and Pöschl (2007)            |
| EQ102_a01 | TrAa01ClHg       | $\text{Hg}^{2+} + \text{Cl}^- \rightleftharpoons \text{HgCl}^+$                     | 5.8E6           |                   | Ammann and Pöschl (2007)            |
| EQ103_a01 | TrAa01ClHg       | $\text{HgCl}^+ + \text{Cl}^- \rightleftharpoons \text{HgCl}_2$                      | 2.5E6           |                   | Ammann and Pöschl (2007)            |
| EQ104_a01 | TrAa01ClHg       | $\text{HgOH}^+ + \text{Cl}^- \rightleftharpoons \text{Hg}(\text{OH})\text{Cl}$      | 2.69E7          |                   | Ammann and Pöschl (2007)            |
| EQ105_a01 | TrAa01BrHg       | $\text{Hg}^{2+} + \text{Br}^- \rightleftharpoons \text{HgBr}^+$                     | 1.1E9           |                   | Raofie and Ariya (2004)             |
| EQ106_a01 | TrAa01BrHg       | $\text{HgBr}^+ + \text{Br}^- \rightleftharpoons \text{HgBr}_2$                      | 2.5E8           |                   | Raofie and Ariya (2004)             |
| EQ107_a01 | TrAa01HgS        | $\text{Hg}^{2+} + \text{SO}_3^{2-} \rightleftharpoons \text{HgSO}_3$                | 2.E13           |                   | van Loon et al. (2001)              |
| EQ108_a01 | TrAa01HgS        | $\text{HgSO}_3 + \text{SO}_3^{2-} \rightleftharpoons \text{Hg}(\text{SO}_3)_2^{2-}$ | 1.E10           |                   | van Loon et al. (2001)              |

## Specific notes

EQ40\_a01: For  $pK_a(\text{CO}_2)$ , see also Dickson and Millero (1987).

EQ72\_a01: For  $pK_a(\text{HOBr})$ , see also Keller-Rudek et al. (1992).

EQ82\_a01: Thermodynamic calculations on the IBr/ICl equilibrium according to the data tables from Wagman et al. (1982):

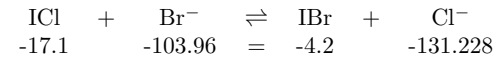

$$\frac{\Delta G}{[\text{kJ/mol}]} = -4.2 - 131.228 - (-17.1 - 103.96) = -14.368$$

$$K = \frac{[\text{IBr}] \times [\text{Cl}^-]}{[\text{ICl}] \times [\text{Br}^-]} = \exp\left(\frac{-\Delta G}{RT}\right) = \exp\left(\frac{14368}{8.314 \times 298}\right) = 330$$

This means we have equal amounts of IBr and ICl when the  $[\text{Cl}^-]/[\text{Br}^-]$  ratio equals 330.

Table 8: Aqueous phase reactions

| #          | labels    | reaction                                       | $k_0 [M^{1-n} s^{-1}]$ | $-E_a/R[K]$ | reference                       |
|------------|-----------|------------------------------------------------|------------------------|-------------|---------------------------------|
| A1000_a01  | TrAa01Sc  | $O_3 + O_2^- \rightarrow OH + OH^-$            | 1.5E9                  |             | Sehested et al. (1983)          |
| A2100_a01  | TrAa01Sc  | $OH + O_2^- \rightarrow OH^-$                  | 1.0E10                 |             | Sehested et al. (1968)          |
| A2101_a01  | TrAa01Sc  | $OH + OH \rightarrow H_2O_2$                   | 5.5E9                  |             | Buxton et al. (1988)            |
| A2102_a01  | TrAa01Sc  | $HO_2 + O_2^- \rightarrow H_2O_2 + OH^-$       | 1.0E8                  | -900        | Christensen and Sehested (1988) |
| A2103_a01  | TrAa01Sc  | $HO_2 + OH \rightarrow H_2O$                   | 7.1E9                  |             | Sehested et al. (1968)          |
| A2104_a01  | TrAa01Sc  | $HO_2 + HO_2 \rightarrow H_2O_2$               | 9.7E5                  | -2500       | Christensen and Sehested (1988) |
| A2105_a01  | TrAa01Sc  | $H_2O_2 + OH \rightarrow HO_2$                 | 2.7E7                  | -1684       | Christensen et al. (1982)       |
| A3100_a01  | TrAa01ScN | $NO_2^- + O_3 \rightarrow NO_3^-$              | 5.0E5                  | -6950       | Damschen and Martin (1983)      |
| A3101_a01  | TrAa01ScN | $NO_2 + NO_2 \rightarrow HNO_3 + HONO$         | 1.0E8                  |             | Lee and Schwartz (1981)         |
| A3102_a01  | TrAa01ScN | $NO_4^- \rightarrow NO_2^-$                    | 8.0E1                  |             | Warneck (1999)                  |
| A3200_a01  | TrAa01ScN | $NO_2 + HO_2 \rightarrow HNO_4$                | 1.8E9                  |             | Warneck (1999)                  |
| A3201_a01  | TrAa01ScN | $NO_2^- + OH \rightarrow NO_2 + OH^-$          | 1.0E10                 |             | Wingenter et al. (1999)         |
| A3202_a01  | TrAa01ScN | $NO_3 + OH^- \rightarrow NO_3^- + OH$          | 8.2E7                  | -2700       | Exner et al. (1992)             |
| A3203_a01  | TrAa01ScN | $HONO + OH \rightarrow NO_2$                   | 1.0E10                 |             | Barker et al. (1970)            |
| A3204_a01  | TrAa01ScN | $HONO + H_2O_2 + H^+ \rightarrow HNO_3 + H^+$  | 4.6E3                  | -6800       | Damschen and Martin (1983)      |
| A4100_a01  | TrAa01Sc  | $CO_3^- + O_2^- \rightarrow HCO_3^- + OH^-$    | 6.5E8                  |             | Ross et al. (1992)              |
| A4101_a01  | TrAa01Sc  | $CO_3^- + H_2O_2 \rightarrow HCO_3^- + HO_2$   | 4.3E5                  |             | Ross et al. (1992)              |
| A4102_a01  | TrAa01Sc  | $HCOO^- + CO_3^- \rightarrow 2 HCO_3^- + HO_2$ | 1.5E5                  |             | Ross et al. (1992)              |
| A4103_a01  | TrAa01Sc  | $HCOO^- + OH \rightarrow OH^- + HO_2 + CO_2$   | 3.1E9                  | -1240       | Chin and Wine (1994)            |
| A4104_a01  | TrAa01Sc  | $HCO_3^- + OH \rightarrow CO_3^-$              | 8.5E6                  |             | Ross et al. (1992)              |
| A4105_a01  | TrAa01Sc  | $HCHO + OH \rightarrow HCOOH + HO_2$           | 7.7E8                  | -1020       | Chin and Wine (1994)            |
| A4106_a01  | TrAa01Sc  | $HCOOH + OH \rightarrow HO_2 + CO_2$           | 1.1E8                  | -991        | Chin and Wine (1994)            |
| A4107_a01  | TrAa01Sc  | $CH_3OO + O_2^- \rightarrow CH_3OOH + OH^-$    | 5.0E7                  |             | Jacob (1986)                    |
| A4108_a01  | TrAa01Sc  | $CH_3OO + HO_2 \rightarrow CH_3OOH$            | 4.3E5                  |             | Jacob (1986)                    |
| A4109_a01  | TrAa01Sc  | $CH_3OH + OH \rightarrow HCHO + HO_2$          | 9.7E8                  |             | Buxton et al. (1988)            |
| A4110a_a01 | TrAa01Sc  | $CH_3OOH + OH \rightarrow CH_3OO$              | 2.7E7                  | -1715       | Jacob (1986)                    |
| A4110b_a01 | TrAa01Sc  | $CH_3OOH + OH \rightarrow HCHO + OH$           | 1.1E7                  | -1715       | Jacob (1986)                    |
| A6000_a01  | TrAa01Cl  | $Cl + Cl \rightarrow Cl_2$                     | 8.8E7                  |             | Wu et al. (1980)                |
| A6001_a01  | TrAa01Cl  | $Cl_2 + Cl_2^- \rightarrow Cl_2 + 2 Cl^-$      | 3.5E9                  |             | Yu (2004)                       |
| A6100_a01  | TrAa01Cl  | $Cl^- + O_3 \rightarrow ClO^-$                 | 3.0E-3                 |             | Hoigné et al. (1985)            |
| A6101_a01  | TrAa01Cl  | $Cl_2 + O_2^- \rightarrow Cl_2^-$              | 1.0E9                  |             | Bjergbakke et al. (1981)        |
| A6102_a01  | TrAa01Cl  | $Cl_2^- + O_2^- \rightarrow 2 Cl^-$            | 1.0E9                  |             | Jacobi (1996)*                  |
| A6200_a01  | TrAa01Cl  | $Cl \rightarrow H^+ + ClOH^-$                  | 1.8E5                  |             | Yu (2004)                       |
| A6201_a01  | TrAa01Cl  | $Cl + H_2O_2 \rightarrow HO_2 + Cl^- + H^+$    | 2.7E7                  | -1684       | Christensen et al. (1982)       |

Table 8: Aqueous phase reactions (...continued)

| #          | labels        | reaction                                             | $k_0 [M^{1-n} s^{-1}]$ | $-E_a/R[K]$ | reference                     |
|------------|---------------|------------------------------------------------------|------------------------|-------------|-------------------------------|
| A6202_a01  | TrAa01Cl      | $Cl^- + OH^- \rightarrow ClOH^-$                     | 4.2E9                  |             | Yu (2004)                     |
| A6203_a01  | TrAa01Cl      | $Cl_2 + HO_2 \rightarrow Cl_2^- + H^+$               | 1.0E9                  |             | Bjergbakke et al. (1981)      |
| A6204_a01  | TrAa01MblCl   | $Cl_2 \rightarrow Cl^- + HOCl + H^+$                 | 21.8                   | -8012       | Wang and Margerum (1994)      |
| A6205_a01  | TrAa01Cl      | $Cl_2^- + HO_2 \rightarrow 2 Cl^- + H^+$             | 1.3E10                 |             | Jacobi (1996)                 |
| A6206_a01  | TrAa01Cl      | $HOCl + O_2^- \rightarrow Cl + OH^-$                 | 7.5E6                  |             | Long and Bielski (1980)       |
| A6207_a01  | TrAa01Cl      | $HOCl + HO_2 \rightarrow Cl$                         | 7.5E6                  |             | Long and Bielski (1980)       |
| A6208_a01  | TrAa01MblCl   | $HOCl + Cl^- + H^+ \rightarrow Cl_2$                 | 2.2E4                  | -3508       | Wang and Margerum (1994)      |
| A6209_a01  | TrAa01Cl      | $ClOH^- \rightarrow Cl^- + OH^-$                     | 6.0E9                  |             | Yu (2004)                     |
| A6210_a01  | TrAa01Cl      | $ClOH^- + H^+ \rightarrow Cl$                        | 2.4E10                 |             | Yu (2004)                     |
| A6300_a01  | TrAa01ClN     | $Cl + NO_3^- \rightarrow NO_3 + Cl^-$                | 1.0E8                  |             | Buxton et al. (1999b)         |
| A6301_a01  | TrAa01ClN     | $Cl^- + NO_3 \rightarrow NO_3^- + Cl$                | 3.4E8                  |             | Buxton et al. (1999b)*        |
| A6302_a01  | TrAa01ClN     | $Cl_2^- + NO_2^- \rightarrow 2 Cl^- + NO_2$          | 6.0E7                  |             | Jacobi et al. (1996)          |
| A6400_a01  | TrAa01Cl      | $Cl_2^- + CH_3OOH \rightarrow 2 Cl^- + H^+ + CH_3OO$ | 5.0E4                  |             | Jacobi et al. (1996)          |
| A7000_a01  | TrAa01Br      | $Br_2^- + Br_2^- \rightarrow 2 Br^- + Br_2$          | 1.9E9                  |             | Ross et al. (1992)            |
| A7100_a01  | TrAa01Br      | $Br^- + O_3 \rightarrow BrO^-$                       | 2.1E2                  | -4450       | Haag and Hoigné (1983)        |
| A7101_a01  | TrAa01Br      | $Br_2 + O_2^- \rightarrow Br_2^-$                    | 5.6E9                  |             | Sutton and Downes (1972)      |
| A7102_a01  | TrAa01Br      | $Br_2^- + O_2^- \rightarrow 2 Br^-$                  | 1.7E8                  |             | Wagner and Strehlow (1987)    |
| A7200_a01  | TrAa01Br      | $Br^- + OH^- \rightarrow BrOH^-$                     | 1.1E10                 |             | Zehavi and Rabani (1972)      |
| A7201_a01  | TrAa01Br      | $Br_2 + HO_2 \rightarrow Br_2^- + H^+$               | 1.1E8                  |             | Sutton and Downes (1972)      |
| A7202_a01  | TrAa01MblBr   | $Br_2 \rightarrow Br^- + HOBr + H^+$                 | 9.7E1                  | -7457       | Beckwith et al. (1996)        |
| A7203_a01  | TrAa01Br      | $Br_2^- + HO_2 \rightarrow Br_2 + H_2O_2 + OH^-$     | 4.4E9                  |             | Matthew et al. (2003)         |
| A7204_a01  | TrAa01Br      | $Br_2^- + H_2O_2 \rightarrow 2 Br^- + H^+ + HO_2$    | 1.0E5                  |             | Jacobi (1996)                 |
| A7205_a01  | TrAa01Br      | $HOBr + O_2^- \rightarrow Br + OH^-$                 | 3.5E9                  |             | Schwarz and Bielski (1986)    |
| A7206_a01  | TrAa01Br      | $HOBr + HO_2 \rightarrow Br$                         | 1.0E9                  |             | Herrmann et al. (1999)        |
| A7207_a01  | TrAa01Br      | $HOBr + H_2O_2 \rightarrow Br^- + H^+$               | 1.2E6                  |             | Bichsel and von Gunten (1999) |
| A7208_a01  | TrAa01MblBr   | $HOBr + Br^- + H^+ \rightarrow Br_2$                 | 1.6E10                 |             | Beckwith et al. (1996)        |
| A7209a_a01 | TrAa01Br      | $BrOH^- \rightarrow Br^- + OH^-$                     | 3.3E7                  |             | Zehavi and Rabani (1972)      |
| A7209b_a01 | TrAa01Br      | $BrOH^- \rightarrow Br + OH^-$                       | 4.2E6                  |             | Zehavi and Rabani (1972)      |
| A7210_a01  | TrAa01Br      | $BrOH^- + H^+ \rightarrow Br$                        | 4.4E10                 |             | Zehavi and Rabani (1972)      |
| A7300_a01  | TrAa01BrN     | $Br^- + NO_3 \rightarrow Br + NO_3^-$                | 4.0E9                  |             | Neta and Huie (1986)          |
| A7301_a01  | TrAa01BrN     | $Br_2^- + NO_2^- \rightarrow 2 Br^- + NO_2$          | 1.7E7                  | -1720       | Shoute et al. (1991)          |
| A7400_a01  | TrAa01Br      | $Br_2^- + CH_3OOH \rightarrow 2 Br^- + H^+ + CH_3OO$ | 1.0E5                  |             | Jacobi (1996)*                |
| A7601_a01  | TrAa01BrCl    | $Br^- + ClO^- + H^+ \rightarrow BrCl + OH^-$         | 3.7E10                 |             | Kumar and Margerum (1987)     |
| A7602_a01  | TrAa01MblBrCl | $Br^- + HOCl + H^+ \rightarrow BrCl$                 | 1.32E6                 |             | Kumar and Margerum (1987)     |

Table 8: Aqueous phase reactions (...continued)

| #         | labels          | reaction                                                                                                                                           | $k_0 [M^{1-n} s^{-1}]$ | $-E_a/R[K]$ | reference                                         |
|-----------|-----------------|----------------------------------------------------------------------------------------------------------------------------------------------------|------------------------|-------------|---------------------------------------------------|
| A7603_a01 | TrAa01MblBrCl   | $\text{HOBr} + \text{Cl}^- + \text{H}^+ \rightarrow \text{BrCl}$                                                                                   | 2.3E10                 |             | Liu and Margerum (2001)*                          |
| A7604_a01 | TrAa01MblBrCl   | $\text{BrCl} \rightarrow \text{Cl}^- + \text{HOBr} + \text{H}^+$                                                                                   | 3.0E6                  |             | Liu and Margerum (2001)                           |
| A8100_a01 | TrAa01MblI      | $\text{I}^- + \text{O}_3 \rightarrow \text{HOI} + \text{OH}^-$                                                                                     | 4.2E9                  | -9311       | Magi et al. (1997)                                |
| A8101_a01 | TrAa01MblI      | $\text{IO} + \text{IO} \rightarrow \text{HOI} + \text{IO}_2^- + \text{H}^+$                                                                        | 1.5E9                  |             | Buxton et al. (1986)                              |
| A8200_a01 | TrAa01MblI      | $\text{IO}_2^- + \text{H}_2\text{O}_2 \rightarrow \text{IO}_3^-$                                                                                   | 6.0E1                  |             | Furrow (1987)                                     |
| A8201_a01 | TrAa01I         | $\text{HOI} + \text{IO}_2^- \rightarrow \text{IO}_3^- + \text{I}^- + \text{H}^+$                                                                   | 6.0E2                  |             | Chinake and Simoyi (1996)                         |
| A8202_a01 | TrAa01MblI      | $\text{HOI} + \text{I}^- + \text{H}^+ \rightarrow \text{I}_2$                                                                                      | 4.4E12                 |             | Eigen and Kustin (1962)                           |
| A8203_a01 | TrAa01MblI      | $\text{IO}_2^- + \text{I}^- + \text{H}^+ \rightarrow 2 \text{HOI} + \text{OH}^-$                                                                   | 2.0E10                 |             | Edblom et al. (1987)                              |
| A8600_a01 | TrAa01MblClI    | $\text{ICl} \rightarrow \text{HOI} + \text{Cl}^- + \text{H}^+$                                                                                     | 2.4E6                  |             | Wang et al. (1989)                                |
| A8601_a01 | TrAa01MblClI    | $\text{I}^- + \text{HOCl} + \text{H}^+ \rightarrow \text{ICl}$                                                                                     | 3.5E11                 |             | Nagy et al. (1988)                                |
| A8602_a01 | TrAa01ClI       | $\text{IO}_2^- + \text{HOCl} \rightarrow \text{IO}_3^- + \text{Cl}^- + \text{H}^+$                                                                 | 1.5E3                  |             | Lengyel et al. (1996)                             |
| A8603_a01 | TrAa01MblClI    | $\text{HOI} + \text{Cl}^- + \text{H}^+ \rightarrow \text{ICl}$                                                                                     | 2.9E10                 |             | Wang et al. (1989)                                |
| A8604_a01 | TrAa01ClI       | $\text{HOI} + \text{Cl}_2 \rightarrow \text{IO}_2^- + 2 \text{Cl}^- + 3\text{H}^+$                                                                 | 1.0E6                  |             | Lengyel et al. (1996)                             |
| A8605_a01 | TrAa01ClI       | $\text{HOI} + \text{HOCl} \rightarrow \text{IO}_2^- + \text{Cl}^- + 2 \text{H}^+$                                                                  | 5.0E5                  |             | Citri and Epstein (1988)                          |
| A8606_a01 | TrAa01ClI       | $\text{ICl} + \text{I}^- \rightarrow \text{I}_2 + \text{Cl}^-$                                                                                     | 1.1E9                  |             | Margerum et al. (1986)                            |
| A8700_a01 | TrAa01MblBrI    | $\text{IBr} \rightarrow \text{HOI} + \text{H}^+ + \text{Br}^-$                                                                                     | 8.0E5                  |             | Troy et al. (1991)                                |
| A8701_a01 | TrAa01MblBrI    | $\text{I}^- + \text{HOBr} \rightarrow \text{IBr} + \text{OH}^-$                                                                                    | 5.0E9                  |             | Troy and Margerum (1991)                          |
| A8702_a01 | TrAa01BrI       | $\text{IO}_2^- + \text{HOBr} \rightarrow \text{IO}_3^- + \text{Br}^- + \text{H}^+$                                                                 | 1.0E6                  |             | Chinake and Simoyi (1996)                         |
| A8703_a01 | TrAa01MblBrI    | $\text{HOI} + \text{Br}^- + \text{H}^+ \rightarrow \text{IBr}$                                                                                     | 3.3E12                 |             | Troy et al. (1991)                                |
| A8704_a01 | TrAa01BrI       | $\text{HOI} + \text{HOBr} \rightarrow \text{IO}_2^- + \text{Br}^- + 2 \text{H}^+$                                                                  | 1.0E6                  |             | Chinake and Simoyi (1996)                         |
| A8705_a01 | TrAa01BrI       | $\text{IBr} + \text{I}^- \rightarrow \text{I}_2 + \text{Br}^-$                                                                                     | 2.0E9                  |             | Faria et al. (1993)                               |
| A9100_a01 | TrAa01ScS       | $\text{SO}_3^- + \text{O}_2 \rightarrow \text{SO}_5^-$                                                                                             | 1.5E9                  |             | Huie and Neta (1987)                              |
| A9101_a01 | TrAa01MblScScmS | $\text{SO}_3^{2-} + \text{O}_3 \rightarrow \text{SO}_4^{2-}$                                                                                       | 1.5E9                  | -5300       | Hoffmann (1986)                                   |
| A9102_a01 | TrAa01ScS       | $\text{SO}_4^- + \text{O}_2^- \rightarrow \text{SO}_4^{2-}$                                                                                        | 3.5E9                  |             | Jiang et al. (1992)                               |
| A9103_a01 | TrAa01ScS       | $\text{SO}_4^- + \text{SO}_3^{2-} \rightarrow \text{SO}_3^- + \text{SO}_4^{2-}$                                                                    | 4.6E8                  |             | Huie and Neta (1987)                              |
| A9104_a01 | TrAa01ScS       | $\text{SO}_5^- + \text{O}_2^- \rightarrow \text{HSO}_5^- + \text{OH}^-$                                                                            | 2.3E8                  |             | Buxton et al. (1996)                              |
| A9105_a01 | TrAa01S         | $\text{SO}_5^- + \text{SO}_3^{2-} \rightarrow .72 \text{SO}_4^- + .72 \text{SO}_4^{2-} + .28 \text{SO}_3^- + .28 \text{HSO}_5^- + .28 \text{OH}^-$ | 1.3E7                  |             | Huie and Neta (1987), Deister and Warneck (1990)* |
| A9106_a01 | TrAa01S         | $\text{SO}_5^- + \text{SO}_5^- \rightarrow \text{O}_2 + \text{SO}_4^{2-} + \text{LSULFUR}$                                                         | 1.0E8                  |             | Ross et al. (1992)*                               |
| A9200_a01 | TrAa01ScS       | $\text{SO}_3^- + \text{OH}^- \rightarrow \text{SO}_3^- + \text{OH}^-$                                                                              | 5.5E9                  |             | Buxton et al. (1988)                              |
| A9201_a01 | TrAa01ScS       | $\text{SO}_4^- + \text{OH}^- \rightarrow \text{HSO}_5^-$                                                                                           | 1.0E9                  |             | Jiang et al. (1992)                               |
| A9202_a01 | TrAa01ScS       | $\text{SO}_4^- + \text{HO}_2 \rightarrow \text{SO}_4^{2-} + \text{H}^+$                                                                            | 3.5E9                  |             | Jiang et al. (1992)                               |
| A9203_a01 | TrAa01ScS       | $\text{SO}_4^- + \text{H}_2\text{O} \rightarrow \text{SO}_4^{2-} + \text{H}^+ + \text{OH}^-$                                                       | 1.1E1                  | -1110       | Herrmann et al. (1995)                            |
| A9204_a01 | TrAa01ScS       | $\text{SO}_4^- + \text{H}_2\text{O}_2 \rightarrow \text{SO}_4^{2-} + \text{H}^+ + \text{HO}_2$                                                     | 1.2E7                  |             | Wine et al. (1989)                                |

Table 8: Aqueous phase reactions (...continued)

| #          | labels          | reaction                                                                                                                                        | $k_0 [M^{1-n} s^{-1}]$ | $-E_a/R[K]$ | reference                      |
|------------|-----------------|-------------------------------------------------------------------------------------------------------------------------------------------------|------------------------|-------------|--------------------------------|
| A9205_a01  | TrAa01ScS       | $\text{HSO}_3^- + \text{O}_2^- \rightarrow \text{SO}_4^{2-} + \text{OH}^-$                                                                      | 3.0E3                  |             | see note*                      |
| A9206_a01  | TrAa01MblScScmS | $\text{HSO}_3^- + \text{O}_3 \rightarrow \text{SO}_4^{2-} + \text{H}^+$                                                                         | 3.7E5                  | -5500       | Hoffmann (1986)                |
| A9207_a01  | TrAa01ScS       | $\text{HSO}_3^- + \text{OH}^- \rightarrow \text{SO}_3^-$                                                                                        | 4.5E9                  |             | Buxton et al. (1988)           |
| A9208_a01  | TrAa01ScS       | $\text{HSO}_3^- + \text{HO}_2 \rightarrow \text{SO}_4^{2-} + \text{OH}^- + \text{H}^+$                                                          | 3.0E3                  |             | see note*                      |
| A9209_a01  | TrAa01MblScScmS | $\text{HSO}_3^- + \text{H}_2\text{O}_2 \rightarrow \text{SO}_4^{2-} + \text{H}^+$                                                               | 5.2E6                  | -3650       | Martin and Damschen (1981)     |
| A9210_a01  | TrAa01ScS       | $\text{HSO}_3^- + \text{SO}_4^- \rightarrow \text{SO}_3^- + \text{SO}_4^{2-} + \text{H}^+$                                                      | 8.0E8                  |             | Huie and Neta (1987)           |
| A9211_a01  | TrAa01S         | $\text{HSO}_3^- + \text{SO}_5^- \rightarrow .75 \text{SO}_4^- + .75 \text{SO}_4^{2-} + .75 \text{H}^+ + .25 \text{SO}_3^- + .25 \text{HSO}_5^-$ | 1.0E5                  |             | Huie and Neta (1987)           |
| A9212_a01  | TrAa01ScS       | $\text{HSO}_3^- + \text{HSO}_5^- + \text{H}^+ \rightarrow 2 \text{HSO}_4^- + \text{H}^+$                                                        | 7.1E6                  |             | Betterton and Hoffmann (1988b) |
| A9301_a01  | TrAa01ScNS      | $\text{SO}_4^- + \text{NO}_3^- \rightarrow \text{SO}_4^{2-} + \text{NO}_3$                                                                      | 5.0E4                  |             | Exner et al. (1992)            |
| A9302_a01  | TrAa01ScNS      | $\text{SO}_4^{2-} + \text{NO}_3 \rightarrow \text{NO}_3^- + \text{SO}_4^-$                                                                      | 1.0E5                  |             | Logager et al. (1993)          |
| A9304_a01  | TrAa01ScNS      | $\text{HSO}_3^- + \text{NO}_3 \rightarrow \text{SO}_3^- + \text{NO}_3^- + \text{H}^+$                                                           | 1.4E9                  | -2000       | Exner et al. (1992)            |
| A9305_a01  | TrAa01ScNS      | $\text{HSO}_3^- + \text{HNO}_4 \rightarrow \text{HSO}_4^- + \text{NO}_3^- + \text{H}^+$                                                         | 3.1E5                  |             | Warneck (1999)                 |
| A9400_a01  | TrAa01ScS       | $\text{SO}_3^{2-} + \text{HCHO} \rightarrow \text{CH}_2\text{OHSO}_3^- + \text{OH}^-$                                                           | 1.4E4                  |             | Boyce and Hoffmann (1984)      |
| A9401_a01  | TrAa01ScS       | $\text{SO}_3^{2-} + \text{CH}_3\text{OOH} + \text{H}^+ \rightarrow \text{SO}_4^{2-} + \text{H}^+ + \text{CH}_3\text{OH}$                        | 1.6E7                  | -3800       | Lind et al. (1987)             |
| A9402_a01  | TrAa01ScS       | $\text{HSO}_3^- + \text{HCHO} \rightarrow \text{CH}_2\text{OHSO}_3^-$                                                                           | 4.3E-1                 |             | Boyce and Hoffmann (1984)      |
| A9403_a01  | TrAa01ScS       | $\text{HSO}_3^- + \text{CH}_3\text{OOH} + \text{H}^+ \rightarrow \text{HSO}_4^- + \text{H}^+ + \text{CH}_3\text{OH}$                            | 1.6E7                  | -3800       | Lind et al. (1987)             |
| A9404_a01  | TrAa01ScS       | $\text{CH}_2\text{OHSO}_3^- + \text{OH}^- \rightarrow \text{SO}_3^{2-} + \text{HCHO}$                                                           | 3.6E3                  |             | Seinfeld and Pandis (1998)     |
| A9600_a01  | TrAa01ClS       | $\text{SO}_3^{2-} + \text{Cl}_2^- \rightarrow \text{SO}_3^- + 2 \text{Cl}^-$                                                                    | 6.2E7                  |             | Jacobi et al. (1996)           |
| A9601_a01  | TrAa01MblClS    | $\text{SO}_3^{2-} + \text{HOCl} \rightarrow \text{Cl}^- + \text{HSO}_4^-$                                                                       | 7.6E8                  |             | Fogelman et al. (1989)         |
| A9602_a01  | TrAa01ClS       | $\text{SO}_4^- + \text{Cl}^- \rightarrow \text{SO}_4^{2-} + \text{Cl}$                                                                          | 2.5E8                  |             | Buxton et al. (1999a)          |
| A9603_a01  | TrAa01ClS       | $\text{SO}_4^- + \text{Cl} \rightarrow \text{SO}_4^- + \text{Cl}^-$                                                                             | 2.1E8                  |             | Buxton et al. (1999a)          |
| A9604_a01  | TrAa01ClS       | $\text{HSO}_3^- + \text{Cl}_2^- \rightarrow \text{SO}_3^- + 2 \text{Cl}^- + \text{H}^+$                                                         | 4.7E8                  | -1082       | Shoute et al. (1991)           |
| A9605_a01  | TrAa01MblClS    | $\text{HSO}_3^- + \text{HOCl} \rightarrow \text{Cl}^- + \text{HSO}_4^- + \text{H}^+$                                                            | 7.6E8                  |             | see note*                      |
| A9606_a01  | TrAa01ClS       | $\text{HSO}_5^- + \text{Cl}^- \rightarrow \text{HOCl} + \text{SO}_4^{2-}$                                                                       | 1.8E-3                 | -7352       | Fortnum et al. (1960)          |
| A9700_a01  | TrAa01BrS       | $\text{SO}_3^{2-} + \text{Br}_2^- \rightarrow 2 \text{Br}^- + \text{SO}_3^-$                                                                    | 2.2E8                  | -649        | Shoute et al. (1991)           |
| A9701_a01  | TrAa01BrS       | $\text{SO}_3^{2-} + \text{BrO}^- \rightarrow \text{Br}^- + \text{SO}_4^{2-}$                                                                    | 1.0E8                  |             | Troy and Margerum (1991)       |
| A9702_a01  | TrAa01MblBrS    | $\text{SO}_3^{2-} + \text{HOBr} \rightarrow \text{Br}^- + \text{HSO}_4^-$                                                                       | 5.0E9                  |             | Troy and Margerum (1991)       |
| A9703_a01  | TrAa01BrS       | $\text{SO}_4^- + \text{Br}^- \rightarrow \text{Br} + \text{SO}_4^{2-}$                                                                          | 2.1E9                  |             | Jacobi (1996)                  |
| A9704_a01  | TrAa01BrS       | $\text{HSO}_3^- + \text{Br}_2^- \rightarrow 2 \text{Br}^- + \text{H}^+ + \text{SO}_3^-$                                                         | 6.3E7                  | -782        | Shoute et al. (1991)           |
| A9705_a01  | TrAa01MblBrS    | $\text{HSO}_3^- + \text{HOBr} \rightarrow \text{Br}^- + \text{HSO}_4^- + \text{H}^+$                                                            | 5.0E9                  |             | see note*                      |
| A9706_a01  | TrAa01BrS       | $\text{HSO}_5^- + \text{Br}^- \rightarrow \text{HOBr} + \text{SO}_4^{2-}$                                                                       | 1.0E0                  | -5338       | Fogelman et al. (1989)         |
| A9800_a01  | TrAa01IS        | $\text{HSO}_3^- + \text{I}_2 \rightarrow 2 \text{I}^- + \text{HSO}_4^- + 2 \text{H}^+$                                                          | 1.7E9                  |             | Yiin and Margerum (1990)       |
| A10100_a01 | TrAa01Hg        | $\text{Hg} + \text{O}_3 \rightarrow \text{HgO} + \text{O}_2$                                                                                    | 4.7E7                  |             | Munthe (1992)                  |

Table 8: Aqueous phase reactions (...continued)

| #          | labels     | reaction                                         | $k_0 [M^{1-n} s^{-1}]$ | $-E_a/R[K]$ | reference                 |
|------------|------------|--------------------------------------------------|------------------------|-------------|---------------------------|
| A10200_a01 | TrAa01Hg   | $HgO + H^+ \rightarrow Hg^{2+} + OH^-$           | 1.0E10                 |             | Pleijel and Munthe (1995) |
| A10201_a01 | TrAa01Hg   | $Hg + OH \rightarrow Hg^+ + OH^-$                | 2.0E9                  |             | Lin and Pehkonen (1997)   |
| A10202_a01 | TrAa01Hg   | $Hg^+ + OH \rightarrow Hg^{2+} + OH^-$           | 1.0E10                 |             | Lin and Pehkonen (1997)   |
| A10203_a01 | TrAa01Hg   | $Hg^{2+} + HO_2 \rightarrow Hg^+ + O_2 + H^+$    | 1.7E4                  |             | Enami et al. (2007)       |
| A10204_a01 | TrAa01Hg   | $Hg^+ + HO_2 \rightarrow Hg + O_2 + H^+$         | 1.0E10                 |             | Lin and Pehkonen (1997)   |
| A10600_a01 | TrAa01ClHg | $Hg + HOCl \rightarrow Hg^{2+} + Cl^- + OH^-$    | 2.09E6                 |             | Lin and Pehkonen (1998)   |
| A10601_a01 | TrAa01ClHg | $Hg + ClO^- \rightarrow Hg^{2+} + Cl^- + 2 OH^-$ | 1.99E6                 |             | Lin and Pehkonen (1998)   |
| A10700_a01 | TrAa01BrHg | $Hg + HOBr \rightarrow Hg^{2+} + Br^- + OH^-$    | 0.279                  |             | Wang and Pehkonen (2004)  |
| A10701_a01 | TrAa01BrHg | $Hg + BrO^- \rightarrow Hg^{2+} + Br^- + 2 OH^-$ | 0.273                  |             | Wang and Pehkonen (2004)  |
| A10702_a01 | TrAa01BrHg | $Hg + Br_2 \rightarrow Hg^{2+} + 2 Br^-$         | 0.196                  |             | Wang and Pehkonen (2004)  |
| A10900_a01 | TrAa01HgS  | $HgSO_3 \rightarrow Hg + HSO_4^- + H^+$          | 0.0106                 |             | van Loon et al. (2000)    |

## Specific notes

A6102\_a01: Jacobi (1996) found an upper limit of 6E9 and cite an upper limit from another study of 2E9. Here, we set the rate coefficient to 1E9.

A6301\_a01: There is also an earlier study by Exner et al. (1992) which found a smaller rate coefficient but did not consider the back reaction.

A7400\_a01: Assumed to be the same as for  $Br_2^- + H_2O_2$ .

A7603\_a01: The rate coefficient is defined as backward reaction divided by equilibrium constant.

A9105\_a01: The rate coefficient for the sum of the paths (leading to either  $HSO_5^-$  or  $SO_4^{2-}$ ) is from Huie and Neta (1987), the ratio 0.28/0.72 is from Deister and Warneck (1990).

A9106\_a01: See also: (Huie and Neta, 1987; Warneck, 1991). If this reaction produces a lot of  $SO_4^-$ , it will have an effect. However, we currently assume only the stable  $S_2O_8^{2-}$  as product. Since  $S_2O_8^{2-}$  is not treated explic-

itly in the mechanism,  $SO_4^{2-}$  is used as a proxy and the second sulfur atom is put into the lumped LSULFUR.

A9205\_a01: D. Sedlak, pers. comm. (1993).

A9208\_a01: D. Sedlak, pers. comm. (1993).

A9605\_a01: Assumed to be the same as for  $SO_3^{2-} + HOCl$ .

A9705\_a01: Assumed to be the same as for  $SO_3^{2-} + HOBr$ .

## References

- Abbatt, J. P. D. and Waschewsky, G. C. G.: Heterogeneous interactions of HOBr, HNO<sub>3</sub>, O<sub>3</sub>, and NO<sub>2</sub> with deliquescent NaCl aerosols at room temperature, *J. Phys. Chem. A*, 102, 3719–3725, 1998.
- Albaladejo, J., Jiménez, E., Notario, A., Cabañas, B., and Martínez, E.: CH<sub>3</sub>O yield in the CH<sub>3</sub> + O<sub>3</sub> reaction using the LP/LIF technique at room temperature, *J. Phys. Chem. A*, 106, 2512–2519, doi:10.1021/jp012249o, 2002.
- Ammann, M. and Pöschl, U.: Kinetic model framework for aerosol and cloud surface chemistry and gas-particle interactions - Part 2: exemplary practical applications and numerical simulations, *Atmos. Chem. Phys.*, 7, 6025–6045, 2007.
- Anderson, L. C. and Fahey, D. W.: Studies with ClONO<sub>2</sub>: Thermal dissociation rate and catalytic conversion to NO using an NO/O<sub>3</sub> chemiluminescence detector, *J. Phys. Chem.*, 94, 644–652, 1990.
- Andrews, D. U., Heazlewood, B. R., Maccarone, A. T., Conroy, T., Payne, R. J., Jordan, M. J. T., and Kable, S. H.: Photo-tautomerization of acetaldehyde to vinyl alcohol: a potential route to tropospheric acids, *Science*, 337, 1203–1206, doi:10.1126/science.1220712, 2012.
- Ariya, P. A., Khalizov, A., and Gidas, A.: Reactions of gaseous mercury with atomic and molecular halogens: Kinetics, product studies, and atmospheric implications, *J. Phys. Chem. A*, 106, 7310–7320, 2002.
- Aschmann, S. M., Nishino, N., Arey, J., and Atkinson, R.: Products of the OH radical-initiated reactions of furan, 2- and 3-methylfuran, and 2,3- and 2,5-dimethylfuran in the presence of NO, *J. Phys. Chem. A*, 118, 457–466, doi:10.1021/jp410345k, 2014.
- Atkinson, R.: Gas-phase tropospheric chemistry of volatile organic compounds: 1. Alkanes and alkenes, *J. Phys. Chem. Ref. Data*, 26, 215–290, 1997.
- Atkinson, R.: Kinetics of the gas-phase reactions of OH radicals with alkanes and cycloalkanes, *Atmos. Chem. Phys.*, 3, 2233–2307, 2003.
- Atkinson, R., Baulch, D. L., Cox, R. A., Crowley, J. N., Hampson, R. F., Hynes, R. G., Jenkin, M. E., Rossi, M. J., and Troe, J.: Evaluated kinetic and photochemical data for atmospheric chemistry: Volume I – gas phase reactions of O<sub>x</sub>, HO<sub>x</sub>, NO<sub>x</sub> and SO<sub>x</sub> species, *Atmos. Chem. Phys.*, 4, 1461–1738, 2004.
- Atkinson, R., Baulch, D. L., Cox, R. A., Crowley, J. N., Hampson, R. F., Hynes, R. G., Jenkin, M. E., Rossi, M. J., Troe, J., and IUPAC Subcommittee: Evaluated kinetic and photochemical data for atmospheric chemistry: Volume II – gas phase reactions of organic species, *Atmos. Chem. Phys.*, 6, 3625–4055, 2006.
- Atkinson, R., Baulch, D. L., Cox, R. A., Crowley, J. N., Hampson, R. F., Hynes, R. G., Jenkin, M. E., Rossi, M. J., and Troe, J.: Evaluated kinetic and photochemical data for atmospheric chemistry: Volume III – gas phase reactions of inorganic halogens, *Atmos. Chem. Phys.*, 7, 981–1191, 2007.
- Baeza-Romero, M. T., Glowacki, D. R., Blitz, M. A., Heard, D., Pilling, M. J., Rickard, A. R., and Seakins, P. W.: A combined experimental and theoretical study of the reaction between methylglyoxal and OH/OD radical: OH regeneration, *Phys. Chem. Chem. Phys.*, 9, 4114–4128, doi:10.1039/b702916k, 2007.
- Bailey, S. M., Barth, C. A., and Solomon, S. C.: A model of nitric oxide in the lower thermosphere, *J. Geophys. Res.*, 107, doi:10.1029/2001JA000258, 2002.
- Bale, C. S. E., Canosa-Mas, C. E., Shallcross, D. E., and Wayne, R. P.: A discharge-flow study of the kinetics of the reactions of IO with CH<sub>3</sub>O<sub>2</sub> and CF<sub>3</sub>O<sub>2</sub>, *Phys. Chem. Chem. Phys.*, 7, 2164–2172, 2005.
- Banic, C. M., Beauchamp, S. T., Tordon, R. J., Schroeder, W. H., Steffen, A., Anlauf, K. A., and Wong, H. K. T.: Vertical distribution of gaseous elemental mercury in Canada, *J. Geophys. Res.*, 108D, 4264, doi:10.1029/2002JD002116, 2003.
- Barker, G. C., Fowles, P., and Stringer, B.: Pulse radiolytic induced transient electrical conductance in liquid solutions, *Trans. Faraday Soc.*, 66, 1509–1519, 1970.
- Barnes, I., Becker, K. H., Fink, E. H., Reimer, A., Zabel, F., and Niki, H.: FTIR spectroscopic study of the gas-phase reaction of HO<sub>2</sub> with H<sub>2</sub>CO, *Chem. Phys. Lett.*, 115, 1–8, doi:10.1016/0009-2614(85)80091-9, 1985.
- Barnes, I., Becker, K. H., and Zhu, T.: Near UV absorption-spectra and photolysis products of difunctional organic nitrates - possible importance as NO<sub>x</sub> reservoirs, *J. Atmos. Chem.*, 17, 353–373, 1993.
- Barone, S. B., Turnipseed, A. A., and Ravishankara, A. R.: Role of adducts in the atmospheric oxidation of dimethyl sulfide, *Faraday Discuss.*, 100, 39–54, 1995.
- Barth, C. A.: Nitric oxide in the lower thermosphere, *Planet. Space Sci.*, 40, 315–336, 1992.
- Bartlett, W. P. and Margerum, D. W.: Temperature dependencies of the Henry's law constant and the aqueous phase dissociation constant of bromine chloride, *Environ. Sci. Technol.*, 33, 3410–3414, 1999.



- Bates, K. H., Crounse, J. D., St. Clair, J. M., Bennett, N. B., Nguyen, T. B., Seinfeld, J. H., Stoltz, B. M., and Wennberg, P. O.: Gas phase production and loss of isoprene epoxydiols, *J. Phys. Chem. A*, 118, 1237–1246, doi:10.1021/jp4107958, 2014.
- Baulch, D. L., Bowman, C. T., Cobos, C. J., Cox, R. A., Just, T., Kerr, J. A., Pilling, M. J., Stocker, D., Troe, J., Tsang, W., Walker, R. W., and Warnatz, J.: Evaluated kinetic data for combustion modeling: Supplement II, *J. Phys. Chem. Ref. Data*, 34, 757–1397, 2005.
- Becker, K. H., Kurtenbach, R., Schmidt, F., and Wiesen, P.: Kinetics of the NCO radical reacting with atoms and selected molecules, *Combust. Flame*, 120, 570–577, doi:10.1016/S0010-2180(99)00108-X, 2000.
- Beckwith, R. C., Wang, T. X., and Margerum, D. W.: Equilibrium and kinetics of bromine hydrolysis, *Inorg. Chem.*, 35, 995–1000, 1996.
- Bedjanian, Y., Laverdet, G., and Le Bras, G.: Low-pressure study of the reaction of Cl atoms with isoprene, *J. Phys. Chem. A*, 102, 953–959, 1998.
- Behnke, W., Scheer, V., and Zetzsch, C.: Production of BrNO<sub>2</sub>, Br<sub>2</sub> and ClNO<sub>2</sub> from the reaction between sea spray aerosol and N<sub>2</sub>O<sub>5</sub>, *J. Aerosol Sci.*, 25, S277–S278, 1994.
- Behnke, W., George, C., Scheer, V., and Zetzsch, C.: Production and decay of ClNO<sub>2</sub> from the reaction of gaseous N<sub>2</sub>O<sub>5</sub> with NaCl solution: Bulk and aerosol experiments, *J. Geophys. Res.*, 102D, 3795–3804, 1997.
- Betterton, E. A. and Hoffmann, M. R.: Henry’s law constants of some environmentally important aldehydes, *Environ. Sci. Technol.*, 22, 1415–1418, 1988a.
- Betterton, E. A. and Hoffmann, M. R.: Oxidation of aqueous SO<sub>2</sub> by peroxydisulfate, *J. Phys. Chem.*, 92, 5962–5965, 1988b.
- Beyersdorf, A. J., Blake, D. R., Swanson, A., Meinardi, S., Rowland, F. S., and Davis, D.: Abundances and variability of tropospheric volatile organic compounds at the South Pole and other Antarctic locations, *Atmos. Environ.*, 44, 4565–4574, doi:10.1016/j.atmosenv.2010.08.025, 2010.
- Bichsel, Y. and von Gunten, U.: Oxidation of iodide and hypiodous acid in the disinfection of natural waters, *Environ. Sci. Technol.*, 33, 4040–4045, 1999.
- Birdsall, A. W., Andreoni, J. F., and Elrod, M. J.: Investigation of the role of bicyclic peroxy radicals in the oxidation mechanism of toluene, *J. Phys. Chem. A*, 114, 10 655–10 663, doi:10.1021/jp105467e, 2010.
- Bjergbakke, E., Navartnam, S., Parsons, B. J., and Swallow, A. J.: Reaction between HO<sub>2</sub>· and chlorine in aqueous solution, *J. Am. Chem. Soc.*, 103, 5926–5928, 1981.
- Blatchley, III, E. R., Johnson, R. W., Alleman, J. E., and McCoy, W. F.: Effective Henry’s law constants for free chlorine and free bromine, *Wat. Res.*, 26, 99–106, 1992.
- Bossolasco, A., Faragó, E. P., Schoemaeker, C., and Fittschen, C.: Rate constant of the reaction between CH<sub>3</sub>O<sub>2</sub> and OH radicals, *Chem. Phys. Lett.*, 593, 7–13, doi:10.1016/j.cplett.2013.12.052, 2014.
- Boyce, S. D. and Hoffmann, M. R.: Kinetics and mechanism of the formation of hydroxymethanesulfonic acid at low pH, *J. Phys. Chem.*, 88, 4740–4746, 1984.
- Braban, C. F., Adams, J. W., Rodriguez, D., Cox, R. A., Crowley, J. N., and Schuster, G.: Heterogeneous reactions of HOI, ICl and IBr on sea salt and sea salt proxies, *Phys. Chem. Chem. Phys.*, 9, 3136–3148, 2007.
- Brimblecombe, P. and Clegg, S. L.: Erratum, *J. Atmos. Chem.*, 8, 95, 1989.
- Buras, Z. J., Elsamra, R. M. I., and Green, W. H.: Direct determination of the simplest Criegee intermediate (CH<sub>2</sub>OO) self reaction rate, *J. Phys. Chem. Lett.*, 5, 2224–2228, doi:10.1021/jz5008406, 2014.
- Butkovskaya, N., Kukui, A., and Le Bras, G.: Pressure and temperature dependence of ethyl nitrate formation in the C<sub>2</sub>H<sub>5</sub>O<sub>2</sub> + NO reaction, *J. Phys. Chem. A*, 114, 956–964, doi:10.1021/jp910003a, 2010.
- Butkovskaya, N., Kukui, A., and Le Bras, G.: Pressure and temperature dependence of methyl nitrate formation in the CH<sub>3</sub>O<sub>2</sub> + NO reaction, *J. Phys. Chem. A*, 116, 5972–5980, doi:10.1021/jp210710d, 2012.
- Buxton, G. V., Kilner, C., and Sellers, R. M.: Pulse radiolysis of HOI and IO<sup>-</sup> in aqueous solution. Formation and characterization of I(II), *Proc. Tihany Symp. Radiat. Chem.*, 6, 155–159, 1986.
- Buxton, G. V., Greenstock, C. L., Helman, W. P., and Ross, A. B.: Critical review of rate constants for reactions of hydrated electrons, hydrogen atoms and hydroxyl radicals (·OH/·O<sup>-</sup>) in aqueous solution, *J. Phys. Chem. Ref. Data*, 17, 513–886, 1988.
- Buxton, G. V., McGowan, S., Salmon, G. A., Williams, J. E., and Wood, N. D.: A study of the spectra and reactivity of oxysulphur-radical anions involved in the chain oxidation of S(IV): A pulse and γ-radiolysis study, *Atmos. Environ.*, 30, 2483–2493, 1996.

- Buxton, G. V., Bydder, M., and Salmon, G. A.: The reactivity of chlorine atoms in aqueous solution: Part II. The equilibrium  $\text{SO}_4^- + \text{Cl}^- \rightleftharpoons \text{Cl} + \text{SO}_4^{2-}$ , *Phys. Chem. Chem. Phys.*, 1, 269–273, 1999a.
- Buxton, G. V., Salmon, G. A., and Wang, J. Q.: The equilibrium  $\text{NO}_3 + \text{Cl}^- \rightleftharpoons \text{NO}_3^- + \text{Cl}$ : A laser flash photolysis and pulse radiolysis study of the reactivity of  $\text{NO}_3$  with chloride ion in aqueous solution, *Phys. Chem. Chem. Phys.*, 1, 3589–3593, 1999b.
- Calvert, J. G. and Lindberg, S. E.: A modeling study of the mechanism of the halogen-ozone-mercury homogeneous reactions in the troposphere during the polar spring, *Atmos. Environ.*, 37, 4467–4481, 2003.
- Canosa-Mas, C. E., King, M. D., Lopez, R., Percival, C. J., Wayne, R. P., Shallcross, D. E., Pyle, J. A., and Daele, V.: Is the reaction between  $\text{CH}_3(\text{O})\text{O}_2$  and  $\text{NO}_3$  important in the night-time troposphere?, *J. Chem. Soc. Faraday Trans.*, 92, 2211–2222, 1996.
- Capouet, M., Müller, J.-F., Ceulemans, K., Compernelle, S., Vereecken, L., and Peeters, J.: Modeling aerosol formation in alpha-pinene photo-oxidation experiments, *J. Geophys. Res.*, 8, doi:10.1029/2007JD008995, 2008.
- Carl, S. A. and Crowley, J. N.: 298 K rate coefficients for the reaction of OH with *i*- $\text{C}_3\text{H}_7\text{I}$ , *n*- $\text{C}_3\text{H}_7\text{I}$  and  $\text{C}_3\text{H}_8$ , *Atmos. Chem. Phys.*, 1, 1–7, 2001.
- Chai, J., Hu, H., Dibble, T. S., Tyndall, G. S., and Orlando, J. J.: Rate constants and kinetic isotope effects for methoxy radical reacting with  $\text{NO}_2$  and  $\text{O}_2$ , *J. Phys. Chem. A*, 118, 3552–3563, doi:10.1021/jp501205d, 2014.
- Chameides, W. L.: The photochemistry of a remote marine stratiform cloud, *J. Geophys. Res.*, 89D, 4739–4755, 1984.
- Chao, W., Hsieh, J.-T., Chang, C.-H., and Lin, J. J.-M.: Direct kinetic measurement of the reaction of the simplest Criegee intermediate with water vapor, *Science*, 347, 751–754, doi:10.1126/science.1261549, 2015.
- Chatfield, R. B. and Crutzen, P. J.: Are there interactions of iodine and sulfur species in marine air photochemistry?, *J. Geophys. Res.*, 95D, 22 319–22 341, 1990.
- Chen, J., Wenger, J. C., and Venables, D. S.: Near-ultraviolet absorption cross sections of nitrophenols and their potential influence on tropospheric oxidation capacity, *J. Phys. Chem. A*, 115, 12 235–12 242, doi:10.1021/jp206929r, 2011.
- Chin, M. and Wine, P. H.: A temperature-dependent competitive kinetics study of the aqueous-phase reactions of OH radicals with formate, formic acid, acetate, acetic acid, and hydrated formaldehyde, in: *Aquatic and Surface Photochemistry*, edited by Helz, G. R., Zepp, R. G., and Crosby, D. G., pp. 85–96, A. F. Lewis, NY, 1994.
- Chinake, C. R. and Simoyi, R. H.: Kinetics and mechanism of the complex bromate-iodine reaction, *J. Phys. Chem.*, 100, 1643–1656, 1996.
- Christensen, H. and Sehested, K.:  $\text{HO}_2$  and  $\text{O}_2^-$  radicals at elevated temperatures, *J. Phys. Chem.*, 92, 3007–3011, 1988.
- Christensen, H., Sehested, K., and Corfitzen, H.: Reactions of hydroxyl radicals with hydrogen peroxide at ambient and elevated temperatures, *J. Phys. Chem.*, 86, 1588–1590, 1982.
- Christensen, L. E., Okumura, M., Sander, S. P., Salawitch, R. J., Toon, G. C., Sen, B., Blavier, J.-F., and Jucks, K. W.: Kinetics of  $\text{HO}_2 + \text{HO}_2 \rightarrow \text{H}_2\text{O}_2 + \text{O}_2$ : Implications for stratospheric  $\text{H}_2\text{O}_2$ , *Geophys. Res. Lett.*, 29, doi:10.1029/2001GL014525, 2002.
- Citri, O. and Epstein, I. R.: Mechanistic study of a coupled chemical oscillator: the bromate-chlorite-iodide reaction, *J. Phys. Chem.*, 92, 1865–1871, 1988.
- Clubb, A. E., Jordan, M. J. T., Kable, S. H., and Osborn, D. L.: Phototautomerization of acetaldehyde to vinyl alcohol: a primary process in UV-irradiated acetaldehyde from 295 to 335 nm, *J. Phys. Chem. Lett.*, 3, 3522–3526, doi:10.1021/jz301701x, 2012.
- Clyne, M. A. A. and Cruse, H. W.: Atomic resonance fluorescence spectrometry for the rate constants of rapid bimolecular reactions. Part 2. Reactions  $\text{Cl} + \text{BrCl}$ ,  $\text{Cl} + \text{Br}_2$ ,  $\text{Cl} + \text{ICl}$ ,  $\text{Br} + \text{IBr}$ ,  $\text{Br} + \text{ICl}$ , *J. Chem. Soc. Faraday Trans. 2*, 68, 1377–1387, 1972.
- Conn, J. B., Kistiakowsky, G. B., Roberts, R. M., and Smith, E. A.: Heats of organic reactions. XIII. Heats of hydrolysis of some acid anhydrides, *Journal of the American Chemical Society*, 64, 1747–1752, doi:10.1021/ja01260a001, 1942.
- Damschen, D. E. and Martin, L. R.: Aqueous aerosol oxidation of nitrous acid by  $\text{O}_2$ ,  $\text{O}_3$  and  $\text{H}_2\text{O}_2$ , *Atmos. Environ.*, 17, 2005–2011, 1983.
- Davidovits, P., Hu, J. H., Worsnop, D. R., Zahniser, M. S., and Kolb, C. E.: Entry of gas molecules into liquids, *Faraday Discuss.*, 100, 65–81, 1995.
- Davis, D., Chen, G., Kasibhatla, P., Jefferson, A., Tanner, D., Eisele, F., Lenschow, D., Neff, W., and Berresheim, H.: DMS oxidation in the Antarctic marine boundary layer: Comparison of model simulations and field observations of DMS, DMSO,  $\text{DMSO}_2$ ,  $\text{H}_2\text{SO}_4(\text{g})$ ,  $\text{MSA}(\text{g})$ , and  $\text{MSA}(\text{p})$ , *J. Geophys. Res.*, 103D, 1657–1678, 1998.

- Davis, Jr., W. and de Bruin, H. J.: New activity coefficients of 0-100 per cent aqueous nitric acid, *J. Inorg. Nucl. Chem.*, 26, 1069–1083, 1964.
- daSilva, G.: Carboxylic acid catalyzed keto-enol tautomerizations in the gas phase, *Angew. Chem.*, 122, 7685–7687, doi:10.1002/ange.201003530, 2010.
- De Bruyn, W. J., Shorter, J. A., Davidovits, P., Worsnop, D. R., Zahniser, M. S., and Kolb, C. E.: Uptake of gas-phase sulfur species methanesulfonic acid, dimethylsulfoxide, and dimethyl sulfone by aqueous surfaces, *J. Geophys. Res.*, 99D, 16 927–16 932, 1994.
- Deiber, G., George, C., Le Calvé, S., Schweitzer, F., and Mirabel, P.: Uptake study of ClONO<sub>2</sub> and BrONO<sub>2</sub> by halide containing droplets, *Atmos. Chem. Phys.*, 4, 1291–1299, 2004.
- Deister, U. and Warneck, P.: Photooxidation of SO<sub>3</sub><sup>2-</sup> in aqueous solution, *J. Phys. Chem.*, 94, 2191–2198, 1990.
- DeMore, W. B., Sander, S. P., Golden, D. M., Hampson, R. F., Kurylo, M. J., Howard, C. J., Ravishankara, A. R., Kolb, C. E., and Molina, M. J.: Chemical kinetics and photochemical data for use in stratospheric modeling. Evaluation number 12, JPL Publication 97-4, Jet Propulsion Laboratory, Pasadena, CA, 1997.
- Dickson, A. G. and Millero, F. J.: A comparison of the equilibrium constants for the dissociation of carbonic acid in seawater media, *Deep-Sea Res. A*, 34, 1733–1743, 1987.
- Dillon, T. J., Karunanandan, R., and Crowley, J. N.: The reaction of IO with CH<sub>3</sub>SCH<sub>3</sub>: Products and temperature dependent rate coefficients by laser induced fluorescence, *Phys. Chem. Chem. Phys.*, 8, 847–855, 2006a.
- Dillon, T. J., Tucceri, M. E., and Crowley, J. N.: Laser induced fluorescence studies of iodine oxide chemistry. Part II. The reactions of IO with CH<sub>3</sub>O<sub>2</sub>, CF<sub>3</sub>O<sub>2</sub> and O<sub>3</sub>, *Phys. Chem. Chem. Phys.*, 8, 5185–5198, 2006b.
- Dillon, T. J., Tucceri, M. E., Sander, R., and Crowley, J. N.: LIF studies of iodine oxide chemistry, part 3. Reactions IO + NO<sub>3</sub> → OIO + NO<sub>2</sub>, I + NO<sub>3</sub> → IO + NO<sub>2</sub>, and CH<sub>2</sub>I + O<sub>2</sub> → (products): Implications for the chemistry of the marine atmosphere at night., *Phys. Chem. Chem. Phys.*, 10, 1540–1554, 2008.
- Dolson, D. A. and Leone, S. R.: A reinvestigation of the laser-initiated chlorine/hydrogen bromide chain reaction: absolute rate constants and the v = 2/v = 1 ratio from chlorine atom + hydrogen bromide → hydrogen chloride(v) + bromine atom, *J. Phys. Chem.*, 91, 3543–3550, 1987.
- Donohoue, D. L., Bauer, D., Cossairt, B., and Hynes, A. J.: Temperature and pressure dependent rate coefficients for the reaction of Hg with Br and the reaction of Br with Br: a pulsed laser photolysis-pulsed laser induced fluorescence study, *J. Phys. Chem. A*, 110, 6623–6632, 2006.
- Duff, J. W., Dothe, H., and Sharma, R. D.: On the rate coefficient of the N(<sup>2</sup>D)+O<sub>2</sub> → NO+O reaction in the terrestrial thermosphere, *Geophys. Res. Lett.*, 30, 1259–1263, 2003.
- Edblom, E. C., Györgyi, L., Orbán, M., and Epstein, I. R.: A mechanism for dynamical behavior in the Landolt reaction with ferrocyanide, *J. Am. Chem. Soc.*, 109, 4876–4880, 1987.
- Eigen, M. and Kustin, K.: The kinetics of halogen hydrolysis, *J. Am. Chem. Soc.*, 84, 1355–1361, 1962.
- Enami, S., Hoshino, Y., and Kawasaki, M.: A kinetic study of the gas-phase reactions of OIO with NO, NO<sub>2</sub>, and Cl<sub>2</sub>, *Int. J. Chem. Kinetics*, 39, 688–693, 2007.
- Espinosa-Garcia, J. and Garcia-Bernáldez, J. C.: Analytical potential energy surface for the CH<sub>4</sub> + O(<sup>3</sup>P) → CH<sub>3</sub> + OH reaction. Thermal rate constants and kinetic isotope effects, *Phys. Chem. Chem. Phys.*, 2, 2345–2351, doi:10.1039/b001038n, 2000.
- Exner, M., Herrmann, H., and Zellner, R.: Laser-based studies of reactions of the nitrate radical in aqueous solution, *Ber. Bunsenges. Phys. Chem.*, 96, 470–477, 1992.
- Faria, R. B., Lengyel, I., Epstein, I. R., and Kustin, K.: Combined mechanism explaining nonlinear dynamics in bromine(III) and bromine(V) oxidations of iodide ion, *J. Phys. Chem.*, 97, 1164–1171, 1993.
- Feierabend, K. J., Zhu, L., Talukdar, R. K., and Burkholder, J. B.: Rate coefficients for the OH + HC(O)C(O)H (glyoxal) reaction between 210 and 390 K, *J. Phys. Chem. A*, 112, 73–82, 2008.
- Fell, C., Steinfeld, J. I., and Miller, S.: Quenching of N(<sup>2</sup>D) by O(<sup>3</sup>P), *J. Chem. Phys.*, 92, 4768–4777, 1990.
- Finkbeiner, M., Crowley, J. N., Horie, O., Müller, R., Moortgat, G. K., and Crutzen, P. J.: Reaction between HO<sub>2</sub> and ClO: Product formation between 210 and 300 K, *J. Phys. Chem.*, 99, 16 264–16 275, 1995.
- Flocke, F., Atlas, E., Madronich, S., Schauffler, S. M., Aikin, K., Margitan, J. J., and Bui, T. P.: Observations of methyl nitrate in the lower stratosphere

- during STRAT: implications for its gas phase production mechanisms, *Geophys. Res. Lett.*, 25, 1891–1894, 1998.
- Fogelman, K. D., Walker, D. M., and Margerum, D. W.: Non-metal redox kinetics: Hypochlorite and hypochlorous acid reactions with sulfite, *Inorg. Chem.*, 28, 986–993, 1989.
- Fortnum, D. H., Battaglia, C. J., Cohen, S. R., and Edwards, J. O.: The kinetics of the oxidation of halide ions by monosubstituted peroxides, *J. Am. Chem. Soc.*, 82, 778–782, 1960.
- Francisco-Marquez, M., Alvarez-Idaboy, J. R., Galano, A., and Vivier-Bunge, A.: Theoretical study of the initial reaction between OH and isoprene in tropospheric conditions, *Phys. Chem. Chem. Phys.*, 5, 1392–1399, doi:10.1039/B211185C, 2003.
- Fuller-Rowell, T. J.: Modeling the solar cycle change in nitric oxide in the thermosphere and upper mesosphere, *J. Geophys. Res.*, 98A, 1559–1570, 1993.
- Furrow, S.: Reactions of iodine intermediates in iodate-hydrogen peroxide oscillators, *J. Phys. Chem.*, 91, 2129–2135, 1987.
- Gans, B., Boyé-Peronne, S., Broquier, M., Delsaut, M., Douin, S., Fellows, C. E., Halvick, P., Loison, J.-C., Lucchese, R. R., and Gauyacq, D.: Photolysis of methane revisited at 121.6 nm and at 118.2 nm: quantum yields of the primary products, measured by mass spectrometry, *Phys. Chem. Chem. Phys.*, 13, 8140–8152, doi:10.1039/c0cp02627a, 2011.
- Ganzeveld, L., Klemm, O., Rappenglück, B., and Valverde-Canossa, J.: Evaluation of meteorological parameters over a coniferous forest in a single-column chemistry-climate model, *Atmos. Environ.*, 40, S21–S27, 2006.
- Garton, D. J., Minton, T. K., Troya, D., Pascual, R., and Schatz, G. C.: Hyperthermal reactions of O(<sup>3</sup>P) with alkanes: Observations of novel reaction pathways in crossed-beams and theoretical studies, *J. Phys. Chem. A*, 107, 4583–4587, doi:10.1021/jp0226026, 2003.
- Gill, K. J. and Hites, R. A.: Rate constants for the gas-phase reactions of the hydroxyl radical with isoprene,  $\alpha$ - and  $\beta$ -pinene, and limonene as a function of temperature, *J. Phys. Chem. A*, 106, 2538–2544, doi:10.1021/jp013532q, 2002.
- Glowacki, D. R., Lockhart, J., Blitz, M. A., Klippenstein, S. J., Pilling, M. J., Robertson, S. H., and Seakins, P. W.: Interception of excited vibrational quantum states by O<sub>2</sub> in atmospheric association reactions, *Science*, 337, 1066–1069, doi:10.1126/science.1224106, 2012.
- Goodsite, M., Plane, J. M. C., and Skov, H.: A theoretical study of the oxidation of Hg<sup>0</sup> to HgBr<sub>2</sub> in the troposphere, *Environ. Sci. Technol.*, 38, 1772–1776, 2004.
- Grenfell, J. L., Lehmann, R., Mieth, P., Langematz, U., and Steil, B.: Chemical reaction pathways affecting stratospheric and mesospheric ozone, *J. Geophys. Res.*, 111D, doi:10.1029/2004JD005713, 2006.
- Groß, C. B. M., Dillon, T. J., Schuster, G., Lelieveld, J., and Crowley, J. N.: Direct kinetic study of OH and O<sub>3</sub> formation in the Reaction of CH<sub>3</sub>C(O)O<sub>2</sub> with HO<sub>2</sub>, *J. Phys. Chem. A*, 1, 974–985, doi:10.1021/jp412380z, 2014.
- Gruzdev, A. N., Elokhov, A. S., Makarov, O. V., and Mokhov, I. I.: Some recent results of Russian measurements of surface ozone in Antarctica. A meteorological interpretation, *Tellus*, 45B, 99–105, 1993.
- Haag, W. R. and Hoigné, J.: Ozonation of bromide-containing waters: Kinetics of formation of hypobromous acid and bromate, *Environ. Sci. Technol.*, 17, 261–267, 1983.
- Hall, B.: The gas phase oxidation of elemental mercury by ozone, *Water Air Soil Pollut.*, 80, 301–315, 1995.
- Hanson, D. R., Burkholder, J. B., Howard, C. J., and Ravishankara, A. R.: Measurement of OH and HO<sub>2</sub> radical uptake coefficients on water and sulfuric acid surfaces, *J. Phys. Chem.*, 96, 4979–4985, 1992.
- Hatakeyama, S., Honda, S., and Akimoto, H.: Rate constants and mechanism for reactions of ketenes with OH radicals in air at 299±2 K, *Bull. Chem. Soc. Jpn.*, 58, 2157–2162, 1985.
- Hermans, I., Müller, J.-F., Nguyen, T. L., Jacobs, P. A., and Peeters, J.: Kinetics of  $\alpha$ -hydroxy-alkylperoxy radicals in oxidation processes. HO<sub>2</sub>-initiated oxidation of ketones/aldehydes near the tropopause, *J. Phys. Chem. A*, 109, 4303–4311, doi:10.1021/jp044080v, 2005.
- Herrmann, H., Reese, A., and Zellner, R.: Time resolved UV/VIS diode array absorption spectroscopy of SO<sub>x</sub><sup>-</sup> (x=3, 4, 5) radical anions in aqueous solution, *J. Mol. Struct.*, 348, 183–186, 1995.
- Herrmann, H., Ervens, B., Nowacki, P., Wolke, R., and Zellner, R.: A chemical aqueous phase radical mechanism for tropospheric chemistry, *Chemosphere*, 38, 1223–1232, 1999.
- Hoffmann, M. R.: On the kinetics and mechanism of oxidation of aquated sulfur dioxide by ozone, *Atmos. Environ.*, 20, 1145–1154, 1986.
- Hoigné, J., Bader, H., Haag, W. R., and Staehelin, J.: Rate constants of reactions of ozone with organic and

- inorganic compounds in water – III Inorganic compounds and radicals, *Wat. Res.*, 19, 993–1004, 1985.
- Holmes, N. S., Adams, J. W., and Crowley, J. N.: Uptake and reaction of HOI and IONO<sub>2</sub> on frozen and dry NaCl/NaBr surfaces and H<sub>2</sub>SO<sub>4</sub>, *Phys. Chem. Chem. Phys.*, 3, 1679–1687, 2001.
- Hu, J. H., Shi, Q., Davidovits, P., Worsnop, D. R., Zahniser, M. S., and Kolb, C. E.: Reactive uptake of Cl<sub>2</sub>(g) and Br<sub>2</sub>(g) by aqueous surfaces as a function of Br<sup>-</sup> and I<sup>-</sup> ion concentration: The effect of chemical reaction at the interface, *J. Phys. Chem.*, 99, 8768–8776, 1995.
- Huie, R. E. and Neta, P.: Rate constants for some oxidations of S(IV) by radicals in aqueous solutions, *Atmos. Environ.*, 21, 1743–1747, 1987.
- Huthwelker, T., Clegg, S. L., Peter, T., Carslaw, K., Luo, B. P., and Brimblecombe, P.: Solubility of HOCl in water and aqueous H<sub>2</sub>SO<sub>4</sub> to stratospheric temperatures, *J. Atmos. Chem.*, 21, 81–95, 1995.
- Hynes, A. J. and Wine, P. H.: The atmospheric chemistry of dimethylsulfoxide (DMSO) kinetics and mechanism of the OH + DMSO reaction, *J. Atmos. Chem.*, 24, 23–37, 1996.
- Ingham, T., Bauer, D., Sander, R., Crutzen, P. J., and Crowley, J. N.: Kinetics and products of the reactions BrO + DMS and Br + DMS at 298 K, *J. Phys. Chem. A*, 103, 7199–7209, 1999.
- Ip, H. S. S., Huang, X. H. H., and Yu, J. Z.: Effective Henry’s law constants of glyoxal, glyoxylic acid, and glycolic acid, *Geophys. Res. Lett.*, 36, L01802, doi:10.1029/2008GL036212, 2009.
- Jacob, D. J.: Chemistry of OH in remote clouds and its role in the production of formic acid and peroxy-monosulfate, *J. Geophys. Res.*, 91D, 9807–9826, 1986.
- Jacobi, H.-W.: Kinetische Untersuchungen und Modellrechnungen zur troposphärischen Chemie von Radikalanionen und Ozon in wäßriger Phase, Ph.D. thesis, Universität GH Essen, Germany, 1996.
- Jacobi, H.-W., Herrmann, H., and Zellner, R.: Kinetic investigation of the Cl<sub>2</sub><sup>-</sup> radical in the aqueous phase, in: *Air Pollution Research Report 57: Homogenous and heterogenous chemical Processes in the Troposphere*, edited by Mirabel, P., pp. 172–176, Office for official Publications of the European Communities, Luxembourg, 1996.
- Jagiella, S. and Zabel, F.: Reaction of phenylperoxy radicals with NO<sub>2</sub> at 298 K, *Phys. Chem. Chem. Phys.*, 9, 5036–5051, doi:10.1039/B705193J, 2007.
- Jayne, J. T., Duan, S. X., Davidovits, P., Worsnop, D. R., Zahniser, M. S., and Kolb, C. E.: Uptake of gas-phase alcohol and organic acid molecules by water surfaces, *J. Phys. Chem.*, 95, 6329–6336, 1991.
- Jefferson, A., Nicovich, J. M., and Wine, P. H.: Temperature-dependent kinetics studies of the reactions Br(<sup>2</sup>P<sub>3/2</sub>) + CH<sub>3</sub>SCH<sub>3</sub> ↔ CH<sub>3</sub>SCH<sub>2</sub> + HBr. Heat of formation of the CH<sub>3</sub>SCH<sub>2</sub> radical, *J. Phys. Chem.*, 98, 7128–7135, 1994.
- Jenkin, M., Saunders, S. M., and Pilling, M. J.: The tropospheric degradation of volatile organic compounds: A protocol for mechanism development, *Atmos. Environ.*, 31, 81–104, 1997.
- Jenkin, M. E., Young, J. C., and Rickard, A. R.: The MCM v3.3 degradation scheme for isoprene, *Atmos. Chem. Phys. Discuss.*, 15, 9709–9766, doi:10.5194/acpd-15-9709-2015, 2015.
- Jiang, P.-Y., Katsumura, Y., Nagaiishi, R., Domae, M., Ishikawa, K., Ishigure, K., and Yoshida, Y.: Pulse radiolysis study of concentrated sulfuric acid solutions. Formation mechanism, yield and reactivity of sulfate radicals, *J. Chem. Soc. Faraday Trans.*, 88, 1653–1658, 1992.
- Keller-Rudek, H., Koschel, D., Merlet, P., Ohms-Bredemann, U., Wagner, J., and Wietelmann, A.: *Gmelin Handbook of Inorganic and Organometallic Chemistry*, 8th Edition, Br, Bromine, Supplement Volume B2, Compounds with Oxygen and Nitrogen, Springer Verlag, Berlin, 1992.
- Kelley, C. M. and Tartar, H. V.: On the system: bromine-water, *J. Am. Chem. Soc.*, 78, 5752–5756, 1956.
- Kircher, C. C. and Sander, S. P.: Kinetics and mechanism of HO<sub>2</sub> and DO<sub>2</sub> disproportionations, *J. Phys. Chem.*, 88, 2082–2091, 1984.
- Kirchner, F., Mayer-Figge, A., Zabel, F., and Becker, K. H.: Thermal stability of peroxy-nitrates, *Int. J. Chem. Kinetics*, 31, 127–144, doi:10.1002/(SICI)1097-4601(1999)31:2<127::AID-KIN6>3.0.CO;2-L, 1999.
- Kleinböhl, A., Toon, G. C., Sen, B., Blavier, J.-F. L., Weisenstein, D. K., Strekowski, R. S., Nicovich, J. M., Wine, P. H., and Wennberg, P. O.: On the stratospheric chemistry of hydrogen cyanide, *Geophys. Res. Lett.*, 33, doi:10.1029/2006GL026015, 2006.
- Kohlmann, J.-P. and Poppe, D.: The tropospheric gas-phase degradation of NH<sub>3</sub> and its impact on the formation of N<sub>2</sub>O and NO<sub>x</sub>, *J. Atmos. Chem.*, 32, 397–415, 1999.
- Kondo, O. and Benson, S. W.: Kinetics and equilibria in the system Br + CH<sub>3</sub>OOH ⇌ HBr + CH<sub>3</sub>OO. An upper limit for the heat of formation of the methylperoxy radical, *J. Phys. Chem.*, 88, 6675–6680, 1984.

- Kumar, K. and Margerum, D. W.: Kinetics and mechanism of general-acid-assisted oxidation of bromide by hypochlorite and hypochlorous acid, *Inorg. Chem.*, 26, 2706–2711, 1987.
- Lax, E.: Taschenbuch für Chemiker und Physiker, Springer Verlag, Berlin, 1969.
- Lee, Y.-N. and Schwartz, S. E.: Reaction kinetics of nitrogen dioxide with liquid water at low partial pressure, *J. Phys. Chem.*, 85, 840–848, 1981.
- Lengyel, I., Li, J., Kustin, K., and Epstein, I. R.: Rate constants for reactions between iodine- and chlorine-containing species: A detailed mechanism of the chlorine dioxide/chlorite reaction, *J. Am. Chem. Soc.*, 118, 3708–3719, 1996.
- Lewis, T. R., Blitz, M. A., Heard, D. E., and Seakins, P. W.: Direct evidence for a substantive reaction between the Criegee intermediate,  $\text{CH}_2\text{OO}$ , and the water vapour dimer, *Phys. Chem. Chem. Phys.*, 17, 4859–4863, doi:10.1039/C4CP04750H, 2015.
- Liljegren, J. A. and Stevens, P. S.: Measurements of the kinetics of the reaction of OH radicals with 3-methylfuran at low pressure, *Int. J. Chem. Kinetics*, 45, 787–794, 2013.
- Lin, C.-J. and Pehkonen, S. O.: Aqueous free radical chemistry of mercury in the presence of iron oxides and ambient aerosol, *Atmos. Environ.*, 31, 4125–4137, 1997.
- Lin, C.-J. and Pehkonen, S. O.: Oxidation of elemental mercury by aqueous chlorine ( $\text{HOCl}/\text{OCl}^-$ ): Implications for tropospheric mercury chemistry, *J. Geophys. Res.*, 103D, 28 093–28 102, 1998.
- Lind, J. A. and Kok, G. L.: Correction to “Henry’s law determinations for aqueous solutions of hydrogen peroxide, methylhydroperoxide, and peroxyacetic acid” by John A. Lind and Gregory L. Kok, *J. Geophys. Res.*, 99D, 21 119, 1994.
- Lind, J. A., Lazrus, A. L., and Kok, G. L.: Aqueous phase oxidation of sulfur(IV) by hydrogen peroxide, methylhydroperoxide, and peroxyacetic acid, *J. Geophys. Res.*, 92D, 4171–4177, 1987.
- Liu, Q. and Margerum, D. W.: Equilibrium and kinetics of bromine chloride hydrolysis, *Environ. Sci. Technol.*, 35, 1127–1133, 2001.
- Liu, Y., Pimentel, A. S., Antoku, Y., Giles, B. J., and Barker, J. R.: Temperature-dependent rate and equilibrium constants for  $\text{Br}\cdot(\text{aq}) + \text{Br}^-(\text{aq}) \rightleftharpoons \text{Br}_2^-(\text{aq})$ , *J. Phys. Chem. A*, 106, 11 075–11 082, 2002.
- Lockhart, J., Blitz, M., Heard, D., Seakins, P., and Shannon, R.: Kinetic study of the OH + glyoxal reaction: experimental evidence and quantification of direct OH recycling, *J. Phys. Chem. A*, 117, 11 027–11 037, doi:10.1021/jp4076806, 2013.
- Lockwood, A. L., Shepson, P. B., Fiddler, M. N., and Alaghmand, M.: Isoprene nitrates: preparation, separation, identification, yields, and atmospheric chemistry, *Atmos. Chem. Phys.*, 10, 6169–6178, doi:10.5194/acp-10-6169-2010, 2010.
- Logager, T., Sehested, K., and Holcman, J.: Rate constants of the equilibrium reactions  $\text{SO}_4 + \text{HNO}_3 \rightleftharpoons \text{HSO}_4^- + \text{NO}_3$  and  $\text{SO}_4 + \text{NO}_3 \rightleftharpoons \text{SO}_4^{2-} + \text{NO}_3$ , *Radiat. Phys. Chem.*, 41, 539–543, 1993.
- Long, C. A. and Bielski, B. H. J.: Rate of reaction of superoxide radical with chloride-containing species, *J. Phys. Chem.*, 84, 555–557, 1980.
- Magi, L., Schweitzer, F., Pallares, C., Cherif, S., Mirabel, P., and George, C.: Investigation of the uptake rate of ozone and methyl hydroperoxide by water surfaces, *J. Phys. Chem. A*, 101, 4943–4949, 1997.
- Manion, J. A., Huie, R. E., Levin, R. D., Burgess, Jr., D. R., Orkin, V. L., Tsang, W., McGivern, W. S., Hudgens, J. W., Knyazev, V. D., Atkinson, D. B., Chai, E., Tereza, A. M., Lin, C.-Y., Allison, T. C., Mallard, W. G., Westley, F., Heron, J. T., Hampson, R. F., and Frizzell, D. H.: NIST Chemical Kinetics Database (Web Version), <http://kinetics.nist.gov>, 2010.
- Margerum, D. W., Dickson, P. N., Nagy, J. C., Kumar, K., Bowers, C. P., and Fogelman, K. D.: Kinetics of the iodine monochloride reaction with iodide measured by the pulsed-accelerated-flow method, *Inorg. Chem.*, 25, 4900–4904, 1986.
- Marsh, A. R. W. and McElroy, W. J.: The dissociation constant and Henry’s law constant of HCl in aqueous solution, *Atmos. Environ.*, 19, 1075–1080, 1985.
- Martin, L. R. and Damschen, D. E.: Aqueous oxidation of sulfur dioxide by hydrogen peroxide at low pH, *Atmos. Environ.*, 15, 1615–1621, 1981.
- Matthew, B. M., George, I., and Anastasio, C.: Hydroperoxyl radical ( $\text{HO}_2\cdot$ ) oxidizes dibromide radical anion ( $-\text{Br}_2^-$ ) to bromine ( $\text{Br}_2$ ) in aqueous solution: Implications for the formation of  $\text{Br}_2$  in the marine boundary layer, *Geophys. Res. Lett.*, 30, doi:10.1029/2003GL018572, 2003.
- McCabe, D. C., Gierczak, T., Talukdar, R. K., and Ravishankara, A. R.: Kinetics of the reaction  $\text{OH} + \text{CO}$  under atmospheric conditions, *Geophys. Res. Lett.*, 28, 3135–3138, 2001.

- Mellouki, A. and Mu, Y.: On the atmospheric degradation of pyruvic acid in the gas phase, *J. Photochem. Photobiol. A: Chem.*, 157, doi:10.1016/S1010-6030(03)00070-4, 2003.
- Messaadia, L., Dib, G. E., Ferhati, A., and Chakir, A.: UV-visible spectra and gas-phase rate coefficients for the reaction of 2,3-pentanedione and 2,4-pentanedione with OH radicals, *Chem. Phys. Lett.*, 626, 73–79, doi:10.1016/j.cplett.2015.02.032, 2015.
- Mössinger, J. C. and Cox, R. A.: Heterogeneous reaction of HOI with sodium halide salts, *J. Phys. Chem. A*, 105, 5165–5177, 2001.
- Müller, J.-F., Peeters, J., and Stavrou, T.: Fast photolysis of carbonyl nitrates from isoprene, *Atmos. Chem. Phys.*, 14, 2497–2508, doi:10.5194/acp-14-2497-2014, 2014.
- Munger, J. W., Jacob, D. J., Fan, S.-M., Colman, A. S., and Dibb, J. E.: Concentrations and snow-atmosphere fluxes of reactive nitrogen at Summit, Greenland, *J. Geophys. Res.*, 104D, 13 721–13 734, 1999.
- Munthe, J.: The aqueous oxidation of elemental mercury by ozone, *Atmos. Environ.*, 26A, 1461–1468, 1992.
- Nagy, J. C., Kumar, K., and Margerum, D. W.: Non-metal redox kinetics: Oxidation of iodide by hypochlorous acid and by nitrogen trichloride measured by the pulsed-accelerated-flow method, *Inorg. Chem.*, 27, 2773–2780, 1988.
- Nakanishi, H., Morita, H., and Nagakura, S.: Electronic structures and spectra of the keto and enol forms of acetylacetone, *Bull. Chem. Soc. Jpn.*, 50, 2255–2261, doi:10.1246/bcsj.50.2255, 1977.
- Nakano, Y., Ishiwata, T., and Kawasaki, M.: Rate constants of the reaction of NO<sub>3</sub> with CH<sub>3</sub>I measured with use of cavity ring-down spectroscopy, *J. Phys. Chem. A*, 109, 6527–6531, 2005.
- Neta, P. and Huie, R. E.: Rate constants for reactions of NO<sub>3</sub> radicals in aqueous solutions, *J. Phys. Chem.*, 90, 4644–4648, 1986.
- Nguyen, T. L., Peeters, J., and Vereecken, L.: Theoretical study of the gas-phase ozonolysis of  $\beta$ -pinene (C<sub>10</sub>H<sub>16</sub>), *Phys. Chem. Chem. Phys.*, 11, 5643–5656, doi:10.1039/b822984h, 2009.
- Nielsen, O. J., Sidebottom, H. W., Donlon, M., and Treacy, J.: Rate constants for the gas-phase reactions of OH radicals and Cl atoms with n-alkyl nitrites at atmospheric pressure and 298 K, *Int. J. Chem. Kinetics*, 23, 1095–1109, doi:10.1002/kin.550231204, 1991.
- Ogryzlo, E. A., Paltenghi, R., and Bayes, K. D.: The rate of reaction of methyl radicals with ozone, *Int. J. Chem. Kinetics*, 13, 667–675, doi:10.1002/kin.550130707, 1981.
- Olzmann, M., Kraka, E., Cremer, D., Gutbrod, R., and Andersson, S.: Energetics, kinetics, and product distributions of the reactions of ozone with ethene and 2,3-dimethyl-2-butene, *J. Phys. Chem. A*, 101, 9421–9429, 1997.
- Orlando, J. J. and Tyndall, G. S.: Rate coefficients for the thermal decomposition of BrONO<sub>2</sub> and the heat of formation of BrONO<sub>2</sub>, *J. Phys. Chem.*, 100, 19 398–19 405, 1996.
- Orlando, J. J. and Tyndall, G. S.: The atmospheric chemistry of the HC(O)CO radical, *Int. J. Chem. Kinetics*, 33, 149–156, 2001.
- Orlando, J. J. and Tyndall, G. S.: Laboratory studies of organic peroxy radical chemistry: an overview with emphasis on recent issues of atmospheric significance, *Chem. Soc. Rev.*, 41, 6294–6317, doi:10.1039/C2CS35166H, 2012.
- Orlando, J. J., Tyndall, G. S., Bilde, M., Ferronato, C., Wallington, T. J., Vereecken, L., and Peeters, J.: Laboratory and theoretical study of the oxy radicals in the OH- and Cl-initiated oxidation of ethene, *J. Phys. Chem. A*, 102, 8116–8123, 1998.
- Orlando, J. J., Tyndall, G. S., Fracheboud, J. M., Estupinan, E. G., Haberkorn, S., and Zimmer, A.: The rate and mechanism of the gas-phase oxidation of hydroxyacetone, *Atmos. Environ.*, 33, 1621–1629, 1999a.
- Orlando, J. J., Tyndall, G. S., and Paulson, S. E.: Mechanism of the OH-initiated oxidation of methacrolein, *Geophys. Res. Lett.*, 26, 2191–2194, 1999b.
- Orlando, J. J., Tyndall, G. S., Bertman, S. B., Chen, W., and Burkholder, J. B.: Rate coefficient for the reaction of OH with CH<sub>2</sub>=C(CH<sub>3</sub>)C(O)OONO<sub>2</sub> (MPAN), *Atmos. Environ.*, 36, 1895–1900, 2002.
- Ouyang, B., McLeod, M. W., Jones, R. L., and Bloss, W. J.: NO<sub>3</sub> radical production from the reaction between the Criegee intermediate CH<sub>2</sub>OO and NO<sub>2</sub>, *Phys. Chem. Chem. Phys.*, 15, 17 070–17 075, doi:10.1039/c3cp53024h, 2013.
- Pal, B. and Ariya, P. A.: Gas-phase HO-initiated reactions of elemental mercury: Kinetics, product studies, and atmospheric implications, *Environ. Sci. Technol.*, 38, 5555–5566, 2004.

- Palmer, D. A., Ramette, R. W., and Mesmer, R. E.: The hydrolysis of iodine: Equilibria at high temperatures, *J. Nucl. Mater.*, 130, 280–286, 1985.
- Paulot, F., Crounse, J. D., Kjaergaard, H. G., Kroll, J. H., Seinfeld, J. H., and Wennberg, P. O.: Isoprene photooxidation: new insights into the production of acids and organic nitrates, *Atmos. Chem. Phys.*, 9, 1479–1501, 2009a.
- Paulot, F., Crounse, J. D., Kjaergaard, H. G., Kürten, A., St. Clair, J. M., Seinfeld, J. H., and Wennberg, P. O.: Unexpected epoxide formation in the gas-phase photooxidation of isoprene, *Science*, 325, doi:10.1126/science.1172910, 2009b.
- Paulot, F., Wunch, D., Crounse, J. D., Toon, G. C., Millet, D. B., DeCarlo, P. F., Vigouroux, C., Deutscher, N. M., González Abad, G., Notholt, J., Warneke, T., Hannigan, J. W., Warneke, C., de Gouw, J. A., Dunlea, E. J., De Mazière, M., Griffith, D. W. T., Bernath, P., Jimenez, J. L., and Wennberg, P. O.: Importance of secondary sources in the atmospheric budgets of formic and acetic acids, *Atmos. Chem. Phys.*, 11, 1989–2013, doi:10.5194/acp-11-1989-2011, 2011.
- Peeters, J. and Nguyen, T. L.: Unusually fast 1,6-H shifts of enolic hydrogens in peroxy radicals: formation of the first-generation C<sub>2</sub> and C<sub>3</sub> carbonyls in the oxidation of isoprene, *J. Phys. Chem. A*, 116, 6134–6141, doi:10.1021/jp211447q, 2012.
- Peeters, J., Müller, J.-F., Stavrou, T., and Nguyen, V. S.: Hydroxyl radical recycling in isoprene oxidation driven by hydrogen bonding and hydrogen tunneling: the upgraded LIM1 mechanism, *J. Phys. Chem. A*, 118, 8625–8643, doi:10.1021/jp5033146, 2014.
- Plane, J. M. C., Joseph, D. M., Allan, B. J., Ashworth, S. H., and Francisco, J. S.: An experimental and theoretical study of the reactions OIO + NO and OIO + OH, *J. Phys. Chem. A*, 110, 93–100, 2006.
- Platz, J., Nielsen, O. J., Wallington, T. J., Ball, J. C., Hurley, M. D., Straccia, A. M., Schneider, W. F., and Sehested, J.: Atmospheric chemistry of the phenoxy radical, C<sub>6</sub>H<sub>5</sub>O(·): UV spectrum and kinetics of its reaction with NO, NO<sub>2</sub>, and O<sub>2</sub>, *J. Phys. Chem. A*, 102, 7964–7974, doi:10.1021/jp9822211, 1998.
- Pleijel, K. and Munthe, J.: Modelling the atmospheric mercury cycle — Chemistry in fog droplets, *Atmos. Environ.*, 29, 1441–1457, 1995.
- Ponche, J. L., George, C., and Mirabel, P.: Mass transfer at the air/water interface: Mass accommodation coefficients of SO<sub>2</sub>, HNO<sub>3</sub>, NO<sub>2</sub> and NH<sub>3</sub>, *J. Atmos. Chem.*, 16, 1–21, 1993.
- Pöschl, U., Canagaratna, M., Jayne, J. T., Molina, L. T., Worsnop, D. R., Kolb, C. E., and Molina, M. J.: Mass accommodation coefficient of H<sub>2</sub>SO<sub>4</sub> vapor on aqueous sulfuric acid surfaces and gaseous diffusion coefficient of H<sub>2</sub>SO<sub>4</sub> in N<sub>2</sub>/H<sub>2</sub>O, *J. Phys. Chem. A*, 102, 10 082–10 089, 1998.
- Raofie, F. and Ariya, P. A.: Kinetics and products study of the reaction of BrO radicals with gaseous mercury, *J. Phys. IV France*, 107, 1119–1121, 2003.
- Raofie, F. and Ariya, P. A.: Product study of the gas-phase BrO-initiated oxidation of Hg<sup>0</sup>: Evidence for stable Hg<sup>1+</sup> compounds, *Environ. Sci. Technol.*, 38, 4319–4326, 2004.
- Régimbal, J.-M. and Mozurkewich, M.: Peroxynitric acid decay mechanisms and kinetics at low pH, *J. Phys. Chem. A*, 101, 8822–8829, 1997.
- Rickard, A. and Pascoe, S.: The Master Chemical Mechanism (MCM), <http://mcm.leeds.ac.uk>, 2009.
- Rickard, A. R., Johnson, D., McGill, C. D., and Marston, G.: OH yields in the gas-phase reactions of ozone with alkenes, *J. Phys. Chem. A*, 103, 7656–7664, 1999.
- Roble, R. G.: Energetics of the mesosphere and thermosphere, in: *The upper Mesosphere and Lower Thermosphere: A Review of Experiment and Theory*, Geophysical Monograph 87, edited by Johnson, R. M. and Killeen, T. L., pp. 1–23, American Geophysical Union, Washington, DC, USA, 1995.
- Ross, A. B., Mallard, W. G., Helman, W. P., Bielski, B. H. J., Buxton, G. V., Cabelli, D. E., Greenstock, C. L., Huie, R. E., and Neta, P.: NDRL-NIST Solution Kinetics Database: - Ver. 1, National Institute of Standards and Technology, Gaithersburg, MD, 1992.
- Roth, E., Chakir, A., and Ferhati, A.: Study of a benzoylperoxy radical in the gas phase: ultraviolet spectrum and C<sub>6</sub>H<sub>5</sub>C(O)O<sub>2</sub> + HO<sub>2</sub> reaction between 295 and 357 K, *J. Phys. Chem. A*, 114, 10 367–10 379, doi:10.1021/jp1021467, 2010.
- Rudich, Y., Talukdar, R. K., Imamura, T., Fox, R. W., and Ravishankara, A. R.: Uptake of NO<sub>3</sub> on KI solutions: Rate coefficient for the NO<sub>3</sub> + I<sup>-</sup> reaction and gas-phase diffusion coefficients for NO<sub>3</sub>, *Chem. Phys. Lett.*, 261, 467–473, 1996.
- Saastad, O. W., Ellermann, T., and Nielsen, C. J.: On the adsorption of NO and NO<sub>2</sub> on cold H<sub>2</sub>O/H<sub>2</sub>SO<sub>4</sub> surfaces, *Geophys. Res. Lett.*, 20, 1191–1193, 1993.
- Sander, R., Jöckel, P., Kirner, O., Kunert, A. T., Landgraf, J., and Pozzer, A.: The photolysis module



- JVAL-14, compatible with the MESSy standard, and the JVal PreProcessor (JVPP), Geosci. Model Dev., 7, 2653–2662, <http://www.geosci-model-dev.net/7/2653>, 2014.
- Sander, S. P., Finlayson-Pitts, B. J., Friedl, R. R., Golden, D. M., Huie, R. E., Kolb, C. E., Kurylo, M. J., Molina, M. J., Moortgat, G. K., Orkin, V. L., and Ravishankara, A. R.: Chemical Kinetics and Photochemical Data for Use in Atmospheric Studies, Evaluation Number 14, JPL Publication 02-25, Jet Propulsion Laboratory, Pasadena, CA, 2003.
- Sander, S. P., Friedl, R. R., Golden, D. M., Kurylo, M. J., Moortgat, G. K., Keller-Rudek, H., Wine, P. H., Ravishankara, A. R., Kolb, C. E., Molina, M. J., Finlayson-Pitts, B. J., Huie, R. E., and Orkin, V. L.: Chemical Kinetics and Photochemical Data for Use in Atmospheric Studies, Evaluation Number 15, JPL Publication 06-2, Jet Propulsion Laboratory, Pasadena, CA, <http://jpldataeval.jpl.nasa.gov>, 2006.
- Sander, S. P., Abbatt, J., Barker, J. R., Burkholder, J. B., Friedl, R. R., Golden, D. M., Huie, R. E., Kolb, C. E., Kurylo, M. J., Moortgat, G. K., Orkin, V. L., and Wine, P. H.: Chemical Kinetics and Photochemical Data for Use in Atmospheric Studies, Evaluation No. 17, JPL Publication 10-6, Jet Propulsion Laboratory, Pasadena, <http://jpldataeval.jpl.nasa.gov>, 2011.
- Schroeder, W. H. and Munthe, J.: Atmospheric mercury — An overview, Atmos. Environ., 32, 809–822, 1998.
- Schwartz, S. E. and White, W. H.: Solubility equilibria of the nitrogen oxides and oxyacids in dilute aqueous solution, in: Advances in Environmental Science and Engineering, edited by Pfafflin, J. R. and Ziegler, E. N., vol. 4, pp. 1–45, Gordon and Breach Science Publishers, NY, 1981.
- Schwarz, H. A. and Bielski, B. H. J.: Reactions of HO<sub>2</sub> and O<sub>2</sub><sup>-</sup> with iodine and bromine and the I<sub>2</sub><sup>-</sup> and I atom reduction potentials, J. Phys. Chem., 90, 1445–1448, 1986.
- Schweitzer, F., Mirabel, P., and George, C.: Uptake of hydrogen halides by water droplets, J. Phys. Chem. A, 104, 72–76, 2000.
- Scribano, Y., Goldman, N., Saykally, R. J., and Leforestier, C.: Water dimers in the atmosphere III: Equilibrium constant from a flexible potential, J. Phys. Chem. A, 110, 5411–5419, doi:10.1021/jp056759k, 2006.
- Sehested, J., Christensen, L. K., Nielsen, O. J., Bilde, M., Wallington, T. J., Schneider, W. F., Orlando, J. J., and Tyndall, G. S.: Atmospheric chemistry of acetone: Kinetic study of the CH<sub>3</sub>C(O)CH<sub>2</sub>O<sub>2</sub> + NO/NO<sub>2</sub> reactions and decomposition of CH<sub>3</sub>C(O)CH<sub>2</sub>O<sub>2</sub>NO<sub>2</sub>, Int. J. Chem. Kinetics, 30, 475–489, doi:10.1002/(SICI)1097-4601(1998)30:7<475::AID-KIN4>3.0.CO;2-P, 1998.
- Sehested, K., Rasmussen, O. L., and Fricke, H.: Rate constants of OH with HO<sub>2</sub>, O<sub>2</sub><sup>-</sup>, and H<sub>2</sub>O<sub>2</sub><sup>+</sup> from hydrogen peroxide formation in pulse-irradiated oxygenated water, J. Phys. Chem., 72, 626–631, 1968.
- Sehested, K., Holcman, J., and Hart, E. J.: Rate constants and products of the reactions of e<sub>aq</sub><sup>-</sup>, O<sub>2</sub><sup>-</sup> and H with ozone in aqueous solutions, J. Phys. Chem., 87, 1951–1954, 1983.
- Seinfeld, J. H. and Pandis, S. N.: Atmospheric Chemistry and Physics, John Wiley & Sons, Inc., 1998.
- Shallcross, D. E., Leather, K. E., Bacak, A., Xiao, P., Lee, E. P. F., Ng, M., Mok, D. K. W., Dyke, J. M., Hossaini, R., Chipperfield, M. P., Khan, M. A. H., and Percival, C. J.: Reaction between CH<sub>3</sub>O<sub>2</sub> and BrO radicals: a new source of upper troposphere lower stratosphere hydroxyl radicals, J. Phys. Chem. A, 119, 4618–4632, 2015.
- Shon, Z.-H., Kim, K.-H., Kim, M.-Y., and Lee, M.: Modeling study of reactive gaseous mercury in the urban air, Atmos. Environ., 39, 749–761, 2005.
- Shoute, L. C. T., Alfassi, Z. B., Neta, P., and Huie, R. E.: Temperature dependence of the rate constants for reaction of dihalide and azide radicals with inorganic reductants, J. Phys. Chem., 95, 3238–3242, 1991.
- Sivakumaran, V., Hölscher, D., Dillon, T. J., and Crowley, J. N.: Reaction between OH and HCHO: temperature dependent rate coefficients (202–399 K) and product pathways (298 K), Phys. Chem. Chem. Phys., 5, 4821–4827, 2003.
- Snider, J. R. and Dawson, G. A.: Tropospheric light alcohols, carbonyls, and acetonitrile: Concentrations in the southwestern United States and Henry’s law data, J. Geophys. Res., 90D, 3797–3805, 1985.
- So, S., Wille, U., and da Silva, G.: Atmospheric chemistry of enols: a theoretical study of the vinyl alcohol + OH + O<sub>2</sub> reaction mechanism, Environ. Sci. Technol., 48, 6694–6701, doi:10.1021/es500319q, 2014.
- Sokolov, O., Hurley, M. D., Ball, J. C., Wallington, T. J., Nelsen, W., Barnes, I., and Becker, K. H.: Kinetics of the reactions of chlorine atoms with CH<sub>3</sub>ONO and CH<sub>3</sub>ONO<sub>2</sub>, Int. J. Chem. Kinetics, 31, 357–359, 1999.

- Solberg, S., Stordal, F., and Hov, Ø.: Tropospheric ozone at high latitudes in clean and polluted air masses, a climatological study, *J. Atmos. Chem.*, 28, 111–123, 1997.
- Staudinger, J. and Roberts, P. V.: A critical compilation of Henry’s law constant temperature dependence relations for organic compounds in dilute aqueous solutions, *Chemosphere*, 44, 561–576, 2001.
- Stone, D., Blitz, M., Daubney, L., Howes, N. U. M., and Seakins, P.: Kinetics of CH<sub>2</sub>OO reactions with SO<sub>2</sub>, NO<sub>2</sub>, NO, H<sub>2</sub>O and CH<sub>3</sub>CHO as a function of pressure, *Phys. Chem. Chem. Phys.*, 16, 1139–1149, doi:10.1039/c3cp54391a, 2014.
- Strekowski, R. S., Nicovich, J. M., and Wine, P. H.: Kinetic and mechanistic study of the Reactions of O(<sup>1</sup>D<sub>2</sub>) with HCN and CH<sub>3</sub>CN, *Chem. Phys. Chem.*, 11, 3942–3955, doi:10.1002/cphc.201000550, 2010.
- Sutton, H. C. and Downes, M. T.: Reactions of the HO<sub>2</sub> radical in aqueous solution with bromine and related compounds, *J. Chem. Soc. Faraday Trans. 1*, 68, 1498–1507, 1972.
- Swaminathan, P. K., Strobel, D. F., Kupperman, D. G., Acton, L., DeMajistre, R., Yee, J.-H., Paxton, L., Anderson, D. E., Strickland, D. J., and Duff, J. W.: Nitric oxide abundance in the mesosphere/lower thermosphere region: Roles of solar soft X rays, suprathreshold N(<sup>4</sup>S) atoms, and vertical transport, *J. Geophys. Res.*, 103A, 11 579–11 594, 1998.
- T. J. Wallington et al.: IUPAC Task group on atmospheric chemical kinetic data evaluation: Evaluated kinetic data, <http://iupac.pole-ether.fr>, 2014.
- Takami, A., Kato, S., Shimono, A., and Koda, S.: Uptake coefficient of OH radical on aqueous surface, *Chem. Phys.*, 231, 215–227, 1998.
- Tao, Z. and Li, Z.: A kinetics study on reactions of C<sub>6</sub>H<sub>5</sub>O with C<sub>6</sub>H<sub>5</sub>O and O<sub>3</sub> at 298 K, *Int. J. Chem. Kinetics*, 31, 65–72, doi:10.1002/(SICI)1097-4601(1999)31:1(65::AID-KIN8)3.0.CO;2-J, 1999.
- Taraborrelli, D.: Isoprene oxidation and its impacts on the atmospheric composition, Ph.D. thesis, Johannes Gutenberg-Universität, Mainz, Germany, <http://d-nb.info/1003538770/34>, 2010.
- Taraborrelli, D.: The Mainz Organics Mechanism (MOM), *Geosci. Model Dev.*, (in preparation), 2016.
- Taraborrelli, D., Lawrence, M. G., Butler, T. M., Sander, R., and Lelieveld, J.: Mainz Isoprene Mechanism 2 (MIM2): an isoprene oxidation mechanism for regional and global atmospheric modelling, *Atmos. Chem. Phys.*, 9, 2751–2777, <http://www.atmos-chem-phys.net/9/2751>, 2009.
- Thomas, K., Volz-Thomas, A., and Kley, D.: Zur Wechselwirkung von NO<sub>3</sub>-Radikalen mit wässrigen Lösungen: Bestimmung des Henry- und des Massenakkommodationskoeffizienten, Ph.D. thesis, Institut für Chemie und Dynamik der Geosphäre 2, Forschungszentrum Jülich GmbH, Germany, 1993.
- Thornton, J. and Abbatt, J. P. D.: Measurements of HO<sub>2</sub> uptake to aqueous aerosol: Mass accommodation coefficients and net reactive loss, *J. Geophys. Res.*, 110D, doi:10.1029/2004JD005402, 2005.
- Tokos, J. J. S., Hall, B., Calhoun, J. A., and Prestbo, E. M.: Homogeneous gas-phase reaction of Hg<sup>0</sup> with H<sub>2</sub>O<sub>2</sub>, O<sub>3</sub>, CH<sub>3</sub>I, and (CH<sub>3</sub>)<sub>2</sub>S: Implications for atmospheric Hg cycling, *Atmos. Environ.*, 32, 823–827, 1998.
- Troy, R. C. and Margerum, D. W.: Non-metal redox kinetics: Hypobromite and hypobromous acid reactions with iodide and with sulfite and the hydrolysis of bromosulfate, *Inorg. Chem.*, 30, 3538–3543, 1991.
- Troy, R. C., Kelley, M. D., Nagy, J. C., and Margerum, D. W.: Non-metal redox kinetics: Iodine monobromide reaction with iodide ion and the hydrolysis of IBr, *Inorg. Chem.*, 30, 4838–4845, 1991.
- Tyndall, G. S., Staffelbach, T. A., Orlando, J. J., and Calvert, J. G.: Rate coefficients for the reactions of OH radicals with methylglyoxal and acetaldehyde, *Int. J. Chem. Kinetics*, 27, 1009–1020, 1995.
- Tyndall, G. S., Orlando, J. J., Wallington, T. J., Sehested, J., and Nielsen, O. J.: Kinetics of the reactions of acetonitrile with chlorine and fluorine atoms, *J. Phys. Chem.*, 100, 660–668, doi:10.1021/jp9521417, 1996.
- Tyndall, G. S., Cox, R. A., Granier, C., Lesclaux, R., Moortgat, G. K., Pilling, M. J., Ravishankara, A. R., and Wallington, T. J.: The atmospheric chemistry of small organic peroxy radicals, *J. Geophys. Res.*, 106D, 12 157–12 182, 2001a.
- Tyndall, G. S., Orlando, J. J., Wallington, T. J., and Hurley, M. D.: Products of the chlorine-atom- and hydroxyl-radical-initiated oxidation of CH<sub>3</sub>CN, *J. Phys. Chem. A*, 105, 5380–5384, doi:10.1021/jp004318p, 2001b.
- van den Bergh, H. and Troe, J.: Kinetic and thermodynamic properties of INO and INO<sub>2</sub> intermediate complexes in iodine recombination, *J. Chem. Phys.*, 64, 736–742, 1976.

- van Loon, L., Mader, E., and Scott, S. L.: Reduction of the aqueous mercuric ion by sulfite: UV spectrum of  $\text{HgSO}_3$  and its intramolecular redox reaction, *J. Phys. Chem. A*, 104, 1621–1626, 2000.
- van Loon, L. L., Mader, E. A., and Scott, S. L.: Sulfite stabilization and reduction of the aqueous mercuric ion: Kinetic determination of sequential formation constants, *J. Phys. Chem. A*, 105, 3190–3195, 2001.
- Vereecken, L. and Francisco, J. S.: Theoretical studies of atmospheric reaction mechanisms in the troposphere, *Chem. Soc. Rev.*, 41, 6259–6293, doi:10.1039/c2cs35070j, 2012.
- Vereecken, L. and Peeters, J.: A theoretical study of the OH-initiated gas-phase oxidation mechanism of  $\beta$ -pinene ( $\text{C}_{10}\text{H}_{16}$ ): first generation products, *Phys. Chem. Chem. Phys.*, 14, 3802–3815, doi:10.1039/c2cp23711c, 2012.
- Vereecken, L., Müller, J.-F., and Peeters, J.: Low-volatility poly-oxygenates in the OH-initiated atmospheric oxidation of  $\alpha$ -pinene: impact of non-traditional peroxy radical chemistry, *Phys. Chem. Chem. Phys.*, 9, 5241–5248, doi:10.1039/b708023a, 2007.
- Vereecken, L., Harder, H., and Novelli, A.: The reaction of Criegee intermediates with  $\text{NO}$ ,  $\text{RO}_2$ , and  $\text{SO}_2$ , and their fate in the atmosphere, *Phys. Chem. Chem. Phys.*, 14, 14682–14695, doi:10.1039/c2cp42300f, 2012.
- Vereecken, L., Harder, H., and Novelli, A.: The reactions of Criegee intermediates with alkenes, ozone, and carbonyl oxides, *Phys. Chem. Chem. Phys.*, 16, 4039–4049, doi:10.1039/c3cp54514h, 2014.
- von Glasow, R., Sander, R., Bott, A., and Crutzen, P. J.: Modeling halogen chemistry in the marine boundary layer, 1. Cloud-free MBL, *J. Geophys. Res.*, 107D, 4341, doi:10.1029/2001JD000942, 2002.
- von Kuhlmann, R.: Tropospheric photochemistry of ozone, its precursors and the hydroxyl radical: A 3D-modeling study considering non-methane hydrocarbons, Ph.D. thesis, Johannes Gutenberg-Universität, Mainz, Germany, 2001.
- von Kuhlmann, R., Lawrence, M. G., Crutzen, P. J., and Rasch, P. J.: A model for studies of tropospheric ozone and nonmethane hydrocarbons: Model description and ozone results, *J. Geophys. Res.*, 108D, 4294, doi:10.1029/2002JD002893, 2003.
- Wagman, D. D., Evans, W. H., Parker, V. B., Schumm, R. H., Halow, I., Bailey, S. M., Churney, K. L., and Nuttall, R. L.: The NBS tables of chemical thermodynamic properties; Selected values for inorganic and  $\text{C}_1$  and  $\text{C}_2$  organic substances in SI units, *J. Phys. Chem. Ref. Data*, 11, suppl. 2, 1982.
- Wagner, I. and Strehlow, H.: On the flash photolysis of bromide ions in aqueous solution, *Ber. Bunsenges. Phys. Chem.*, 91, 1317–1321, 1987.
- Wallington, T. J., Ammann, M., Cox, R. A., Crowley, J. N., Jenkin, M. E., Mellouki, A., Rossi, M. J., Troe, J., and Cox, B.: IUPAC task group on atmospheric chemical kinetic data evaluation, <http://iupac.pole-ether.fr>.
- Wang, T. X. and Margerum, D. W.: Kinetics of reversible chlorine hydrolysis: Temperature dependence and general-acid/base-assisted mechanisms, *Inorg. Chem.*, 33, 1050–1055, 1994.
- Wang, T. X., Kelley, M. D., Cooper, J. N., Beckwith, R. C., and Margerum, D. W.: Equilibrium, kinetic, and UV-spectral characteristics of aqueous bromine chloride, bromine, and chlorine species, *Inorg. Chem.*, 33, 5872–5878, 1994.
- Wang, Y. L., Nagy, J. C., and Margerum, D. W.: Kinetics of hydrolysis of iodine monochloride measured by the pulsed-accelerated-flow method, *J. Am. Chem. Soc.*, 111, 7838–7844, 1989.
- Wang, Z. and Pehkonen, S. O.: Oxidation of elemental mercury by aqueous bromine: atmospheric implications, *Atmos. Environ.*, 38, 3675–3688, 2004.
- Warneck, P.: Chemical reactions in clouds, *Fresenius J. Anal. Chem.*, 340, 585–590, 1991.
- Warneck, P.: The relative importance of various pathways for the oxidation of sulfur dioxide and nitrogen dioxide in sunlit continental fair weather clouds, *Phys. Chem. Chem. Phys.*, 1, 5471–5483, 1999.
- Wayne, R. P., Barnes, I., Biggs, P., Burrows, J. P., Canosa-Mas, C. E., Hjorth, J., Le Bras, G., Moortgat, G. K., Perner, D., Poulet, G., Restelli, G., and Sidebottom, H.: The nitrate radical: Physics, chemistry, and the atmosphere, *Atmos. Environ.*, 25A, 1–203, 1991.
- Weast, R. C., ed.: *CRC Handbook of Chemistry and Physics*, 61st Edition, CRC Press, Inc., Boca Raton, FL, 1980.
- Weinstein-Lloyd, J. and Schwartz, S. E.: Low-intensity radiolysis study of free-radical reactions in cloudwater:  $\text{H}_2\text{O}_2$  production and destruction, *Environ. Sci. Technol.*, 25, 791–800, 1991.
- Welz, O., Savee, J. D., Osborn, D. L., Vasu, S. S., Percival, C. J., Shallcross, D. E., and Taatjes, C. A.: Direct kinetic measurements of Criegee intermediate ( $\text{CH}_2\text{OO}$ ) formed by reaction of  $\text{CH}_2\text{I}$  with  $\text{O}_2$ , *Science*, 335, 204–207, doi:10.1126/science.1213229, 2012.

- Welz, O., Eskola, A. J., Sheps, L., Rotavera, B., Savee, J. D., Scheer, A. M., Osborn, D. L., Lowe, D., Booth, A. M., Xiao, P., Khan, M. A. H., Percival, C. J., Shallcross, D. E., and Taatjes, C. A.: Rate coefficients of C1 and C2 Criegee intermediate reactions with formic and acetic acid near the collision limit: Direct kinetics measurements and atmospheric implications, *Angew. Chem.*, 126, 4635–4638, doi:10.1002/ange.201400964, 2014.
- Wilhelm, E., Battino, R., and Wilcock, R. J.: Low-pressure solubility of gases in liquid water, *Chem. Rev.*, 77, 219–262, 1977.
- Wine, P. H., Tang, Y., Thorn, R. P., Wells, J. R., and Davis, D. D.: Kinetics of aqueous phase reactions of the  $\text{SO}_4^-$  radical with potential importance in cloud chemistry, *J. Geophys. Res.*, 94D, 1085–1094, 1989.
- Wingenter, O. W., Sive, B. C., Blake, N. J., and Rowland, F. S.: Atomic chlorine concentrations determined from ethane and hydroxyl measurements made over the Central Pacific Ocean, *Eos, Trans. AGU (Abstract Supplement)*, 80, F149–F150, 1999.
- Wolfe, G. M., Thornton, J. A., Bouvier-Brown, N. C., Goldstein, A. H., Park, J.-H., McKay, M., Matross, D. M., Mao, J., Brune, W. H., LaFranchi, B. W., Browne, E. C., Min, K.-E., Wooldridge, P. J., Cohen, R. C., Crouse, J. D., Faloona, I. C., Gilman, J. B., Kuster, W. C., de Gouw, J. A., Huisman, A., and Keutsch, F. N.: The chemistry of atmosphere-forest exchange (CAFE) model - part 2: application to BEARPEX-2007 observations, *Atmos. Chem. Phys.*, 11, 1269–1294, doi:10.5194/acp-11-1269-2011, 2011.
- Worsnop, D. R., Zahniser, M. S., Kolb, C. E., Gardner, J. A., Watson, L. R., van Doren, J. M., Jayne, J. T., and Davidovits, P.: The temperature dependence of mass accommodation of  $\text{SO}_2$  and  $\text{H}_2\text{O}_2$  on aqueous surfaces, *J. Phys. Chem.*, 93, 1159–1172, 1989.
- Wu, D., Wong, D., and Di Bartolo, B.: Evolution of  $\text{Cl}_2^-$  in aqueous NaCl solutions, *J. Photochem.*, 14, 303–310, 1980.
- Yiin, B. S. and Margerum, D. W.: Nonmetal redox kinetics: reactions of iodine and triiodide with sulfite and hydrogen sulfite and the hydrolysis of iodofate, *Inorg. Chem.*, 29, 1559–1564, 1990.
- Yin, F., Grosjean, D., and Seinfeld, J. H.: Photooxidation of dimethyl sulfide and dimethyl disulfide. I: Mechanism development, *J. Atmos. Chem.*, 11, 309–364, 1990.
- Yoon, M.-C., Choi, Y. S., and Kim, S. K.: The OH production from the  $\pi - \pi^*$  transition of acetylacetone, *Chem. Phys. Lett.*, 300, 207–212, doi:10.1016/S0009-2614(98)01373-6, 1999.
- Yu, X.-Y.: Critical evaluation of rate constants and equilibrium constants of hydrogen peroxide photolysis in acidic aqueous solutions containing chloride ions, *J. Phys. Chem. Ref. Data*, 33, 747–763, 2004.
- Zehavi, D. and Rabani, J.: The oxidation of aqueous bromide by hydroxyl radicals. A pulse radiolytic investigation, *J. Phys. Chem.*, 76, 312–319, 1972.
- Zellner, R., Hartmann, D., Karthäuser, J., Rhäsa, D., and Weibring, G.: A laser photolysis/LIF study of the reactions of  $\text{O}(^3\text{P})$  atoms with  $\text{CH}_3$  and  $\text{CH}_3\text{O}_2$  radicals, *J. Chem. Soc. Faraday Trans. 2*, 84, 549–568, doi:10.1039/f29888400549, 1988.
- Zellner, R., Exner, M., and Herrmann, H.: Absolute OH quantum yield in the laser photolysis of nitrate, nitrite and dissolved  $\text{H}_2\text{O}_2$  at 308 and 351 nm in the temperature range 278–353 K, *J. Atmos. Chem.*, 10, 411–425, 1990.
